# Supplementary material for: CuSO4-Catalyzed dual annulation to synthesize O, S or N-containing tetracyclic heteroacenes
Source: Royal Society of Chemistry journal article supplement (doi:10.1039/d0cc01172j), 2020-01-01

ESI

# CuSO<sub>4</sub>-Catalyzed Dual Annulation to Synthesize O, S or N-Containing Tetracyclic Heteroacenes

Xiang-Huan Shan,<sup>†a</sup> Bo Yang,<sup>†a</sup> Jian-Ping Qu,<sup>b</sup> and Yan-Biao Kang<sup>\*b</sup>

a Department of Chemistry, University of Science and Technology of China, Hefei, Anhui 230026, China

b Institute of Advanced Synthesis, School of Chemistry and Molecular Engineering, Nanjing Tech University, Nanjing 211816, China

## Contents

|                                |     |
|--------------------------------|-----|
| 1. General information         | S1  |
| 2. General procedures          | S1  |
| 3. X-ray crystallographic data | S35 |
| 4. References                  | S37 |
| 5. NMR spectra                 | S38 |

### 1. General information

Solvents were predried over activated 4 Å molecular sieves and further dried by refluxing and distilling over sodium (1,4-dioxane), CaH<sub>2</sub> (toluene, octane, CH<sub>3</sub>CN, CH<sub>2</sub>Cl<sub>2</sub>, DMSO and DMF) or P<sub>2</sub>O<sub>5</sub> (PhCl) under argon atmosphere. CuSO<sub>4</sub> (>98%) was purchased from J&K. <sup>1</sup>H, <sup>13</sup>C{<sup>1</sup>H} NMR spectra were recorded on a Bruker 400 spectrometer. Chemical shifts are reported in δ units relative to CDCl<sub>3</sub> [<sup>1</sup>H δ = 7.26, <sup>13</sup>C δ = 77.16], DMSO-*d*<sub>6</sub> [<sup>1</sup>H δ = 2.50, <sup>13</sup>C δ = 39.52].

### 2. General procedures

#### 2.1. Screening reaction conditions (Table 1)

To a Schlenk tube charged with CuSO<sub>4</sub> (0.025 mmol, 4 mg) and <sup>t</sup>BuOK (1.1 mmol, 124 mg) was added **3a** (0.5 mmol, 167.5 mg) and solvent (10 mL) and the resulting reaction mixture was stirred at 90 °C (oil bath). The reaction mixture was directly purified by silica gel column to give the desired product.

#### 2.2. Preparation of Starting Materials

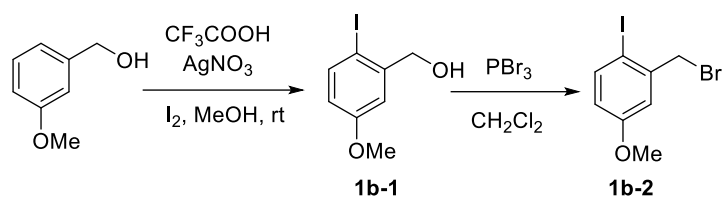

A 100 mL round-bottom flask was charged with benzyl alcohol (10 mmol),  $\text{CF}_3\text{COOH}$  (13 mmol) and  $\text{AgNO}_3$  (13 mmol). Then MeOH (15 mL) was added and cooled by ice bath. A solution of  $\text{I}_2$  (1.0 equiv) in MeOH (25 mL) was added dropwise over 30 min. The resulting reaction mixture was monitored by TLC. Then filtered and concentrated under vacuum. The residue benzyl alcohol **1b-1** was used in the next step without purification.  $\text{PBr}_3$  (1.0 mL, 16 mmol) was added over a solution of **1b-1** (8 mmol) in dry  $\text{CH}_2\text{Cl}_2$  (100 mL), and the reaction mixture was stirred at rt for 5 h. After rotary evaporation of solvent, the resulting oil was washed with saturated  $\text{NaHCO}_3$ . The resulting aqueous phase was extracted with  $\text{CH}_2\text{Cl}_2$ . The combined organic phases were dried  $\text{Na}_2\text{SO}_4$ , concentrated and purified on silica gel chromatography (EtOAc/petroleum ether as eluent) to afford **1b-2** as white solid. (2.22 g, 85%).  $^1\text{H}$  NMR (400 MHz,  $\text{CDCl}_3$ )  $\delta$  7.69 (d,  $J = 8.4$  Hz, 1H), 7.03 (d,  $J = 2.8$  Hz, 1H), 6.59 (dd,  $J = 8.8, 3.2$  Hz, 1H), 4.54 (s, 2H), 3.79 (s, 3H).  $^{13}\text{C}\{^1\text{H}\}$  NMR (100 MHz,  $\text{CDCl}_3$ )  $\delta$  160.3, 141.1, 140.6, 116.5, 116.3, 88.5, 55.6, 38.9.<sup>1</sup>

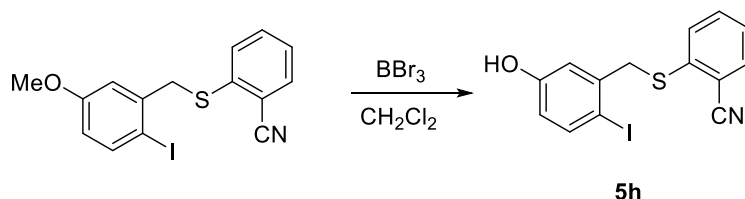

**5b** (10 mmol) was dissolved in 50 mL of DCM.  $\text{BBr}_3$  (25 mmol) was added to the mixture and the mixture stirred at  $-78$  °C. The reaction was stirred at room temperature. The resulting reaction mixture was monitored by TLC. The mixture was diluted with water and extracted with EtOAc (3  $\times$  30 mL). The combined organic layers were washed with brine, dried over anhydrous  $\text{Na}_2\text{SO}_4$ , and concentrated by rotary evaporation. Purification by silica gel chromatography (EtOAc/petroleum ether as eluent) to obtain **5h** as white solid, 3.60 g, 98%.  $^1\text{H}$  NMR (400 MHz,  $\text{DMSO}-d_6$ )  $\delta$  9.77-9.76 (m, 1H), 7.83-7.78 (m, 1H), 7.68-7.54 (m, 3H), 7.41-7.35 (m, 1H), 6.90-6.88 (m, 1H), 6.54-6.50 (m, 1H), 4.31 (s, 2H).  $^{13}\text{C}\{^1\text{H}\}$  NMR (100 MHz,  $\text{DMSO}-d_6$ )  $\delta$  157.9, 140.4, 139.9, 139.1, 133.8, 133.6, 129.1, 126.7, 117.7, 117.4, 116.9, 111.7, 87.1, 42.2. HRMS (ESI-TOF)  $m/z$ :  $[\text{M}+\text{Na}]^+$  calcd for  $\text{C}_{14}\text{H}_{10}\text{NOISNa}$  389.9420; found 389.9429.

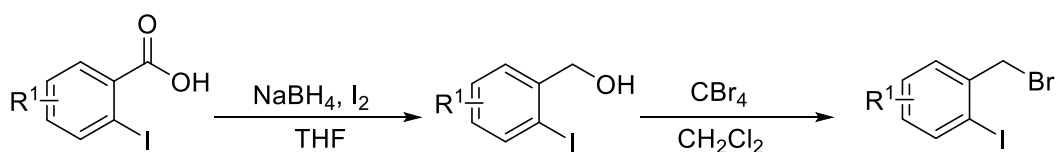

A 100 mL round-bottom flask was charged with benzoic acid (8 mmol) and THF (20 mL, pre-dried over sodium). NaBH<sub>4</sub> (2.5 equiv) was added and cooled in an ice bath. A solution of I<sub>2</sub> (1.0 equiv) in THF (10 mL) was added dropwise over 30 min with vigorous evolution of hydrogen. After H<sub>2</sub> evolution had ceased, the flask was heated to reflux for 12 h and then cooled to room temperature, diluted with methanol until the solid disappeared. After stirring 30 min, the solvent was removed by rotary evaporation leaving a white paste which was dissolved by addition of 20% aqueous KOH (20 mL). The solution was stirred for 4 h and extracted with ethyl acetate (30 mL × 2). The combined organic extracts were washed with brine, dried over anhydrous MgSO<sub>4</sub>, filtered, and concentrated under vacuum. This was purified by flash chromatography.

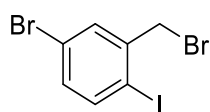

**4-bromo-2-(bromomethyl)-1-iodobenzene (1c)**

<sup>1</sup>H NMR (400 MHz, CDCl<sub>3</sub>) δ 7.69 (d, *J* = 8.4 Hz, 1H), 7.60 (d, *J* = 2.4 Hz, 1H), 7.11 (dd, *J* = 8.4, 2.0 Hz, 1H), 4.51 (s, 2H). <sup>13</sup>C{<sup>1</sup>H} NMR (100 MHz, CDCl<sub>3</sub>) δ 142.3, 141.4, 133.4, 133.2, 122.9, 98.0, 37.6.<sup>2</sup>

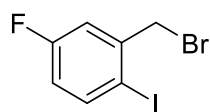

**2-(bromomethyl)-4-fluoro-1-iodobenzene (1f)**

<sup>1</sup>H NMR (400 MHz, CDCl<sub>3</sub>) δ 7.78 (dd, *J* = 8.8, 5.6 Hz, 1H), 7.21 (dd, *J* = 9.2, 3.2 Hz, 1H), 6.76 (ddd, *J* = 10.8, 8.0, 2.8 Hz, 1H), 4.53 (s, 2H). <sup>13</sup>C{<sup>1</sup>H} NMR (100 MHz, CDCl<sub>3</sub>) δ 163.1 (d, *J* = 247.6 Hz), 142.3 (d, *J* = 7.3 Hz), 141.3 (d, *J* = 7.8 Hz), 117.8 (d, *J* = 6.6 Hz), 117.6 (d, *J* = 5.6 Hz), 92.9 (d, *J* = 3.0 Hz), 37.8.<sup>3</sup>

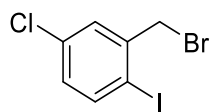

**2-(bromomethyl)-4-chloro-1-iodobenzene (1e)**

<sup>1</sup>H NMR (400 MHz, CDCl<sub>3</sub>) δ 7.76 (d, *J* = 8.4 Hz, 1H), 7.45 (d, *J* = 2.4 Hz, 1H), 6.98 (dd, *J* = 8.4, 2.4 Hz, 1H), 4.52 (s, 2H). <sup>13</sup>C{<sup>1</sup>H} NMR (100 MHz, CDCl<sub>3</sub>) δ 142.0, 141.1, 135.1, 130.5, 130.3, 97.1, 37.7.<sup>2</sup>

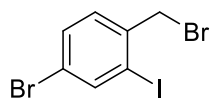

**4-bromo-1-(bromomethyl)-2-iodobenzene (1j)**

<sup>1</sup>H NMR (400 MHz, CDCl<sub>3</sub>) δ 8.00 (d, *J* = 1.6 Hz, 1H), 7.48-7.45 (m, 1H), 7.33 (d, *J* = 8.0 Hz, 1H), 4.54 (s, 2H). <sup>13</sup>C{<sup>1</sup>H} NMR (100 MHz, CDCl<sub>3</sub>) δ 142.1, 139.4, 132.2, 131.4, 123.0, 100.5, 37.8.<sup>4</sup>

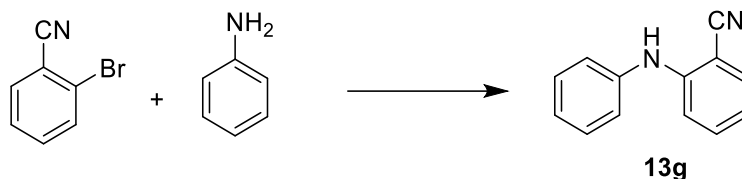

Under nitrogen, a mixture of 2-bromobenzonitrile (10 mmol), aniline (15 mmol), Pd(dppf)Cl<sub>2</sub> (0.5 mmol), PPh<sub>3</sub> (3 mmol) and Cs<sub>2</sub>CO<sub>3</sub> (20 mmol) in 1,4-dioxane (40 mL) was heated at 95 °C for 24 h. The reaction was quenched with water and extracted with EtOAc. After concentration of the organic solution in vacuum. Purification by silica gel chromatography (EtOAc/petroleum ether as eluent) to obtain **13g** as yellow solid, 1.61 g, 83%. <sup>1</sup>H NMR (400 MHz, CDCl<sub>3</sub>) δ 7.51 (dd, *J* = 8.0, 1.6 Hz, 1H), 7.40-7.35 (m, 3H), 7.22-7.18 (m, 3H), 7.16-7.12 (m, 1H), 6.84 (td, *J* = 8.0, 1.2 Hz, 1H), 6.40 (s, 2H). <sup>13</sup>C{<sup>1</sup>H} NMR (100 MHz, CDCl<sub>3</sub>) δ 147.4, 140.0, 134.0, 133.1, 129.7, 124.3, 121.8, 119.3, 117.7, 114.2, 98.6.<sup>5</sup>

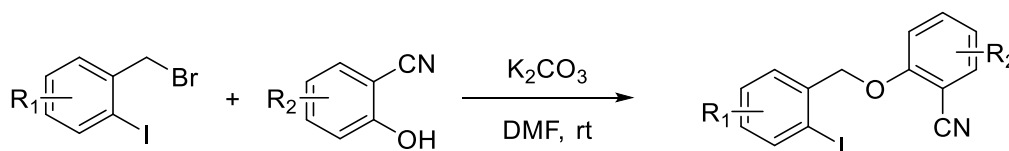

To a solution of Phenyl nitrile (10 mmol) in DMF(30 mL) was added K<sub>2</sub>CO<sub>3</sub> (30 mmol) under stirring. After 10 min, Benzyl bromide (12 mmol) was added. The resulting reaction mixture was monitored by TLC. The reaction was quenched by H<sub>2</sub>O and extracted with EtOAc. The combined organic extracts were washed with brine, dried over anhydrous Na<sub>2</sub>SO<sub>4</sub>, filtered, concentrated and purified on silica gel chromatography (EtOAc/CH<sub>2</sub>Cl<sub>2</sub>/petroleum ether as eluent) to give the product.

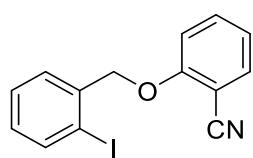

**2-((2-iodobenzyl)oxy)benzonitrile (3aA)**

This compound was prepared according to the general procedure, white solid, 3.18 g, 95%. <sup>1</sup>H NMR (400 MHz, CDCl<sub>3</sub>) δ 7.84 (dd, *J* = 7.6, 0.8 Hz, 1H), 7.62-7.58 (m, 2H), 7.53 (ddd, *J* = 9.2, 7.6, 1.6 Hz, 1H), 7.39 (td, *J* = 7.6, 1.2 Hz, 1H), 7.06-6.99 (m, 3H), 5.13 (s, 2H). <sup>13</sup>C{<sup>1</sup>H} NMR (100 MHz, CDCl<sub>3</sub>) δ 159.9, 139.3, 137.8, 134.6, 134.0, 129.8, 128.8, 128.3, 121.5, 116.5, 112.9, 102.4, 96.5, 74.4. HRMS (ESI-TOF) *m/z*: [M+H]<sup>+</sup> calcd for C<sub>14</sub>H<sub>11</sub>INO 335.9880; found 335.9880.

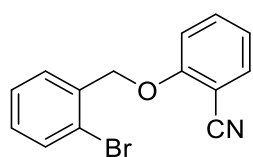

**2-((2-bromobenzyl)oxy)benzonitrile (3aB)**

This compound was prepared according to the general procedure, white solid, 2.19 g, 76%.  $^1\text{H}$  NMR (400 MHz,  $\text{CDCl}_3$ )  $\delta$  7.65 (d,  $J = 7.2$  Hz, 1H), 7.60-7.50 (m, 3H), 7.36 (t,  $J = 7.6$  Hz, 1H), 7.19 (t,  $J = 8.0$  Hz, 1H), 7.05-7.00 (m, 2H), 5.22 (s, 2H).  $^{13}\text{C}\{^1\text{H}\}$  NMR (100 MHz,  $\text{CDCl}_3$ )  $\delta$  160.0, 135.0, 134.5, 133.9, 132.6, 129.5, 128.5, 127.9, 121.7, 121.4, 116.4, 112.8, 102.4, 69.8. HRMS (ESI-TOF)  $m/z$ :  $[\text{M}+\text{Na}]^+$  calcd for  $\text{C}_{14}\text{H}_{10}\text{NOBrNa}$  309.9838; found 309.9845.

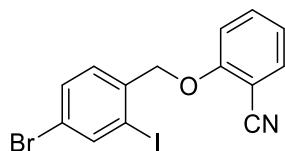

**2-((4-bromo-2-iodobenzyl)oxy)benzonitrile (3b)**

This compound was prepared according to the general procedure, white solid, 3.64 g, 88%.  $^1\text{H}$  NMR (400 MHz,  $\text{CDCl}_3$ )  $\delta$  8.01 (d,  $J = 1.6$  Hz, 1H), 7.61 (dd,  $J = 7.6, 1.6$  Hz, 1H), 7.57-7.48 (m, 3H), 7.07 (t,  $J = 7.6$  Hz, 1H), 6.99 (d,  $J = 8.8$  Hz, 1H), 5.08 (s, 2H).  $^{13}\text{C}\{^1\text{H}\}$  NMR (100 MHz,  $\text{CDCl}_3$ )  $\delta$  159.7, 141.2, 137.0, 134.6, 134.1, 132.0, 129.4, 122.6, 121.7, 116.4, 112.9, 102.6, 96.6, 73.9. HRMS (ESI-TOF)  $m/z$ :  $[\text{M}+\text{Na}]^+$  calcd for  $\text{C}_{14}\text{H}_9\text{BrINONa}$  435.8804; found 435.8807.

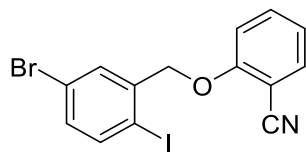

**2-((5-bromo-2-iodobenzyl)oxy)benzonitrile (3c)**

This compound was prepared according to the general procedure, white solid, 3.39 g, 82%.  $^1\text{H}$  NMR (400 MHz,  $\text{CDCl}_3$ )  $\delta$  7.72 (d,  $J = 2.4$  Hz, 1H), 7.69 (d,  $J = 8.0$  Hz, 1H), 7.62 (dd,  $J = 7.6, 1.6$  Hz, 1H), 7.55 (td,  $J = 7.6, 1.6$  Hz, 1H), 7.19 (dd,  $J = 8.4, 2.4$  Hz, 1H), 7.08 (td,  $J = 7.6, 0.8$  Hz, 1H), 6.97 (d,  $J = 8.4$  Hz, 1H), 5.10 (s, 2H).  $^{13}\text{C}\{^1\text{H}\}$  NMR (100 MHz,  $\text{CDCl}_3$ )  $\delta$  159.7, 140.5, 139.9, 134.6, 134.1, 133.0, 131.4, 123.3, 121.8, 116.3, 112.9, 102.6, 94.2, 74.0. HRMS (ESI-TOF)  $m/z$ :  $[\text{M}+\text{Na}]^+$  calcd for  $\text{C}_{14}\text{H}_9\text{BrINONa}$  435.8804; found 435.8811.

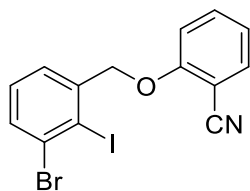

**2-((3-bromo-2-iodobenzyl)oxy)benzonitrile (3d)**

This compound was prepared according to the general procedure, white solid, 3.65 g, 88%.  $^1\text{H}$  NMR (400 MHz,  $\text{CDCl}_3$ )  $\delta$  7.65-7.61 (m, 2H), 7.57-7.53 (m, 2H), 7.30 (t,  $J = 8.0$  Hz, 1H), 7.07 (t,  $J = 7.6$  Hz, 1H), 6.99 (d,  $J = 8.4$  Hz, 1H), 5.17 (s, 2H).  $^{13}\text{C}\{^1\text{H}\}$  NMR (100 MHz,  $\text{CDCl}_3$ )  $\delta$  159.7, 141.2, 134.6, 134.0, 132.2, 131.1, 129.9, 126.2, 121.6, 116.4, 112.8, 103.2, 102.4, 76.0. HRMS (ESI-TOF)  $m/z$ :  $[\text{M}+\text{Na}]^+$  calcd for  $\text{C}_{14}\text{H}_9\text{BrINONa}$  435.8804; found 435.8807.

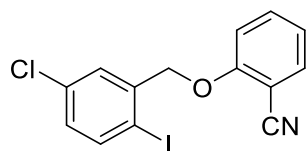

**2-((5-chloro-2-iodobenzyl)oxy)benzonitrile (3e)**

This compound was prepared according to the general procedure, white solid, 3.07 g, 83%.  $^1\text{H}$  NMR (400 MHz,  $\text{CDCl}_3$ )  $\delta$  7.77 (dd,  $J = 8.4, 0.8$  Hz, 1H), 7.62 (d,  $J = 7.6$  Hz, 1H), 7.59-7.53 (m, 2H), 7.10-7.04 (m, 2H), 6.97 (d,  $J = 8.8$  Hz, 1H), 5.10 (s, 2H).  $^{13}\text{C}\{^1\text{H}\}$  NMR (100 MHz,  $\text{CDCl}_3$ )  $\delta$  159.7, 140.3, 139.6, 135.4, 134.6, 134.1, 130.1, 128.5, 121.8, 116.3, 112.9, 102.6, 93.2, 74.1. HRMS (ESI-TOF)  $m/z$ :  $[\text{M}+\text{Na}]^+$  calcd for  $\text{C}_{14}\text{H}_9\text{ClINONa}$  391.9310; found 391.9308.

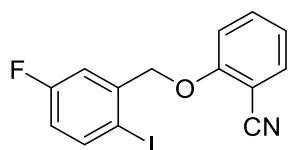

**2-((2-fluoro-6-iodobenzyl)oxy)benzonitrile (3f)**

This compound was prepared according to the general procedure, white solid, 3.00 g, 85%.  $^1\text{H}$  NMR (400 MHz,  $\text{CDCl}_3$ )  $\delta$  7.71 (dd,  $J = 6.4, 2.0$  Hz, 1H), 7.59-7.55 (m, 2H), 7.16 (d,  $J = 8.0$  Hz, 1H), 7.13-7.04 (m, 3H), 5.26 (d,  $J = 2.4$  Hz, 1H).  $^{13}\text{C}\{^1\text{H}\}$  NMR (100 MHz,  $\text{CDCl}_3$ )  $\delta$  161.1 (d,  $J = 252.3$  Hz), 160.2, 135.8 (d,  $J = 3.6$  Hz), 134.4, 134.2, 132.3 (d,  $J = 9.2$  Hz), 125.8 (d,  $J = 15.5$  Hz), 121.5, 116.3, 116.0 (d,  $J = 22.7$  Hz), 113.0, 102.7, 101.6 (d,  $J = 2.3$  Hz), 68.0 (d,  $J = 4.0$  Hz). HRMS (ESI-TOF)  $m/z$ :  $[\text{M}+\text{H}]^+$  calcd for  $\text{C}_{14}\text{H}_{10}\text{FINO}$  353.9786; found 353.9783.

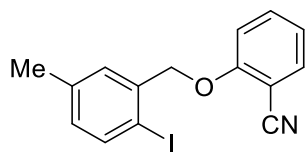

**2-((2-iodo-5-methylbenzyl)oxy)benzonitrile (3g)**

This compound was prepared according to the general procedure, white solid, 2.97 g, 85%.  $^1\text{H}$  NMR (400 MHz,  $\text{CDCl}_3$ )  $\delta$  7.71 (d,  $J = 8.4$  Hz, 1H), 7.60 (dd,  $J = 7.6, 1.6$  Hz, 1H), 7.53 (ddd,  $J = 8.4, 7.6, 1.6$  Hz, 1H), 7.41 (d,  $J = 1.6$  Hz, 1H), 7.04 (td,  $J = 7.6, 0.8$  Hz, 1H), 6.99 (d,  $J = 8.4$  Hz, 1H), 6.87 (dt,  $J = 8.0, 0.8$  Hz, 1H), 5.12 (s, 2H), 2.32 (s, 3H).  $^{13}\text{C}\{^1\text{H}\}$  NMR (100 MHz,  $\text{CDCl}_3$ )  $\delta$  160.1, 139.1, 139.0, 137.5, 134.5, 134.0, 130.9, 129.3, 121.4, 116.5, 113.1, 102.5, 92.5, 74.6, 21.3. HRMS (ESI-TOF)  $m/z$ :  $[\text{M}+\text{Na}]^+$  calcd for  $\text{C}_{15}\text{H}_{12}\text{NOINa}$  371.9856; found 371.9867.

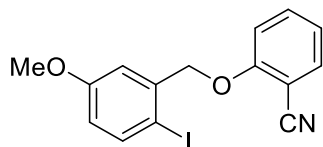

**2-((2-iodo-5-methoxybenzyl)oxy)benzonitrile (3h)**

This compound was prepared according to the general procedure, white solid, 3.25 g, 89%.  $^1\text{H}$  NMR (400 MHz,  $\text{CDCl}_3$ )  $\delta$  7.69 (d,  $J = 8.4$  Hz, 1H), 7.61 (dd,  $J = 7.6, 1.2$  Hz, 1H), 7.57-7.53 (m, 1H), 7.28 (d,  $J = 2.8$  Hz, 1H), 7.06 (td,  $J = 7.6, 0.8$  Hz, 1H), 7.02 (d,  $J = 8.4$  Hz, 1H), 6.65 (dd,  $J =$

8.8, 3.2 Hz, 1H), 5.11 (s, 2H), 3.82 (s, 3H).  $^{13}\text{C}\{^1\text{H}\}$  NMR (100 MHz,  $\text{CDCl}_3$ )  $\delta$  160.5, 160.0, 139.7, 138.9, 134.6, 133.9, 121.6, 116.7, 116.5, 113.6, 113.0, 102.6, 84.1, 74.3, 55.6. HRMS (ESI-TOF)  $m/z$ :  $[\text{M}+\text{Na}]^+$  calcd for  $\text{C}_{15}\text{H}_{12}\text{INO}_2\text{Na}$  387.9805; found 387.9805.

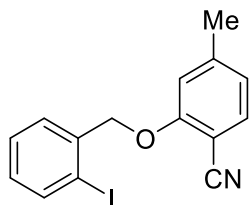

**2-((2-iodobenzyl)oxy)-4-methylbenzonitrile (3i)**

This compound was prepared according to the general procedure, white solid, 2.79 g, 80%.  $^1\text{H}$  NMR (400 MHz,  $\text{CDCl}_3$ )  $\delta$  7.86 (d,  $J = 8.0$  Hz, 1H), 7.63 (d,  $J = 7.6$  Hz, 1H), 7.48 (d,  $J = 7.6$  Hz, 1H), 7.42 (t,  $J = 7.6$  Hz, 1H), 7.05 (t,  $J = 7.6$  Hz, 1H), 6.86 (dd,  $J = 7.6, 0.4$  Hz, 1H), 6.82 (s, 1H), 5.12 (s, 2H), 2.41 (s, 3H).  $^{13}\text{C}\{^1\text{H}\}$  NMR (100 MHz,  $\text{CDCl}_3$ )  $\delta$  160.0, 146.0, 139.3, 138.0, 133.7, 129.8, 128.8, 128.4, 122.4, 116.8, 113.6, 99.5, 96.5, 74.4, 22.5. HRMS (ESI-TOF)  $m/z$ :  $[\text{M}+\text{Na}]^+$  calcd for  $\text{C}_{15}\text{H}_{12}\text{INONa}$  371.9856; found 371.9852.

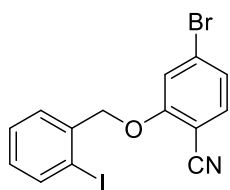

**4-bromo-2-((2-iodobenzyl)oxy)benzonitrile (3j)**

This compound was prepared according to the general procedure, white solid, 4.10 g, 99%.  $^1\text{H}$  NMR (400 MHz,  $\text{DMSO}-d_6$ )  $\delta$  7.95 (dd,  $J = 8.0, 0.8$  Hz, 1H), 7.73 (d,  $J = 8.0$  Hz, 1H), 7.67 (d,  $J = 2.0$  Hz, 1H), 7.59 (dd,  $J = 7.6, 1.6$  Hz, 1H), 7.48 (td,  $J = 7.2, 1.2$  Hz, 1H), 7.36 (dd,  $J = 8.4, 1.6$  Hz, 1H), 7.17 (td,  $J = 7.6, 1.6$  Hz, 1H), 5.24 (s, 2H).  $^{13}\text{C}\{^1\text{H}\}$  NMR (100 MHz,  $\text{DMSO}-d_6$ )  $\delta$  160.2, 139.4, 137.6, 135.1, 130.7, 130.2, 128.6 (two peaks), 124.7, 116.9, 115.7, 100.1, 99.6, 74.7. HRMS (ESI-TOF)  $m/z$ :  $[\text{M}+\text{Na}]^+$  calcd for  $\text{C}_{14}\text{H}_9\text{BrINONa}$  435.8810; found 435.8806.

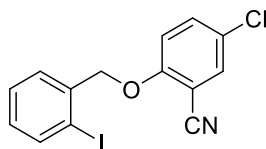

**5-chloro-2-((2-iodobenzyl)oxy)benzonitrile (3k)**

This compound was prepared according to the general procedure, white solid, 2.92 g, 79%.  $^1\text{H}$  NMR (400 MHz,  $\text{CDCl}_3$ )  $\delta$  7.87 (dd,  $J = 8.0, 1.2$  Hz, 1H), 7.58-7.56 (m, 2H), 7.49 (dd,  $J = 9.2, 2.8$  Hz, 1H), 7.41 (td,  $J = 7.6, 0.8$  Hz, 1H), 7.06 (td,  $J = 8.0, 1.6$  Hz, 1H), 6.95 (d,  $J = 8.8$  Hz, 1H), 5.15 (s, 2H).  $^{13}\text{C}\{^1\text{H}\}$  NMR (100 MHz,  $\text{CDCl}_3$ )  $\delta$  158.7, 139.4, 137.4, 134.5, 133.3, 130.1, 128.9, 128.4,

126.4, 115.1, 114.4, 103.9, 96.6, 75.0. HRMS (ESI-TOF)  $m/z$ :  $[M+Na]^+$  calcd for  $C_{14}H_9ClINONa$  391.9310; found 391.9308.

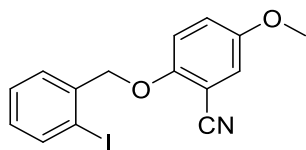

**2-((2-iodobenzyl)oxy)-5-methoxybenzonitrile (3l)**

This compound was prepared according to the general procedure, light red solid, 2.74 g, 75%.  $^1H$  NMR (400 MHz,  $CDCl_3$ )  $\delta$  7.85 (dd,  $J = 8.0, 1.2$  Hz, 1H), 7.61 (d,  $J = 7.2$  Hz, 1H), 7.52 (d,  $J = 8.4$  Hz, 1H), 7.41 (td,  $J = 7.6, 0.8$  Hz, 1H), 7.05 (td,  $J = 7.6, 1.6$  Hz, 1H), 6.55 (dd,  $J = 8.4, 2.0$  Hz, 1H), 6.50 (d,  $J = 2.4$  Hz, 1H), 5.12 (s, 2H), 3.84 (s, 3H).  $^{13}C\{^1H\}$  NMR (100 MHz,  $CDCl_3$ )  $\delta$  164.6, 161.5, 139.3, 137.8, 135.1, 129.9, 128.9, 128.5, 116.9, 106.5, 100.1, 96.5, 94.6, 74.5, 55.9. HRMS (ESI-TOF)  $m/z$ :  $[M+Na]^+$  calcd for  $C_{15}H_{12}INO_2Na$  387.9805; found 387.9804.

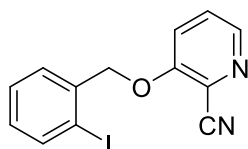

**3-((2-iodobenzyl)oxy)picolinonitrile (3m)**

This compound was prepared according to the general procedure, white solid, 3.06 g, 91%.  $^1H$  NMR (400 MHz,  $CDCl_3$ )  $\delta$  8.33 (dd,  $J = 4.8, 1.2$  Hz, 1H), 7.88 (d,  $J = 8.0$  Hz, 1H), 7.57 (d,  $J = 7.2$  Hz, 1H), 7.48 (dd,  $J = 8.4, 4.4$  Hz, 1H), 7.44-7.37 (m, 2H), 7.08 (t,  $J = 8.0$  Hz, 1H), 5.20 (s, 2H).  $^{13}C\{^1H\}$  NMR (100 MHz,  $CDCl_3$ )  $\delta$  157.5, 143.4, 139.5, 137.0, 130.3, 129.0, 128.5, 128.0, 124.3, 120.8, 115.1, 96.7, 74.8. HRMS (ESI-TOF)  $m/z$ :  $[M+Na]^+$  calcd for  $C_{13}H_9IN_2ONa$  358.9652; found 358.9653.

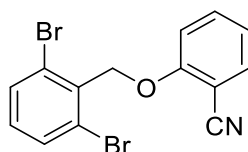

**2-((2,6-dibromobenzyl)oxy)benzonitrile (3n)**

This compound was prepared according to the general procedure, white solid, 1.87 g, 51%.  $^1H$  NMR (400 MHz,  $DMSO-d_6$ )  $\delta$  7.79-7.71 (m, 4H), 7.51 (d,  $J = 8.4$  Hz, 1H), 7.33 (t,  $J = 8.4$  Hz, 1H), 7.16 (t,  $J = 7.6$  Hz, 1H), 5.41 (s, 2H).  $^{13}C\{^1H\}$  NMR (100 MHz,  $DMSO-d_6$ )  $\delta$  159.8, 135.2, 133.9, 133.5, 132.8, 132.7, 126.3, 121.8, 116.1, 113.3, 100.7, 71.2. HRMS (ESI-TOF)  $m/z$ :  $[M+Na]^+$  calcd for  $C_{14}H_9Br_2NONa$  387.8943; found 387.8936.



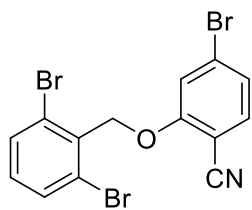

**4-bromo-2-((2,6-dibromobenzyl)oxy)benzonitrile (3o)**

This compound was prepared according to the general procedure, white solid, 3.21 g, 72%.  $^1\text{H}$  NMR (400 MHz,  $\text{CDCl}_3$ )  $\delta$  7.62 (s, 1H), 7.60 (s, 1H), 7.44 (d,  $J = 8.4$  Hz, 1H), 7.35 (d,  $J = 1.6$  Hz, 1H), 7.22 (dd,  $J = 8.0, 1.6$  Hz, 1H), 7.13 (t,  $J = 8.0$  Hz, 1H), 5.42 (s, 2H).  $^{13}\text{C}\{^1\text{H}\}$  NMR (100 MHz,  $\text{CDCl}_3$ )  $\delta$  160.6, 134.7, 133.2, 132.7, 131.8, 128.7, 126.8, 124.8, 116.8, 115.5, 101.7, 71.5. HRMS (ESI-TOF)  $m/z$ :  $[\text{M}+\text{H}]^+$  calcd for  $\text{C}_{14}\text{H}_9\text{Br}_3\text{NO}$  443.8229; found 443.8236.

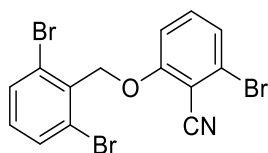

**2-bromo-6-((2,6-dibromobenzyl)oxy)benzonitrile (3p)**

This compound was prepared according to the general procedure, white solid, 2.19 g, 76%.  $^1\text{H}$  NMR (400 MHz,  $\text{CDCl}_3$ )  $\delta$  7.60 (d,  $J = 8.0$  Hz, 2H), 7.42 (t,  $J = 8.0$  Hz, 1H), 7.29 (d,  $J = 8.0$  Hz, 1H), 7.14-7.10 (m, 2H), 5.43 (s, 2H).  $^{13}\text{C}\{^1\text{H}\}$  NMR (100 MHz,  $\text{CDCl}_3$ )  $\delta$  161.9, 134.5, 133.4, 132.8, 131.9, 126.9, 125.6, 114.6, 111.5, 106.4, 71.7. HRMS (ESI-TOF)  $m/z$ :  $[\text{M}+\text{H}]^+$  calcd for  $\text{C}_{14}\text{H}_9\text{Br}_3\text{NO}$  443.8229; found 443.8239.

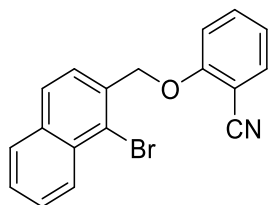

**2-((1-bromonaphthalen-2-yl)methoxy)benzonitrile (3q)**

This compound was prepared according to the general procedure, white solid, 3.15 g, 93%.  $^1\text{H}$  NMR (400 MHz,  $\text{DMSO}-d_6$ )  $\delta$  8.28 (d,  $J = 8.8$  Hz, 1H), 8.07 (d,  $J = 8.4$  Hz, 1H), 8.03 (d,  $J = 7.6$  Hz, 1H), 7.79 (dd,  $J = 7.6, 1.6$  Hz, 1H), 7.76-7.65 (m, 4H), 7.39 (d,  $J = 8.4$  Hz, 1H), 7.15 (td,  $J = 7.6, 0.8$  Hz, 1H), 5.55 (s, 2H).  $^{13}\text{C}\{^1\text{H}\}$  NMR (100 MHz,  $\text{DMSO}-d_6$ )  $\delta$  159.6, 135.2, 133.9, 133.8, 133.4, 131.4, 128.5, 128.3, 127.3, 126.4, 126.3, 122.7, 121.6, 116.3, 113.4, 100.8, 70.7. HRMS (ESI-TOF)  $m/z$ :  $[\text{M}+\text{Na}]^+$  calcd for  $\text{C}_{18}\text{H}_{12}\text{NOBrNa}$  359.9994; found 359.9995.

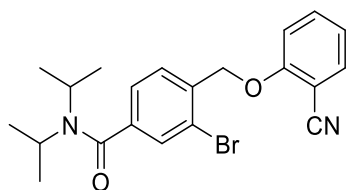

**3-bromo-4-((2-cyanophenoxy)methyl)-N,N-diisopropylbenzamide**

**(3r)**

This compound was prepared according to the general procedure, white solid, 3.41 g, 82%.  $^1\text{H}$  NMR (400 MHz,  $\text{CDCl}_3$ )  $\delta$  7.68 (d,  $J = 7.6$  Hz, 1H), 7.62 (dd,  $J = 7.6, 1.6$  Hz, 1H), 7.58-7.53 (m, 2H), 7.30 (dd,  $J = 8.0, 1.6$  Hz, 1H), 7.09-7.02 (m, 2H), 5.24 (s, 2H), 3.82 (s, 1H), 3.55 (s, 1H), 1.51 (s, 6H), 1.19 (s, 6H).  $^{13}\text{C}\{^1\text{H}\}$  NMR (100 MHz,  $\text{CDCl}_3$ )  $\delta$  168.9, 159.9, 140.2, 135.5, 134.6, 134.0, 130.1, 128.5, 125.0, 121.9, 121.6, 116.4, 112.8, 102.4, 69.7, 51.0, 46.2, 20.8. HRMS (ESI-TOF)  $m/z$ :  $[\text{M}+\text{Na}]^+$  calcd for  $\text{C}_{21}\text{H}_{23}\text{N}_2\text{O}_2\text{BrNa}$  437.0835; found 437.0824.

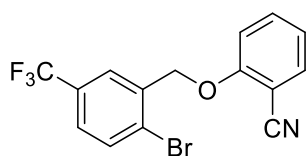

**2-((2-bromo-5-(trifluoromethyl)benzyl)oxy)benzonitrile (3s)**

This compound was prepared according to the general procedure, white solid, 3.45g, 97%.  $^1\text{H}$  NMR (400 MHz,  $\text{CDCl}_3$ )  $\delta$  7.95 (s, 1H), 7.72 (d,  $J = 8.0$  Hz, 1H), 7.62 (dd,  $J = 8.0, 2.0$  Hz, 1H), 7.56 (ddd,  $J = 9.2, 7.6, 1.6$  Hz, 1H), 7.48 (dd,  $J = 8.4, 1.6$  Hz, 1H), 7.09 (td,  $J = 7.2, 0.8$  Hz, 1H), 7.03 (d,  $J = 8.4$  Hz, 1H), 5.25 (s, 2H).  $^{13}\text{C}\{^1\text{H}\}$  NMR (100 MHz,  $\text{CDCl}_3$ )  $\delta$  159.7, 136.3, 134.6, 134.1, 133.4, 130.6 (q,  $J = 32.9$  Hz), 126.4 (q,  $J = 3.6$  Hz), 125.7, 125.5 (q,  $J = 3.9$  Hz), 123.7 (d,  $J = 271.0$  Hz), 121.9, 116.2, 112.8, 102.8, 69.7. HRMS (ESI-TOF)  $m/z$ :  $[\text{M}+\text{Na}]^+$  calcd for  $\text{C}_{15}\text{H}_9\text{NOBrF}_3\text{Na}$  377.9712; found 377.9702.

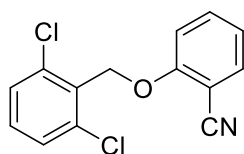

**2-((2,6-dichlorobenzyl)oxy)benzonitrile (3t)**

This compound was prepared according to the general procedure, white solid, 2.40 g, 86%.  $^1\text{H}$  NMR (400 MHz,  $\text{CDCl}_3$ )  $\delta$  7.59-7.55 (m, 2H), 7.39-7.37 (m, 2H), 7.27 (dd,  $J = 8.8, 7.2$  Hz, 1H), 7.17 (dd,  $J = 8.8, 0.8$  Hz, 1H), 7.06 (td,  $J = 7.2, 0.8$  Hz, 1H), 5.39 (s, 2H).  $^{13}\text{C}\{^1\text{H}\}$  NMR (100 MHz,  $\text{CDCl}_3$ )  $\delta$  160.4, 137.2, 134.4, 134.2, 131.0 (two peaks), 128.7, 121.5, 116.3, 113.2, 102.8, 66.2. HRMS (ESI-TOF)  $m/z$ :  $[\text{M}+\text{Na}]^+$  calcd for  $\text{C}_{14}\text{H}_9\text{Cl}_2\text{NONa}$  299.9953; found 299.9946.

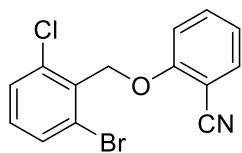

**2-((2-bromo-6-chlorobenzyl)oxy)benzonitrile (3t')**

This compound was prepared according to the general procedure, white solid, 2.74 g, 85%. <sup>1</sup>H NMR (400 MHz, CDCl<sub>3</sub>) δ 7.60-7.54 (m, 3H), 7.41 (dd, *J* = 8.0, 1.2 Hz, 1H), 7.21-7.16 (m, 2H), 7.06 (td, *J* = 7.6, 0.8 Hz, 1H), 5.41 (s, 2H). <sup>13</sup>C{<sup>1</sup>H} NMR (100 MHz, CDCl<sub>3</sub>) δ 160.4, 136.9, 134.4, 134.1, 132.4, 132.0, 131.3, 129.3, 127.1, 121.5, 116.3, 113.2, 102.7, 68.7. HRMS (ESI-TOF) *m/z*: [M+H]<sup>+</sup> calcd for C<sub>14</sub>H<sub>10</sub>BrClNO 321.9629; found 321.9625.

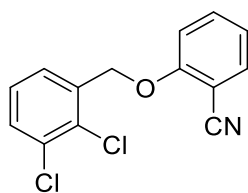

**2-((2,3-dichlorobenzyl)oxy)benzonitrile (3u)**

This compound was prepared according to the general procedure, white solid, 2.59 g, 93%. <sup>1</sup>H NMR (400 MHz, CDCl<sub>3</sub>) δ 7.63-7.61 (m, 2H), 7.55 (ddd, *J* = 9.2, 7.2, 1.6 Hz, 1H), 7.45 (dt, *J* = 8.0, 0.8 Hz, 1H), 7.29 (t, *J* = 8.0 Hz, 1H), 7.07 (td, *J* = 7.6, 1.2 Hz, 1H), 7.02 (d, *J* = 8.4 Hz, 1H), 5.28 (s, 2H). <sup>13</sup>C{<sup>1</sup>H} NMR (100 MHz, CDCl<sub>3</sub>) δ 159.9, 135.9, 134.6, 134.1, 133.2, 130.1, 129.9, 128.0, 126.3, 121.7, 116.4, 112.7, 102.6, 67.8. HRMS (ESI-TOF) *m/z*: [M+Na]<sup>+</sup> calcd for C<sub>14</sub>H<sub>9</sub>Cl<sub>2</sub>NONa 299.9953; found 299.9958.

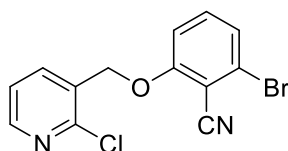

**2-bromo-6-((2-chloropyridin-3-yl)methoxy)benzonitrile (3v)**

This compound was prepared according to the general procedure, white solid, 2.65 g, 82%. <sup>1</sup>H NMR (400 MHz, CDCl<sub>3</sub>) δ 8.38 (d, *J* = 3.6 Hz, 1H), 8.09-8.07 (m, 1H), 7.42 (t, *J* = 8.4 Hz, 1H), 7.36 (dd, *J* = 8.0, 3.2 Hz, 1H), 7.31 (d, *J* = 8.0 Hz, 1H), 7.03 (t, *J* = 8.4 Hz, 1H), 5.24 (s, 2H). <sup>13</sup>C{<sup>1</sup>H} NMR (100 MHz, CDCl<sub>3</sub>) δ 161.1, 149.2, 148.5, 136.9, 134.8, 130.1, 126.8, 125.9, 123.3, 114.7, 111.2, 106.3. HRMS (ESI-TOF) *m/z*: [M+H]<sup>+</sup> calcd for C<sub>13</sub>H<sub>9</sub>BrClN<sub>2</sub>O 322.9581; found 322.9575.

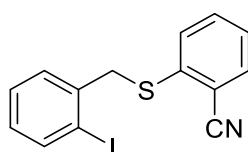

**2-((2-iodobenzyl)thio)benzonitrile (5a)**

This compound was prepared according to the general procedure, white solid, 2.77 g, 79%. <sup>1</sup>H NMR (400 MHz, CDCl<sub>3</sub>) δ 7.82 (d, *J* = 7.6 Hz, 1H), 7.61 (dd, *J* = 7.6, 1.2 Hz, 1H), 7.47-7.43 (m,

1H), 7.36 (dd,  $J = 7.6, 0.8$  Hz, 1H), 7.30 (td,  $J = 7.2, 1.2$  Hz, 1H), 7.25-7.20 (m, 2H), 6.95-6.91 (m, 1H), 4.28 (s, 2H).  $^{13}\text{C}\{^1\text{H}\}$  NMR (100 MHz,  $\text{CDCl}_3$ )  $\delta$  139.9, 139.8, 138.6, 133.7, 132.9, 131.7, 130.1, 129.4, 128.5, 127.2, 117.2, 115.3, 100.7, 44.4. HRMS (ESI-TOF)  $m/z$ :  $[\text{M}+\text{Na}]^+$  calcd for  $\text{C}_{14}\text{H}_{10}\text{INSNa}$  373.9471; found 373.9472.

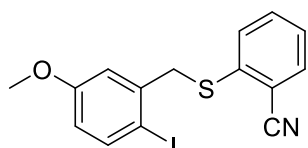

**2-((2-iodo-5-methoxybenzyl)thio)benzonitrile (5b)**

This compound was prepared according to the general procedure, white solid, 3.01 g, 79%.  $^1\text{H}$  NMR (400 MHz,  $\text{CDCl}_3$ )  $\delta$  7.67 (d,  $J = 8.4$  Hz, 1H), 7.63 (dd,  $J = 8.0, 1.6$  Hz, 1H), 7.49-7.44 (m, 1H), 7.38 (dd,  $J = 8.0, 0.8$  Hz, 1H), 7.31 (td,  $J = 7.6, 1.6$  Hz, 1H), 6.84 (d,  $J = 3.2$  Hz, 1H), 6.55 (dd,  $J = 8.8, 3.2$  Hz, 1H), 4.25 (s, 2H), 3.71 (s, 3H).  $^{13}\text{C}\{^1\text{H}\}$  NMR (100 MHz,  $\text{CDCl}_3$ )  $\delta$  160.1, 140.3, 140.0, 139.7, 133.8, 133.0, 131.9, 127.3, 117.3, 115.9, 115.8, 115.4, 89.0, 55.5, 44.4. HRMS (ESI-TOF)  $m/z$ :  $[\text{M}+\text{Na}]^+$  calcd for  $\text{C}_{15}\text{H}_{12}\text{INOSNa}$  403.9576; found 403.9564.

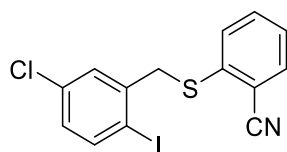

**2-((5-chloro-2-iodobenzyl)thio)benzonitrile (5c)**

This compound was prepared according to the general procedure, white solid, 2.04 g, 53%.  $^1\text{H}$  NMR (400 MHz,  $\text{CDCl}_3$ )  $\delta$  7.74 (d,  $J = 8.4$  Hz, 1H), 7.66 (dd,  $J = 8.0, 1.6$  Hz, 1H), 7.48 (td,  $J = 7.2, 1.2$  Hz, 1H), 7.37-7.33 (m, 2H), 7.16 (d,  $J = 2.8$  Hz, 1H), 6.94 (dd,  $J = 8.4, 2.4$  Hz, 1H), 4.23 (s, 2H).  $^{13}\text{C}\{^1\text{H}\}$  NMR (100 MHz,  $\text{CDCl}_3$ )  $\delta$  140.8, 140.7, 139.1, 134.7, 133.9, 133.0, 132.4, 130.1, 129.5, 127.8, 117.1, 115.9, 97.6, 44.3. HRMS (ESI-TOF)  $m/z$ :  $[\text{M}+\text{Na}]^+$  calcd for  $\text{C}_{14}\text{H}_9\text{INCISNa}$  407.9081; found 407.9072.

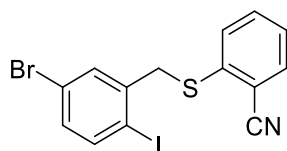

**2-((5-bromo-2-iodobenzyl)thio)benzonitrile (5d)**

This compound was prepared according to the general procedure, white solid, 2.84 g, 66%.  $^1\text{H}$  NMR (400 MHz,  $\text{DMSO}-d_6$ )  $\delta$  7.82 (d,  $J = 7.6$  Hz, 1H), 7.79 (d,  $J = 8.4$  Hz, 1H), 7.68 (t,  $J = 6.8$  Hz, 1H), 7.62 (d,  $J = 7.6$  Hz, 1H), 7.54 (d,  $J = 2.0$  Hz, 1H), 7.43 (t,  $J = 7.6$  Hz, 1H), 7.22 (dd,  $J = 8.4, 2.4$  Hz, 1H), 4.37 (s, 2H).  $^{13}\text{C}\{^1\text{H}\}$  NMR (100 MHz,  $\text{DMSO}-d_6$ )  $\delta$  141.3, 141.2, 139.2, 133.9, 133.7, 132.8, 132.3, 130.4, 127.4, 121.6, 116.8, 112.8, 99.8, 42.1. HRMS (ESI-TOF)  $m/z$ :  $[\text{M}+\text{Na}]^+$  calcd for  $\text{C}_{14}\text{H}_9\text{INBrSNa}$  451.8576; found 451.8561.

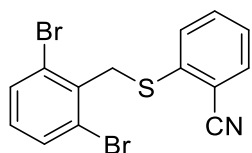

**2-((2,6-dibromobenzyl)thio)benzonitrile (5e)**

This compound was prepared according to the general procedure, white solid, 1.80 g, 47%.  $^1\text{H}$  NMR (400 MHz,  $\text{CDCl}_3$ )  $\delta$  7.64 (dt,  $J = 7.6, 0.8$  Hz, 1H), 7.51-7.48 (m, 4H), 7.40-7.34 (m, 1H), 6.98 (t,  $J = 8.0$  Hz, 1H), 4.53 (s, 2H).  $^{13}\text{C}\{^1\text{H}\}$  NMR (100 MHz,  $\text{CDCl}_3$ )  $\delta$  139.4, 135.9, 134.0, 133.9, 133.0, 132.9, 132.7, 130.2, 128.1, 125.9, 117.3, 41.3. HRMS (ESI-TOF)  $m/z$ :  $[\text{M}+\text{Na}]^+$  calcd for  $\text{C}_{14}\text{H}_9\text{Br}_2\text{NSNa}$  403.8715; found 403.8719.

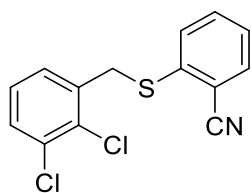

**2-((2,3-dichlorobenzyl)thio)benzonitrile (5f)**

This compound was prepared according to the general procedure, white solid, 2.09 g, 71%.  $^1\text{H}$  NMR (400 MHz,  $\text{CDCl}_3$ )  $\delta$  7.65 (dd,  $J = 7.6, 1.2$  Hz, 1H), 7.46 (td,  $J = 8.0, 1.6$  Hz, 1H), 7.39-7.31 (m, 3H), 7.15 (dd,  $J = 7.6, 1.6$  Hz, 1H), 7.10 (t,  $J = 7.6$  Hz, 1H), 4.34 (s, 2H).  $^{13}\text{C}\{^1\text{H}\}$  NMR (100 MHz,  $\text{CDCl}_3$ )  $\delta$  139.6, 136.5, 133.9, 133.7, 133.0, 132.7, 132.2, 129.9, 128.9, 127.6, 127.4, 117.2, 115.8, 37.7. HRMS (ESI-TOF)  $m/z$ :  $[\text{M}+\text{Na}]^+$  calcd for  $\text{C}_{14}\text{H}_9\text{SNCl}_2\text{Na}$  315.9725; found 315.9717.

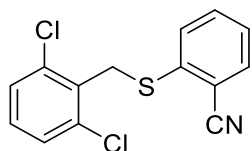

**2-((2,6-dichlorobenzyl)thio)benzonitrile (5g)**

This compound was prepared according to the general procedure, white solid, 1.77 g, 60%.  $^1\text{H}$  NMR (400 MHz,  $\text{CDCl}_3$ )  $\delta$  7.65 (d,  $J = 7.6$  Hz, 1H), 7.49-7.47 (m, 2H), 7.39-7.35 (m, 1H), 7.29-7.27 (m, 2H), 7.15 (dd,  $J = 8.4, 7.2$  Hz, 1H), 4.47 (s, 2H).  $^{13}\text{C}\{^1\text{H}\}$  NMR (100 MHz,  $\text{CDCl}_3$ )  $\delta$  139.2, 136.0, 133.9, 133.8, 133.0, 132.9, 129.3, 128.5, 128.1, 117.2 (two peaks), 35.5. HRMS (ESI-TOF)  $m/z$ :  $[\text{M}+\text{Na}]^+$  calcd for  $\text{C}_{14}\text{H}_9\text{Cl}_2\text{NSNa}$  315.9725; found 315.9734.

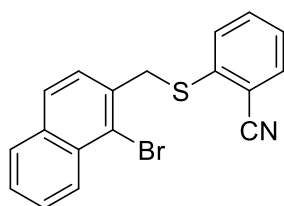

**2-(((1-bromonaphthalen-2-yl)methyl)thio)benzonitrile (5i)**

This compound was prepared according to the general procedure, light yellow solid, 1.64 g, 46%.  $^1\text{H}$  NMR (400 MHz,  $\text{CDCl}_3$ )  $\delta$  8.28 (d,  $J = 8.8$  Hz, 1H), 7.79 (d,  $J = 8.0$  Hz, 1H), 7.72 (d,  $J = 8.4$

Hz, 1H), 7.62 (dd,  $J = 8.0, 0.8$  Hz, 1H), 7.58 (dd,  $J = 8.4, 1.2$  Hz, 1H), 7.51 (td,  $J = 8.0, 1.2$  Hz, 1H), 7.44 (d,  $J = 8.4$  Hz, 1H), 7.40-7.36 (m, 2H), 7.30-7.26 (m, 1H), 4.58 (s, 2H).  $^{13}\text{C}\{^1\text{H}\}$  NMR (100 MHz,  $\text{CDCl}_3$ )  $\delta$  140.1, 133.9 (two peaks), 133.8, 132.9, 132.5, 132.0, 128.3, 128.1, 127.8, 127.7, 127.3, 126.9, 124.9, 117.3, 115.6, 40.6. HRMS (ESI-TOF)  $m/z$ :  $[\text{M}+\text{Na}]^+$  calcd for  $\text{C}_{18}\text{H}_{12}\text{NSBrNa}$  375.9766; found 375.9762.

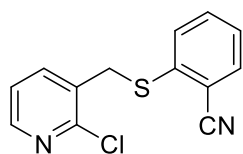

**2-(((2-chloropyridin-3-yl)methyl)thio)benzonitrile (51)**

This compound was prepared according to the general procedure, yellow solid, 2.19 g, 84%.  $^1\text{H}$  NMR (400 MHz,  $\text{CDCl}_3$ )  $\delta$  8.28 (dd,  $J = 8.4, 1.6$  Hz, 1H), 7.65-7.62 (m, 2H), 7.46 (td,  $J = 8.0, 1.2$  Hz, 1H), 7.36-7.31 (m, 2H), 7.08 (dd,  $J = 7.6, 4.8$  Hz, 1H), 4.29 (s, 2H).  $^{13}\text{C}\{^1\text{H}\}$  NMR (100 MHz,  $\text{CDCl}_3$ )  $\delta$  151.2, 148.8, 139.3, 138.9, 134.0, 132.2, 131.2, 127.8, 122.8, 117.1, 115.8, 36.2. HRMS (ESI-TOF)  $m/z$ :  $[\text{M}+\text{H}]^+$  calcd for  $\text{C}_{13}\text{H}_{10}\text{ClN}_2\text{S}$  261.0248; found 261.0241.

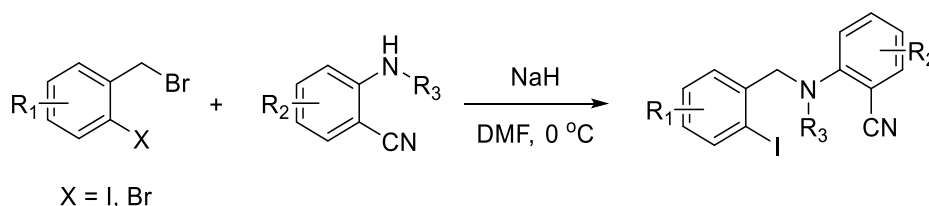

In a 100 mL round bottom flask equipped with a Teflon-coated stir bar and charged with a solution of aniline (5.5 mmol) in DMF (20 mL) was added NaH (5.5 mmol) in one portion at 0 °C. The resulting mixture was stirred vigorously under nitrogen atmosphere until the evolution of gas ceased. Subsequently, a solution of Benzyl bromide (5.0 mmol) in DMF (8 mL) was added dropwise at 0 °C. The resulting reaction mixture was monitored by TLC. The reaction was quenched with cold water (40 mL), and then transferred to a separatory funnel with EtOAc (100 mL). The aqueous layer was separated and extracted with EtOAc (2 x 100 mL). The combined organic extract was washed with brine, dried over anhydrous sodium sulfate, concentrated under reduced pressure. The crude material was purified by silica gel chromatography ((EtOAc/ $\text{CH}_2\text{Cl}_2$ /petroleum ether as eluent) to give the product.

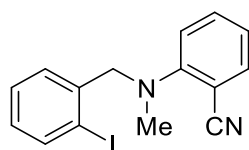

**2-((2-iodobenzyl)(methyl)amino)benzonitrile (7a)**

This compound was prepared according to the general procedure, light yellow solid, 2.02 g, 58%. <sup>1</sup>H NMR (400 MHz, CDCl<sub>3</sub>) δ 7.86-7.84 (m, 1H), 7.53 (dd, *J* = 8.0, 2.0 Hz, 1H), 7.41-7.31 (m, 3H), 7.00-6.96 (m, 1H), 6.89-6.85 (m, 2H), 4.48 (s, 2H), 3.07 (s, 3H). <sup>13</sup>C{<sup>1</sup>H} NMR (100 MHz, CDCl<sub>3</sub>) δ 154.4, 139.7, 139.1, 135.2, 133.6, 129.2, 128.6, 128.5, 119.8, 119.4, 117.9, 101.5, 98.7, 64.1, 40.8. HRMS (ESI-TOF) *m/z*: [M+H]<sup>+</sup> calcd for C<sub>15</sub>H<sub>14</sub>N<sub>2</sub>I 349.0196; found 349.0193.

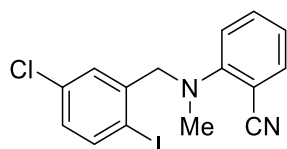

**2-((5-chloro-2-iodobenzyl)(methyl)amino)benzonitrile (7b)**

This compound was prepared according to the general procedure, white solid, 497 mg, 26%. <sup>1</sup>H NMR (400 MHz, CDCl<sub>3</sub>) δ 7.76 (d, *J* = 8.4 Hz, 1H), 7.57-7.54 (m, 1H), 7.45-7.41 (m, 1H), 7.37 (d, *J* = 2.4 Hz, 1H), 7.00 (dd, *J* = 8.4, 2.4 Hz, 1H), 6.94-6.90 (m, 2H), 4.44 (s, 2H), 3.05 (s, 3H). <sup>13</sup>C{<sup>1</sup>H} NMR (100 MHz, CDCl<sub>3</sub>) δ 154.2, 141.3, 140.7, 135.3, 135.2, 133.8, 129.5, 128.6, 120.3, 119.2, 117.8, 101.7, 95.4, 64.4, 40.6. HRMS (ESI-TOF) *m/z*: [M+H]<sup>+</sup> calcd for C<sub>15</sub>H<sub>13</sub>N<sub>2</sub>ClI 382.9806; found 382.9805.

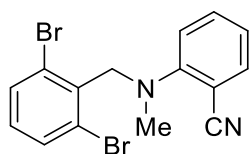

**2-((2,6-dibromobenzyl)(methyl)amino)benzonitrile (7c)**

This compound was prepared according to the general procedure, yellow solid, 1.46 g, 77%. <sup>1</sup>H NMR (400 MHz, CDCl<sub>3</sub>) δ 7.57-7.52 (m, 3H), 7.47-7.42 (m, 1H), 7.04-7.00 (m, 2H), 6.91 (td, *J* = 7.6, 1.2 Hz, 1H), 4.81 (s, 2H), 2.88 (s, 3H). <sup>13</sup>C{<sup>1</sup>H} NMR (100 MHz, CDCl<sub>3</sub>) δ 156.0, 135.4, 134.8, 133.4, 132.8, 130.3, 126.9, 120.2, 119.4, 118.9, 102.9, 57.5, 39.7. HRMS (ESI-TOF) *m/z*: [M+H]<sup>+</sup> calcd for C<sub>15</sub>H<sub>13</sub>Br<sub>2</sub>N<sub>2</sub> 378.9440; found 378.9445.

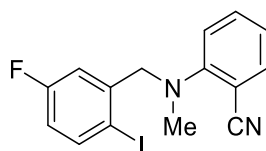

**2-((5-fluoro-2-iodobenzyl)(methyl)amino)benzonitrile (7d)**

This compound was prepared according to the general procedure, white solid, 1.39 g, 76%. <sup>1</sup>H NMR (400 MHz, CDCl<sub>3</sub>) δ 7.79 (dd, *J* = 8.4, 5.2 Hz, 1H), 7.55 (dd, *J* = 8.0, 1.6 Hz, 1H), 7.45-7.40 (m, 1H), 7.16 (dd, *J* = 10.0, 3.2 Hz, 1H), 6.93-6.90 (m, 2H), 6.77 (td, *J* = 8.4, 3.2 Hz, 1H), 4.44 (s, 2H), 3.06 (s, 3H). <sup>13</sup>C{<sup>1</sup>H} NMR (100 MHz, CDCl<sub>3</sub>) δ 164.0 (d, *J* = 246.3 Hz), 154.2, 141.8 (d, *J* = 6.7 Hz), 140.7 (d, *J* = 7.6 Hz), 135.3, 133.8, 120.3, 119.2, 117.8, 116.6 (d, *J* = 21.9 Hz), 115.9 (d, *J* = 23.5 Hz), 101.7, 90.8 (d, *J* = 2.0 Hz), 64.4, 40.6. HRMS (ESI-TOF) *m/z*: [M+H]<sup>+</sup> calcd for C<sub>15</sub>H<sub>13</sub>FIN<sub>2</sub> 367.0102; found 367.0107.

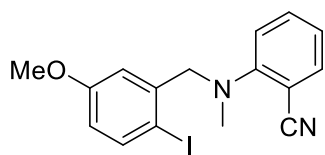

**2-((2-iodo-5-methoxybenzyl)(methyl)amino)benzonitrile (7e)**

This compound was prepared according to the general procedure, white solid, 1.44 g, 76%.  $^1\text{H}$  NMR (400 MHz,  $\text{CDCl}_3$ )  $\delta$  7.70 (d,  $J = 8.4$  Hz, 1H), 7.54 (dd,  $J = 7.6, 1.6$  Hz, 1H), 7.43-7.39 (m, 1H), 7.05 (d,  $J = 3.2$  Hz, 1H), 6.93-6.88 (m, 2H), 6.60 (dd,  $J = 8.4, 2.8$  Hz, 1H), 4.44 (s, 2H), 3.76 (s, 3H), 3.06 (s, 3H).  $^{13}\text{C}\{^1\text{H}\}$  NMR (100 MHz,  $\text{CDCl}_3$ )  $\delta$  160.4, 154.6, 140.2, 140.1, 135.2, 133.7, 120.1, 119.4, 118.1, 115.3, 114.6, 101.9, 86.8, 64.2, 55.5, 40.9. HRMS (ESI-TOF)  $m/z$ :  $[\text{M}+\text{Na}]^+$  calcd for  $\text{C}_{16}\text{H}_{15}\text{IN}_2\text{NaO}$  401.0121; found 401.0127.

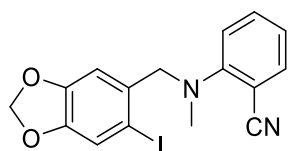

**2-(((6-iodobenzo[d][1,3]dioxol-5-yl)methyl)(methyl)amino)benzonitrile (7f)**

This compound was prepared according to the general procedure, white solid, 1.04 g, 53%.  $^1\text{H}$  NMR (400 MHz,  $\text{CDCl}_3$ )  $\delta$  7.54 (dd,  $J = 8.0, 1.6$  Hz, 1H), 7.41 (ddd,  $J = 8.8, 7.6, 1.6$  Hz, 1H), 7.27 (s, 1H), 6.93 (s, 1H), 6.92-6.88 (m, 2H), 5.97 (s, 2H), 4.40 (s, 2H), 3.02 (s, 3H).  $^{13}\text{C}\{^1\text{H}\}$  NMR (100 MHz,  $\text{CDCl}_3$ )  $\delta$  154.5, 148.9, 148.0, 135.2, 133.7, 132.7, 120.1, 119.4, 118.9, 118.0, 108.9, 101.9, 101.8, 86.3, 64.2, 40.5. HRMS (ESI-TOF)  $m/z$ :  $[\text{M}+\text{H}]^+$  calcd for  $\text{C}_{16}\text{H}_{14}\text{N}_2\text{O}_2\text{I}$  393.0100; found 393.0096.

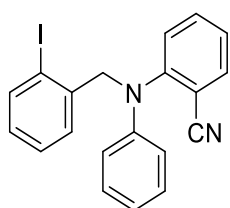

**2-((2-iodobenzyl)(phenyl)amino)benzonitrile (7g)**

This compound was prepared according to the general procedure, white solid, 1.66 g, 81%.  $^1\text{H}$  NMR (400 MHz,  $\text{CDCl}_3$ )  $\delta$  7.83 (dd,  $J = 8.0, 1.2$  Hz, 1H), 7.62 (dd,  $J = 7.6, 1.6$  Hz, 1H), 7.55-7.50 (m, 2H), 7.30-7.14 (m, 5H), 6.96-6.93 (m, 2H), 6.81 (dd,  $J = 7.6, 0.8$  Hz, 2H), 4.96 (s, 2H).  $^{13}\text{C}\{^1\text{H}\}$  NMR (100 MHz,  $\text{CDCl}_3$ )  $\delta$  150.8, 147.8, 139.5, 139.1, 134.9, 134.3, 129.5, 129.1, 128.6, 128.3, 126.1, 124.5, 121.8, 118.6, 117.5, 109.8, 97.5, 62.9. HRMS (ESI-TOF)  $m/z$ :  $[\text{M}+\text{H}]^+$  calcd for  $\text{C}_{20}\text{H}_{16}\text{IN}_2$  411.0353; found 411.0358.



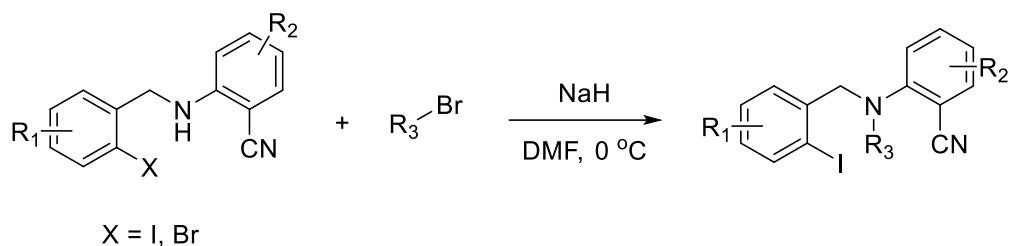

In a 100 mL round bottom flask equipped with a Teflon-coated stir bar and charged with a solution of aniline (5.5 mmol) in DMF (20 mL) was added NaH (5.5 mmol) in one portion at 0 °C. The resulting mixture was stirred vigorously under nitrogen atmosphere until the evolution of gas ceased. Subsequently, a solution of Benzyl bromide (5.0 mmol) in DMF (8 mL) was added dropwise at 0 °C. Upon the completion of S<sub>N</sub>2 reaction as judged by TLC analysis, which was ~1 h. The reaction was quenched with cold water (40 mL), and then transferred to a separatory funnel with EtOAc (100 mL). The aqueous layer was separated and extracted with EtOAc (2 x 100 mL). The combined organic extract was washed with brine, dried over anhydrous sodium sulfate, concentrated under reduced pressure. The crude material was purified by silica gel chromatography ((EtOAc/CH<sub>2</sub>Cl<sub>2</sub>/petroleum ether as eluent) to give the product.

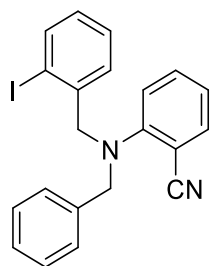

**2-(benzyl(2-iodobenzyl)amino)benzonitrile (7h)**

This compound was prepared according to the general procedure, white solid, 1.63 g, 77%. <sup>1</sup>H NMR (400 MHz, CDCl<sub>3</sub>) δ 7.80 (dd, *J* = 7.6, 0.8 Hz, 1H), 7.57 (dd, *J* = 8.0, 1.6 Hz, 1H), 7.46-7.44 (m, 1H), 7.37-7.33 (m, 1H), 7.32-7.24 (m, 6H), 6.96-6.91 (m, 3H), 4.56 (s, 2H), 4.43 (s, 2H). <sup>13</sup>C{<sup>1</sup>H} NMR (100 MHz, CDCl<sub>3</sub>) δ 153.5, 139.7, 139.2, 137.0, 135.1, 133.5, 129.3, 129.2, 128.7, 128.5, 128.2, 127.6, 121.5, 120.8, 119.0, 104.9, 99.1, 60.6, 57.6. HRMS (ESI-TOF) *m/z*: [M+Na]<sup>+</sup> calcd for C<sub>21</sub>H<sub>17</sub>IN<sub>2</sub>Na 447.0329; found 447.0334.

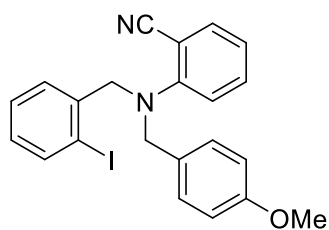

**2-((2-iodobenzyl)(4-methoxybenzyl)amino)benzonitrile (7i)**

This compound was prepared according to the general procedure, light green oil, 1.82 g, 80%.  $^1\text{H}$  NMR (400 MHz,  $\text{DMSO-}d_6$ )  $\delta$  7.84 (d,  $J = 8.0$  Hz, 1H), 7.67 (dd,  $J = 8.0, 1.6$  Hz, 1H), 7.46 (td,  $J = 8.4, 1.6$  Hz, 1H), 7.41-7.34 (m, 2H), 7.19 (d,  $J = 8.8$  Hz, 2H), 7.04-6.99 (m, 3H), 6.87 (d,  $J = 8.8$  Hz, 2H), 4.48 (s, 2H), 4.39 (s, 2H), 3.71 (s, 3H).  $^{13}\text{C}\{^1\text{H}\}$  NMR (100 MHz,  $\text{DMSO-}d_6$ )  $\delta$  158.5, 152.6, 139.4, 139.2, 134.8, 133.8, 129.2 (two peaks), 128.9, 128.8, 121.6, 120.8, 118.7, 113.8, 104.0, 99.4, 59.9, 56.3, 55.0. HRMS (ESI-TOF)  $m/z$ :  $[\text{M}+\text{Na}]^+$  calcd for  $\text{C}_{22}\text{H}_{19}\text{N}_2\text{ONa}$  477.0434; found 477.0441.

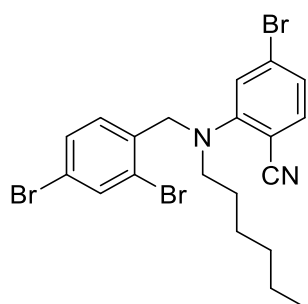

**4-bromo-2-((2,4-dibromobenzyl)(hexyl)amino)benzonitrile (7j)**

This compound was prepared according to the general procedure, white solid, 0.93 g, 35%.  $^1\text{H}$  NMR (400 MHz,  $\text{CDCl}_3$ )  $\delta$  7.73 (d,  $J = 2.0$  Hz, 1H), 7.41 (dd,  $J = 8.4, 2.0$  Hz, 1H), 7.37 (d,  $J = 8.8$  Hz, 1H), 7.21 (d,  $J = 8.4$  Hz, 1H), 7.03-7.00 (m, 2H), 4.50 (s, 2H), 3.38-3.34 (m, 2H), 1.65-1.60 (m, 2H), 1.33-1.27 (m, 6H), 0.90-0.83 (m, 3H).  $^{13}\text{C}\{^1\text{H}\}$  NMR (100 MHz,  $\text{CDCl}_3$ )  $\delta$  153.7, 136.3, 135.5, 135.4, 131.0, 130.3, 128.7, 123.9, 123.5, 122.1, 121.8, 101.2, 55.9, 53.2, 31.6, 27.5, 26.5, 22.7, 14.1. HRMS (ESI-TOF)  $m/z$ :  $[\text{M}+\text{H}]^+$  calcd for  $\text{C}_{20}\text{H}_{22}\text{N}_2\text{Br}_3$  526.9333; found 526.9340.

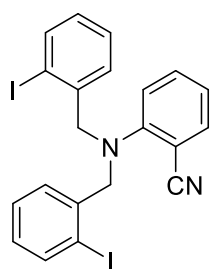

**2-(bis(2-iodobenzyl)amino)benzonitrile (7k)**

This compound was prepared according to the general procedure, white solid, 1.98 g, 72%.  $^1\text{H}$  NMR (400 MHz,  $\text{CDCl}_3$ )  $\delta$  7.84 (dd,  $J = 7.6, 0.8$  Hz, 2H), 7.57 (dd,  $J = 8.0, 1.6$  Hz, 1H), 7.42-7.28 (m, 5H), 7.00-6.91 (m, 3H), 6.87 (d,  $J = 8.4$  Hz, 1H), 4.56 (s, 4H).  $^{13}\text{C}\{^1\text{H}\}$  NMR (100 MHz,  $\text{CDCl}_3$ )  $\delta$  152.8, 139.8, 138.9, 135.4, 133.7, 129.3, 128.6, 128.1, 121.0, 119.6, 119.0, 102.9, 98.8, 61.7. HRMS (ESI-TOF)  $m/z$ :  $[\text{M}+\text{H}]^+$  calcd for  $\text{C}_{21}\text{H}_{17}\text{I}_2\text{N}_2$  550.9476; found 550.9481.

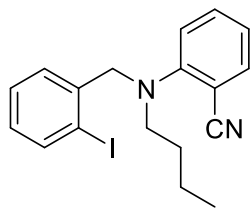

**2-(butyl(2-iodobenzyl)amino)benzonitrile (7l)**

This compound was prepared according to the general procedure, yellow oil, 1.6 g, 82%.  $^1\text{H}$  NMR (400 MHz,  $\text{CDCl}_3$ )  $\delta$  7.84 (d,  $J = 7.6$  Hz, 1H), 7.54 (dd,  $J = 7.6, 1.6$  Hz, 1H), 7.38-7.28 (m, 3H), 6.96 (td,  $J = 8.0, 2.0$  Hz, 1H), 6.88-6.83 (m, 2H), 4.46 (s, 2H), 3.43 (t,  $J = 8.0$  Hz, 2H), 1.67-1.62 (m, 2H), 136-1.30 (m, 2H), 0.91 (t,  $J = 7.6$  Hz, 3H).  $^{13}\text{C}\{^1\text{H}\}$  NMR (100 MHz,  $\text{CDCl}_3$ )  $\delta$  153.1, 139.7, 139.3, 135.4, 133.5, 129.1, 128.8, 128.5, 120.0, 119.5, 119.2, 102.5, 98.7, 61.2, 53.2, 29.9, 20.1, 14.1. HRMS (ESI-TOF)  $m/z$ :  $[\text{M}+\text{H}]^+$  calcd for  $\text{C}_{18}\text{H}_{20}\text{IN}_2$  391.0666; found 391.0682.

### 2.3. General Procedure for Synthesis of Indoles

**procedure 1:** The Schlenk tube charged with **3/5/7** (0.5 mmol),  $t\text{BuOK}$  (1.1 mmol, 124 mg) and  $\text{CuSO}_4$  (0.025 mmol, 4 mg) was dried under high vacuum for 15 min.  $\text{PhCl}$  (10 mL) was added under argon and stirred at 90 °C. The resulting reaction mixture was monitored by TLC. Upon completion of a starting materials, the reaction mixture was directly purified by silica gel column to give the desired product.

**procedure 2:** The Schlenk tube charged with **12/13** (0.6 mmol),  $\text{K}_2\text{CO}_3$  (0.5 mmol) and  $\text{CuSO}_4$  (0.05 mmol, 8 mg) was dried under high vacuum for 15 min. **1** (0.5 mmol) and DMF (10 mL) were added under argon. 10 min later,  $t\text{BuOK}$  (1.1 mmol, 124 mg) was added under argon and stirred at 90 °C. The resulting reaction mixture was monitored by TLC. Upon completion of a starting materials, the reaction mixture was directly purified by silica gel column to give the desired product.

**procedure 3:** The Schlenk tube charged with **14** (0.6 mmol) and  $\text{CuSO}_4$  (0.05 mmol, 8 mg) was dried under high vacuum for 15 min. **1** and DMF (10 mL) were added under argon at 0 °C. Then  $\text{KHMDS}$  (0.6 mmol) was added. 1h later,  $t\text{BuOK}$  (1.1 mmol, 124 mg) was added under argon and stirred at 90 °C. The resulting reaction mixture was monitored by TLC. Upon completion of a starting materials, the reaction mixture was directly purified by silica gel column to give the desired product.

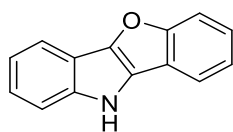

**10H-benzofuro[3,2-b]indole (4a)**

This compound was prepared according to the general procedure 1, white solid, X = Br, 79.6 mg, 77%. X = I, 101.6 mg, 98%. The general procedure 2, 85.8 mg, 83%.  $^1\text{H}$  NMR (400 MHz,  $\text{CDCl}_3$ )  $\delta$  8.01 (s, 1H), 7.83 (d,  $J = 7.6$  Hz, 1H), 7.66-7.61 (m, 2H), 7.45 (d,  $J = 8.4$  Hz, 1H), 7.34-7.21 (m, 4H).  $^{13}\text{C}\{^1\text{H}\}$  NMR (100 MHz,  $\text{CDCl}_3$ )  $\delta$  159.3, 143.8, 139.8, 125.3, 124.0, 123.0, 122.8, 120.5, 118.8, 118.0, 117.3, 114.4, 112.9, 112.7. HRMS (ESI-TOF)  $m/z$ :  $[\text{M}+\text{H}]^+$  calcd for  $\text{C}_{14}\text{H}_{10}\text{NO}$  208.0757; found 208.0757.

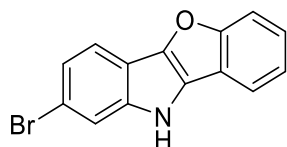

**2-bromo-10H-benzofuro[3,2-b]indole (4b)**

This compound was prepared according to the general procedure 1, white solid, 114.3 mg, 80%.  $^1\text{H}$  NMR (400 MHz,  $\text{DMSO}-d_6$ )  $\delta$  11.70 (s, 1H), 7.84-7.81 (m, 1H), 7.78 (d,  $J = 1.6$  Hz, 1H), 7.74-7.70 (m, 2H), 7.40-7.35 (m, 2H), 7.28 (dd,  $J = 8.4, 1.6$  Hz, 1H).  $^{13}\text{C}\{^1\text{H}\}$  NMR (100 MHz,  $\text{DMSO}-d_6$ )  $\delta$  158.8, 141.5, 139.8, 126.2, 124.4, 123.1, 122.4, 118.6, 118.3, 118.0, 115.6, 114.8, 112.7, 111.7. HRMS (ESI-TOF)  $m/z$ :  $[\text{M}+\text{Na}]^+$  calcd for  $\text{C}_{14}\text{H}_8\text{NONaBr}$  307.9681; found 307.9679.

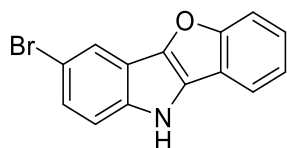

**3-bromo-10H-benzofuro[3,2-b]indole (4c)**

This compound was prepared according to the general procedure 1, yellow solid, 118.7 mg, 83%. The general procedure 2, 114.2 mg, 80%.  $^1\text{H}$  NMR (400 MHz,  $\text{CDCl}_3$ )  $\delta$  8.10 (s, 1H), 7.95-7.94 (m, 1H), 7.68-7.66 (m, 1H), 7.63-7.61 (m, 1H), 7.37-7.29 (m, 4H).  $^{13}\text{C}\{^1\text{H}\}$  NMR (100 MHz,  $\text{CDCl}_3$ )  $\delta$  159.5, 142.6, 138.2, 126.5, 125.8, 124.6, 123.0, 119.9, 118.5, 118.2, 115.7, 114.0, 113.5, 113.0. HRMS (ESI-TOF)  $m/z$ :  $[\text{M}+\text{H}]^+$  calcd for  $\text{C}_{14}\text{H}_9\text{BrNO}$  285.9862; found 285.9852.

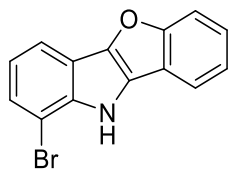

**1-bromo-10H-benzofuro[3,2-b]indole (4d)**

This compound was prepared according to the general procedure 1, white solid, 129.9 mg, 86%.  $^1\text{H}$  NMR (400 MHz,  $\text{CDCl}_3$ )  $\delta$  8.25 (s, 1H), 7.77 (d,  $J = 8.0$  Hz, 1H), 7.70-7.67 (m, 1H), 7.64-7.62 (m, 1H), 7.44 (dd,  $J = 7.6, 0.8$  Hz, 1H), 7.38-7.31 (m, 2H), 7.11 (t,  $J = 7.6$  Hz, 1H).  $^{13}\text{C}\{^1\text{H}\}$  NMR (100 MHz,  $\text{CDCl}_3$ )  $\delta$  159.3, 143.7, 137.5, 125.6, 125.1, 124.5, 123.0, 121.3, 118.4, 118.2, 116.4, 115.5, 112.9, 105.9. HRMS (ESI-TOF)  $m/z$ :  $[\text{M}+\text{H}]^+$  calcd for  $\text{C}_{14}\text{H}_9\text{NOBr}$  285.9862; found 285.9852.

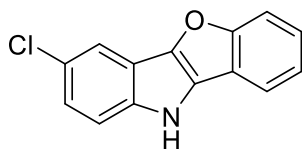

**3-chloro-10H-benzofuro[3,2-b]indole (4e)**

This compound was prepared according to the general procedure 1, light yellow solid, 102.8 mg, 86%. The general procedure 2, 92.8 mg, 77%  $^1\text{H}$  NMR (400 MHz,  $\text{CDCl}_3$ )  $\delta$  8.08 (s, 1H), 7.79 (d,  $J = 2.0$  Hz, 1H), 7.67 (dd,  $J = 7.2, 2.0$  Hz, 1H), 7.62 (dd,  $J = 7.6, 1.2$  Hz, 1H), 7.37 (d,  $J = 8.8$  Hz, 1H), 7.35-7.29 (m, 2H), 7.21 (dd,  $J = 8.8, 2.4$  Hz, 1H).  $^{13}\text{C}\{^1\text{H}\}$  NMR (100 MHz,  $\text{CDCl}_3$ )  $\delta$  159.5, 142.8, 138.0, 126.7, 126.2, 124.6, 123.2, 123.0, 118.5, 118.2, 116.8, 115.1, 113.6, 113.0. HRMS (ESI-TOF)  $m/z$ :  $[\text{M}+\text{H}]^+$  calcd for  $\text{C}_{14}\text{H}_9\text{NOCl}$  242.0373; found 242.0365.

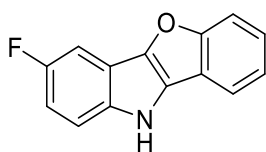

**3-fluoro-10H-benzofuro[3,2-b]indole (4f)**

This compound was prepared according to the general procedure 1, yellow solid, 101.2 mg, 90%. The general procedure 2, 78.8 mg, 70%  $^1\text{H}$  NMR (400 MHz,  $\text{DMSO}-d_6$ )  $\delta$  11.67 (s, 1H), 7.89-7.84 (m, 1H), 7.77-7.71 (m, 1H), 7.62-7.58 (m, 2H), 7.44-7.37 (m, 2H), 7.12 (td,  $J = 9.2, 2.4$  Hz, 1H).  $^{13}\text{C}\{^1\text{H}\}$  NMR (100 MHz,  $\text{DMSO}-d_6$ )  $\delta$  158.8, 156.9 (d,  $J = 231.5$  Hz), 141.7 (d,  $J = 4.4$  Hz), 135.9, 127.3, 124.5, 123.0, 118.6, 118.3, 114.1 (d,  $J = 9.6$  Hz), 112.6, 112.4 (d,  $J = 10.9$  Hz), 110.3 (d,  $J = 26.0$  Hz), 101.5 (d,  $J = 25.1$  Hz). HRMS (ESI-TOF)  $m/z$ :  $[\text{M}+\text{H}]^+$  calcd for  $\text{C}_{14}\text{H}_9\text{NOF}$  226.0663; found 226.0663.

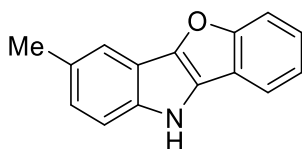

**3-methyl-10H-benzofuro[3,2-b]indole (4g)**

This compound was prepared according to the general procedure 1, white solid, 79.8 mg, 72%.  $^1\text{H}$  NMR (400 MHz,  $\text{CDCl}_3$ )  $\delta$  7.92 (s, 1H), 7.67-7.59 (m, 3H), 7.35 (d,  $J = 8.4$  Hz, 1H), 7.33-7.27 (m, 2H), 7.10 (ddd,  $J = 8.4, 1.6, 0.4$  Hz, 1H), 2.51 (s, 3H).  $^{13}\text{C}\{^1\text{H}\}$  NMR (100 MHz,  $\text{CDCl}_3$ )  $\delta$  159.3, 143.7, 138.3, 129.9, 125.5, 124.6, 123.8, 122.7, 119.0, 117.9, 117.0, 114.6, 112.8, 112.3, 21.6. HRMS (ESI-TOF)  $m/z$ :  $[\text{M}+\text{H}]^+$  calcd for  $\text{C}_{15}\text{H}_{12}\text{NO}$  222.0913; found 222.0908.

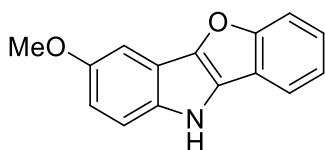

**3-methoxy-10H-benzofuro[3,2-b]indole (4h)**

This compound was prepared according to the general procedure 1, white solid, 101.5 mg, 86%.  $^1\text{H}$  NMR (400 MHz,  $\text{DMSO}-d_6$ )  $\delta$  11.33 (s, 1H), 7.79-7.78 (m, 1H), 7.71-7.68 (m, 1H), 7.47 (d,  $J = 8.8$  Hz, 1H), 7.38-7.33 (m, 2H), 7.27 (d,  $J = 2.4$  Hz, 1H), 6.89 (dd,  $J = 8.8, 2.4$  Hz, 1H), 3.84 (s, 3H).  $^{13}\text{C}\{^1\text{H}\}$  NMR (100 MHz,  $\text{DMSO}-d_6$ )  $\delta$  158.6, 153.5, 142.0, 134.5, 126.0, 123.9, 122.9, 118.6, 118.3, 113.8, 112.7, 112.5, 112.4, 98.3, 55.5. HRMS (ESI-TOF)  $m/z$ :  $[\text{M}+\text{H}]^+$  calcd for  $\text{C}_{15}\text{H}_{12}\text{NO}_2$  238.0863; found 238.0869.

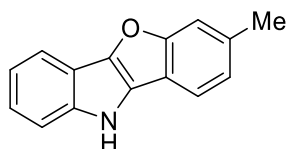

**7-methyl-10H-benzofuro[3,2-b]indole (4i)**

This compound was prepared according to the general procedure 1, white solid, 107.6 mg, 97%. The general procedure 2, 94.0 mg, 85%  $^1\text{H}$  NMR (400 MHz,  $\text{CDCl}_3$ )  $\delta$  8.00 (s, 1H), 7.81 (d,  $J = 7.6$  Hz, 1H), 7.53 (d,  $J = 8.0$  Hz, 1H), 7.46-7.43 (m, 2H), 7.28-7.20 (m, 2H), 7.12 (d,  $J = 7.6$  Hz, 1H), 2.52 (s, 3H).  $^{13}\text{C}\{^1\text{H}\}$  NMR (100 MHz,  $\text{CDCl}_3$ )  $\delta$  159.8, 143.4, 139.5, 134.4, 125.4, 124.0, 122.6, 120.4, 117.5, 117.0, 116.4, 114.6, 113.2, 112.6, 21.9. HRMS (ESI-TOF)  $m/z$ :  $[\text{M}+\text{H}]^+$  calcd for  $\text{C}_{15}\text{H}_{12}\text{NO}$  222.0913; found 222.0909

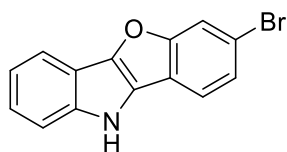

**7-bromo-10H-benzofuro[3,2-b]indole (4j)**

This compound was prepared according to the general procedure 1, white solid, 97.4 mg, 68%. The general procedure 2, 94.4 mg, 66%  $^1\text{H}$  NMR (400 MHz,  $\text{DMSO}-d_6$ )  $\delta$  11.56 (s, 1H), 7.99 (d,  $J = 1.6$  Hz, 1H), 7.78-7.73 (m, 2H), 7.58 (d,  $J = 8.0$  Hz, 1H), 7.52 (dd,  $J = 8.4, 1.6$  Hz, 1H), 7.26 (t,  $J = 7.2$  Hz, 1H), 7.16 (t,  $J = 7.6$  Hz, 1H).  $^{13}\text{C}\{^1\text{H}\}$  NMR (100 MHz,  $\text{DMSO}-d_6$ )  $\delta$  158.7, 142.7, 139.5, 126.0, 124.7, 122.8, 119.7, 119.5, 117.8, 116.5, 116.0, 115.7, 113.2, 112.5. HRMS (ESI-TOF)  $m/z$ :  $[\text{M}+\text{H}]^+$  calcd for  $\text{C}_{14}\text{H}_9\text{BrNO}$  285.9862; found 285.9855.

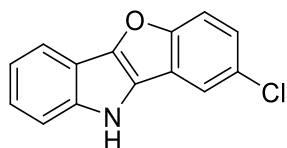

**8-chloro-10H-benzofuro[3,2-b]indole (4k)**

This compound was prepared according to the general procedure 1, white solid, 84.4 mg, 70%.  $^1\text{H}$  NMR (400 MHz,  $\text{CDCl}_3$ )  $\delta$  8.07 (s, 1H), 7.82 (d,  $J = 8.0$  Hz, 1H), 7.63 (d,  $J = 2.0$  Hz, 1H), 7.52 (d,  $J = 8.8$  Hz, 1H), 7.48 (d,  $J = 8.0$  Hz, 1H), 7.33-7.22 (m, 3H).  $^{13}\text{C}\{^1\text{H}\}$  NMR (100 MHz,  $\text{CDCl}_3$ )  $\delta$  157.6, 145.2, 140.1, 128.3, 124.3, 123.8, 123.7, 120.7, 119.9, 117.7, 117.5, 114.2, 113.7, 112.8. HRMS (ESI-TOF)  $m/z$ :  $[\text{M}+\text{H}]^+$  calcd for  $\text{C}_{14}\text{H}_9\text{ClNO}$  242.0367; found 242.0361.

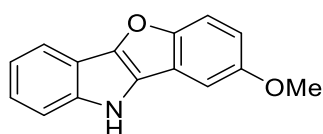

**8-methoxy-10H-benzofuro[3,2-b]indole (4l)**

This compound was prepared according to the general procedure 1, white solid, 99.9 mg, 84%.  $^1\text{H}$  NMR (400 MHz,  $\text{DMSO-}d_6$ )  $\delta$  11.39 (s, 1H), 7.69 (d,  $J = 8.0$  Hz, 1H), 7.65 (d,  $J = 8.4$  Hz, 1H), 7.51 (d,  $J = 8.0$  Hz, 1H), 7.34 (d,  $J = 2.4$  Hz, 1H), 7.18 (td,  $J = 6.8, 1.2$  Hz, 1H), 7.12 (t,  $J = 6.8$  Hz, 1H), 6.98 (dd,  $J = 8.4, 2.0$  Hz, 1H), 3.85 (s, 3H).  $^{13}\text{C}\{^1\text{H}\}$  NMR (100 MHz,  $\text{DMSO-}d_6$ )  $\delta$  159.8, 157.3, 141.3, 138.6, 125.5, 121.5, 119.4, 118.5, 115.7, 113.1, 112.9, 112.1, 111.0, 98.2, 55.7. HRMS (ESI-TOF)  $m/z$ :  $[\text{M}+\text{H}]^+$  calcd for  $\text{C}_{15}\text{H}_{12}\text{NO}_2$  238.0863; found 238.0858.

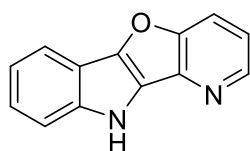

**10H-pyrido[2',3':4,5]furo[3,2-b]indole (4m)**

This compound was prepared according to the general procedure 1, light orange solid, 62.5 g, 60%.  $^1\text{H}$  NMR (400 MHz,  $\text{DMSO-}d_6$ )  $\delta$  11.90 (s, 1H), 8.53 (dd,  $J = 4.8, 1.2$  Hz, 1H), 8.11 (dd,  $J = 8.4, 1.2$  Hz, 1H), 7.83 (d,  $J = 8.0$  Hz, 1H), 7.56 (d,  $J = 8.0$  Hz, 1H), 7.37 (dd,  $J = 8.4, 5.2$  Hz, 1H), 7.32 (td,  $J = 6.8, 1.2$  Hz, 1H), 7.22-7.18 (m, 1H).  $^{13}\text{C}\{^1\text{H}\}$  NMR (100 MHz,  $\text{DMSO-}d_6$ )  $\delta$  152.2, 145.5, 144.8, 140.3, 137.6, 123.9, 123.8, 119.8, 119.3, 118.5, 116.9, 113.3, 112.4. HRMS (ESI-TOF)  $m/z$ :  $[\text{M}+\text{H}]^+$  calcd for  $\text{C}_{13}\text{H}_9\text{N}_2\text{O}$  209.0709; found 209.0711.

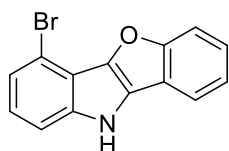

**4-bromo-10H-benzofuro[3,2-b]indole (4n)**

This compound was prepared according to the general procedure 1, brown solid, 114.3mg, 80%.  $^1\text{H}$  NMR (400 MHz,  $\text{DMSO-}d_6$ )  $\delta$  11.89 (s, 1H), 7.85-7.83 (m, 1H), 7.79-7.77 (m, 1H), 7.58 (dd,  $J = 8.0, 0.4$  Hz, 1H), 7.43-7.37 (m, 2H), 7.34 (dd,  $J = 7.2, 0.4$  Hz, 1H), 7.15 (dd,  $J = 8.0, 7.6$  Hz, 1H).  $^{13}\text{C}\{^1\text{H}\}$  NMR (100 MHz,  $\text{DMSO-}d_6$ )  $\delta$  158.8, 140.8, 139.7, 126.5, 124.7, 123.3, 123.1, 122.3, 118.6, 117.9, 113.8, 112.8, 112.3, 109.5. HRMS (ESI-TOF)  $m/z$ :  $[\text{M}+\text{H}]^+$  calcd for  $\text{C}_{14}\text{H}_9\text{NOBr}$  285.9862; found 285.9864.

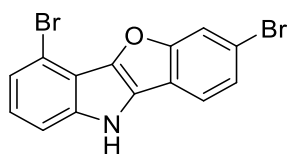

**4,7-dibromo-10H-benzofuro[3,2-b]indole (4o)**

This compound was prepared according to the general procedure 1, yellow solid, 121.7 mg, 66%.  $^1\text{H}$  NMR (400 MHz,  $\text{DMSO}-d_6$ )  $\delta$  11.93 (s, 1H), 8.09 (d,  $J = 1.6$  Hz, 1H), 7.77 (d,  $J = 8.0$  Hz, 1H), 7.60 (d,  $J = 8.4$  Hz, 1H), 7.55 (dd,  $J = 8.0, 1.6$  Hz, 1H), 7.35 (d,  $J = 7.6$  Hz, 1H), 7.17 (t,  $J = 8.0$  Hz, 1H).  $^{13}\text{C}\{^1\text{H}\}$  NMR (100 MHz,  $\text{DMSO}-d_6$ )  $\delta$  158.9, 141.4, 139.9, 126.3, 125.8, 123.7, 122.5, 119.9, 117.2, 116.8, 116.0, 113.7, 112.5, 109.5. HRMS (ESI-TOF)  $m/z$ :  $[\text{M}+\text{Na}]^+$  calcd for  $\text{C}_{14}\text{H}_7\text{Br}_2\text{NONa}$  385.8792; found 385.8790.

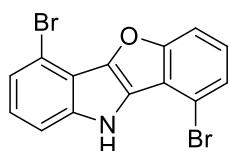

**4,9-dibromo-10H-benzofuro[3,2-b]indole (4p)**

This compound was prepared according to the general procedure 1, white solid, 164.3 mg, 90%.  $^1\text{H}$  NMR (400 MHz,  $\text{DMSO}-d_6$ )  $\delta$  12.03 (s, 1H), 7.79 (dd,  $J = 8.4, 0.8$  Hz, 1H), 7.60 (dd,  $J = 8.4, 0.8$  Hz, 1H), 7.55 (dd,  $J = 8.0, 0.8$  Hz, 1H), 7.35 (dd,  $J = 7.6, 0.4$  Hz, 1H), 7.31 (t,  $J = 8.0$  Hz, 1H), 7.17 (dd,  $J = 8.4, 0.4$  Hz, 1H).  $^{13}\text{C}\{^1\text{H}\}$  NMR (100 MHz,  $\text{DMSO}-d_6$ )  $\delta$  158.4, 141.4, 140.4, 125.9, 125.8, 125.0, 124.0, 122.6, 119.7, 113.3, 112.7, 112.1, 110.7, 109.6. HRMS (ESI-TOF)  $m/z$ :  $[\text{M}+\text{H}]^+$  calcd for  $\text{C}_{14}\text{H}_8\text{Br}_2\text{NO}$  363.8967; found 363.8973.

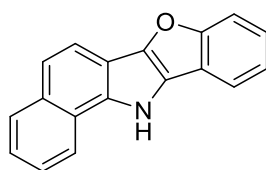

**12H-benzo[g]benzofuro[3,2-b]indole (4q)**

This compound was prepared according to the general procedure 1, white solid, 87.0 mg, 68%.  $^1\text{H}$  NMR (400 MHz,  $\text{DMSO}-d_6$ )  $\delta$  12.51 (s, 1H), 8.47 (d,  $J = 8.4$  Hz, 1H), 7.99 (d,  $J = 8.0$  Hz, 1H), 7.89 (d,  $J = 8.8$  Hz, 1H), 7.84 (d,  $J = 7.6$  Hz, 1H), 7.73 (d,  $J = 7.6$  Hz, 1H), 7.66-7.60 (m, 2H), 7.49 (t,  $J = 7.2$  Hz, 1H), 7.38 (m, 2H).  $^{13}\text{C}\{^1\text{H}\}$  NMR (100 MHz,  $\text{DMSO}-d_6$ )  $\delta$  158.7, 143.4, 133.7, 130.0, 128.8, 126.1, 124.4, 123.7, 123.6, 123.1, 122.7, 120.7, 120.4, 118.8, 117.9, 116.6, 112.6, 108.0. HRMS (ESI-TOF)  $m/z$ :  $[\text{M}+\text{H}]^+$  calcd for  $\text{C}_{18}\text{H}_{12}\text{NO}$  258.0913; found 258.0914.

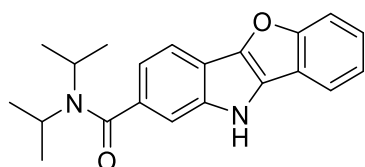

**N,N-diisopropyl-10H-benzofuro[3,2-b]indole-2-carboxamide**

**(4r)**

This compound was prepared according to the general procedure 1, white solid, 115.2 mg, 69%.  $^1\text{H}$  NMR (400 MHz,  $\text{CDCl}_3$ )  $\delta$  10.18 (s, 1H), 7.66 (d,  $J = 8.0$  Hz, 1H), 7.53-7.48 (m, 2H), 7.23-7.14



(m, 3H), 7.03 (d,  $J = 8.0$  Hz, 1H), 1.51 (s, 12H).  $^{13}\text{C}\{^1\text{H}\}$  NMR (100 MHz,  $\text{CDCl}_3$ )  $\delta$  172.5, 159.5, 143.0, 139.5, 132.5, 127.3, 124.0, 122.6, 118.9, 118.5, 117.2, 116.6, 114.2, 112.6, 111.1, 20.9. HRMS (ESI-TOF)  $m/z$ :  $[\text{M}+\text{Na}]^+$  calcd for  $\text{C}_{21}\text{H}_{22}\text{N}_2\text{O}_2\text{Na}$  357.1573; found 357.1561.

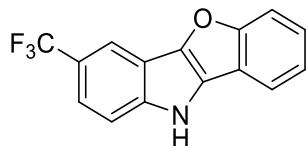

**3-(trifluoromethyl)-10H-benzofuro[3,2-b]indole (4s)**

This compound was prepared according to the general procedure 1, white solid, 78.1 mg, 56%.  $^1\text{H}$  NMR (400 MHz,  $\text{DMSO}-d_6$ )  $\delta$  12.07 (s, 1H), 8.16 (t,  $J = 0.8$  Hz, 1H), 7.87-7.85 (m, 1H), 7.77-7.74 (m, 2H), 7.52 (dd,  $J = 8.8, 2.0$  Hz, 1H), 7.44-7.37 (m, 2H).  $^{13}\text{C}\{^1\text{H}\}$  NMR (100 MHz,  $\text{DMSO}-d_6$ )  $\delta$  158.9, 141.7, 140.4, 129.4, 127.4, 126.7 (d,  $J = 269.8$  Hz), 124.9, 123.2, 120.8 (q,  $J = 31.2$  Hz), 118.8, 118.5 (d,  $J = 3.5$  Hz), 118.1, 114.1 (d,  $J = 4.2$  Hz), 113.8, 112.8, 111.9. HRMS (ESI-TOF)  $m/z$ :  $[\text{M}+\text{H}]^+$  calcd for  $\text{C}_{15}\text{H}_9\text{NOF}_3$  276.0631; found 276.0626.

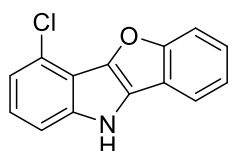

**4-chloro-10H-benzofuro[3,2-b]indole (4t)**

This compound was prepared according to the general procedure 1, white solid, 118.5 mg, 98%.  $^1\text{H}$  NMR (400 MHz,  $\text{CDCl}_3$ )  $\delta$  8.17 (s, 1H), 7.69-7.64 (m, 2H), 7.85-7.83 (m, 1H), 7.38-7.29 (m, 3H), 7.22-7.14 (m, 2H).  $^{13}\text{C}\{^1\text{H}\}$  NMR (100 MHz,  $\text{CDCl}_3$ )  $\delta$  159.6, 142.3, 140.2, 126.0, 124.6, 123.7, 123.4, 123.0, 120.5, 118.2, 118.1, 113.7, 113.2, 111.0. HRMS (ESI-TOF)  $m/z$ :  $[\text{M}+\text{H}]^+$  calcd for  $\text{C}_{14}\text{H}_9\text{NOCl}$  242.0367; found 242.0365.

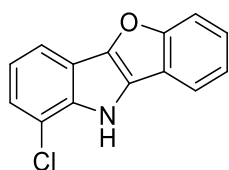

**1-chloro-10H-benzofuro[3,2-b]indole (4u)**

This compound was prepared according to the general procedure 1, white solid, 93.9 mg, 78%.  $^1\text{H}$  NMR (400 MHz,  $\text{CDCl}_3$ )  $\delta$  8.36 (s, 1H), 7.76-7.73 (m, 2H), 7.65-7.62 (m, 1H), 7.39-7.32 (m, 2H), 7.29 (dd,  $J = 7.6, 0.8$  Hz, 1H), 7.17 (t,  $J = 8.0$  Hz, 1H).  $^{13}\text{C}\{^1\text{H}\}$  NMR (100 MHz,  $\text{CDCl}_3$ )  $\delta$  159.3, 143.5, 136.2, 125.7, 124.4, 122.9, 122.2, 120.9, 118.4, 118.1, 117.6, 115.8, 115.6, 112.8. HRMS (ESI-TOF)  $m/z$ :  $[\text{M}+\text{H}]^+$  calcd for  $\text{C}_{14}\text{H}_9\text{NOCl}$  242.0367; found 242.0361.

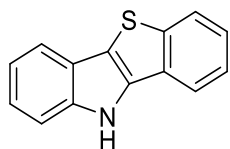

**10H-benzo[4,5]thieno[3,2-b]indole (6a)**

This compound was prepared according to the general procedure 1, white solid, 109.4 mg, 98%. The general procedure 2, 100.5 mg, 90%.  $^1\text{H}$  NMR (400 MHz,  $\text{DMSO-}d_6$ )  $\delta$  12.12 (s, 1H), 8.07 (d,  $J = 7.6$  Hz, 1H), 8.02 (d,  $J = 8.0$  Hz, 1H), 7.77 (d,  $J = 8.0$  Hz, 1H), 7.59 (d,  $J = 8.4$  Hz, 1H), 7.49 (t,  $J = 7.2$  Hz, 1H), 7.39 (t,  $J = 7.2$  Hz, 1H), 7.29 (td,  $J = 7.2, 1.2$  Hz, 1H), 7.15 (t,  $J = 7.2$  Hz, 1H).  $^{13}\text{C}\{^1\text{H}\}$  NMR (100 MHz,  $\text{DMSO-}d_6$ )  $\delta$  142.0, 140.6, 137.5, 126.7, 124.5, 124.4, 124.3, 122.8, 121.5, 120.2, 119.4, 118.8, 113.8, 112.6. HRMS (ESI-TOF)  $m/z$ :  $[\text{M}+\text{H}]^+$  calcd for  $\text{C}_{14}\text{H}_{10}\text{NS}$  224.0528; found 224.0527.

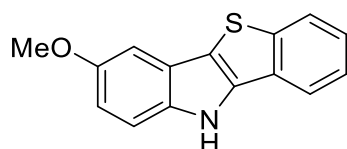

**3-methoxy-10H-benzo[4,5]thieno[3,2-b]indole (6b)**

This compound was prepared according to the general procedure 1, white solid, 114.1 mg, 90%. The general procedure 2, 101.1 mg, 80%.  $^1\text{H}$  NMR (400 MHz,  $\text{DMSO-}d_6$ )  $\delta$  11.93 (s, 1H), 8.04-7.99 (m, 2H), 7.49-7.45 (m, 2H), 7.36 (td,  $J = 8.0, 1.2$  Hz, 1H), 7.30 (d,  $J = 2.4$  Hz, 1H), 6.91 (dd,  $J = 8.8, 2.4$  Hz, 1H), 3.82 (s, 3H).  $^{13}\text{C}\{^1\text{H}\}$  NMR (100 MHz,  $\text{DMSO-}d_6$ )  $\delta$  153.5, 141.9, 138.1, 135.5, 126.8, 124.5, 124.4, 124.2, 121.8, 120.1, 113.5, 113.3, 113.0, 100.7, 55.5. HRMS (ESI-TOF)  $m/z$ :  $[\text{M}+\text{H}]^+$  calcd for  $\text{C}_{15}\text{H}_{12}\text{NOS}$  254.0634; found 254.0623.

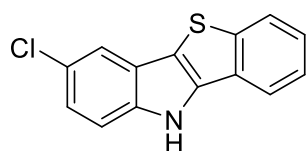

**3-chloro-10H-benzo[4,5]thieno[3,2-b]indole (6c)**

This compound was prepared according to the general procedure 1, yellow solid, 126.2 mg, 98%. The general procedure 2, 117.1 mg, 91%.  $^1\text{H}$  NMR (400 MHz,  $\text{DMSO-}d_6$ )  $\delta$  12.34 (s, 1H), 8.07 (d,  $J = 8.0$  Hz, 1H), 8.03 (d,  $J = 8.0$  Hz, 1H), 7.91 (d,  $J = 1.6$  Hz, 1H), 7.60 (d,  $J = 8.8$  Hz, 1H), 7.50 (t,  $J = 7.2$  Hz, 1H), 7.41 (t,  $J = 7.2$  Hz, 1H), 7.27 (dd,  $J = 8.4, 1.6$  Hz, 1H).  $^{13}\text{C}\{^1\text{H}\}$  NMR (100 MHz,  $\text{DMSO-}d_6$ )  $\delta$  142.4, 139.0, 138.9, 126.3, 124.9, 124.7, 124.5, 123.8, 122.7, 122.5, 120.5, 118.3, 114.1, 113.3.<sup>6</sup>

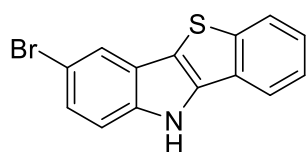

**3-bromo-10H-benzo[4,5]thieno[3,2-b]indole (6d)**

This compound was prepared according to the general procedure 1, yellow solid, 148.6 mg, 98%. The general procedure 2, 132.6 mg, 88%.  $^1\text{H}$  NMR (400 MHz,  $\text{DMSO}-d_6$ )  $\delta$  12.36 (s, 1H), 8.09 (s, 1H), 8.05-8.02 (m, 2H), 7.57 (d,  $J = 8.4$  Hz, 1H), 7.50 (t,  $J = 7.6$  Hz, 1H), 7.42-7.37 (m, 2H).  $^{13}\text{C}\{^1\text{H}\}$  NMR (100 MHz,  $\text{DMSO}-d_6$ )  $\delta$  142.4, 139.3, 138.7, 126.3, 125.2, 124.8, 124.6, 124.5, 123.2, 121.2, 120.5, 114.5, 113.2, 111.7. HRMS (ESI-TOF)  $m/z$ :  $[\text{M}+\text{H}]^+$  calcd for  $\text{C}_{14}\text{H}_9\text{NSBr}$  301.9634; found 301.9628.

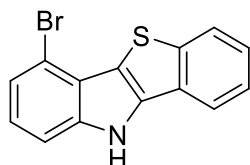

**4-bromo-10H-benzo[4,5]thieno[3,2-b]indole (6e)**

This compound was prepared according to the general procedure 1, yellow solid, 142.7 mg, 94%.  $^1\text{H}$  NMR (400 MHz,  $\text{CDCl}_3$ )  $\delta$  8.67 (s, 1H), 7.94-7.91 (m, 1H), 7.85-7.83 (m, 1H), 7.46-7.36 (m, 4H), 7.15 (t,  $J = 8.0$  Hz, 1H).  $^{13}\text{C}\{^1\text{H}\}$  NMR (100 MHz,  $\text{CDCl}_3$ )  $\delta$  143.6, 140.7, 137.2, 126.2, 124.6, 124.5, 124.4, 124.3, 124.0, 123.0, 119.6, 117.0, 113.8, 111.2. HRMS (ESI-TOF)  $m/z$ :  $[\text{M}+\text{Na}]^+$  calcd for  $\text{C}_{14}\text{H}_8\text{BrNSNa}$  323.9453; found 323.9459.

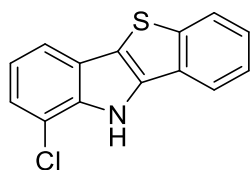

**1-chloro-10H-benzo[4,5]thieno[3,2-b]indole (6f)**

This compound was prepared according to the general procedure 1, white solid, 98.9 mg, 77%.  $^1\text{H}$  NMR (400 MHz,  $\text{DMSO}-d_6$ )  $\delta$  12.4 (s, 1H), 8.28 (d,  $J = 8.0$  Hz, 1H), 8.04 (d,  $J = 8.0$  Hz, 1H), 7.79 (d,  $J = 8.0$  Hz, 1H), 7.51 (t,  $J = 8.0$  Hz, 1H), 7.44-7.40 (m, 1H), 7.36 (dd,  $J = 8.0, 1.2$  Hz, 1H), 7.16 (t,  $J = 7.6$  Hz, 1H).  $^{13}\text{C}\{^1\text{H}\}$  NMR (100 MHz,  $\text{DMSO}-d_6$ )  $\delta$  142.3, 138.3, 137.2, 126.5, 124.9, 124.7, 124.4, 123.3, 122.2, 121.0, 120.4, 117.9, 116.5, 114.7. HRMS (ESI-TOF)  $m/z$ :  $[\text{M}+\text{Na}]^+$  calcd for  $\text{C}_{14}\text{H}_8\text{ClNSNa}$  279.9958; found 279.9962.

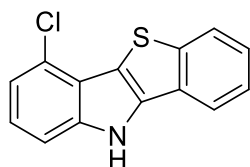

**4-chloro-10H-benzo[4,5]thieno[3,2-b]indole (6g)**

This compound was prepared according to the general procedure 1, white solid, 118.1 mg, 92%.  $^1\text{H}$  NMR (400 MHz,  $\text{DMSO}-d_6$ )  $\delta$  12.5 (s, 1H), 8.12 (d,  $J = 8.0$  Hz, 1H), 8.06 (d,  $J = 8.0$  Hz, 1H), 7.59 (d,  $J = 8.0$  Hz, 1H), 7.53 (t,  $J = 7.6$  Hz, 1H), 7.43 (t,  $J = 7.2$  Hz, 1H), 7.29-7.22 (m, 2H).  $^{13}\text{C}\{^1\text{H}\}$

NMR (100 MHz, DMSO-*d*<sub>6</sub>) δ 142.6, 141.2, 138.0, 126.1, 124.8, 124.7, 124.5, 123.8, 123.4, 120.5, 120.4, 118.8, 112.5, 111.6. HRMS (ESI-TOF) *m/z*: [M+Na]<sup>+</sup> calcd for C<sub>14</sub>H<sub>8</sub>CINSNa 279.9958; found 279.9976.

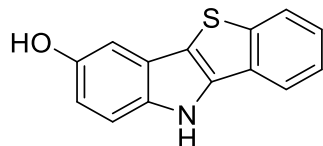

**10*H*-benzo[4,5]thieno[3,2-*b*]indol-3-ol (6h)**

This compound was prepared according to the general procedure 1, white solid, 100.0 mg, 84%. <sup>1</sup>H NMR (400 MHz, DMSO-*d*<sub>6</sub>) δ 11.77 (s, 1H), 8.98 (s, 1H), 8.01-7.97 (m, 2H), 7.46 (td, *J* = 7.2, 1.2 Hz, 1H), 7.39-7.33 (m, 2H), 7.02 (d, *J* = 2.4 Hz, 1H), 6.79 (dd, *J* = 8.8, 2.4 Hz, 1H). <sup>13</sup>C{<sup>1</sup>H} NMR (100 MHz, DMSO-*d*<sub>6</sub>) δ 151.0, 141.8, 138.0, 135.0, 126.8, 124.5, 124.4, 124.1, 122.1, 120.0, 113.1, 113.0, 112.9, 102.8. HRMS (ESI-TOF) *m/z*: [M+H]<sup>+</sup> calcd for C<sub>14</sub>H<sub>10</sub>NOS 240.0478; found 240.0472.

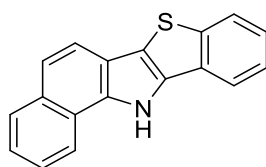

**12*H*-benzo[*g*]benzo[4,5]thieno[3,2-*b*]indole (6i)**

This compound was prepared according to the general procedure 1, white solid, 92.9 mg, 68%. <sup>1</sup>H NMR (400 MHz, DMSO-*d*<sub>6</sub>) δ 12.94 (s, 1H), 8.49 (d, *J* = 8.4 Hz, 1H), 8.16 (d, *J* = 8.0 Hz, 1H), 8.05-8.00 (m, 2H), 7.90 (d, *J* = 8.8 Hz, 1H), 7.66 (t, *J* = 8.0 Hz, 1H), 7.61 (d, *J* = 8.8 Hz, 1H), 7.55-7.49 (m, 2H), 7.39 (t, *J* = 8.0 Hz, 1H). <sup>13</sup>C{<sup>1</sup>H} NMR (100 MHz, DMSO-*d*<sub>6</sub>) δ 141.6, 136.0, 135.3, 130.3, 128.7, 126.9, 125.8, 124.7, 124.5, 124.0, 122.5, 120.8, 120.2, 119.8, 118.9, 117.1, 115.7. HRMS (ESI-TOF) *m/z*: [M+H]<sup>+</sup> calcd for C<sub>18</sub>H<sub>12</sub>NS 274.0685; found 274.0685.

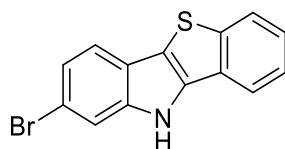

**2-bromo-10*H*-benzo[4,5]thieno[3,2-*b*]indole (6j)**

This compound was prepared according to the general procedure 2, yellow solid, 113.1 mg, 75%. <sup>1</sup>H NMR (400 MHz, DMSO-*d*<sub>6</sub>) δ 12.33 (s, 1H), 8.10 (d, *J* = 7.6 Hz, 1H), 8.04 (d, *J* = 8.0 Hz, 1H), 7.80 (s, 1H), 7.78 (d, *J* = 7.6 Hz, 1H), 7.51 (t, *J* = 7.2 Hz, 1H), 7.42 (t, *J* = 7.2 Hz, 1H), 7.29 (d, *J* = 8.4 Hz, 1H). <sup>13</sup>C{<sup>1</sup>H} NMR (100 MHz, DMSO-*d*<sub>6</sub>) δ 142.2, 141.3, 138.2, 126.4, 124.7, 124.5, 122.2, 120.6, 120.4, 115.4, 115.1, 113.9. HRMS (ESI-TOF) *m/z*: [M+Na]<sup>+</sup> calcd for C<sub>14</sub>H<sub>8</sub>NNaS 323.9453; found 323.9441.

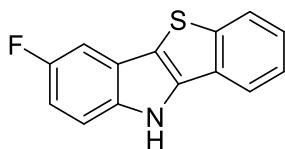

**3-fluoro-10H-benzo[4,5]thieno[3,2-b]indole (6k)**

This compound was prepared according to the general procedure 2, yellow solid, 102.4 mg, 85%.  $^1\text{H}$  NMR (400 MHz,  $\text{DMSO}-d_6$ )  $\delta$  12.23 (s, 1H), 8.09 (d,  $J = 8.0$  Hz, 1H), 8.04 (d,  $J = 8.0$  Hz, 1H), 7.65 (dd,  $J = 9.6, 2.0$  Hz, 1H), 7.61 (dd,  $J = 9.2, 4.8$  Hz, 1H), 7.51 (t,  $J = 7.6$  Hz, 1H), 7.42 (t,  $J = 7.6$  Hz, 1H), 7.14 (td,  $J = 9.2, 2.4$  Hz, 1H).  $^{13}\text{C}\{^1\text{H}\}$  NMR (100 MHz,  $\text{DMSO}-d_6$ )  $\delta$  156.8 (d,  $J = 231.3$  Hz), 142.3, 139.2, 137.2, 126.5, 124.7, 124.6, 124.5, 121.6 (d,  $J = 11.0$  Hz), 126.4, 113.7 (d,  $J = 4.4$  Hz), 113.5 (d,  $J = 9.8$  Hz), 110.8 (d,  $J = 25.7$  Hz), 104.0 (d,  $J = 24.5$  Hz). HRMS (ESI-TOF)  $m/z$ :  $[\text{M}+\text{H}]^+$  calcd for  $\text{C}_{14}\text{H}_9\text{FN}$  242.0434; found 242.0424.

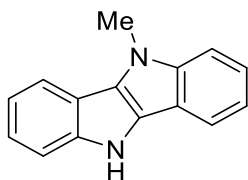

**5-methyl-5,10-dihydroindolo[3,2-b]indole (8a)**

This compound was prepared according to the general procedure 1, white solid, 107.9 mg, 98%. The general procedure 3, 94.3 mg, 86%.  $^1\text{H}$  NMR (400 MHz,  $\text{DMSO}-d_6$ )  $\delta$  11.20 (s, 1H), 7.96 (d,  $J = 7.6$  Hz, 1H), 7.76 (d,  $J = 7.6$  Hz, 1H), 7.55 (d,  $J = 8.4$  Hz, 1H), 7.50 (d,  $J = 8.4$  Hz, 1H), 7.26-7.18 (m, 2H), 7.13-7.07 (m, 2H), 4.10 (s, 3H).  $^{13}\text{C}\{^1\text{H}\}$  NMR (100 MHz,  $\text{DMSO}-d_6$ )  $\delta$  140.8, 140.3, 126.8, 124.1, 121.6, 121.4, 118.0, 117.9, 117.7, 117.3, 114.5, 114.3, 112.2, 109.9, 31.4. HRMS (ESI-TOF)  $m/z$ :  $[\text{M}+\text{H}]^+$  calcd for  $\text{C}_{15}\text{H}_{13}\text{N}_2$  221.1073; found 221.1067.

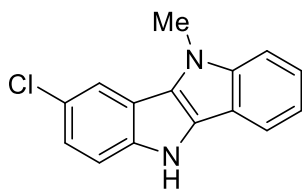

**3-chloro-5-methyl-5,10-dihydroindolo[3,2-b]indole (8b)**

This compound was prepared according to the general procedure 1, yellow solid, 125.7 mg, 99%. The general procedure 3, 108.1 mg, 85%.  $^1\text{H}$  NMR (400 MHz,  $\text{DMSO}-d_6$ )  $\delta$  11.43 (s, 1H), 8.03 (d,  $J = 2.4$  Hz, 1H), 7.79-7.76 (m, 1H), 7.56 (d,  $J = 8.4$  Hz, 1H), 7.52 (dd,  $J = 8.8, 0.4$  Hz, 1H), 7.29-7.25 (m, 1H), 7.18 (dd,  $J = 8.8, 2.0$  Hz, 1H), 7.14-7.10 (m, 1H), 4.09 (s, 3H).  $^{13}\text{C}\{^1\text{H}\}$  NMR (100 MHz,  $\text{DMSO}-d_6$ )  $\delta$  141.2, 138.5, 126.0, 125.6, 122.4, 122.2, 121.2, 118.1, 118.0, 116.6, 115.1, 113.9, 113.5, 110.1, 31.4. HRMS (ESI-TOF)  $m/z$ :  $[\text{M}+\text{H}]^+$  calcd for  $\text{C}_{15}\text{H}_{12}\text{ClN}_2$  255.0684; found 255.0689.

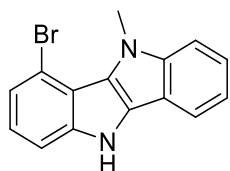

**4-bromo-5-methyl-5,10-dihydroindolo[3,2-b]indole (8c)**

This compound was prepared according to the general procedure 1, yellow solid, 119.4 mg, 80%.  $^1\text{H}$  NMR (400 MHz,  $\text{DMSO}-d_6$ )  $\delta$  11.80 (s, 1H), 7.81 (d,  $J = 7.6$  Hz, 1H), 7.62 (d,  $J = 8.4$  Hz, 1H), 7.57 (dd,  $J = 8.4, 0.8$  Hz, 1H), 7.35-7.30 (m, 2H), 7.17-7.09 (m, 2H), 4.31 (s, 3H).  $^{13}\text{C}\{^1\text{H}\}$  NMR (100 MHz,  $\text{DMSO}-d_6$ )  $\delta$  142.0, 141.2, 126.5, 124.9, 122.8, 122.3, 122.2, 118.3, 117.9, 115.5, 113.3, 111.6, 110.5, 109.8, 34.6. HRMS (ESI-TOF)  $m/z$ :  $[\text{M}+\text{H}]^+$  calcd for  $\text{C}_{15}\text{H}_{12}\text{BrN}_2$  299.0178; found 299.0184.

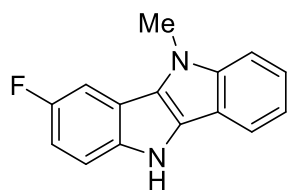

**3-fluoro-5-methyl-5,10-dihydroindolo[3,2-b]indole (8d)**

This compound was prepared according to the general procedure 1, yellow solid, 119.4 mg, 99%.  $^1\text{H}$  NMR (400 MHz,  $\text{DMSO}-d_6$ )  $\delta$  11.32 (s, 1H), 7.81 (d,  $J = 8.0$  Hz, 2H), 7.56-7.50 (m, 2H), 7.27 (t,  $J = 7.2$  Hz, 1H), 7.14 (t,  $J = 7.6$  Hz, 1H), 7.06 (td,  $J = 9.2, 2.8$  Hz, 1H), 4.08 (s, 3H).  $^{13}\text{C}\{^1\text{H}\}$  NMR (100 MHz,  $\text{DMSO}-d_6$ )  $\delta$  156.3 (d,  $J = 229.4$  Hz), 141.3, 137.0, 126.8 (d,  $J = 4.0$  Hz), 126.2, 122.2, 118.1, 114.2, 114.0 (d,  $J = 10.5$  Hz), 113.0 (d,  $J = 9.8$  Hz), 110.7, 109.3 (d,  $J = 25.6$  Hz), 102.5 (d,  $J = 24.5$  Hz), 31.3. HRMS (ESI-TOF)  $m/z$ :  $[\text{M}+\text{H}]^+$  calcd for  $\text{C}_{15}\text{H}_{12}\text{FN}_2$  239.0979; found 239.0985.

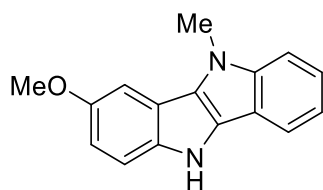

**3-methoxy-5-methyl-5,10-dihydroindolo[3,2-b]indole (8e)**

This compound was prepared according to the general procedure 1, white solid, 103.7 mg, 83%. The general procedure 3, 88.6 mg, 71%.  $^1\text{H}$  NMR (400 MHz,  $\text{DMSO}-d_6$ )  $\delta$  10.96 (s, 1H), 7.73 (d,  $J = 7.6$  Hz, 1H), 7.53 (d,  $J = 8.4$  Hz, 1H), 7.47 (d,  $J = 2.4$  Hz, 1H), 7.39 (d,  $J = 7.2$  Hz, 1H), 7.25-7.21 (m, 1H), 7.09 (t,  $J = 7.2$  Hz, 1H), 6.85 (dd,  $J = 8.8, 2.4$  Hz, 1H), 4.09 (s, 3H), 3.85 (s, 3H).  $^{13}\text{C}\{^1\text{H}\}$  NMR (100 MHz,  $\text{DMSO}-d_6$ )  $\delta$  152.7, 141.0, 135.6, 126.9, 125.2, 121.5, 117.8, 117.7, 114.4 (two peaks), 112.8, 111.2, 109.9, 100.0, 55.7, 31.4. HRMS (ESI-TOF)  $m/z$ :  $[\text{M}+\text{H}]^+$  calcd for  $\text{C}_{16}\text{H}_{15}\text{N}_2\text{O}$  251.1179; found 251.1184.

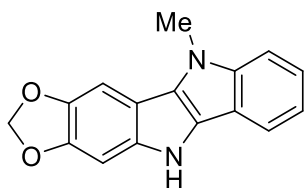

**5-methyl-5,10-dihydro-[1,3]dioxolo[4,5-f]indolo[3,2-b]indole (8f)**

This compound was prepared according to the general procedure 1, white solid, 106.7 mg, 81%.  $^1\text{H}$  NMR (400 MHz,  $\text{DMSO}-d_6$ )  $\delta$  11.00 (s, 1H), 7.67 (m, 1H), 7.50-7.47 (m, 2H), 7.17 (t,  $J = 7.6$  Hz, 1H), 7.06-7.04 (m, 2H), 6.00 (s, 2H), 4.03 (s, 3H).  $^{13}\text{C}\{^1\text{H}\}$  NMR (100 MHz,  $\text{DMSO}-d_6$ )  $\delta$  144.0, 141.2, 140.4, 135.6, 127.4, 123.4, 120.7, 117.8, 117.0, 114.7, 109.7, 107.7, 100.3, 96.6, 93.4, 31.2. HRMS (ESI-TOF)  $m/z$ :  $[\text{M}+\text{H}]^+$  calcd for  $\text{C}_{16}\text{H}_{13}\text{N}_2\text{O}_2$  265.0972; found 265.0977.

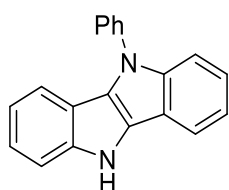

**5-phenyl-5,10-dihydroindolo[3,2-b]indole (8g)**

This compound was prepared according to the general procedure 1, yellow solid, 134.1 mg, 95%. The general procedure 3, 105.9 mg, 75%.  $^1\text{H}$  NMR (400 MHz,  $\text{DMSO}-d_6$ )  $\delta$  11.51 (s, 1H), 7.90-7.87 (m, 1H), 7.76 (d,  $J = 7.6$  Hz, 1H), 7.70 (d,  $J = 8.0$  Hz, 2H), 7.62 (d,  $J = 7.6$  Hz, 1H), 7.58 (d,  $J = 8.0$  Hz, 1H), 7.50-7.43 (m, 2H), 7.29-7.20 (m, 3H), 7.04 (t,  $J = 7.6$  Hz, 1H).  $^{13}\text{C}\{^1\text{H}\}$  NMR (100 MHz,  $\text{DMSO}-d_6$ )  $\delta$  140.4, 139.9, 138.5, 129.9, 126.4, 126.0, 125.1, 124.8, 122.7, 121.8, 119.7, 118.3, 118.2, 117.5, 115.7, 114.1, 112.5, 110.6. HRMS (ESI-TOF)  $m/z$ :  $[\text{M}+\text{H}]^+$  calcd for  $\text{C}_{20}\text{H}_{15}\text{N}_2$  283.1230; found 283.1235.

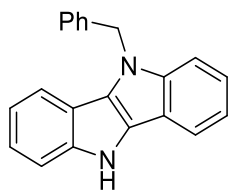

**5-benzyl-5,10-dihydroindolo[3,2-b]indole (8h)**

This compound was prepared according to the general procedure 1, white solid, 109.4 mg, 74%.  $^1\text{H}$  NMR (400 MHz,  $\text{DMSO}-d_6$ )  $\delta$  11.27 (s, 1H), 7.79 (d,  $J = 7.6$  Hz, 1H), 7.75 (d,  $J = 8.0$  Hz, 1H), 7.66 (d,  $J = 8.4$  Hz, 1H), 7.50 (d,  $J = 8.4$  Hz, 1H), 7.26-7.10 (m, 8H), 7.04-7.00 (m, 1H), 5.78 (s, 2H).  $^{13}\text{C}\{^1\text{H}\}$  NMR (100 MHz,  $\text{DMSO}-d_6$ )  $\delta$  140.6, 140.3, 138.7, 128.5, 127.2, 126.7, 126.1, 127.7, 121.7, 121.6, 118.3, 118.1, 117.8, 117.4, 114.6, 114.4, 112.2, 110.4, 47.8. HRMS (ESI-TOF)  $m/z$ :  $[\text{M}+\text{H}]^+$  calcd for  $\text{C}_{21}\text{H}_{17}\text{N}_2$  297.1386; found 297.1392.

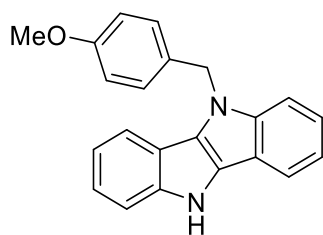

**5-(4-methoxybenzyl)-5,10-dihydroindolo[3,2-b]indole (8i)**

This compound was prepared according to the general procedure 1, white solid, 141.1 mg, 86%.  $^1\text{H}$  NMR (400 MHz,  $\text{DMSO}-d_6$ )  $\delta$  11.25 (s, 1H), 7.79 (d,  $J = 7.6$  Hz, 1H), 7.75 (d,  $J = 8.0$  Hz, 1H), 7.67 (d,  $J = 8.4$  Hz, 1H), 7.49 (d,  $J = 8.0$  Hz, 1H), 7.23-7.19 (m, 1H), 7.18-7.15 (m, 3H), 7.12-7.09 (m, 1H), 7.05-7.01 (m, 1H), 6.81-6.78 (m, 2H), 5.70 (s, 2H), 3.64 (s, 3H).  $^{13}\text{C}\{^1\text{H}\}$  NMR (100 MHz,  $\text{DMSO}-d_6$ )  $\delta$  158.4, 140.5, 140.3, 130.6, 128.0, 126.1, 124.7, 121.6, 121.5, 118.2, 118.1, 117.8, 117.5, 114.6, 114.4, 113.9, 112.2, 110.4, 55.0, 47.3. HRMS (ESI-TOF)  $m/z$ :  $[\text{M}+\text{Na}]^+$  calcd for  $\text{C}_{22}\text{H}_{18}\text{N}_2\text{ONa}$  349.1311; found 349.1320.

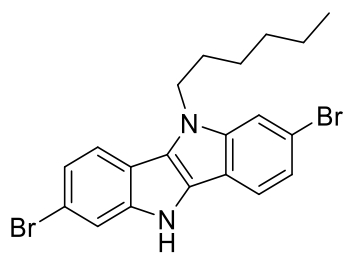

**2,7-dibromo-5-hexyl-5,10-dihydroindolo[3,2-b]indole (8j)**

This compound was prepared according to the general procedure 1, white solid, 174.5 mg, 78%.  $^1\text{H}$  NMR (400 MHz,  $\text{CDCl}_3$ )  $\delta$  7.97 (s, 1H), 7.62 (d,  $J = 8.4$  Hz, 1H), 7.57 (dd,  $J = 5.6, 1.6$  Hz, 2H), 7.54 (d,  $J = 8.4$  Hz, 1H), 7.31 (dd,  $J = 8.4, 1.6$  Hz, 1H), 7.26-7.24 (m, 1H), 4.35 (t,  $J = 7.2$  Hz, 2H), 1.92-1.86 (m, 2H), 1.39-1.24 (m, 6H), 0.85 (t,  $J = 7.2$  Hz, 3H).  $^{13}\text{C}\{^1\text{H}\}$  NMR (100 MHz,  $\text{CDCl}_3$ )  $\delta$  141.4, 142.2, 127.3, 124.2, 122.8, 121.7, 119.0, 118.6, 115.9, 115.7, 115.3, 114.3, 113.2, 113.0, 45.6, 31.6, 30.3, 26.8, 22.6, 14.1. HRMS (ESI-TOF)  $m/z$ :  $[\text{M}+\text{H}]^+$  calcd for  $\text{C}_{20}\text{H}_{21}\text{N}_2\text{Br}_2$  447.0066; found 447.0051.

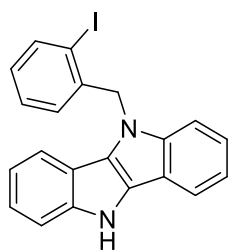

**5-(2-iodobenzyl)-5,10-dihydroindolo[3,2-b]indole (8k)**

This compound was prepared according to the general procedure 1, yellow solid, 137.1 mg, 65%.  $^1\text{H}$  NMR (400 MHz,  $\text{DMSO}-d_6$ )  $\delta$  11.36 (s, 1H), 7.96 (d,  $J = 8.0$  Hz, 1H), 7.83 (d,  $J = 7.6$  Hz, 1H), 7.55-7.50 (m, 2H), 7.45 (d,  $J = 7.6$  Hz, 1H), 7.24-7.21 (m, 1H), 7.18-7.13 (m, 2H), 7.09 (t,  $J = 7.6$



Hz, 1H), 7.00-6.95 (m, 2H), 6.28 (d,  $J = 7.6$  Hz, 1H), 5.73 (s, 2H).  $^{13}\text{C}\{^1\text{H}\}$  NMR (100 MHz, DMSO- $d_6$ )  $\delta$  140.6, 140.3, 139.9, 139.3, 129.4, 128.4, 126.6, 125.9, 124.8, 122.0, 121.7, 118.6, 118.3, 118.0, 116.9, 114.6, 114.2, 112.4, 110.2, 97.4, 53.2. HRMS (ESI-TOF)  $m/z$ :  $[\text{M}+\text{H}]^+$  calcd for  $\text{C}_{21}\text{H}_{16}\text{N}_2$  423.0353; found 423.0343.

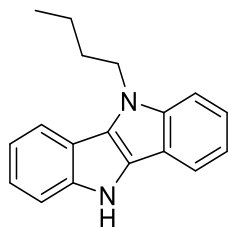

### 5-butyl-5,10-dihydroindolo[3,2-b]indole (8l)

This compound was prepared according to the general procedure 1, yellow solid, 114.5 mg, 85%. The general procedure 3, 104.8 mg, 80%.  $^1\text{H}$  NMR (400 MHz, DMSO- $d_6$ )  $\delta$  11.21 (s, 1H), 7.86 (d,  $J = 8.0$  Hz, 1H), 7.76 (d,  $J = 7.6$  Hz, 1H), 7.57 (d,  $J = 8.0$  Hz, 1H), 7.51 (d,  $J = 8.0$  Hz, 1H), 7.24-7.18 (m, 2H), 7.12-7.07 (m, 2H), 4.52 (t,  $J = 7.2$  Hz, 2H), 1.86-1.79 (m, 2H), 1.32-1.24 (m, 2H), 0.85 (t,  $J = 7.6$  Hz, 3H).  $^{13}\text{C}\{^1\text{H}\}$  NMR (100 MHz, DMSO- $d_6$ )  $\delta$  140.3, 140.2, 126.1, 124.3, 121.5, 121.4, 118.1, 117.7, 114.4, 114.2, 112.2, 110.0, 44.2, 32.2, 19.6, 13.8. HRMS (ESI-TOF)  $m/z$ :  $[\text{M}+\text{H}]^+$  calcd for  $\text{C}_{18}\text{H}_{19}\text{N}_2$  263.1543; found 263.1541.

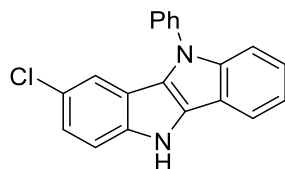

### 3-chloro-5-phenyl-5,10-dihydroindolo[3,2-b]indole (8m)

This compound was prepared according to the general procedure 3, yellow solid, 105.9 mg, 67%.  $^1\text{H}$  NMR (400 MHz, DMSO- $d_6$ )  $\delta$  11.74 (s, 1H), 7.90-7.88 (m, 1H), 7.78-7.70 (m, 4H), 7.62-7.58 (m, 2H), 7.53-7.48 (m, 1H), 7.33-7.23 (m, 3H), 7.21 (dd,  $J = 8.8, 2.4$  Hz, 1H).  $^{13}\text{C}\{^1\text{H}\}$  NMR (100 MHz, DMSO- $d_6$ )  $\delta$  140.3, 138.6, 138.2, 130.0, 127.5, 126.7, 124.8, 124.2, 123.4, 122.4, 121.5, 119.9, 118.5, 116.3, 115.3, 114.7, 114.0, 110.7. HRMS (ESI-TOF)  $m/z$ :  $[\text{M}+\text{H}]^+$  calcd for  $\text{C}_{20}\text{H}_{14}\text{ClN}_2$  317.0840; found 317.0827.

## Synthesis of 10

$t\text{BuOK}$  (99 mmol, 11.1 g), **7g** (45 mmol, 18.5 g) and  $\text{CuSO}_4$  (2.25 mmol, 359 mg) were weighed directly into a 2000 mL round bottom flask and dried under high vacuum for 15 min.  $\text{PhCl}$  (900 mL) was added under argon and stirred at  $90^\circ\text{C}$  until the disappearance of **7b**. The resulting mixture was cooled to RT, filtered through a silica gel pad and washed with EtOAc. The filtrate was concentrated and purified by chromatography on silica gel (PE/EA = 200/1 to PE/EA = 30/1) to

afford the corresponding product **8g** as a yellow solid (11.8 g, 93%). To **8g** (41.8 mmol, 11.8 g) in 350 mL DMF was added in an ice bath. Then NaH was added. After stirring for 30 min, **9** (54.3 mmol, 17.8 g) was added. The reaction mixture was stirred at 60 °C. The resulting reaction mixture was monitored by TLC. Upon completion of a starting materials, the reaction was cooled to RT. EtOAc (1 L) was added. Filtered get **10** as a yellow solid (20.7 g, 84%).

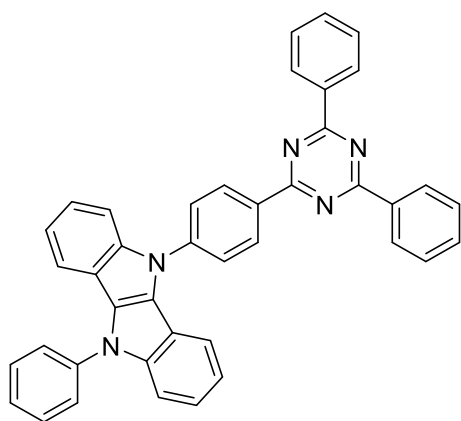

$^1\text{H}$  NMR (400 MHz,  $\text{CDCl}_3$ )  $\delta$  9.10-9.06 (m, 2H), 8.87-8.84 (m, 4H), 8.02-7.99 (m, 2H), 7.80-7.75 (m, 1H), 7.69-7.57 (m, 10H), 7.52-7.48 (m, 1H), 7.34-7.29 (m, 2H), 7.20-7.15 (m, 2H).  $^{13}\text{C}\{^1\text{H}\}$  NMR (100 MHz,  $\text{CDCl}_3$ )  $\delta$  172.0, 171.2, 142.8, 141.2, 140.8, 138.8, 136.4, 134.2, 132.8, 130.7, 129.9, 129.2, 128.9, 127.5, 127.1, 126.3, 126.1, 125.4, 123.3, 123.0, 120.3, 119.9, 118.9, 118.8, 116.4, 115.8, 111.2, 111.1. HRMS (ESI-TOF)  $m/z$ :  $[\text{M}+\text{H}]^+$  calcd for  $\text{C}_{41}\text{H}_{28}\text{N}_5$  590.2345; found 590.2336.

---

### 3. X-Ray Crystallographic Data

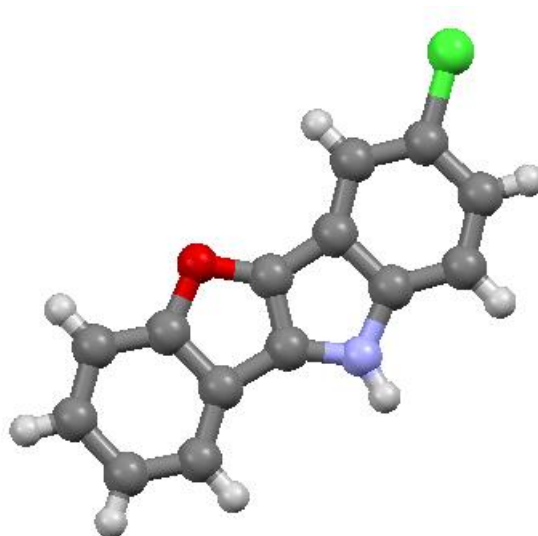

**Table S1 Crystal data and structure refinement for 3-chloro-10*H*-benzofuro[3,2-*b*]indole**

---

|                                        |                                     |
|----------------------------------------|-------------------------------------|
| Empirical formula                      | C <sub>14</sub> H <sub>8</sub> ClNO |
| Formula weight                         | 241.66                              |
| Temperature/K                          | 291(2)                              |
| Crystal system                         | orthorhombic                        |
| Space group                            | Pbca                                |
| <i>a</i> /Å                            | 14.7356(3)                          |
| <i>b</i> /Å                            | 5.75805(13)                         |
| <i>c</i> /Å                            | 24.9630(5)                          |
| $\alpha$ /°                            | 90                                  |
| $\beta$ /°                             | 90                                  |
| $\gamma$ /°                            | 90                                  |
| Volume/Å <sup>3</sup>                  | 2118.07(7)                          |
| <i>Z</i>                               | 8                                   |
| $\rho$ calcg/cm <sup>3</sup>           | 1.516                               |
| $\mu$ /mm <sup>-1</sup>                | 3.014                               |
| <i>F</i> (000)                         | 992.0                               |
| Crystal size/mm <sup>3</sup>           | 0.23 × 0.22 × 0.2                   |
| Radiation                              | CuK $\alpha$ ( $\lambda$ = 1.54184) |
| 2 $\theta$ range for data collection/° | 7.082 to 147.156                    |

---

|                                                |                                                               |
|------------------------------------------------|---------------------------------------------------------------|
| Index ranges                                   | $-11 \leq h \leq 17, -4 \leq k \leq 6, -30 \leq l \leq 30$    |
| Reflections collected                          | 4814                                                          |
| Independent reflections                        | 2073 [ $R_{\text{int}} = 0.0201, R_{\text{sigma}} = 0.0198$ ] |
| Data/restraints/parameters                     | 2073/0/155                                                    |
| Goodness-of-fit on $F^2$                       | 1.071                                                         |
| Final R indexes [ $I \geq 2\sigma(I)$ ]        | $R_1 = 0.0379, wR_2 = 0.0996$                                 |
| Final R indexes [all data]                     | $R_1 = 0.0398, wR_2 = 0.1019$                                 |
| Largest diff. peak/hole / $e \text{ \AA}^{-3}$ | 0.29/-0.27                                                    |

---

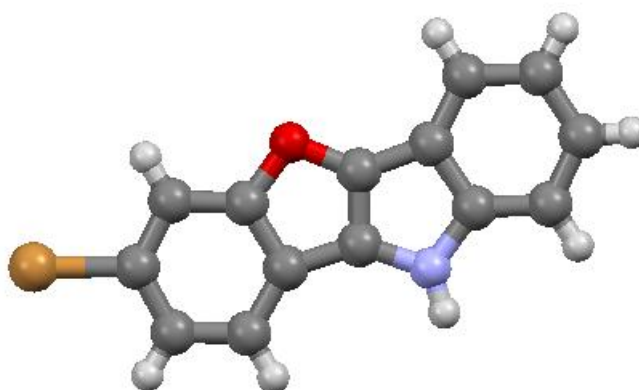

**Table S2 Crystal data and structure refinement for 7-bromo-10*H*-benzofuro[3,2-*b*]indole**

---

|                        |                 |
|------------------------|-----------------|
| Empirical formula      | $C_{14}H_8BrNO$ |
| Formula weight         | 286.12          |
| Temperature/K          | 291(2)          |
| Crystal system         | orthorhombic    |
| Space group            | $Pca2_1$        |
| $a/\text{\AA}$         | 8.28779(11)     |
| $b/\text{\AA}$         | 5.59996(10)     |
| $c/\text{\AA}$         | 24.2843(4)      |
| $\alpha/^\circ$        | 90              |
| $\beta/^\circ$         | 90              |
| $\gamma/^\circ$        | 90              |
| Volume/ $\text{\AA}^3$ | 1127.07(3)      |
| $Z$                    | 4               |

---

|                                                |                                                               |
|------------------------------------------------|---------------------------------------------------------------|
| $\rho_{\text{calc}}/\text{cm}^3$               | 1.686                                                         |
| $\mu/\text{mm}^{-1}$                           | 4.806                                                         |
| F(000)                                         | 568.0                                                         |
| Crystal size/ $\text{mm}^3$                    | $0.2 \times 0.2 \times 0.17$                                  |
| Radiation                                      | CuK $\alpha$ ( $\lambda = 1.54184$ )                          |
| 2 $\Theta$ range for data collection/ $^\circ$ | 7.28 to 147.562                                               |
| Index ranges                                   | $-10 \leq h \leq 10, -5 \leq k \leq 6, -29 \leq l \leq 29$    |
| Reflections collected                          | 9432                                                          |
| Independent reflections                        | 2233 [ $R_{\text{int}} = 0.0332, R_{\text{sigma}} = 0.0189$ ] |
| Data/restraints/parameters                     | 2233/1/155                                                    |
| Goodness-of-fit on $F^2$                       | 1.044                                                         |
| Final R indexes [ $I \geq 2\sigma(I)$ ]        | $R_1 = 0.0305, wR_2 = 0.0831$                                 |
| Final R indexes [all data]                     | $R_1 = 0.0307, wR_2 = 0.0833$                                 |
| Largest diff. peak/hole / $e \text{ \AA}^{-3}$ | 0.33/-0.30                                                    |
| Flack parameter                                | 0.00(2)                                                       |

---

#### 4. Reference

1. Sun, C.-L.; Gu, Y.-F.; Huang, W.-P.; Shi, Z.-J. *Chem. Commun.* **2011**, 47, 9813.
2. Chouhan, G.; Alper, H. *J. Org. Chem.* **2009**, 74, 6181.
3. Qureshi, Z.; Kim, J. Y.; Bruun, T.; Lam, H.; Lautens, M. *ACS Catal.* **2016**, 6, 4946.
4. Caruso, A., Jr.; Tovar, J. D. *J. Org. Chem.* **2011**, 76, 2227.
5. Chen, C.-Y.; He, F.; Tang, G.; Ding, H.; Wang, Z.; Li, D.; Deng, L.; Faessler, R. *Eur. J. Org. Chem.* **2017**, 2017, 6604.
6. Huang, H.; Dang, P.; Wu, L.; Liang, Y.; Liu, J. *Tetrahedron Lett.* **2016**, 57, 574.

## 5. NMR spectra

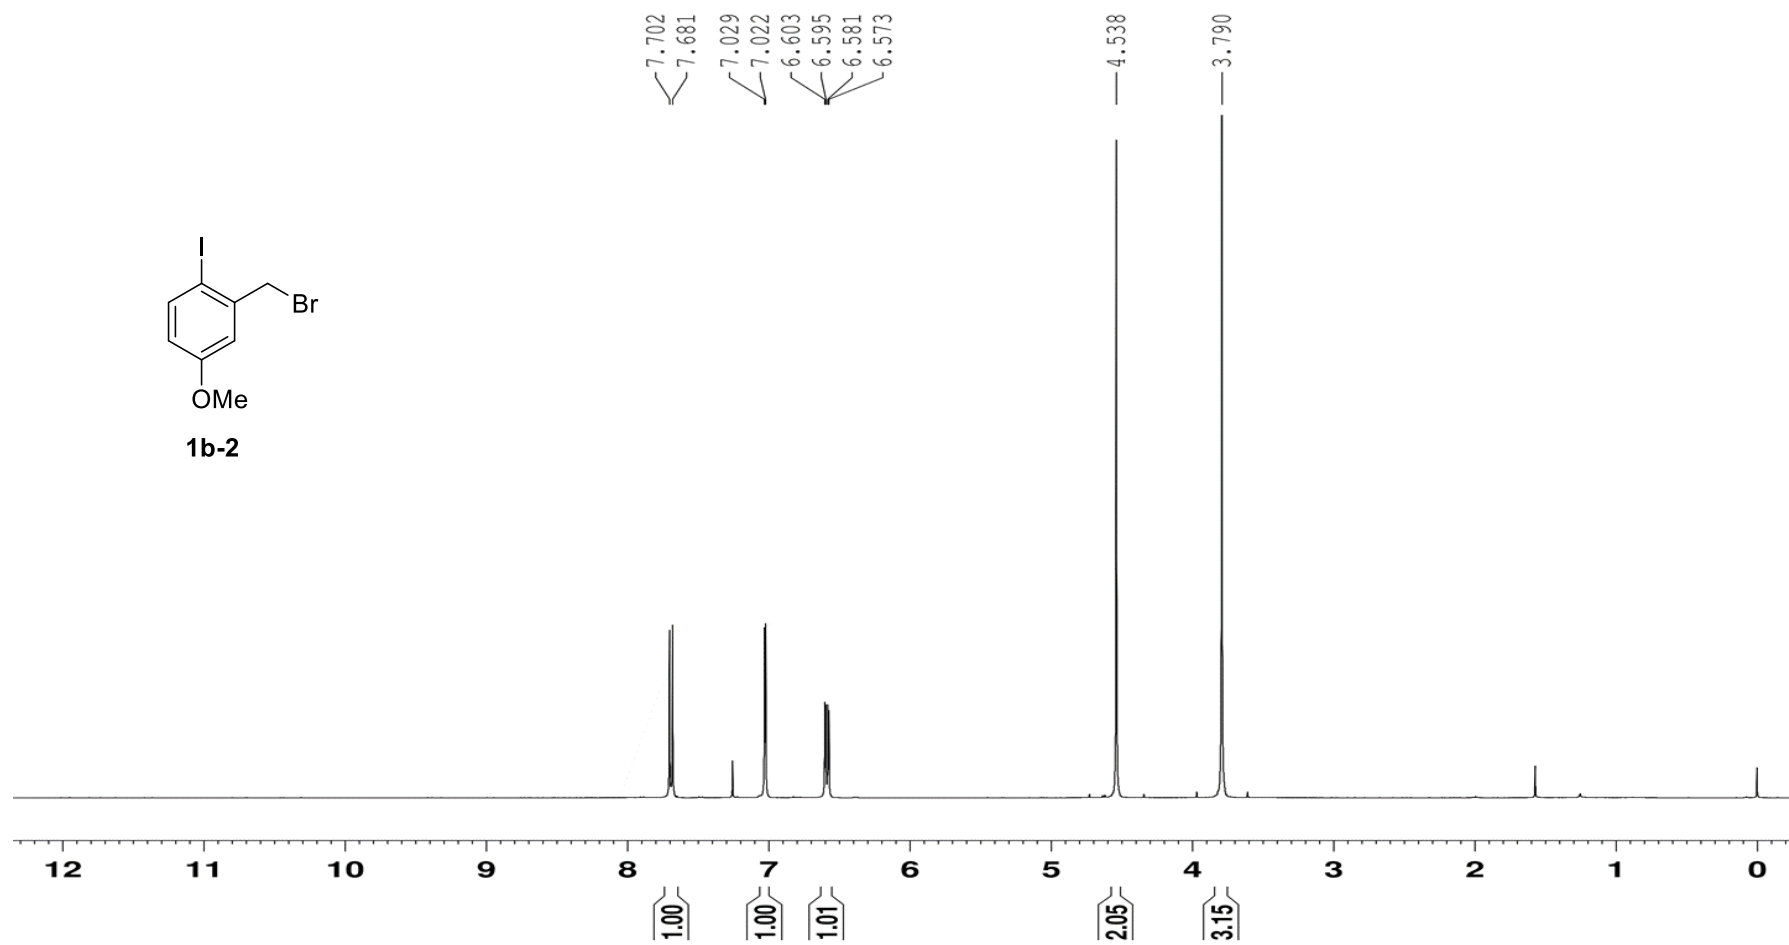

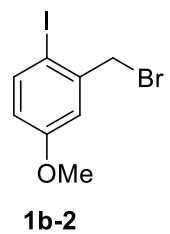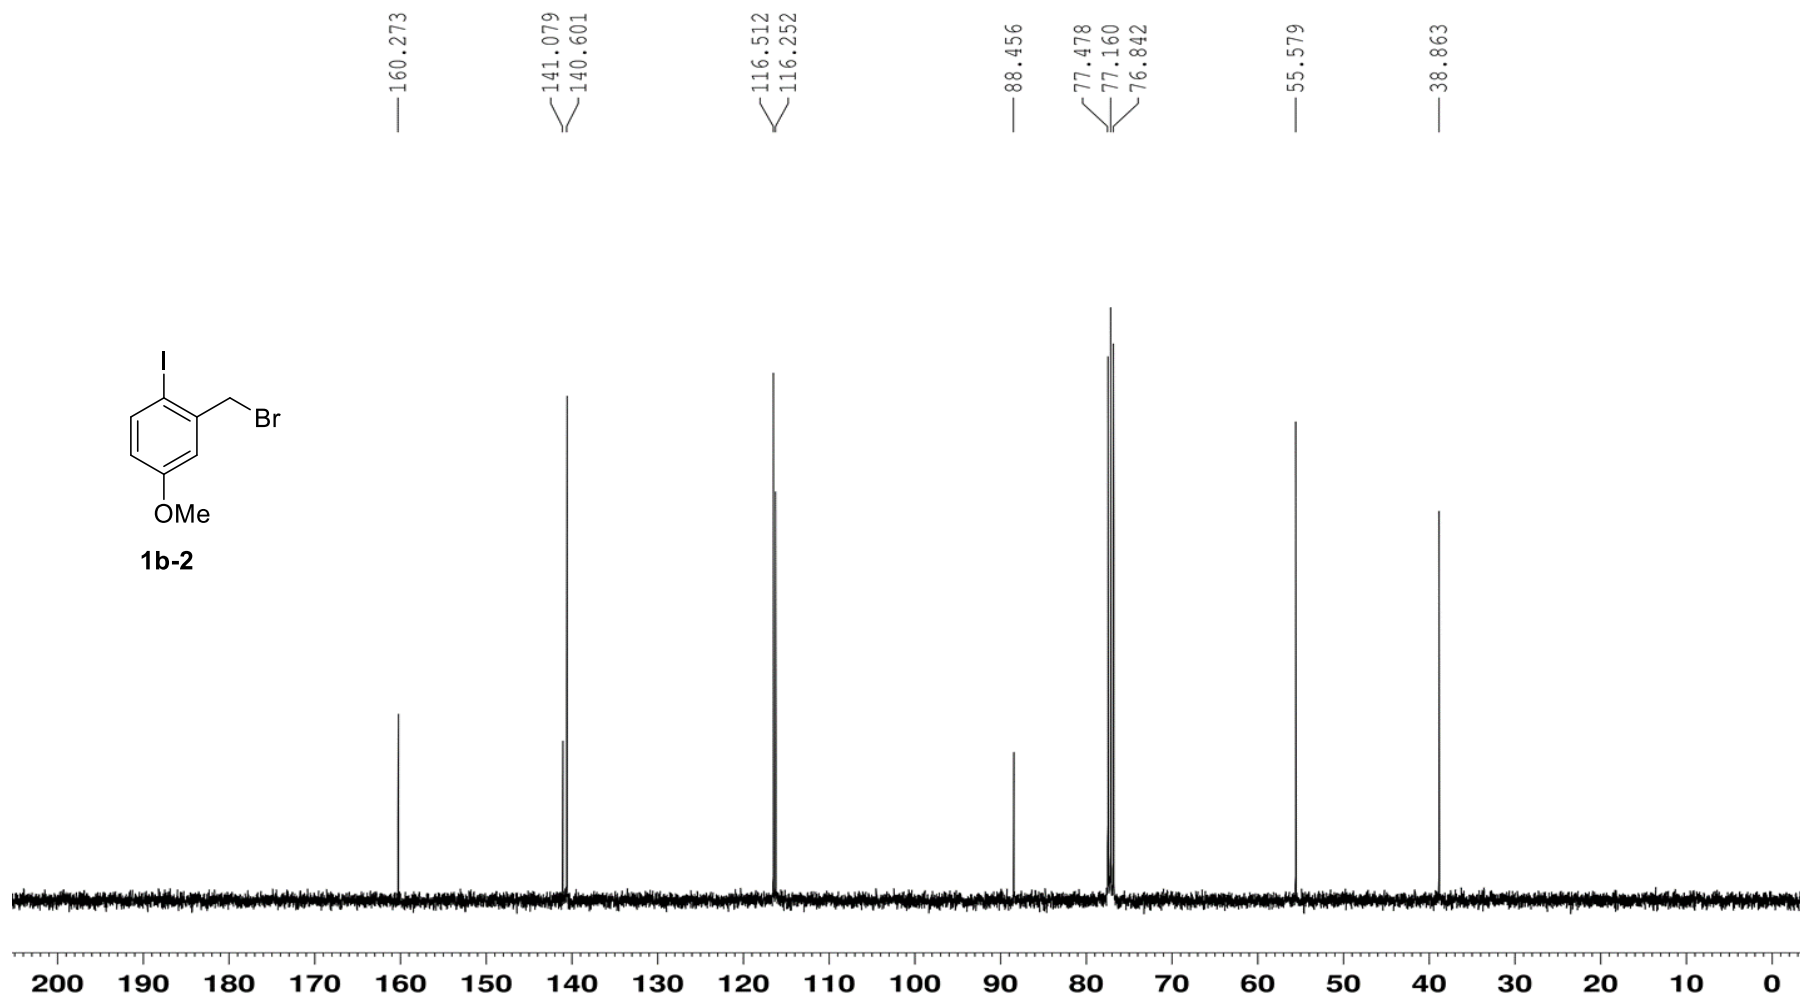

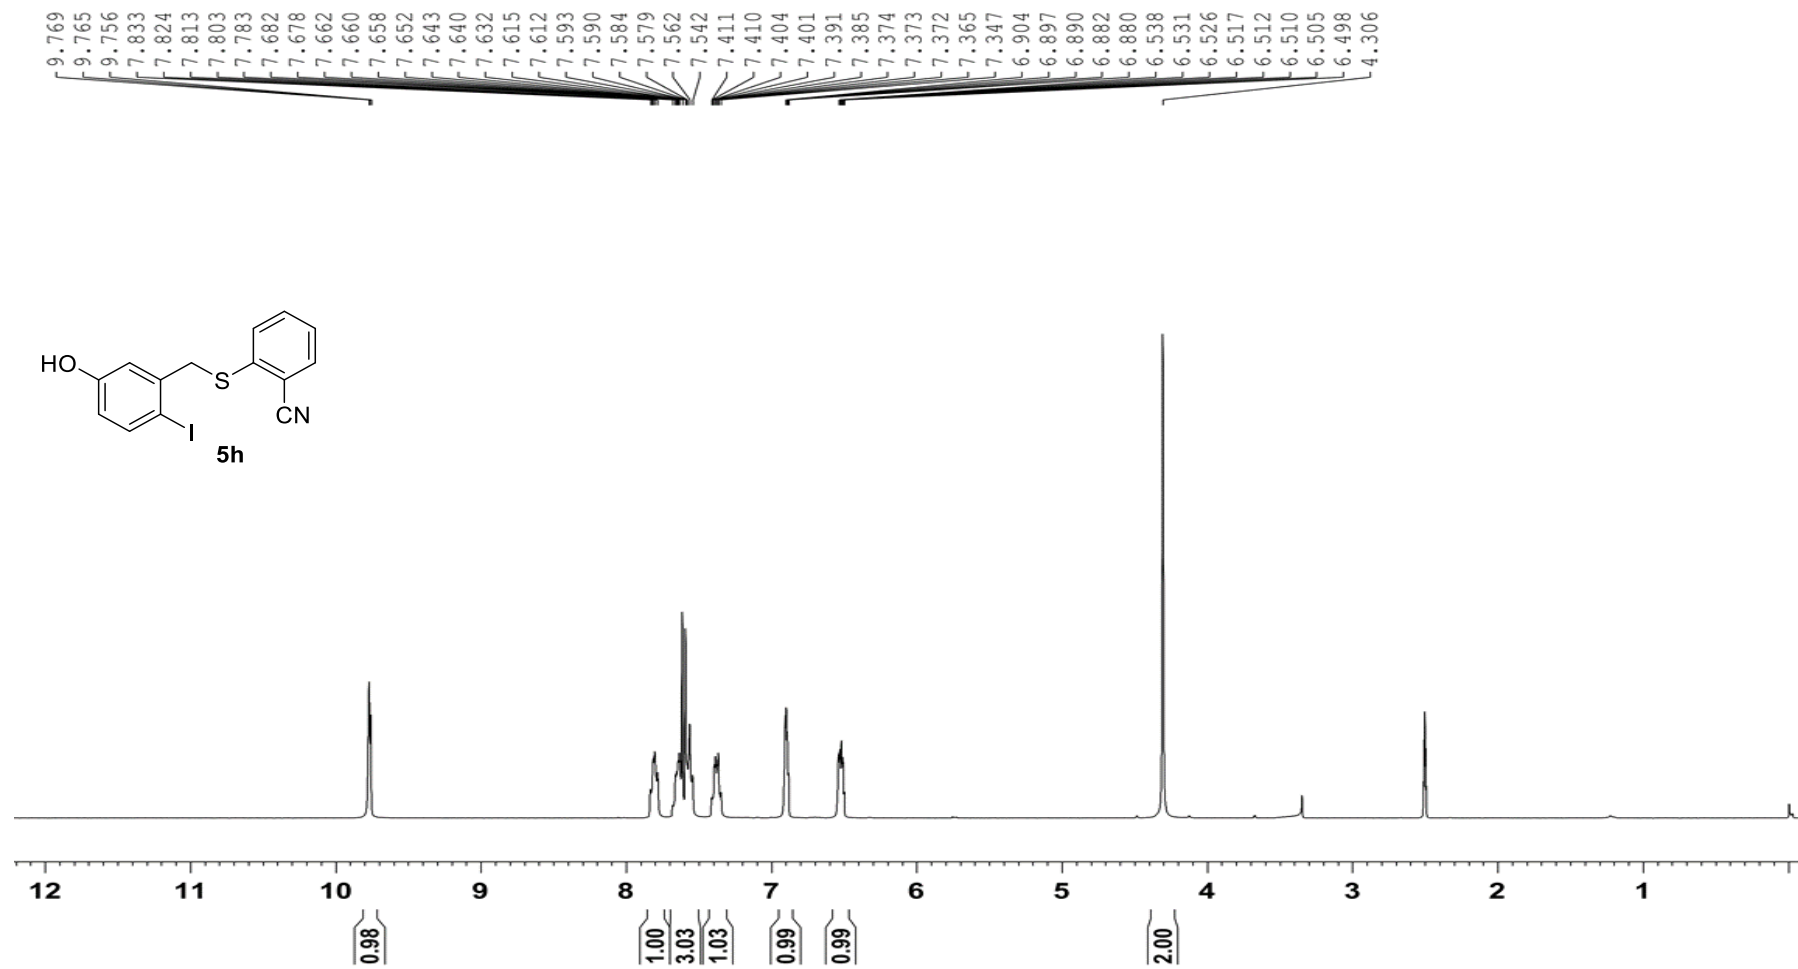



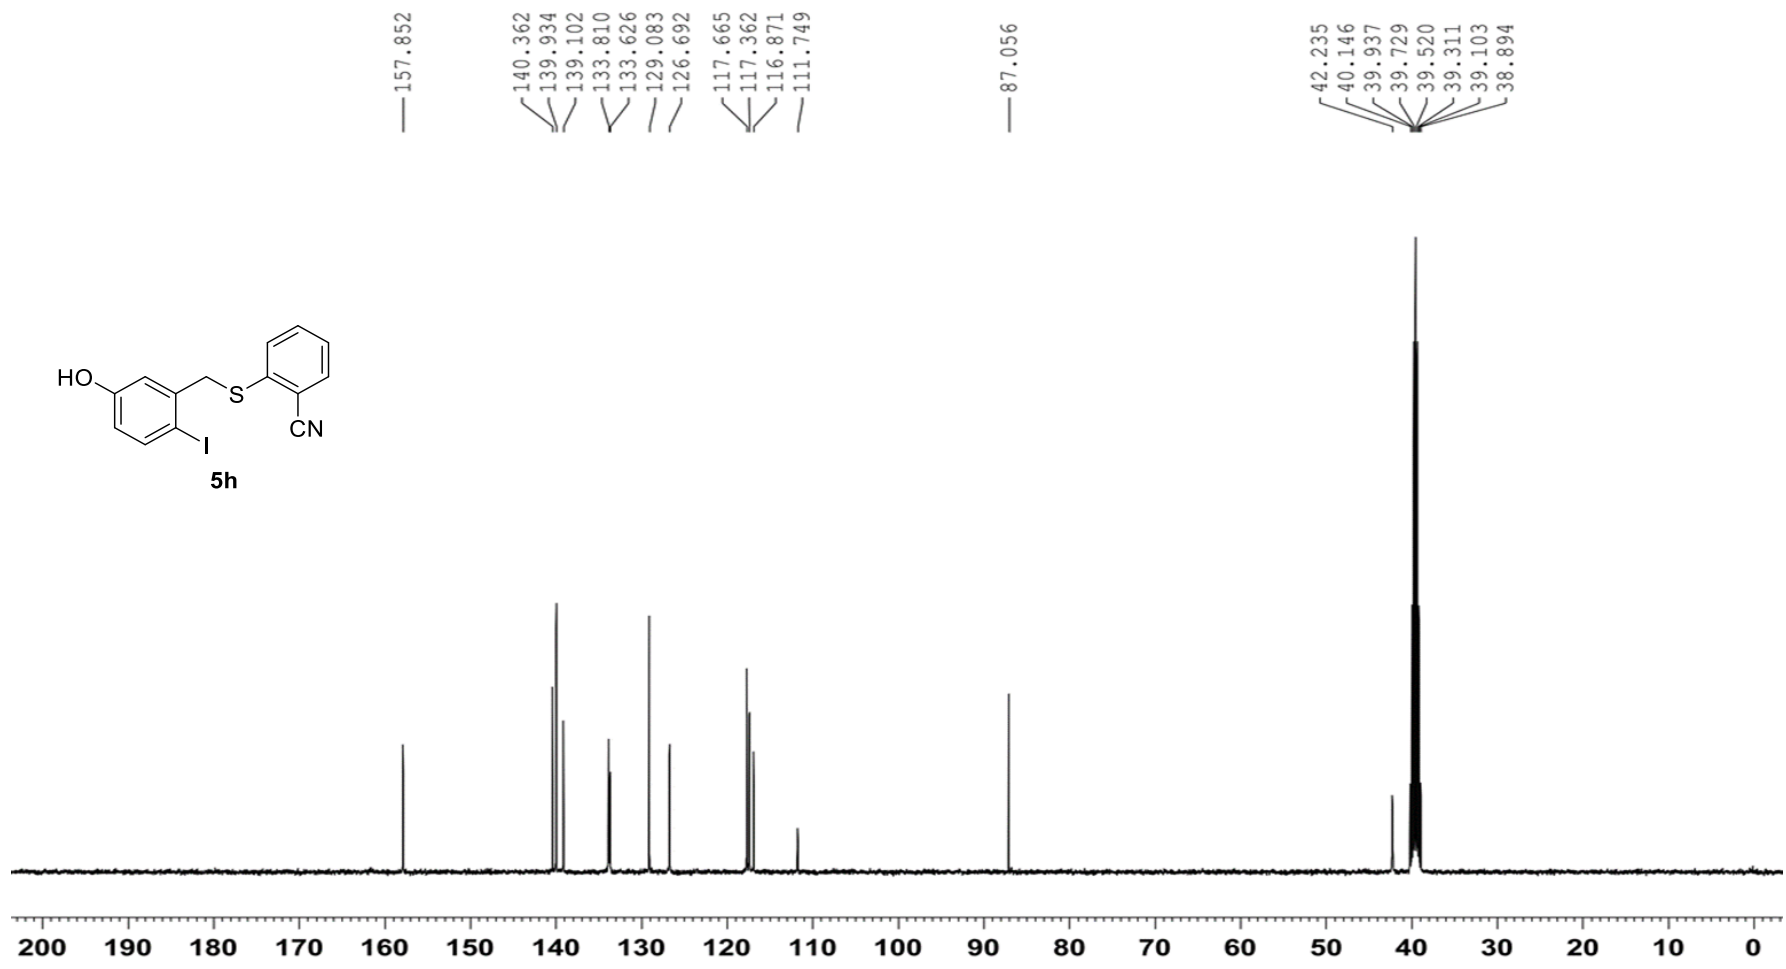

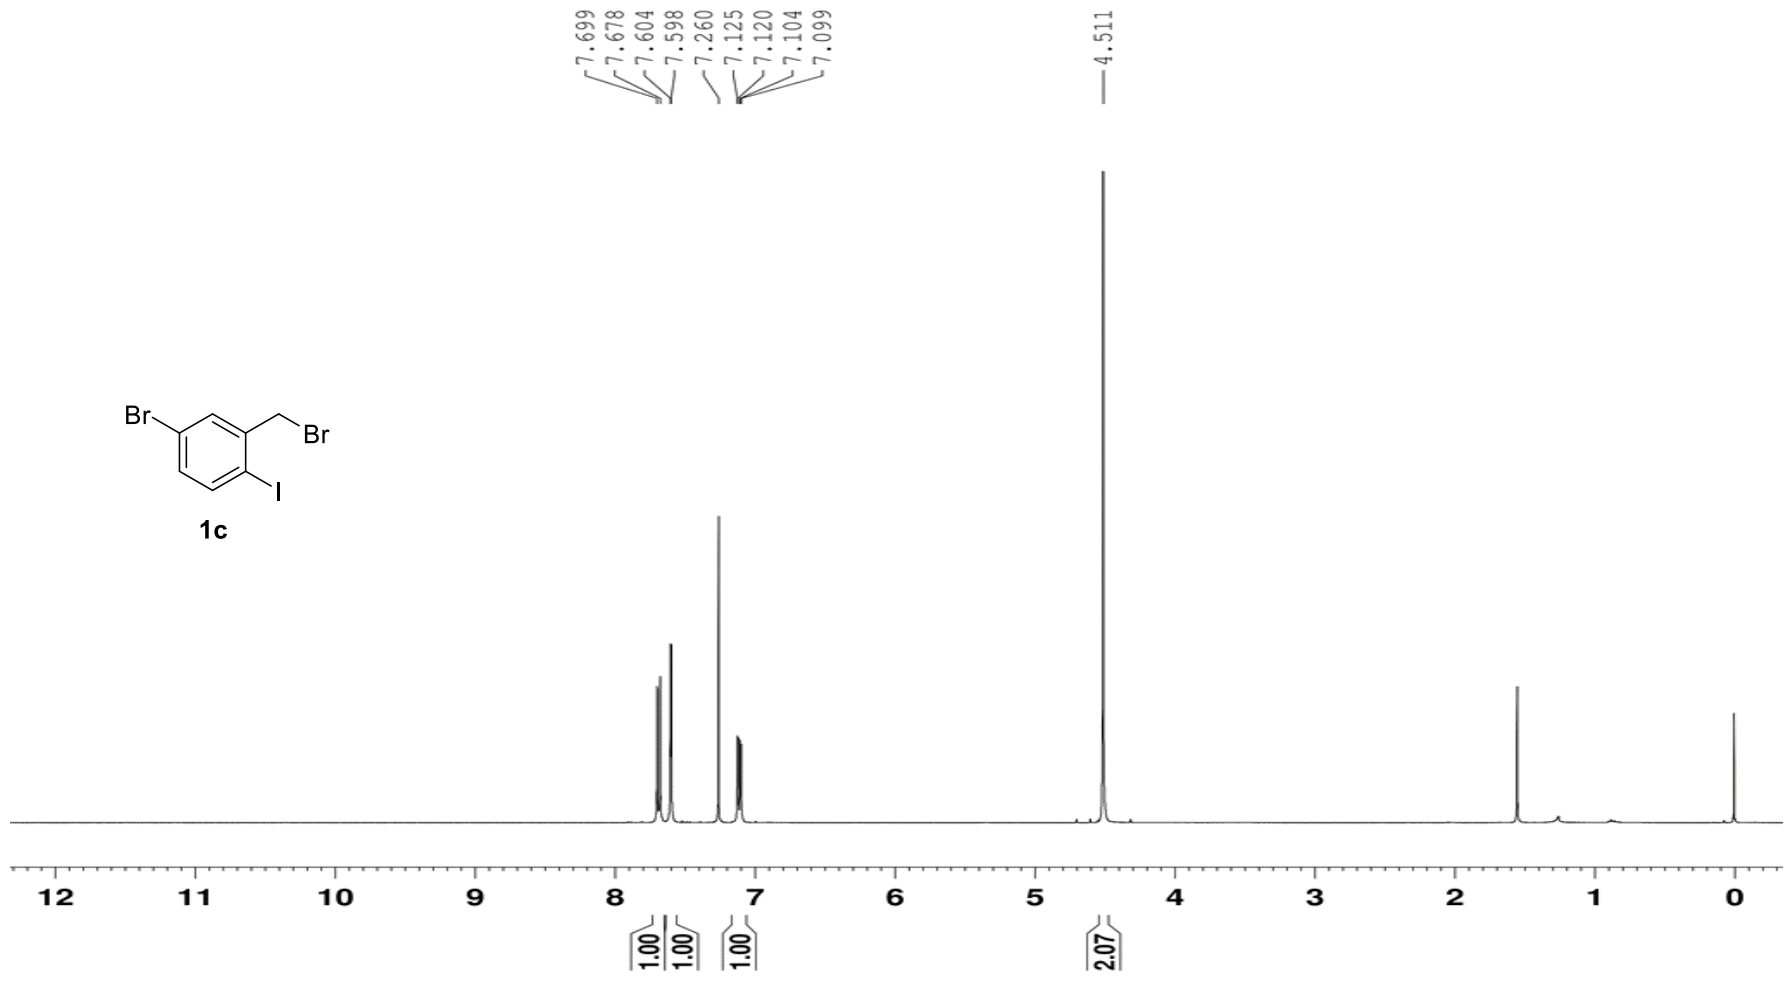

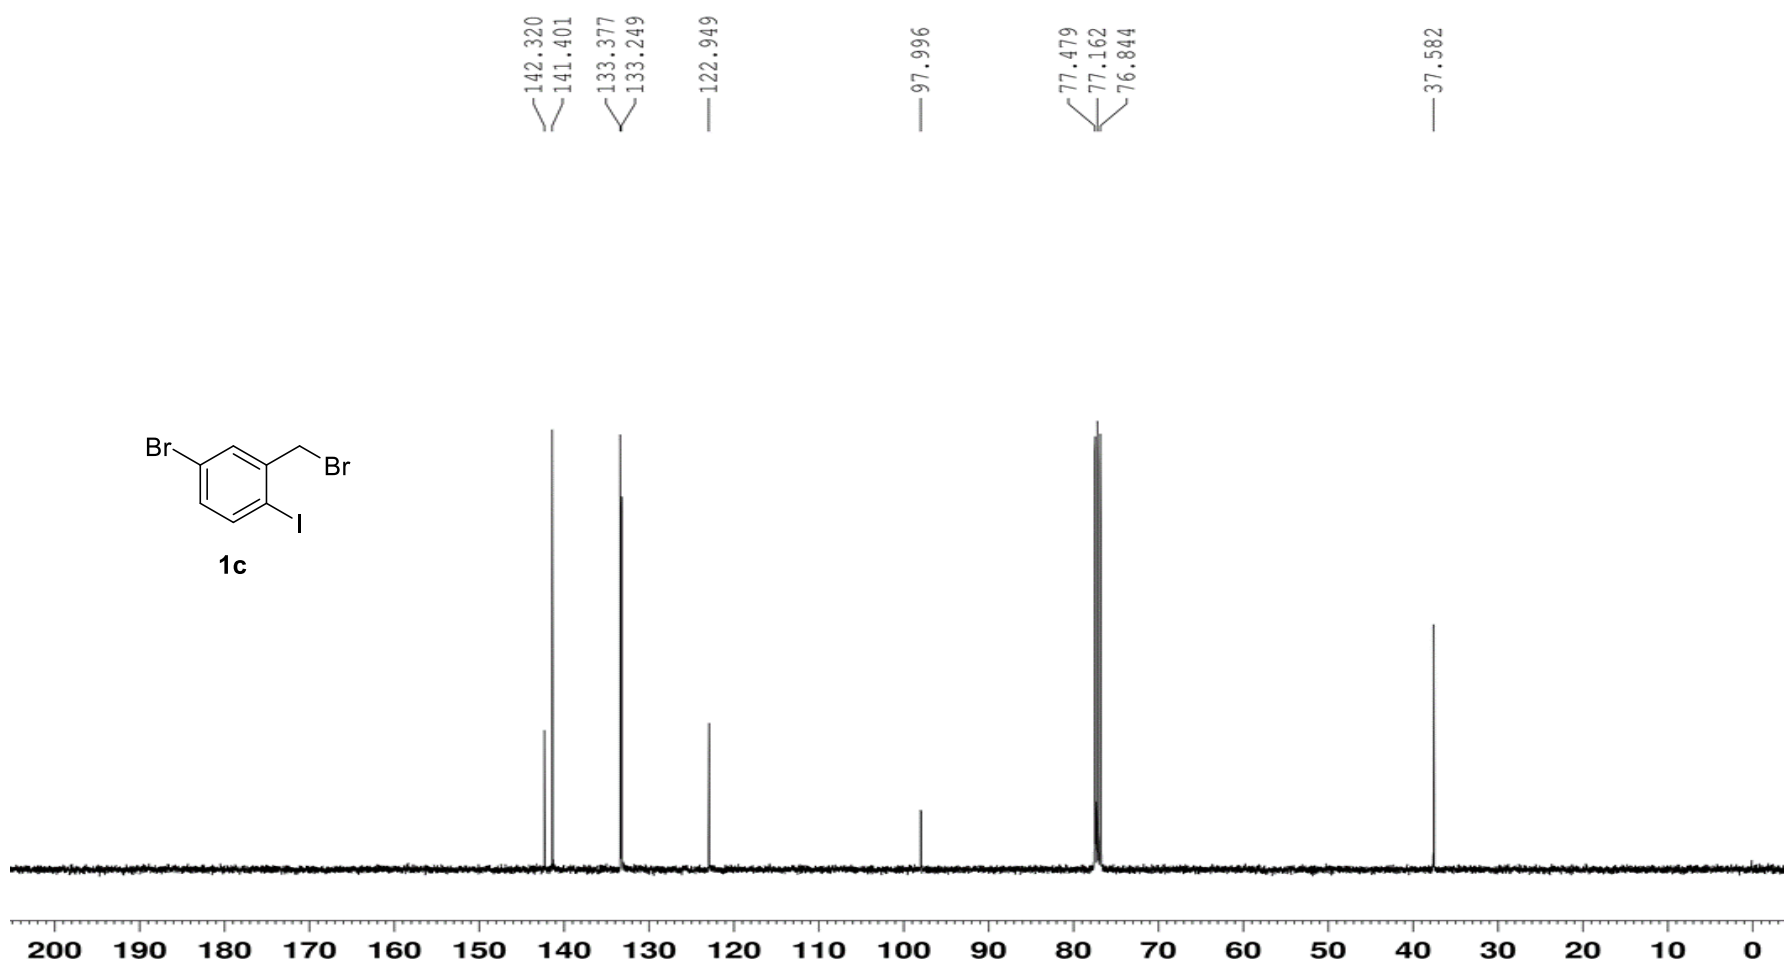

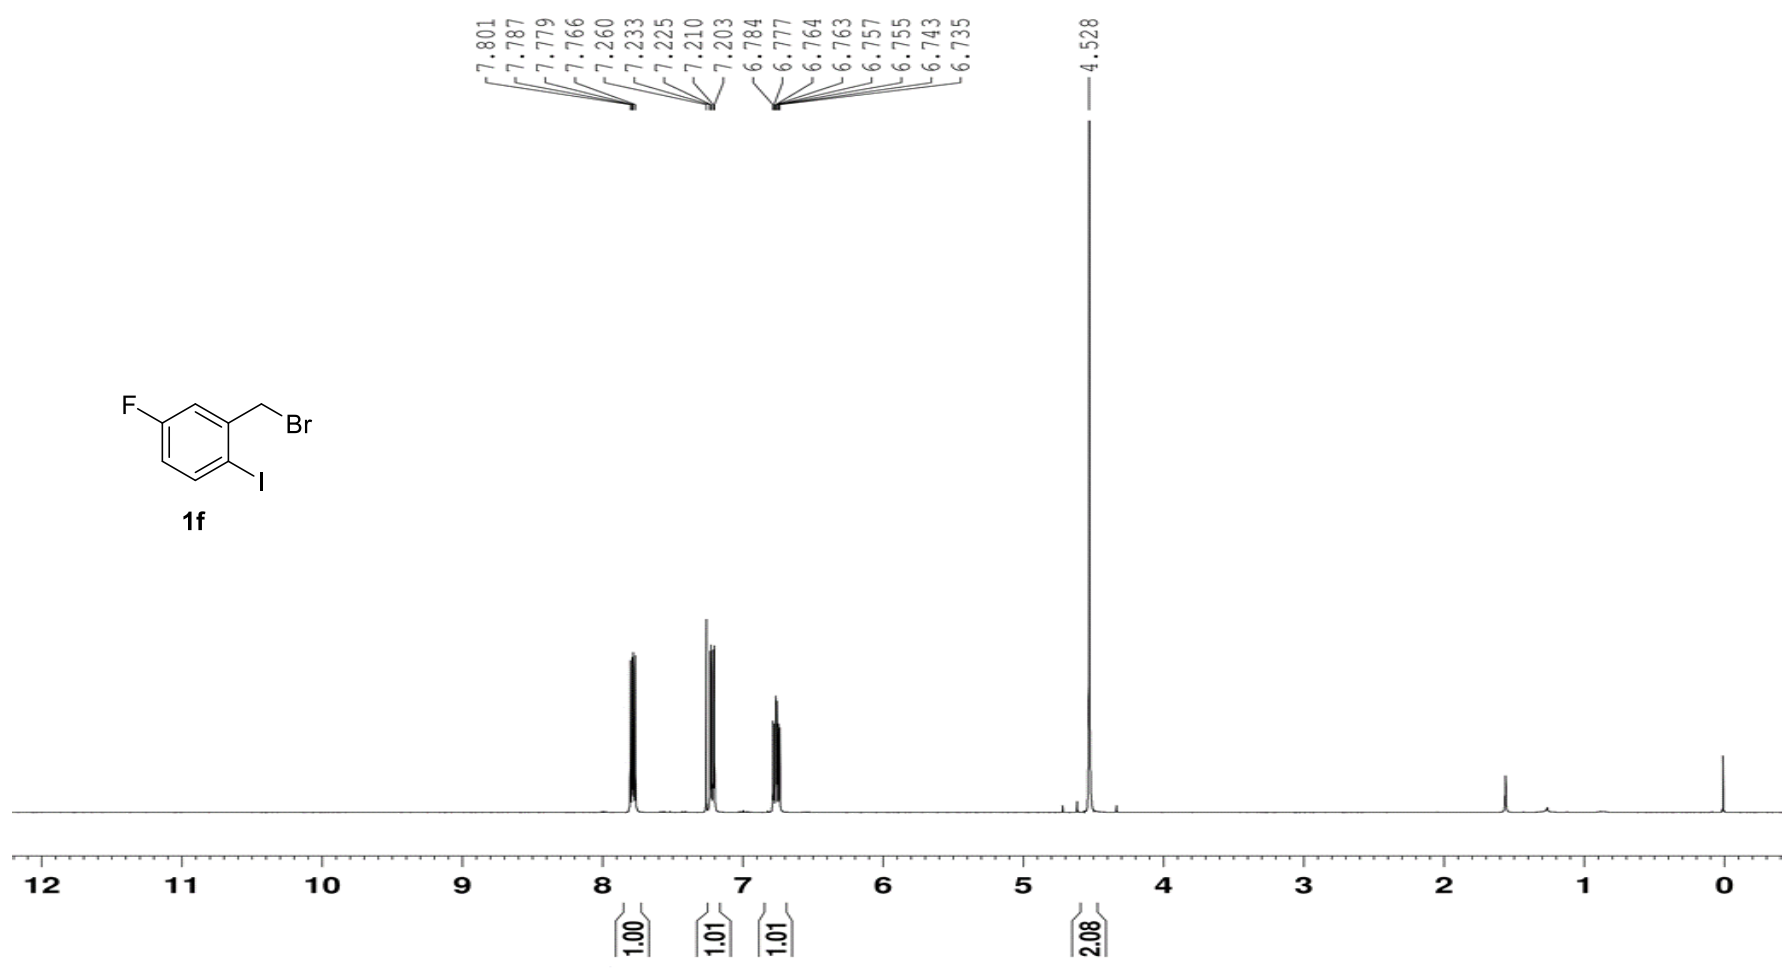

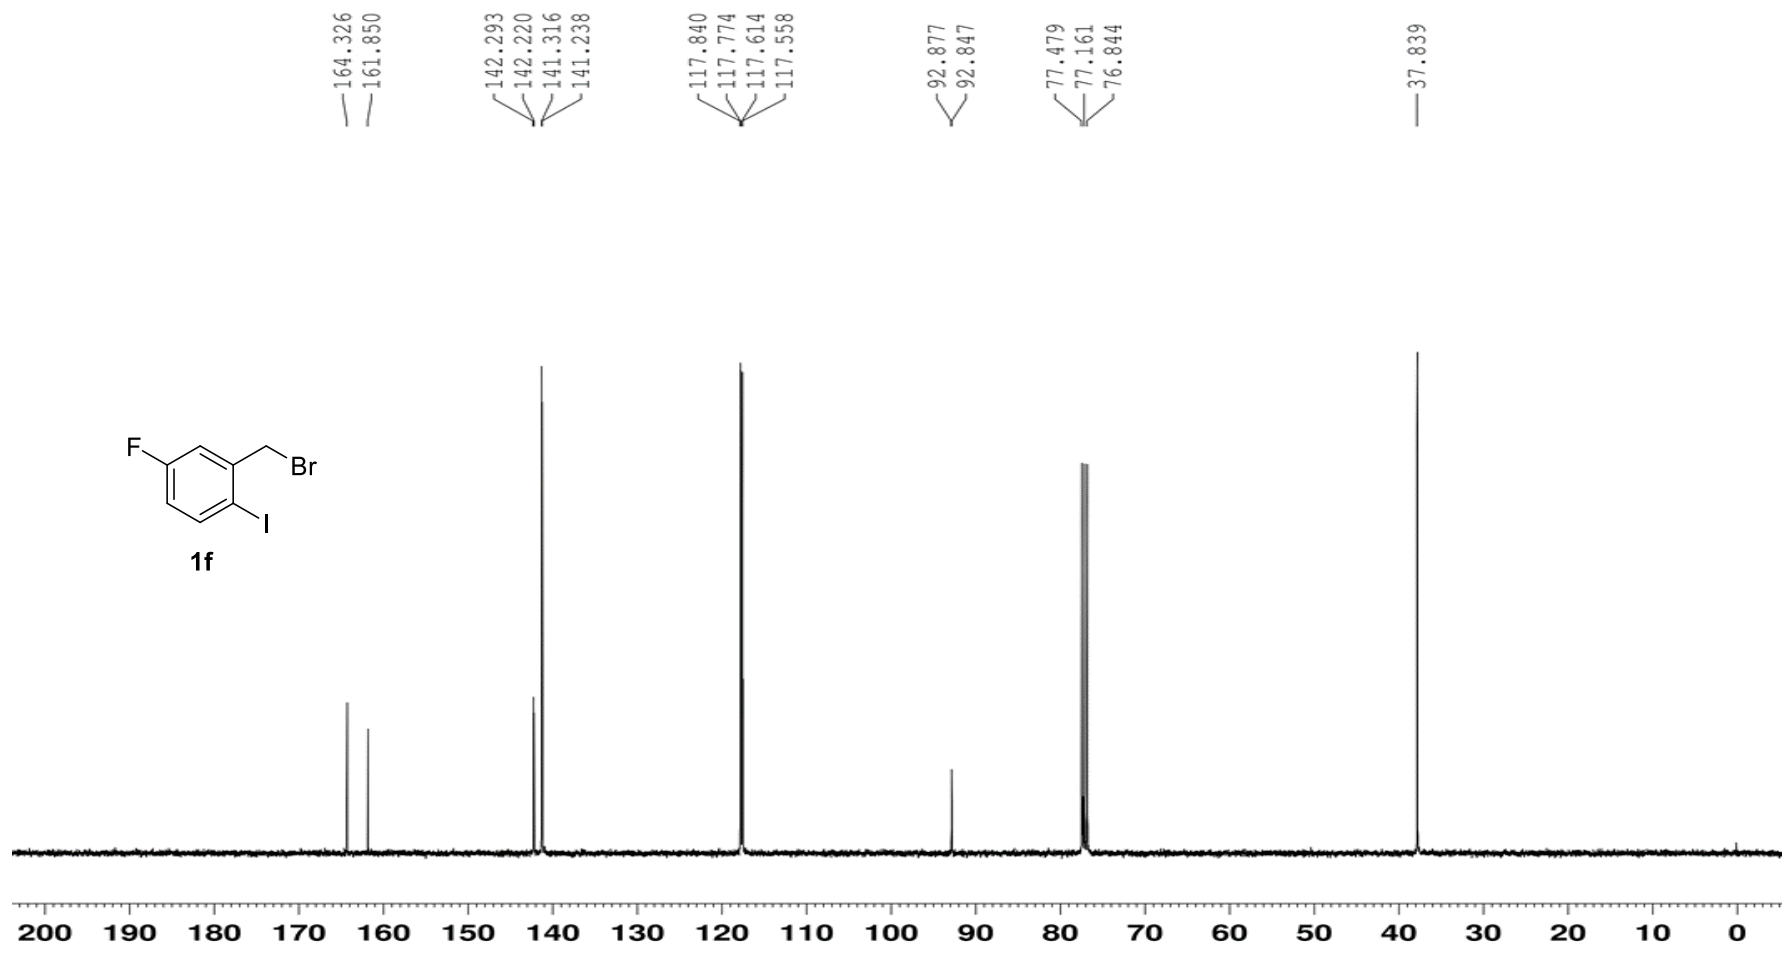

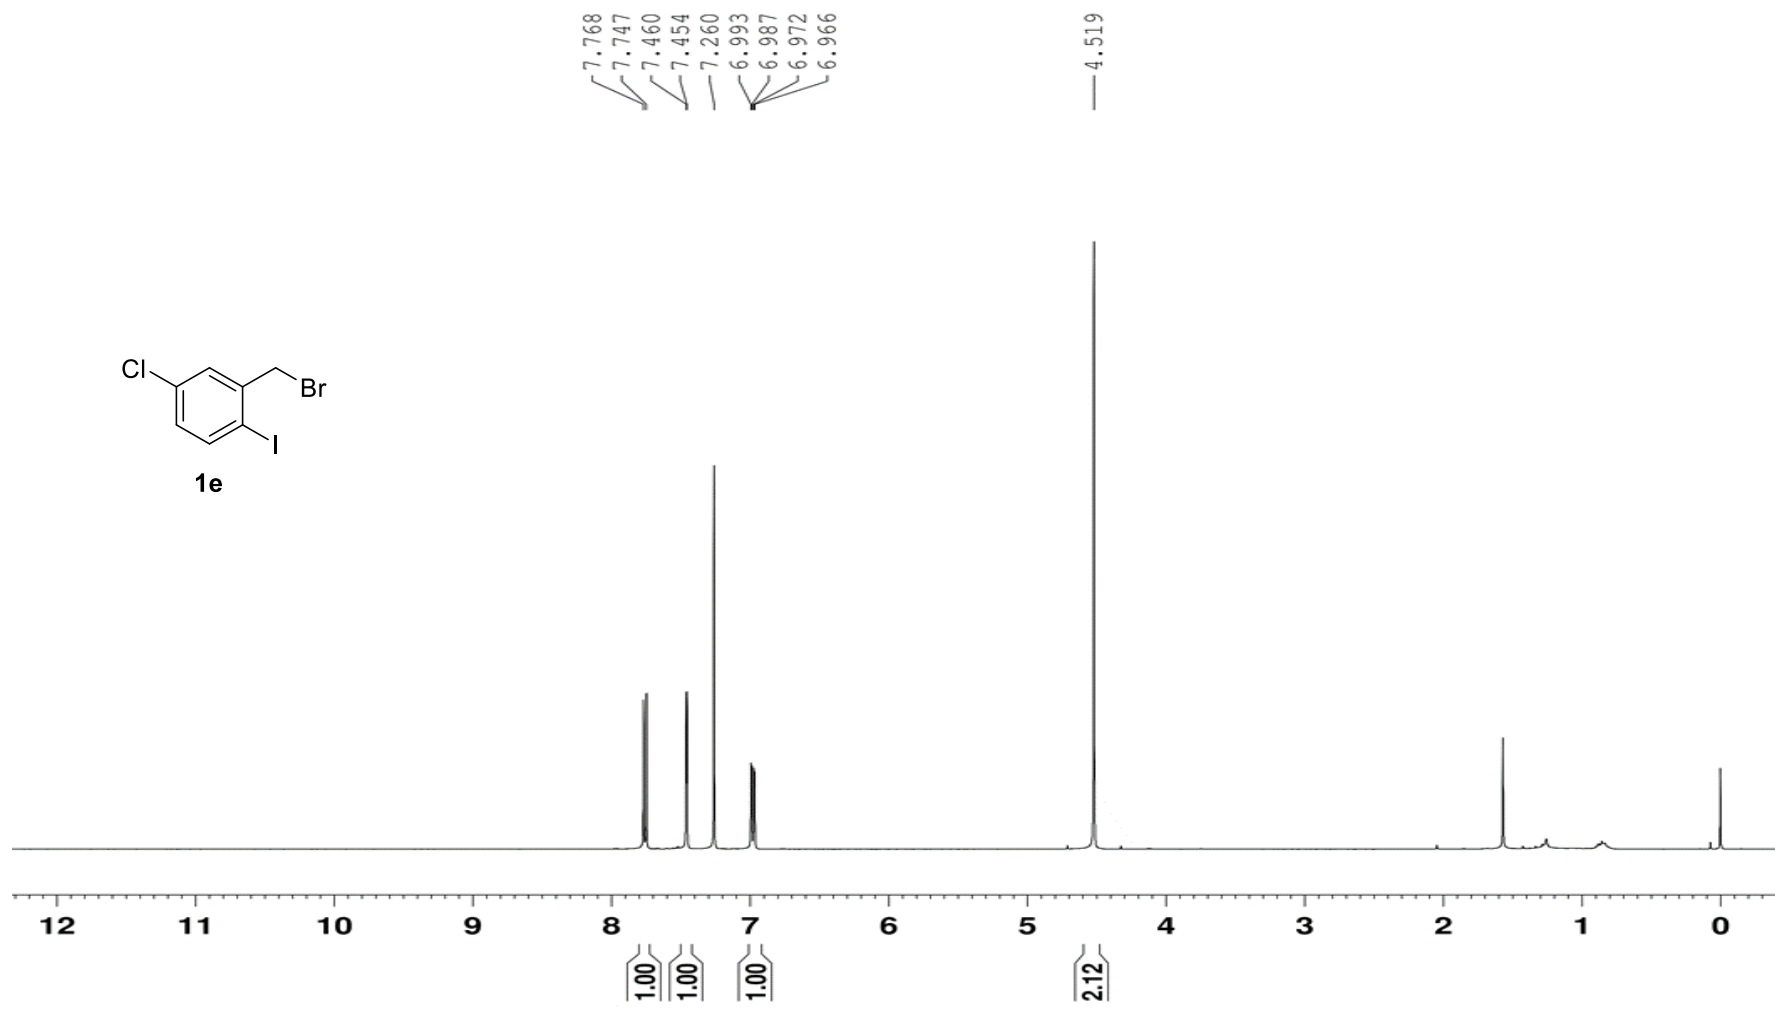

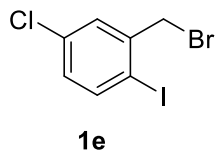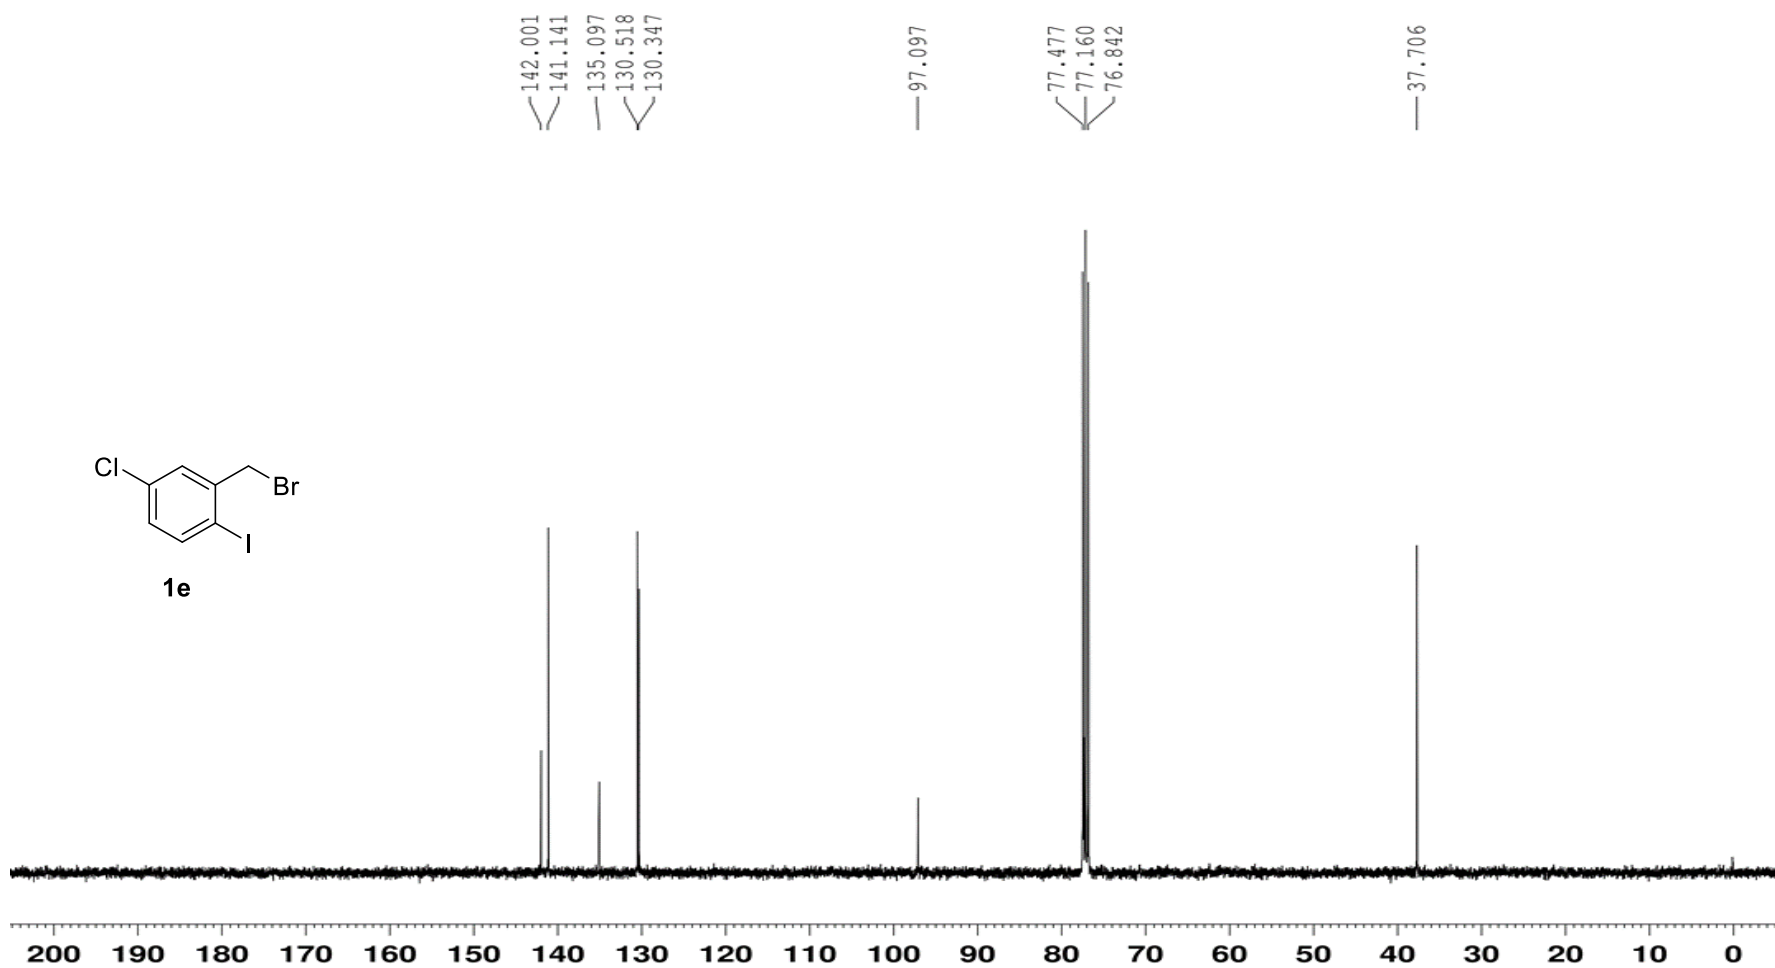

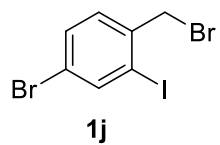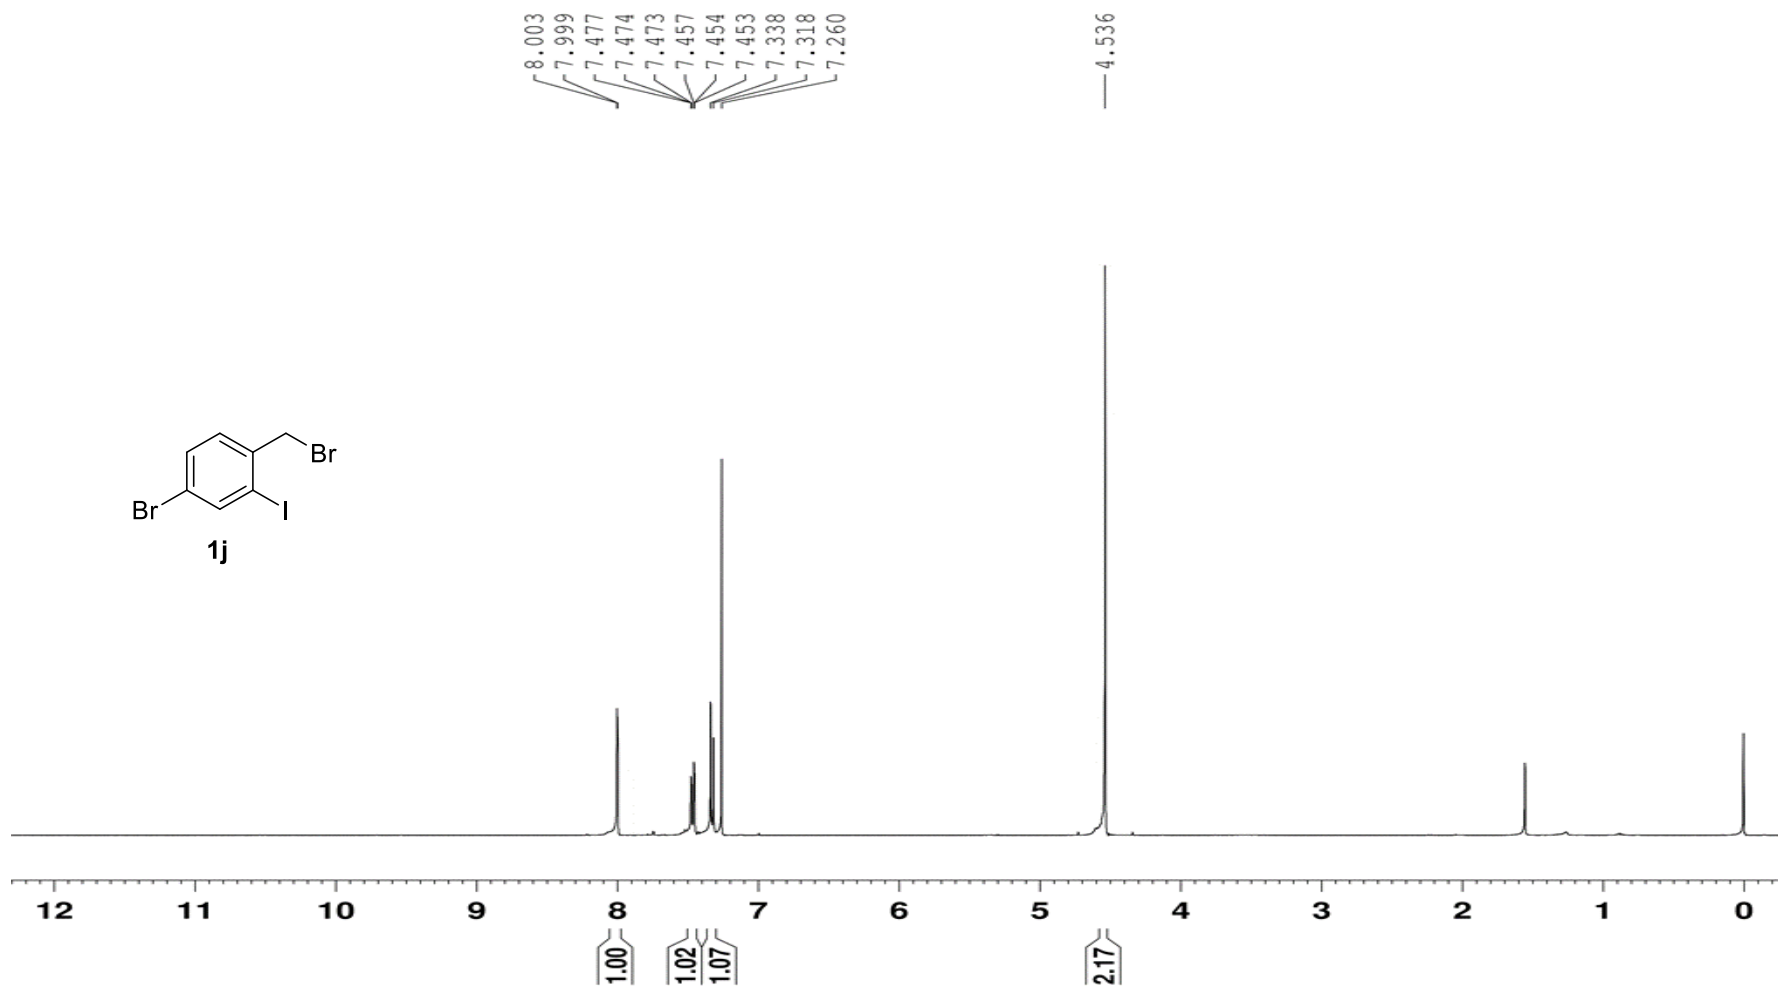



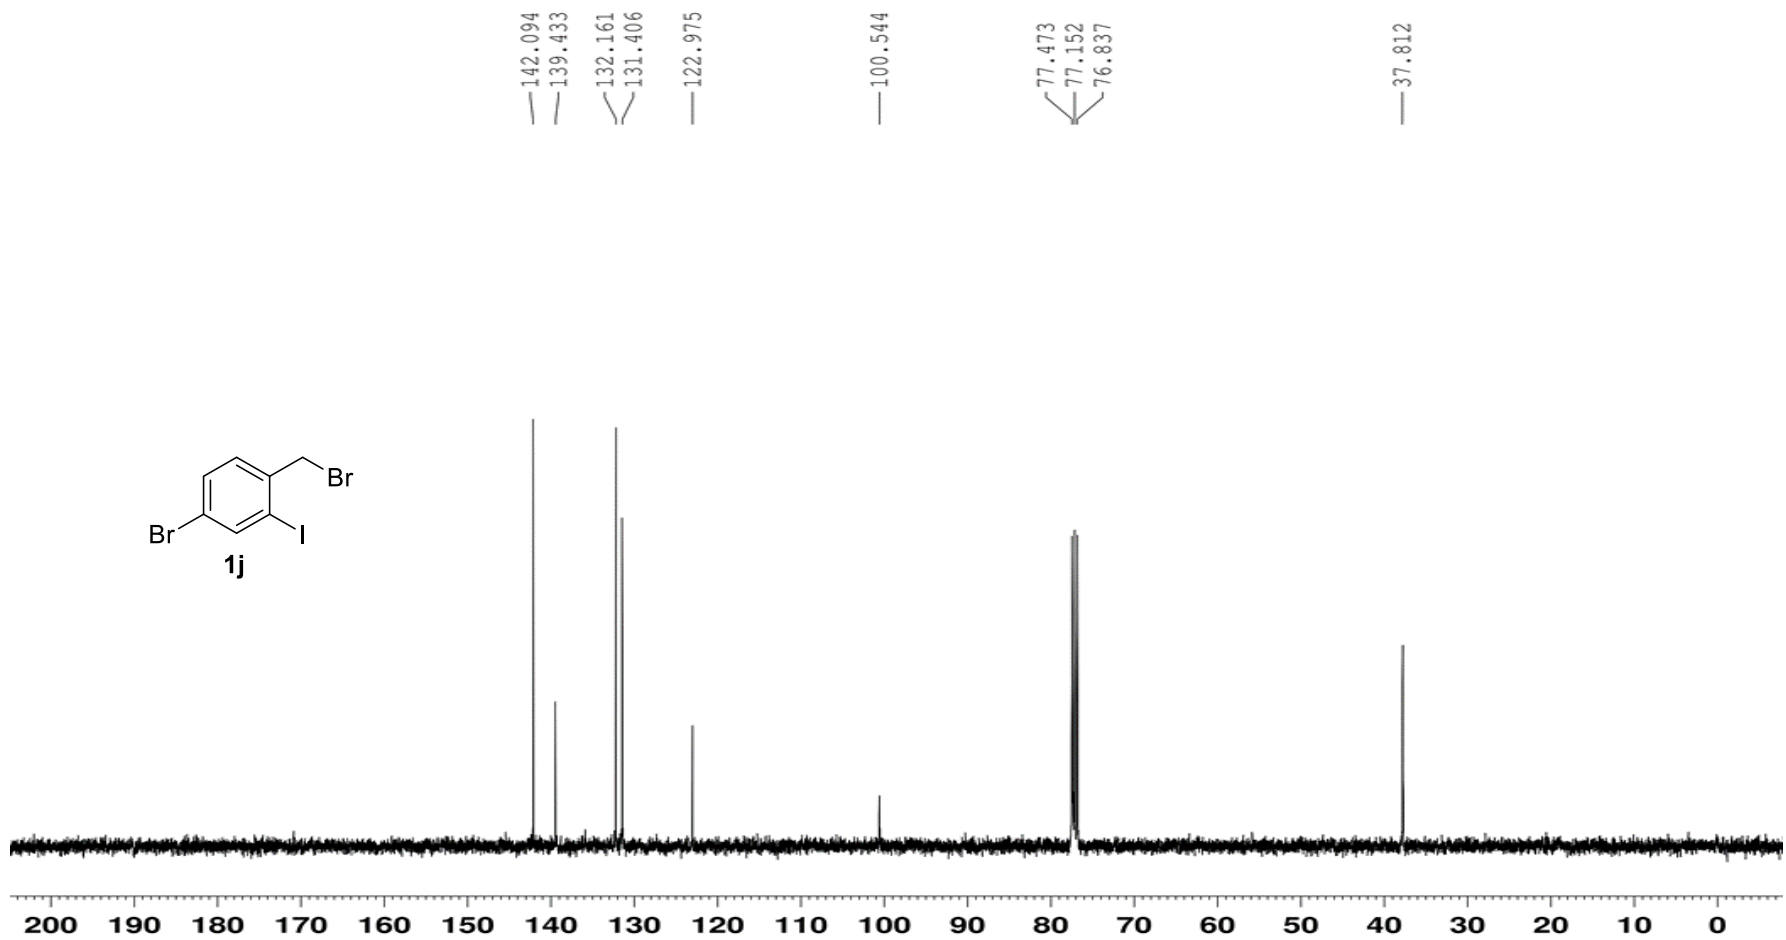

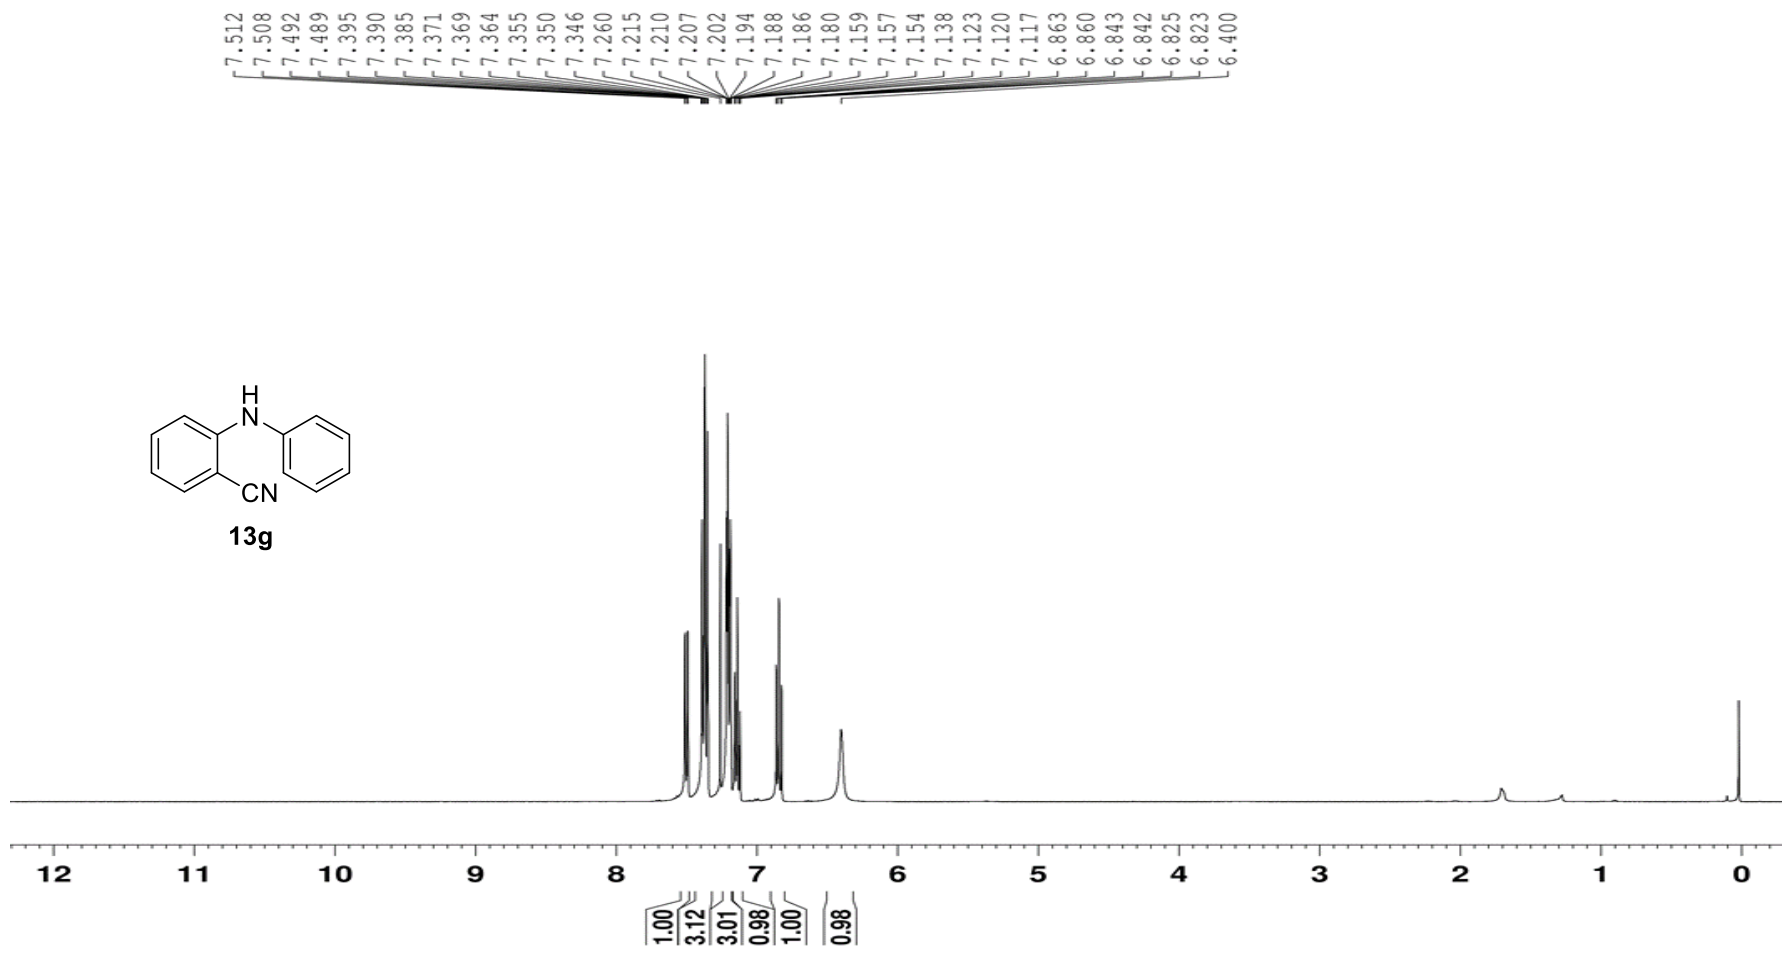

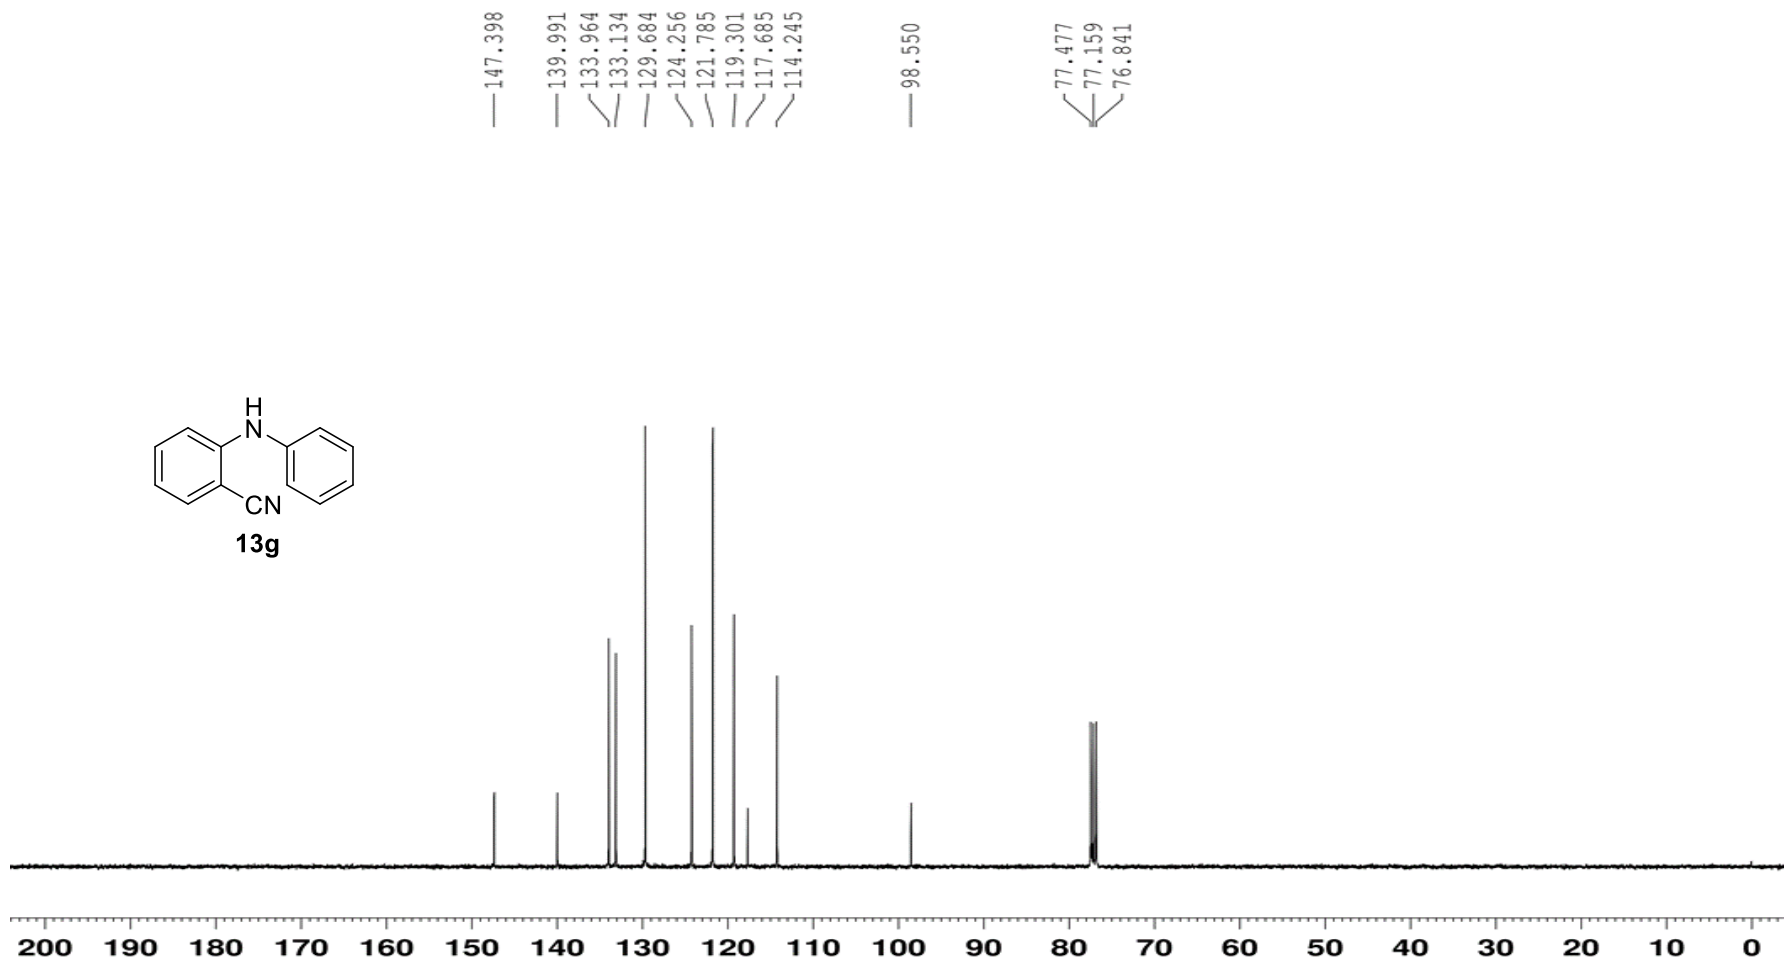

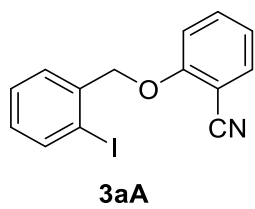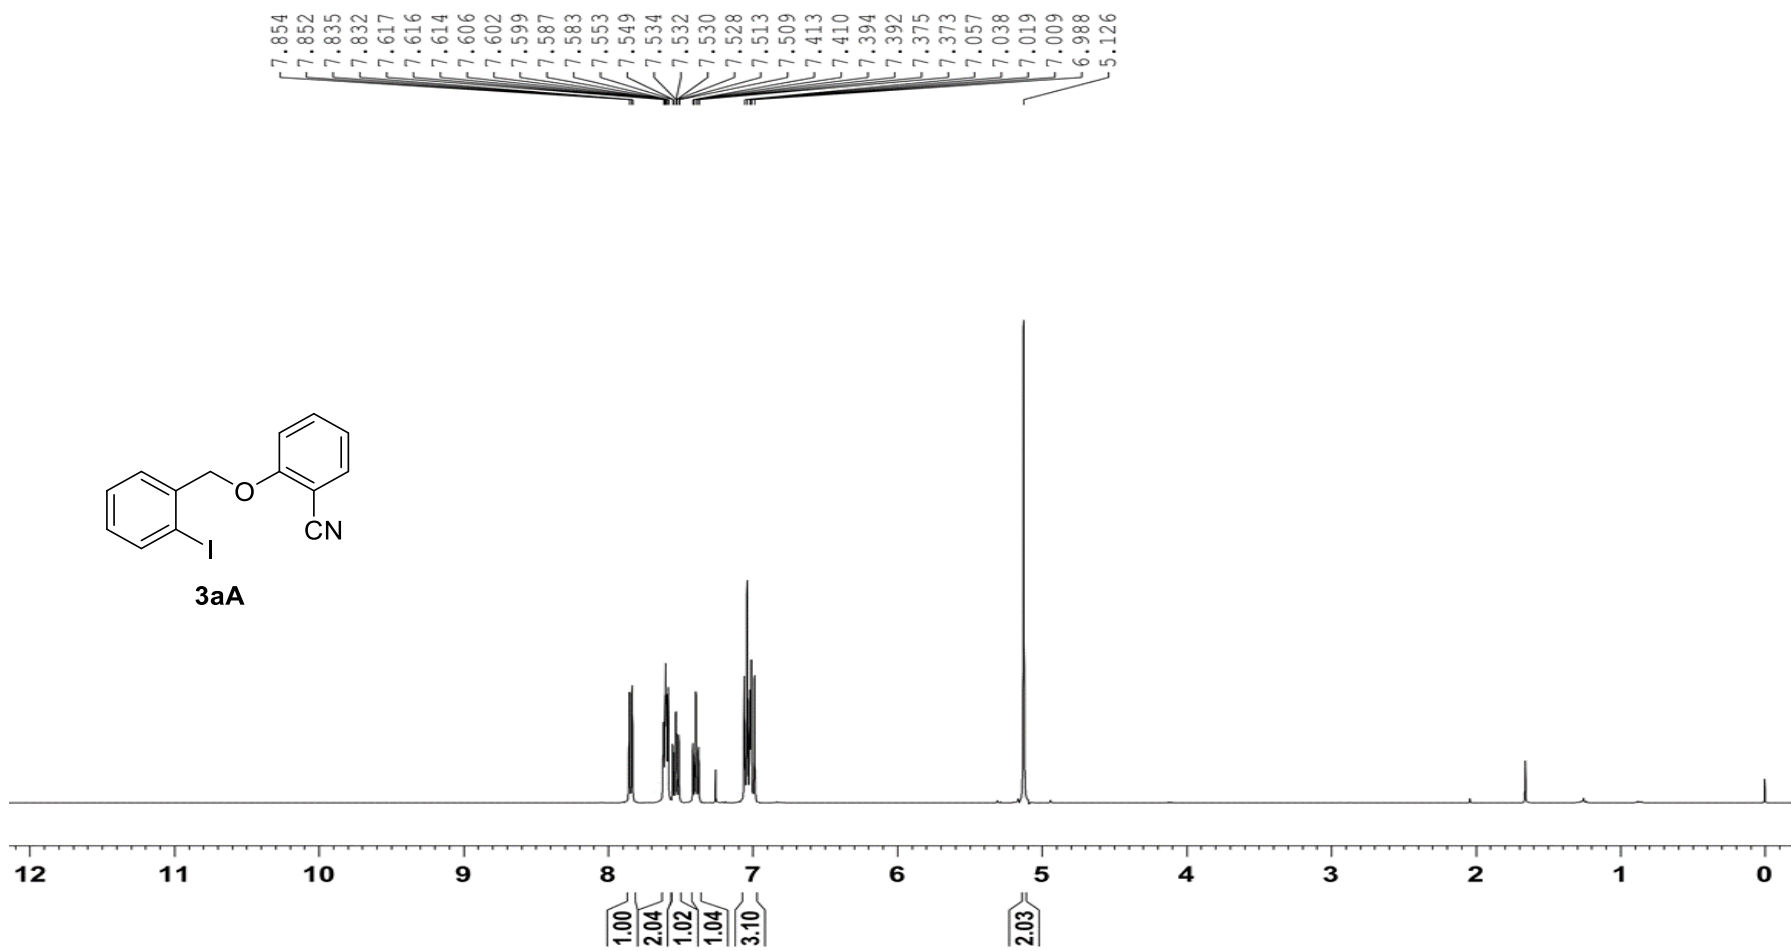

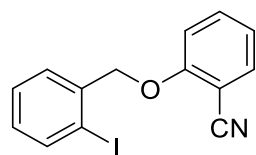

3aA

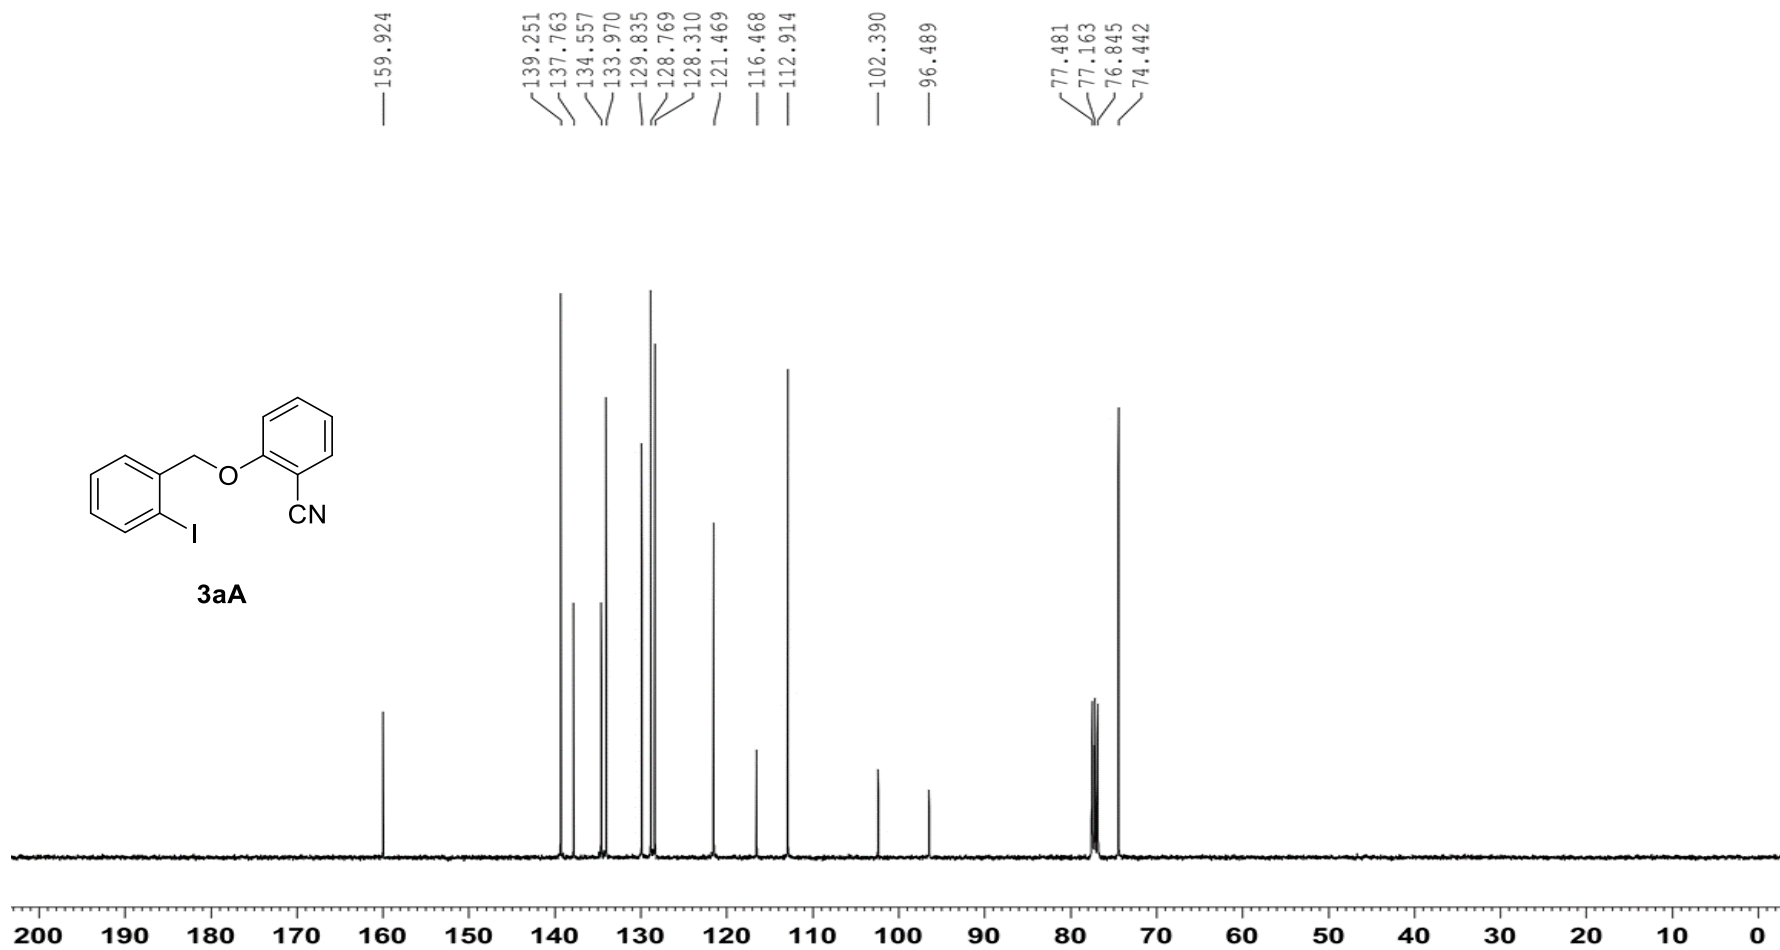

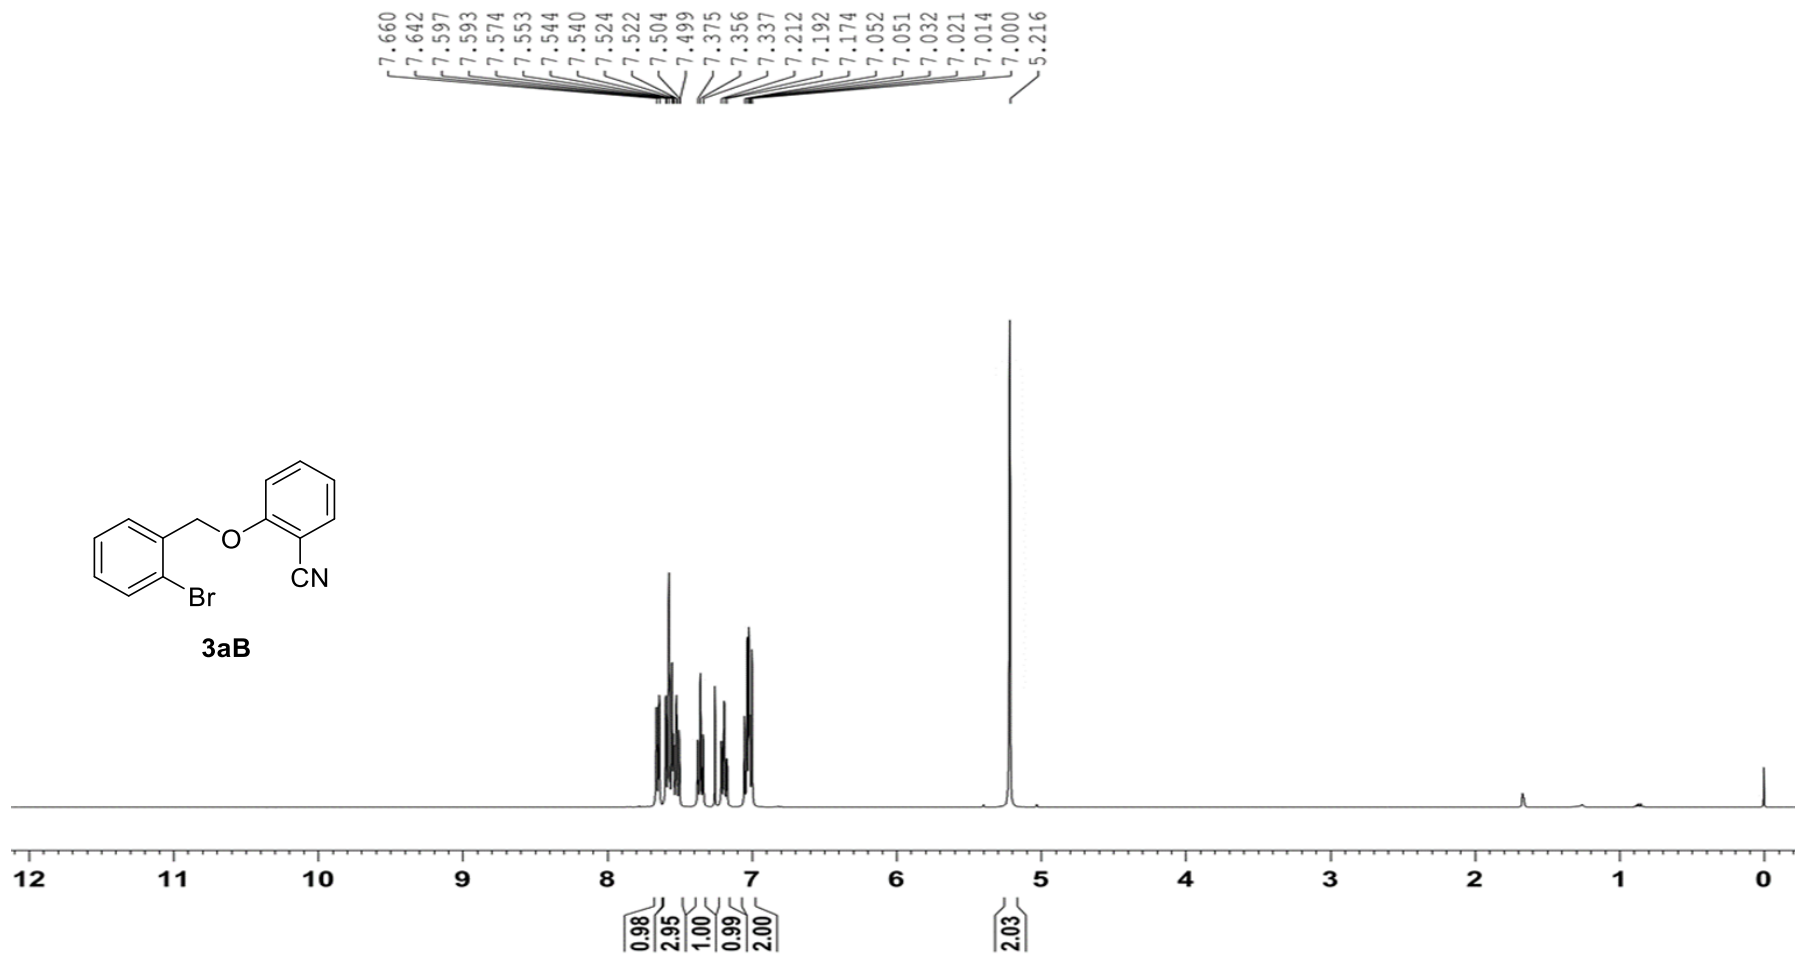

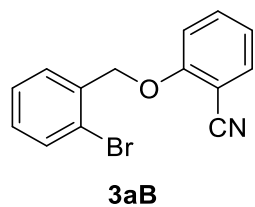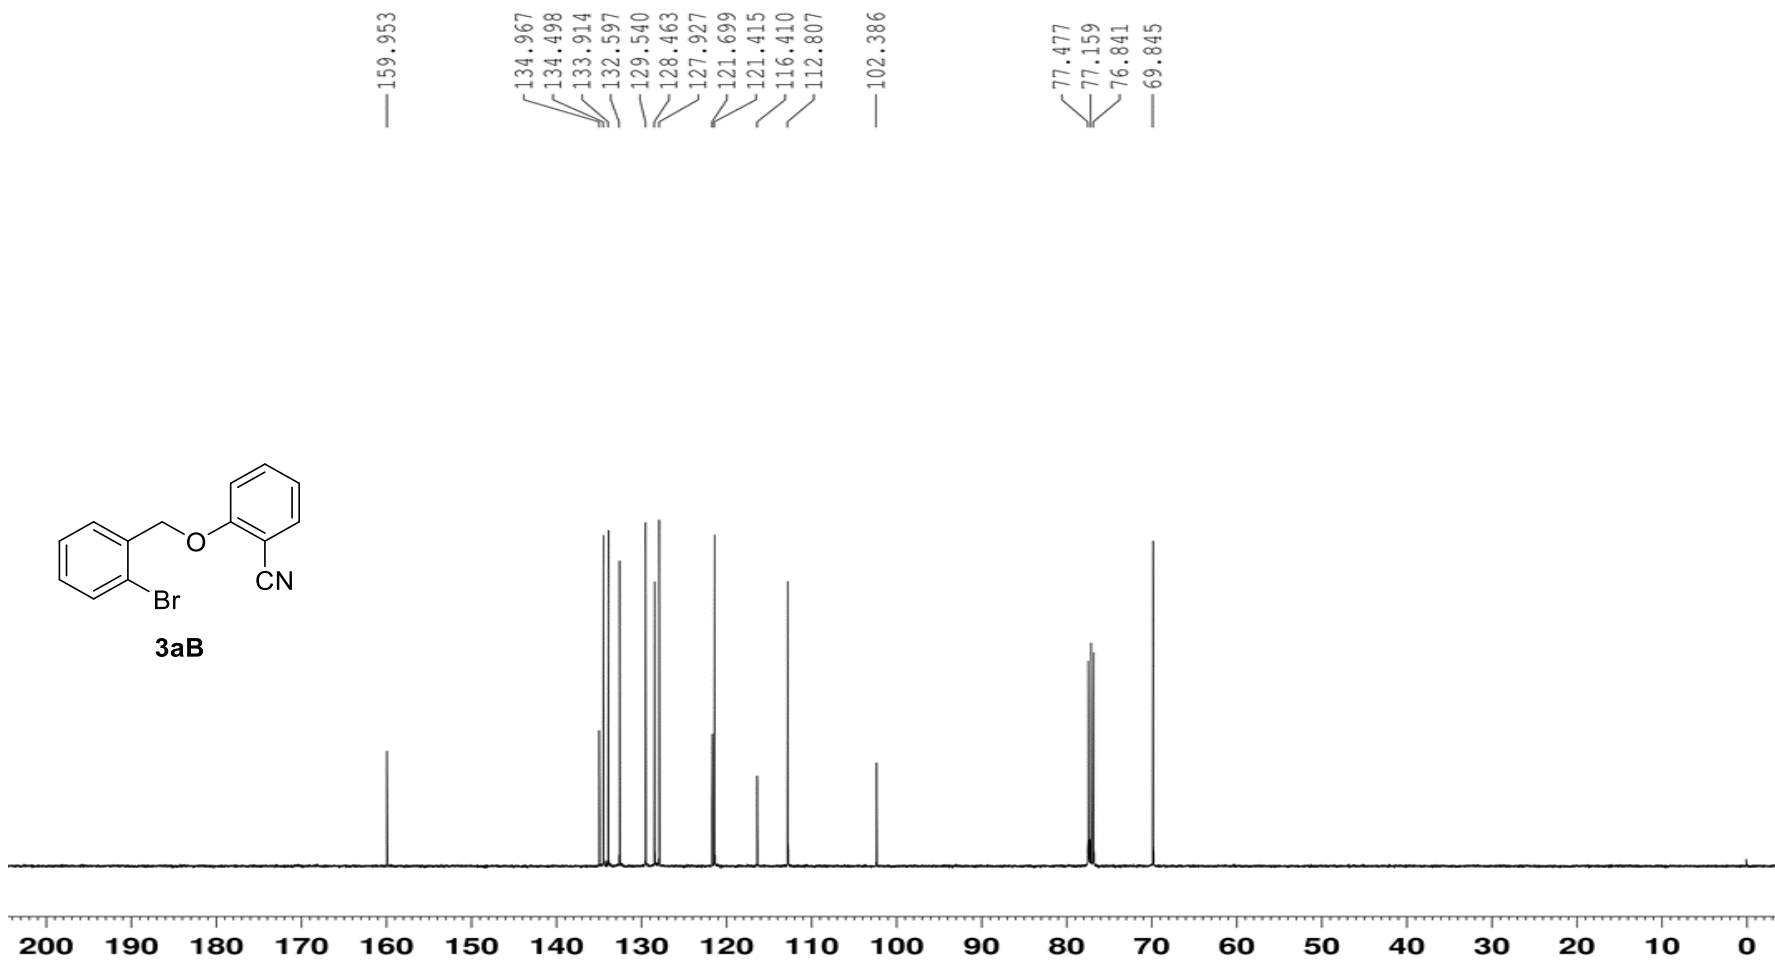

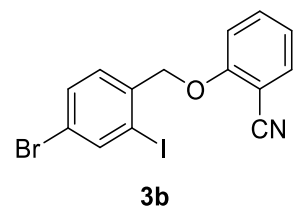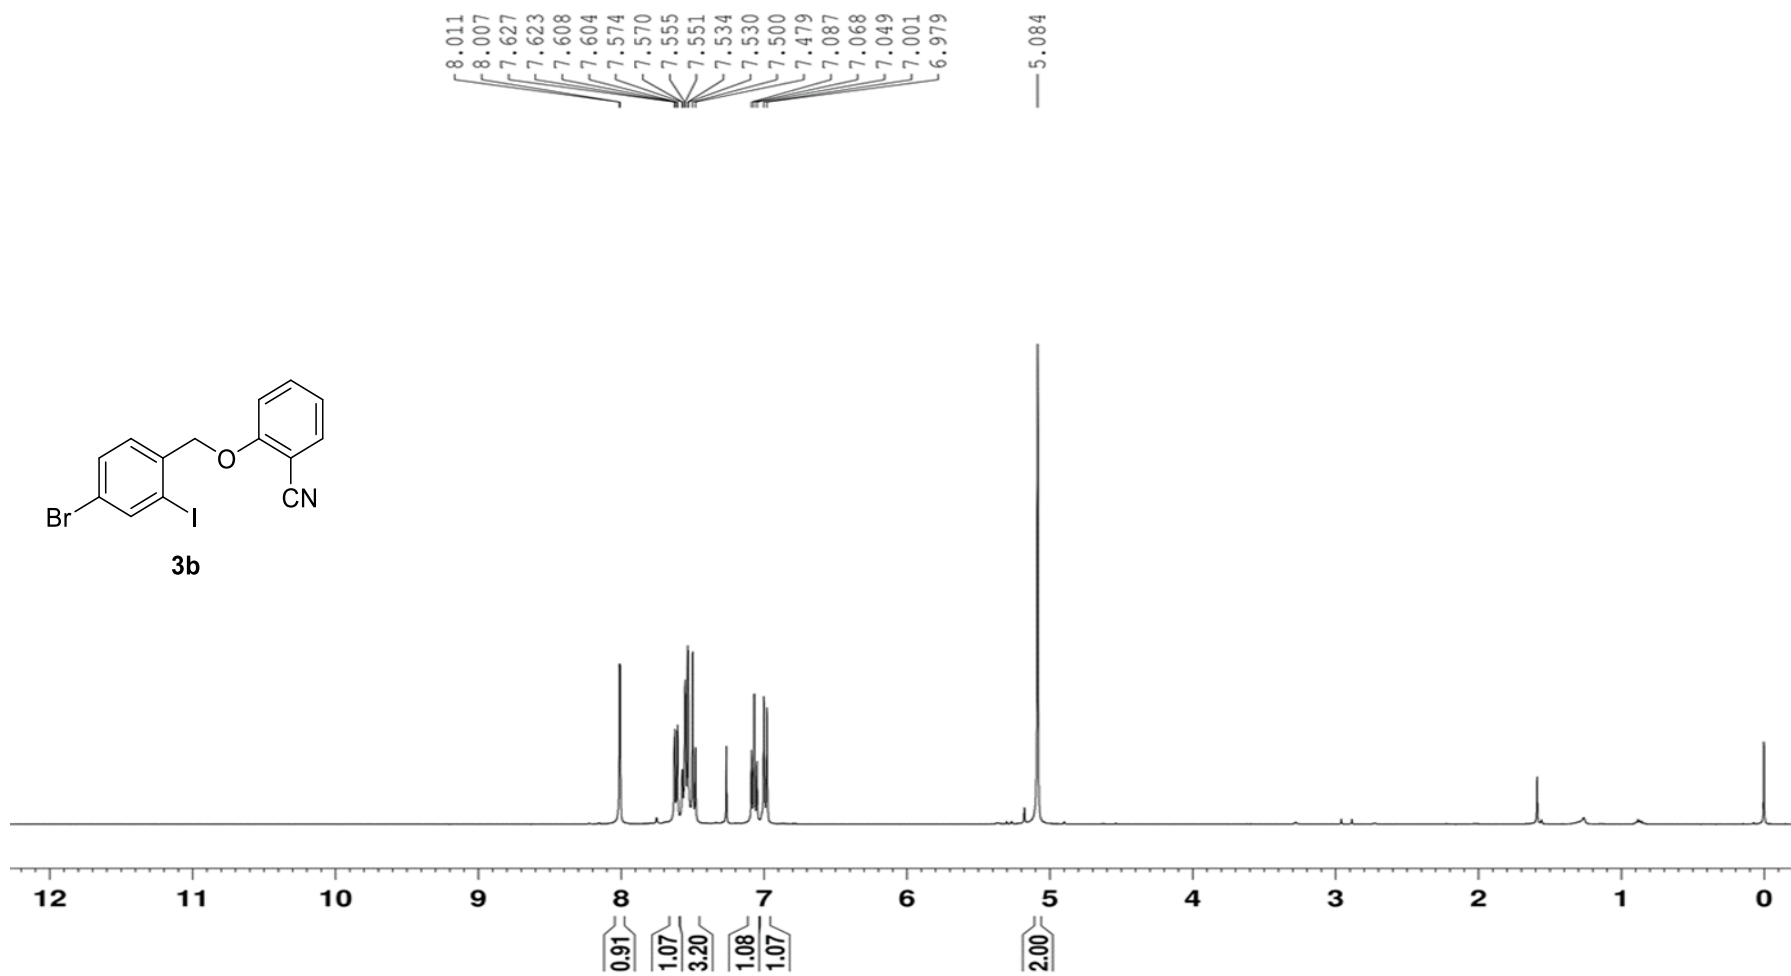



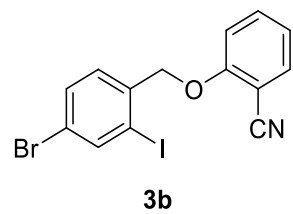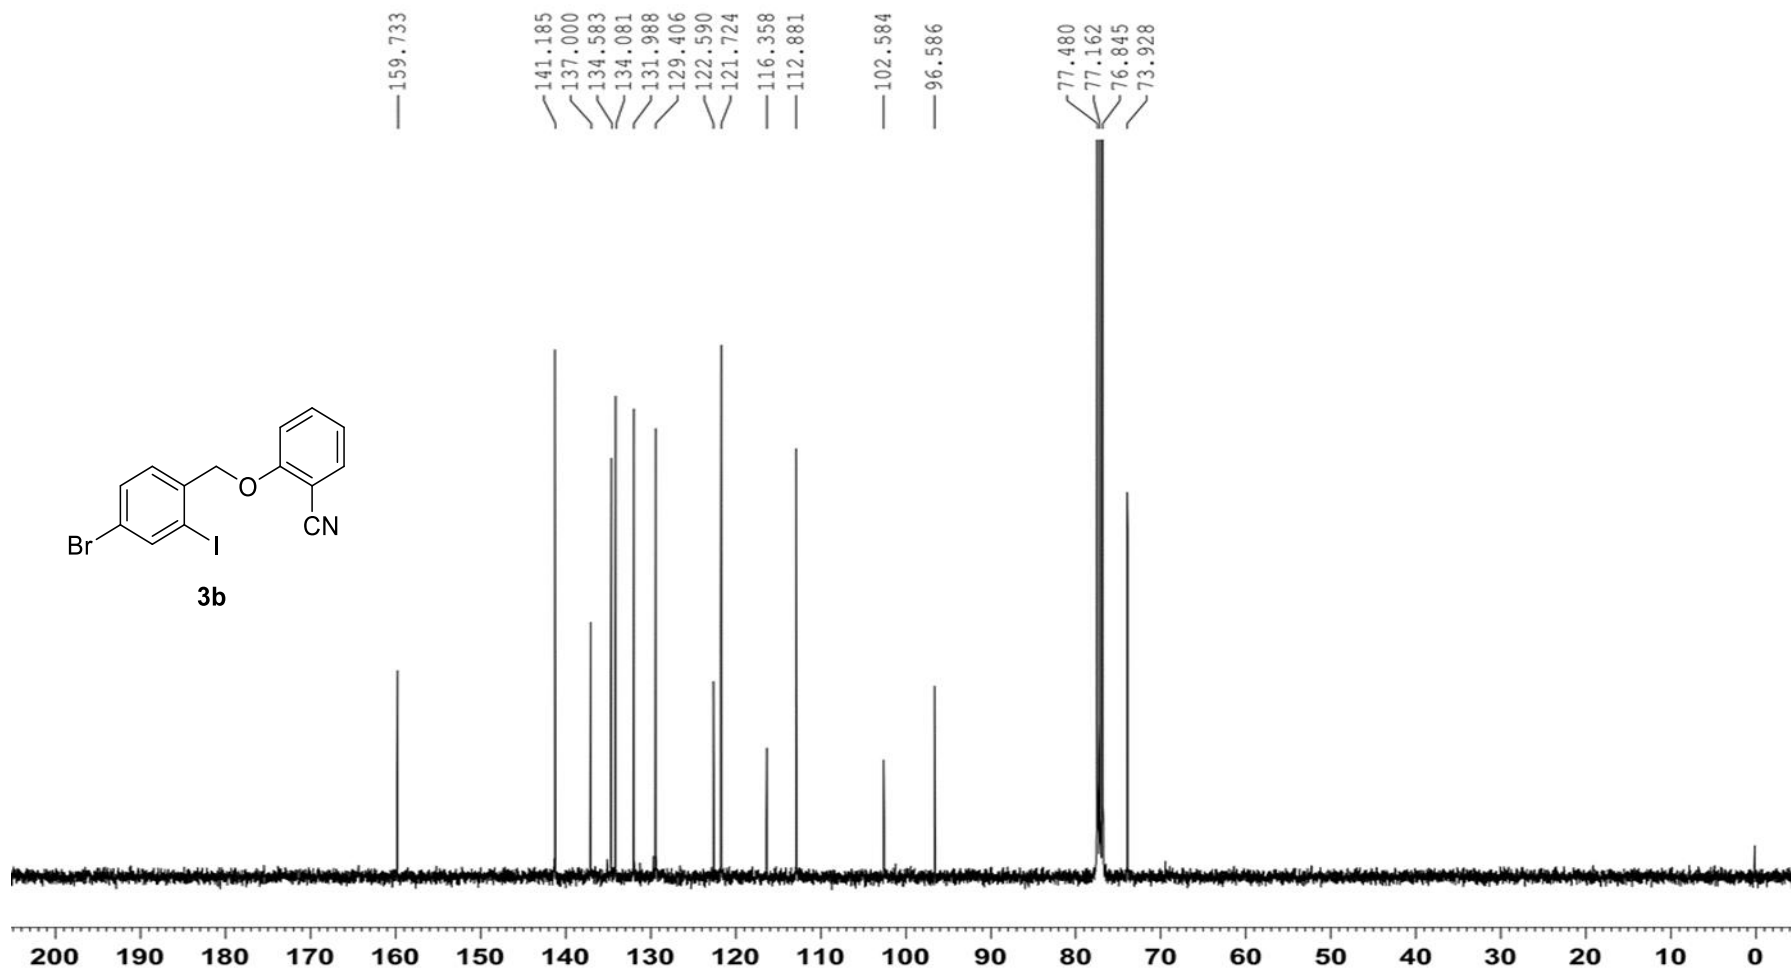

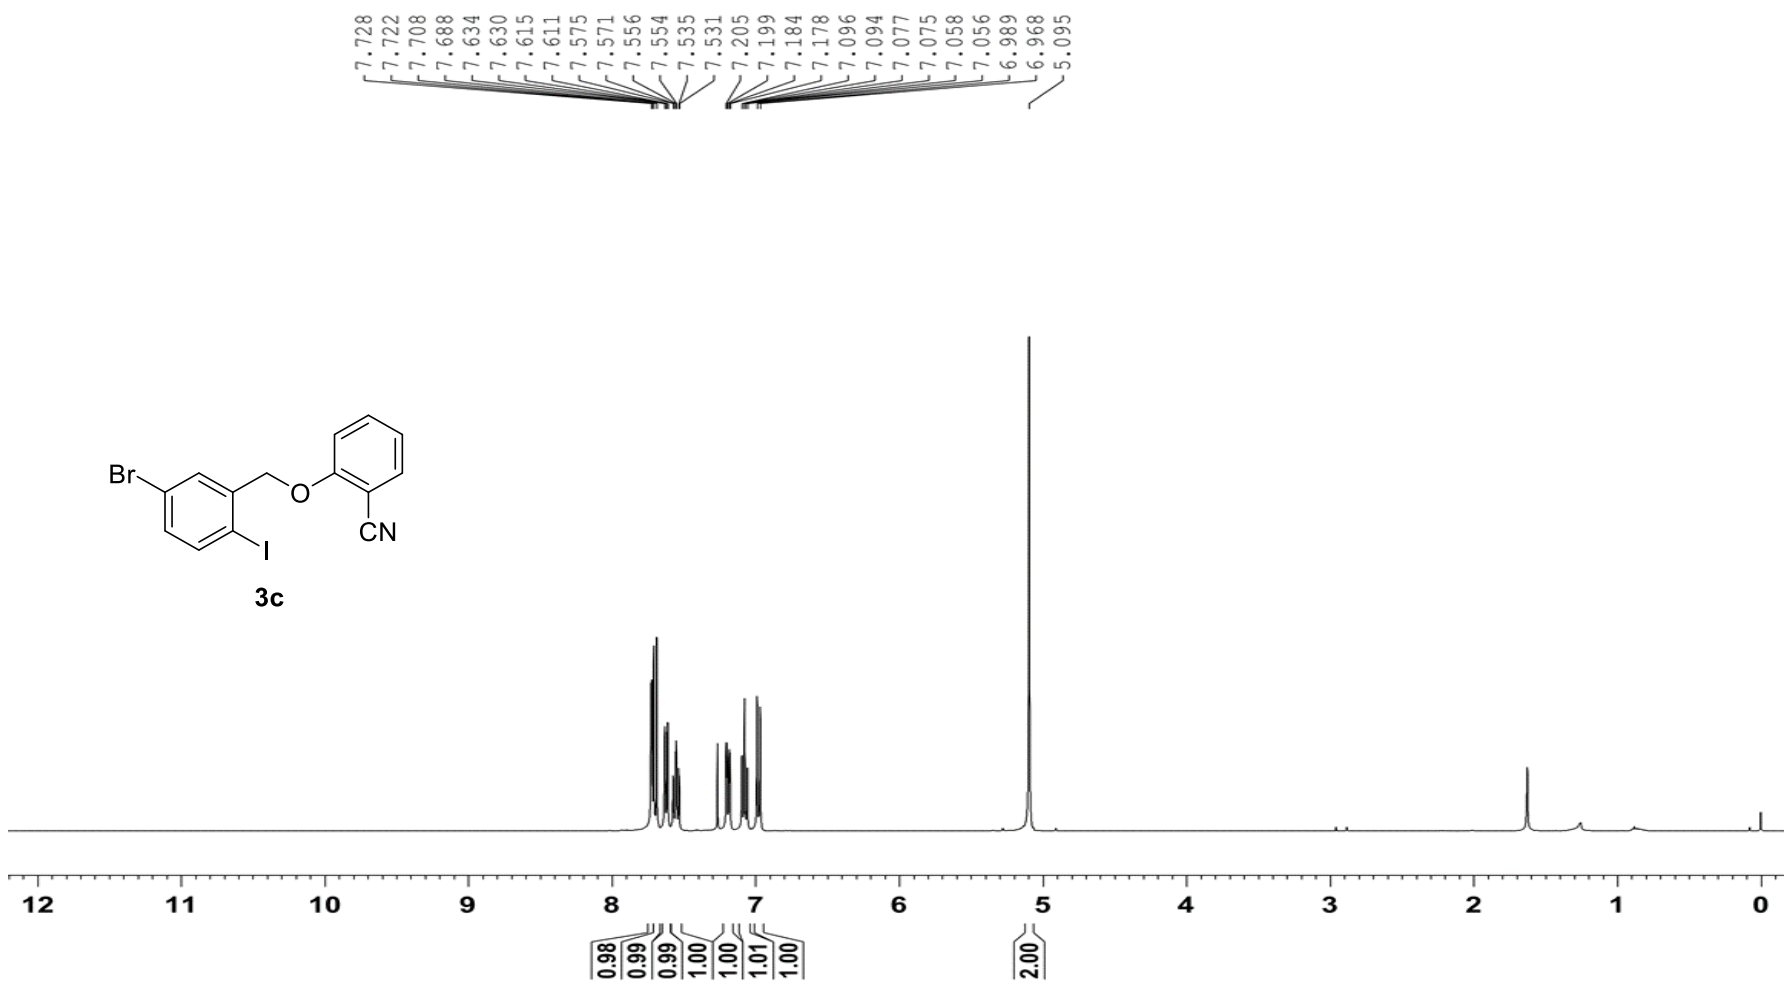

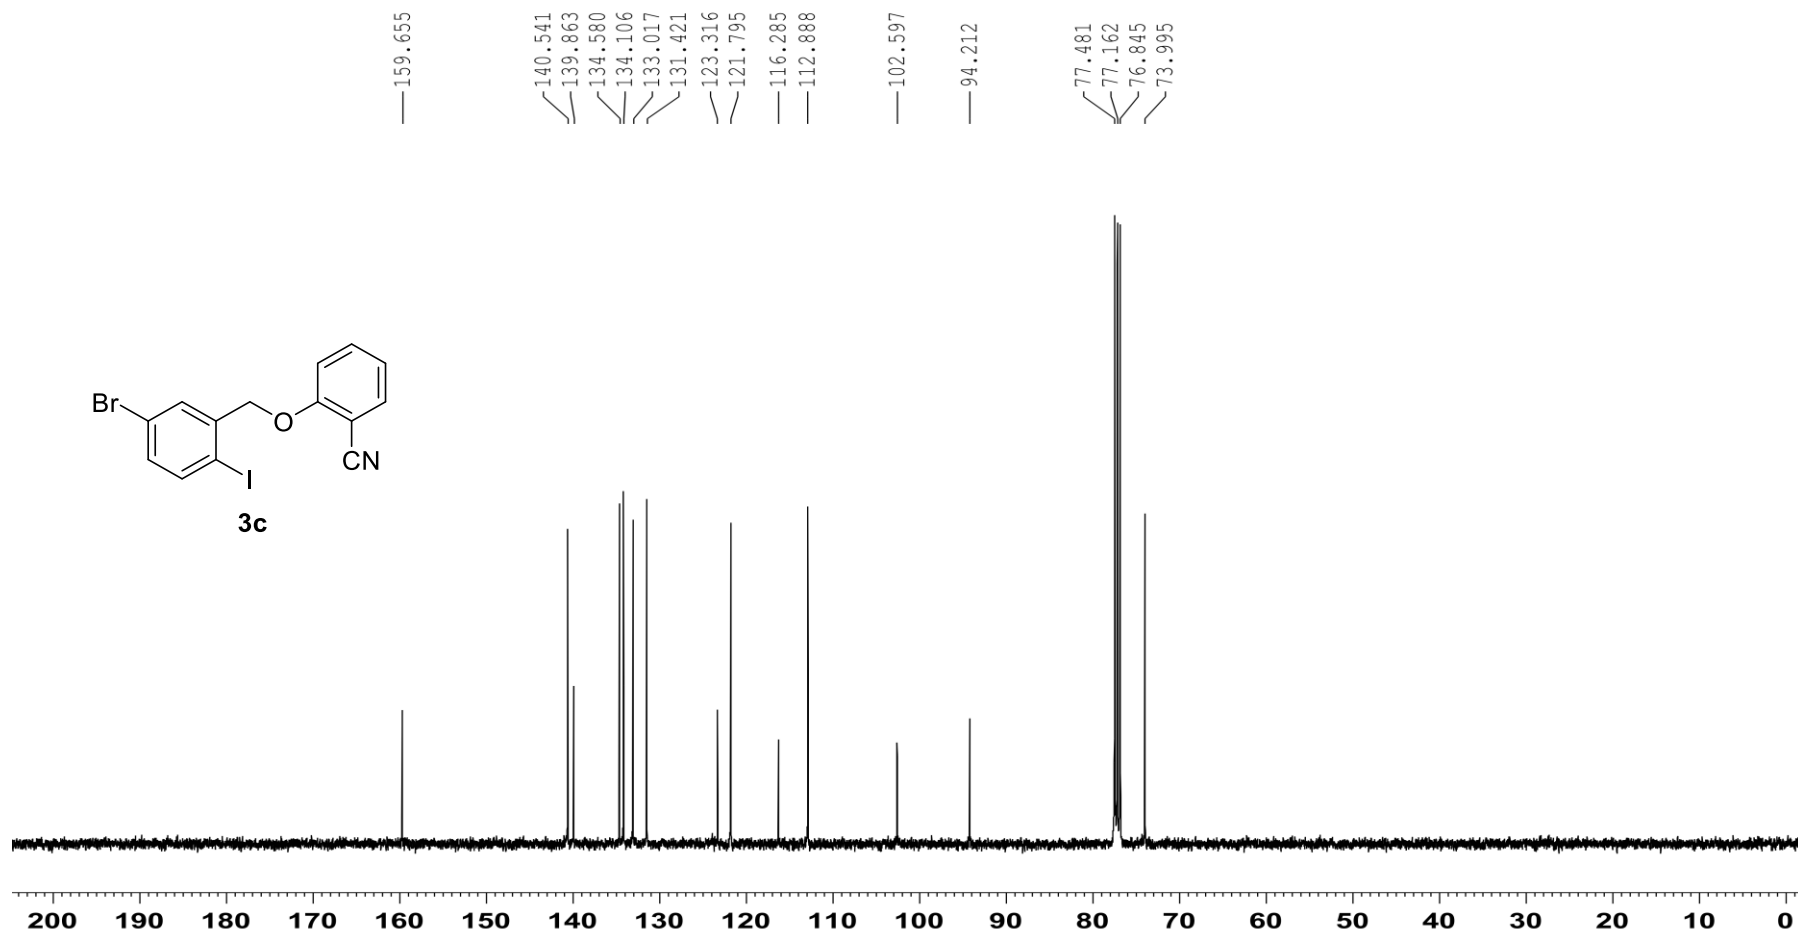

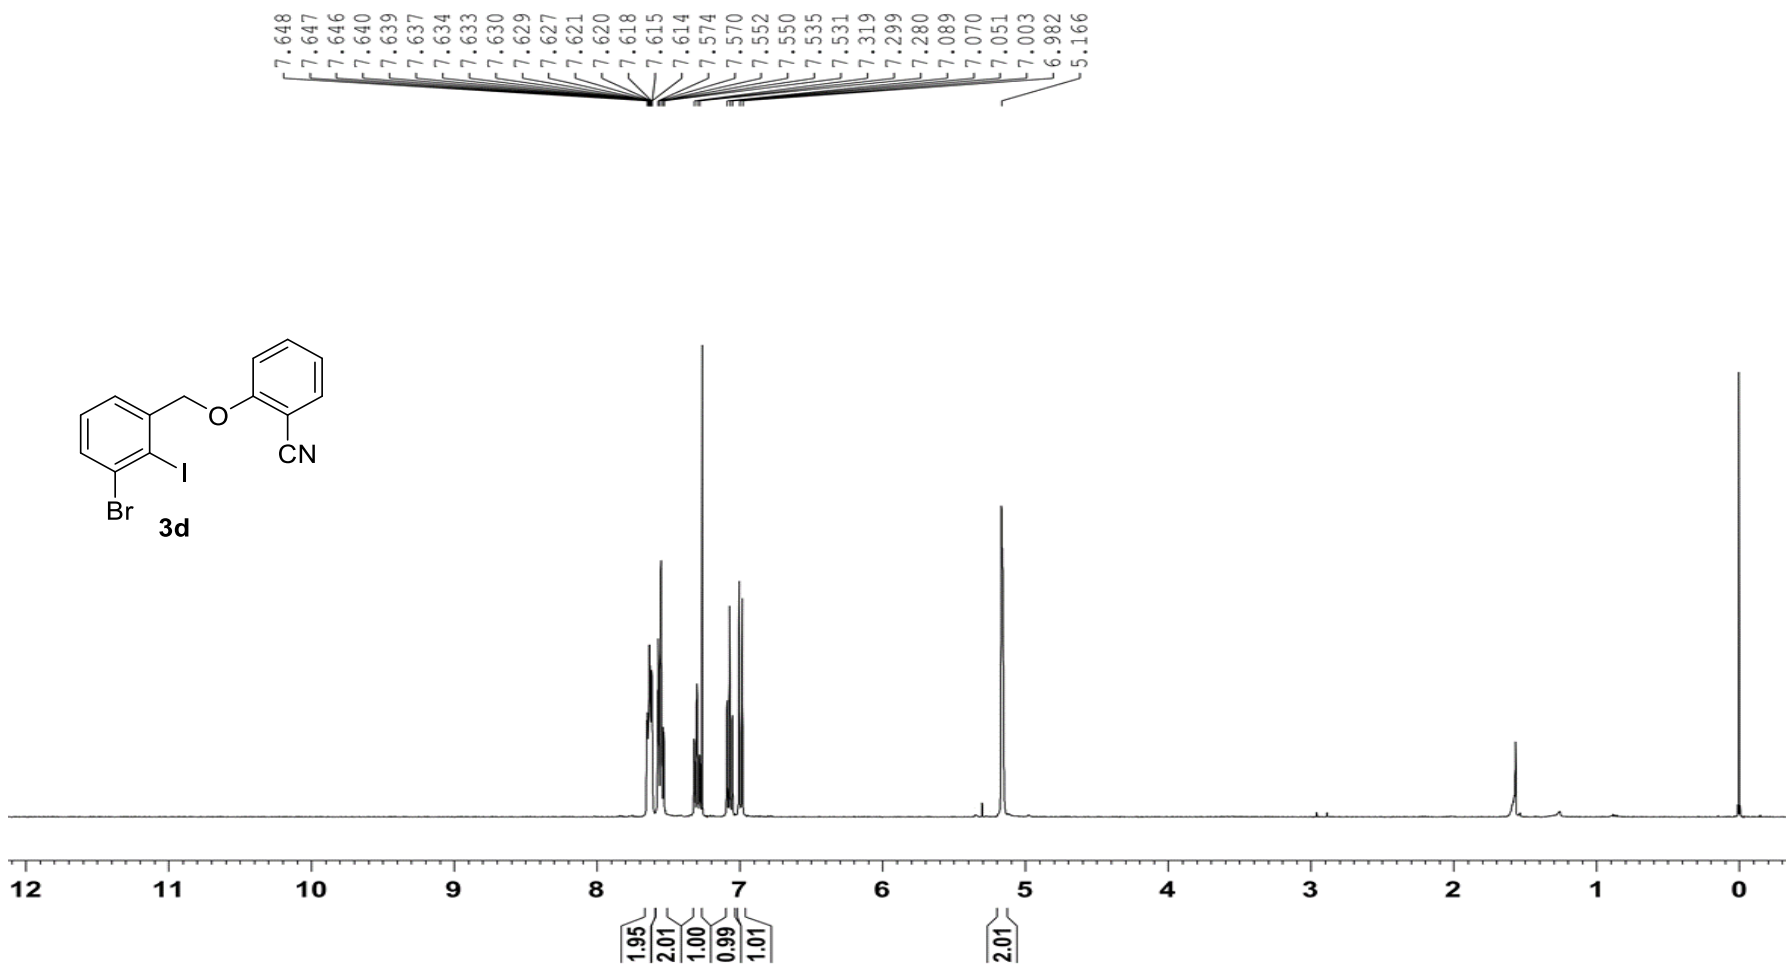

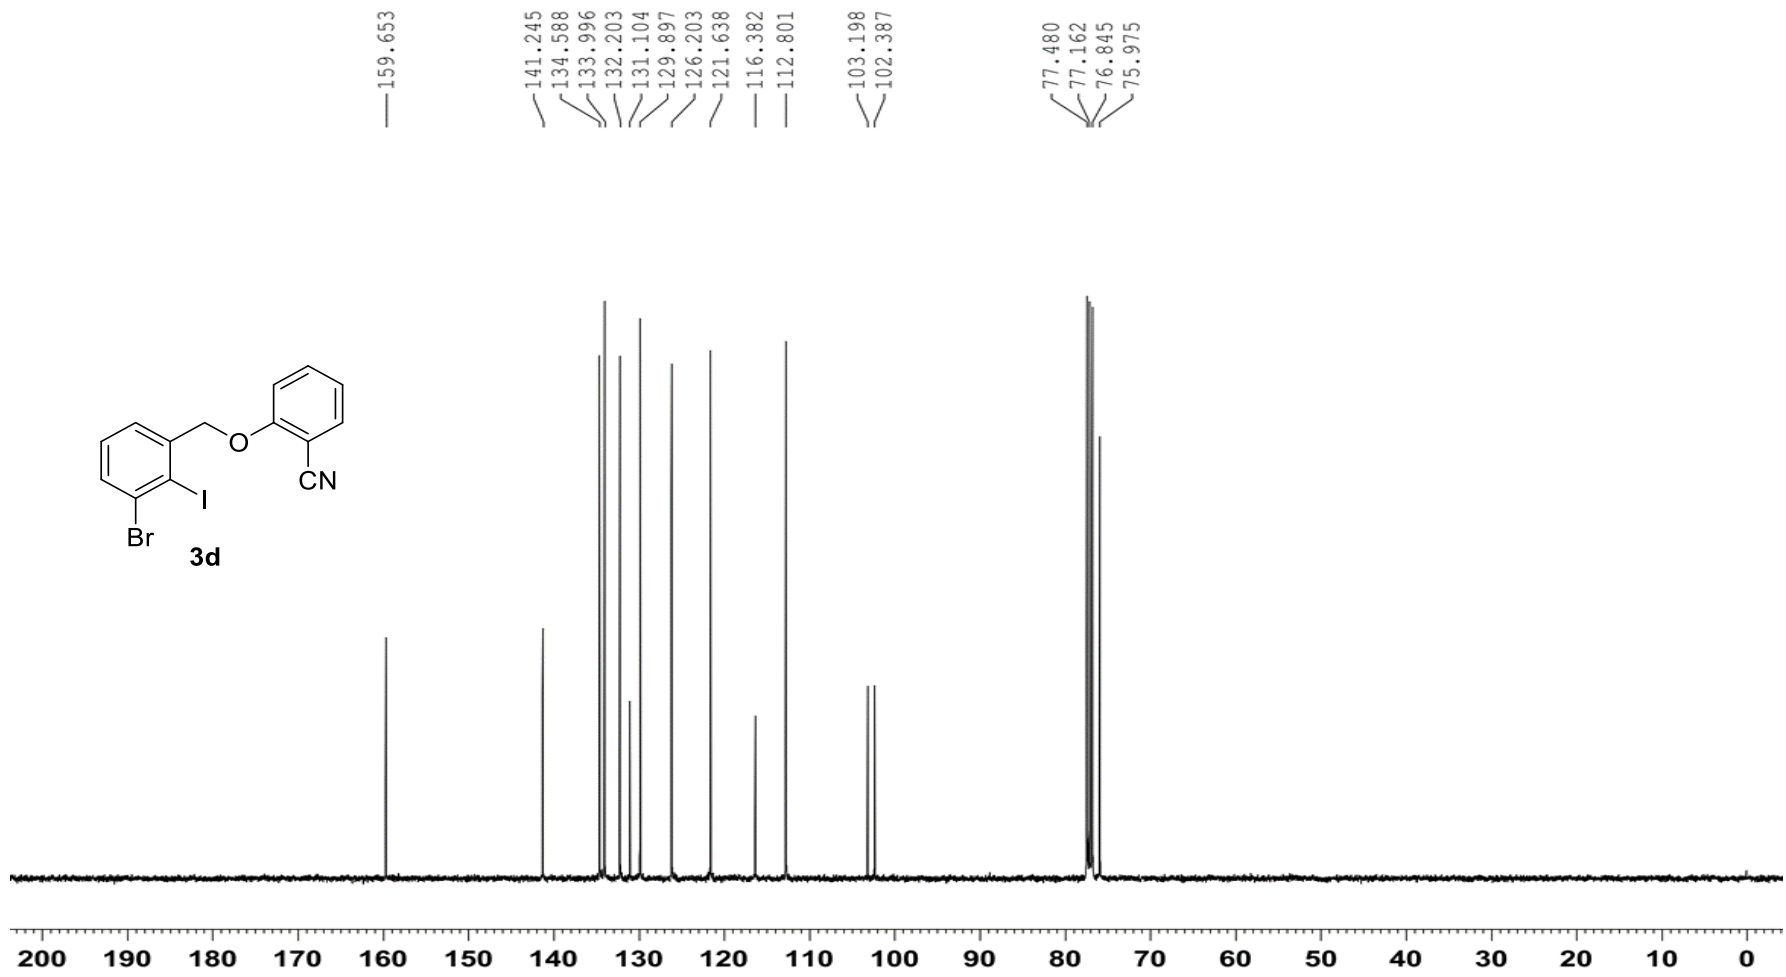

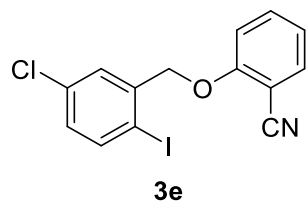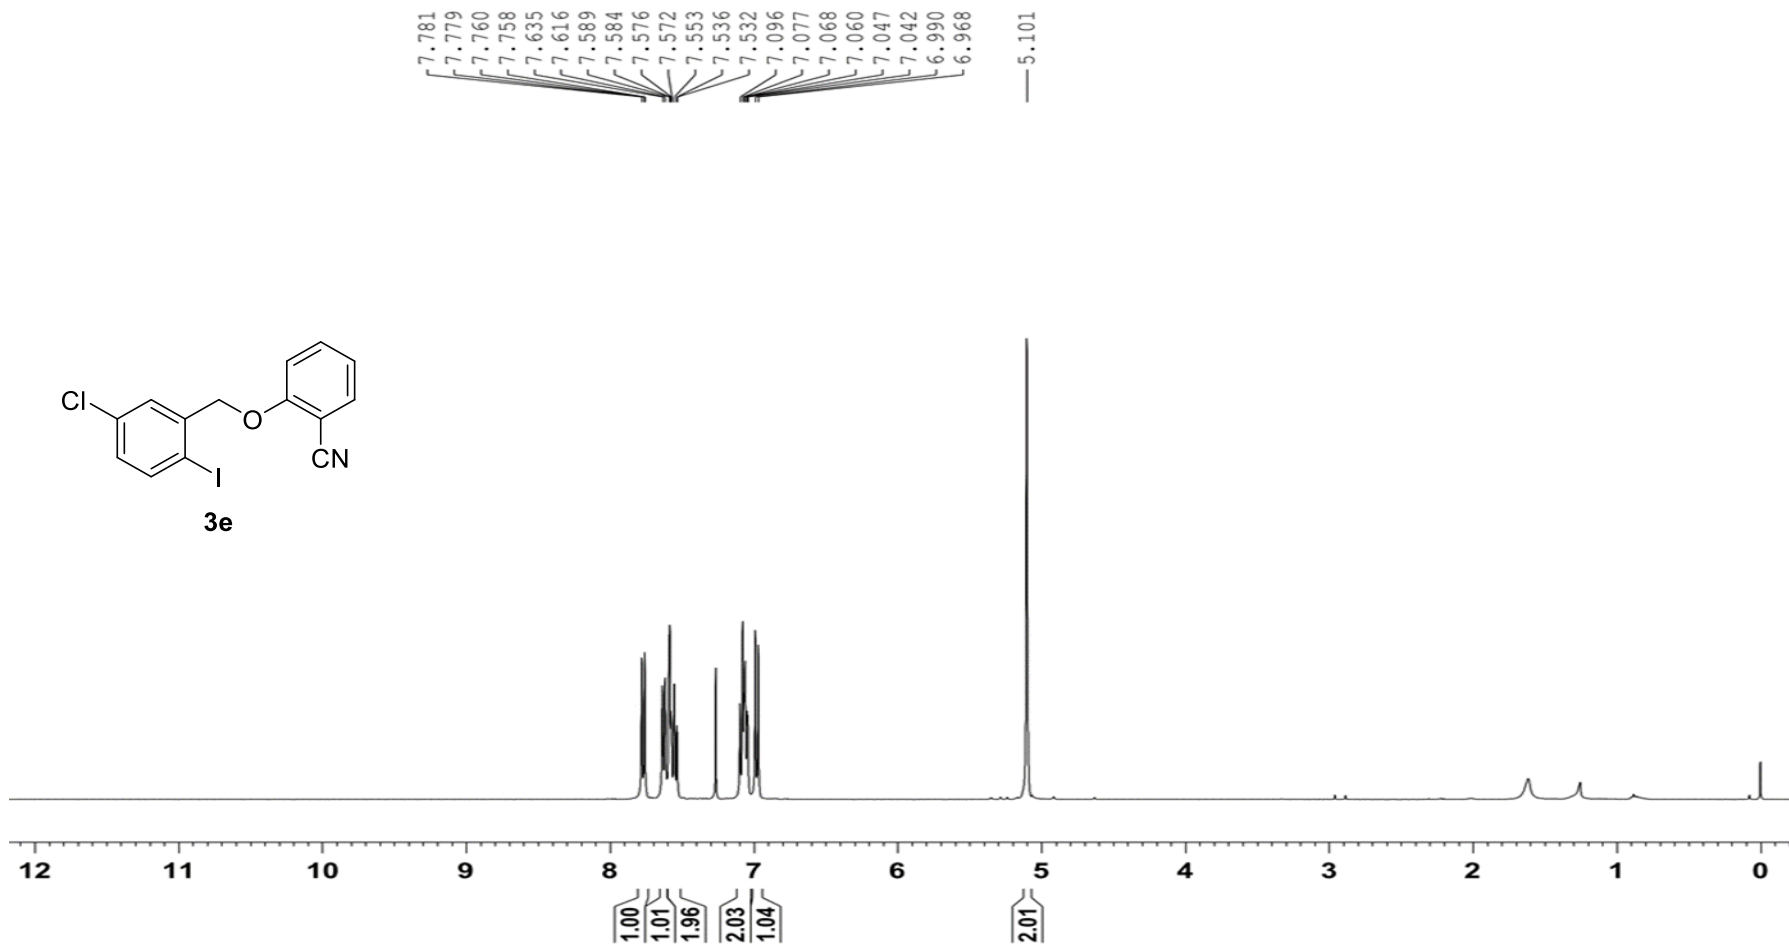

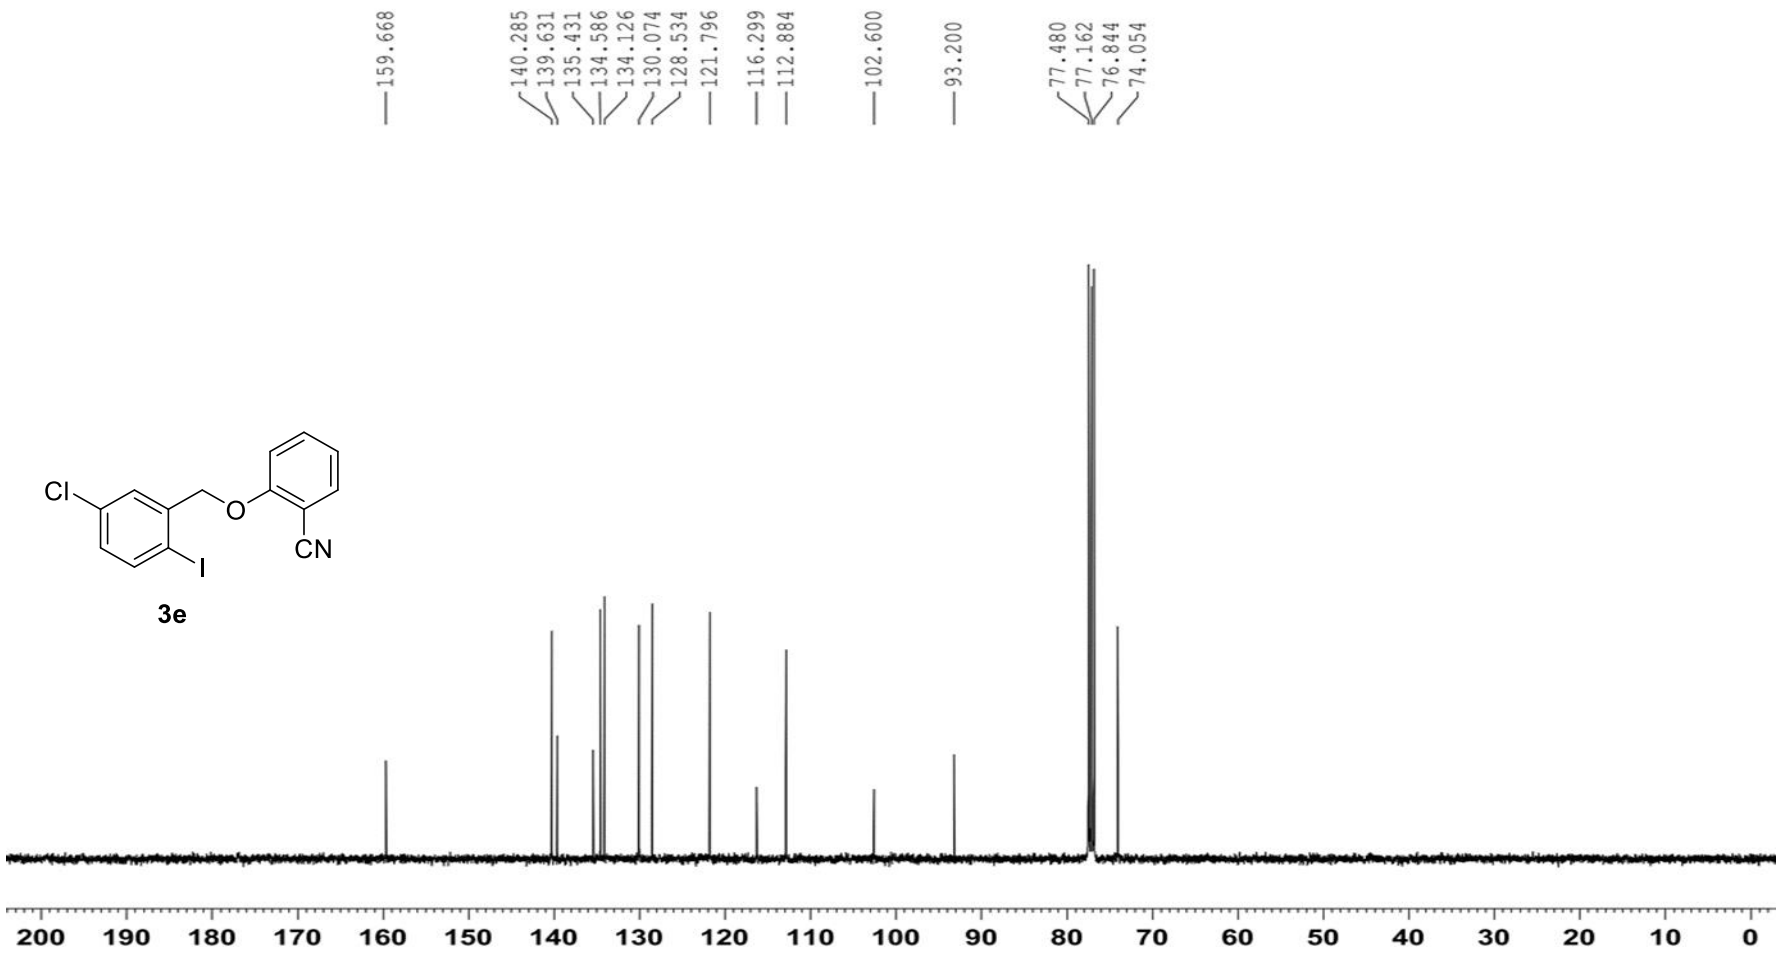

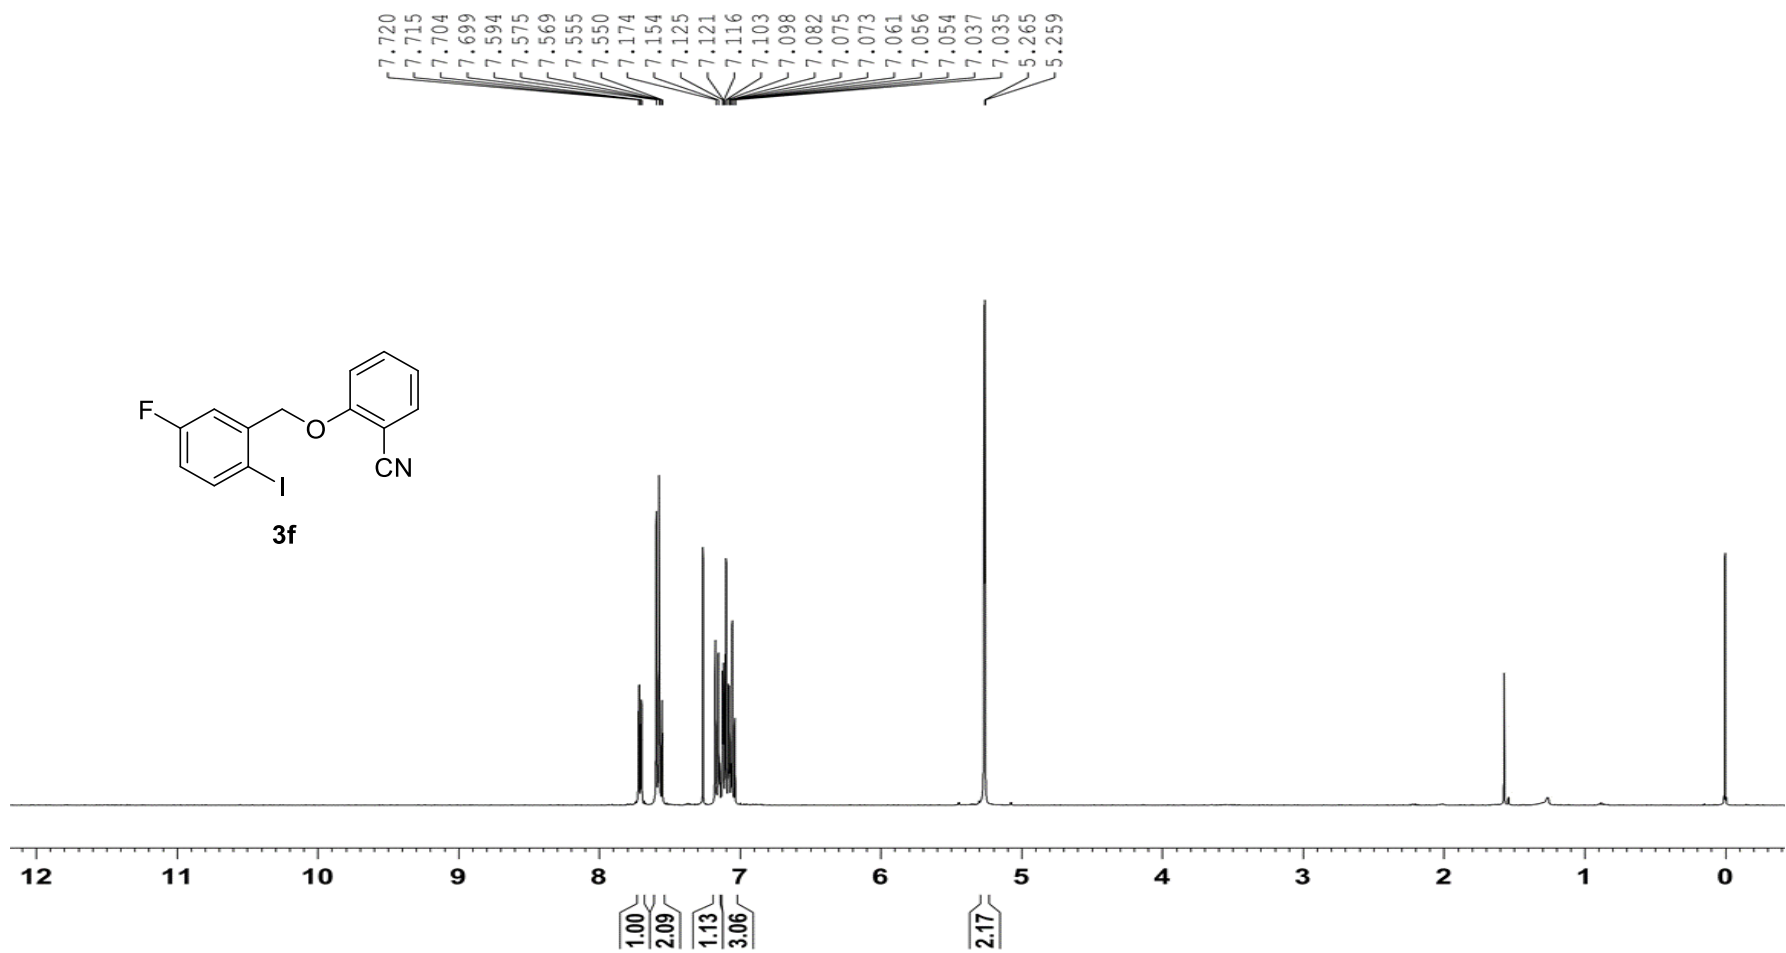



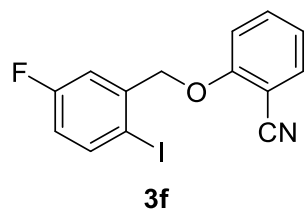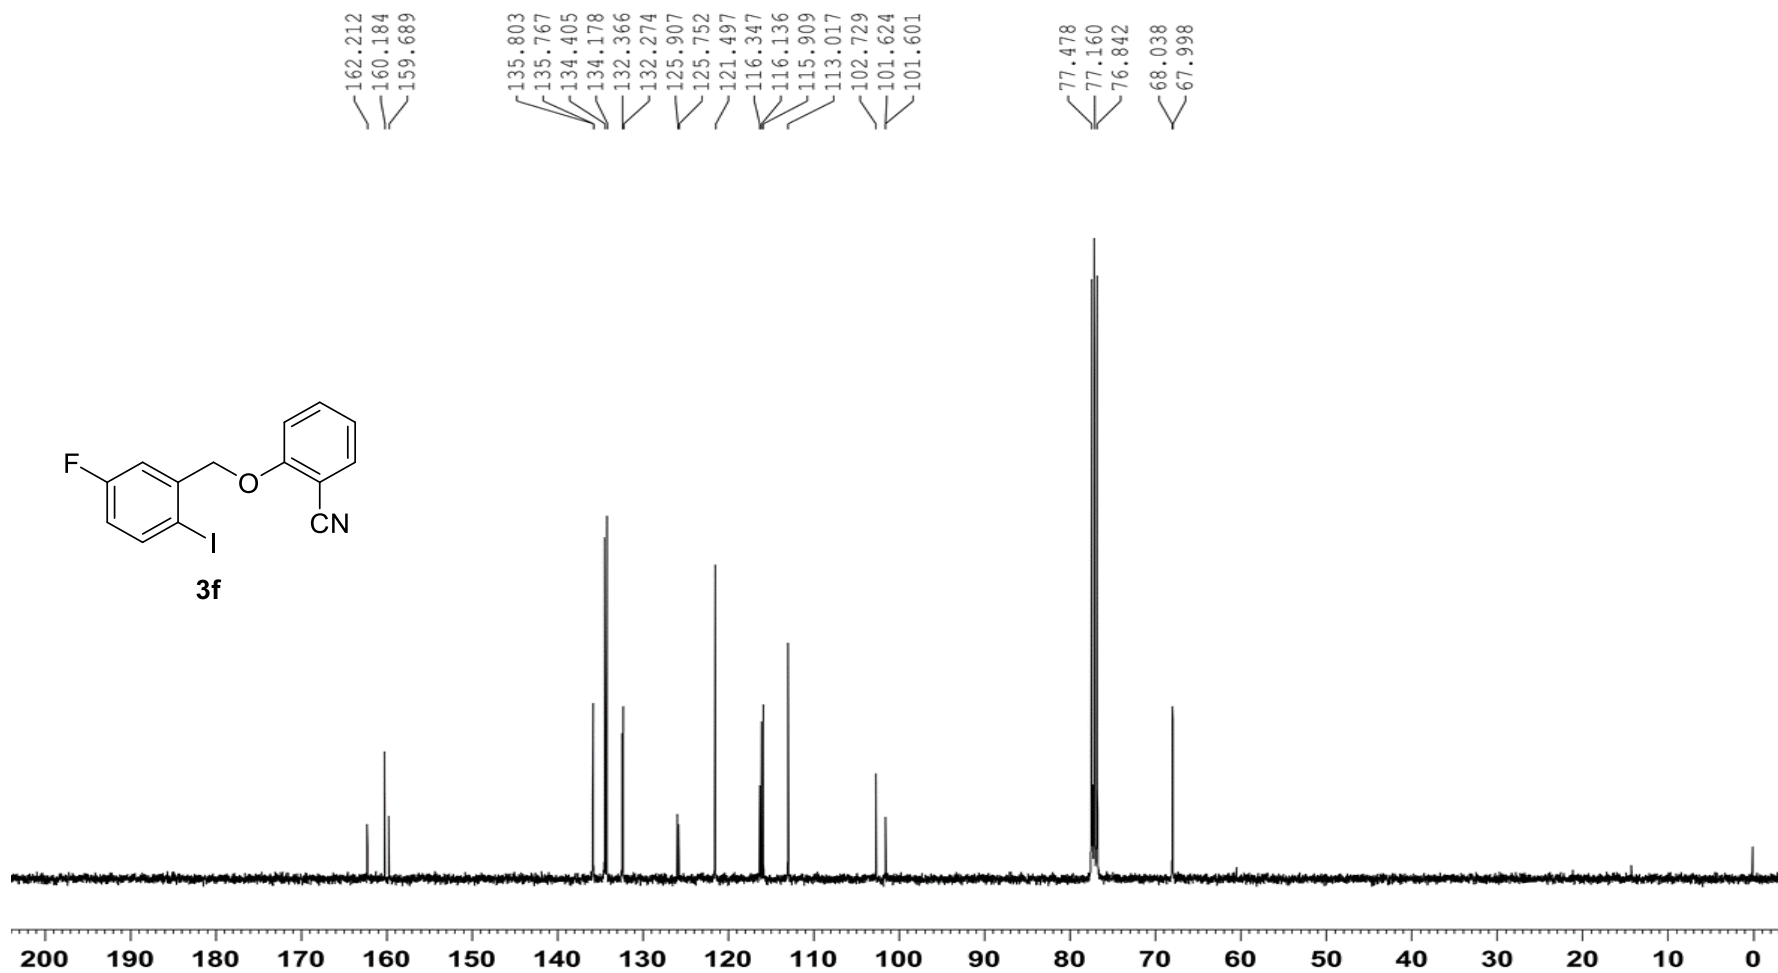

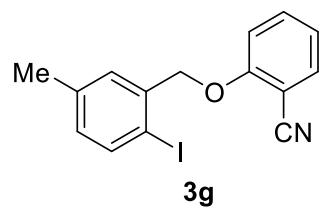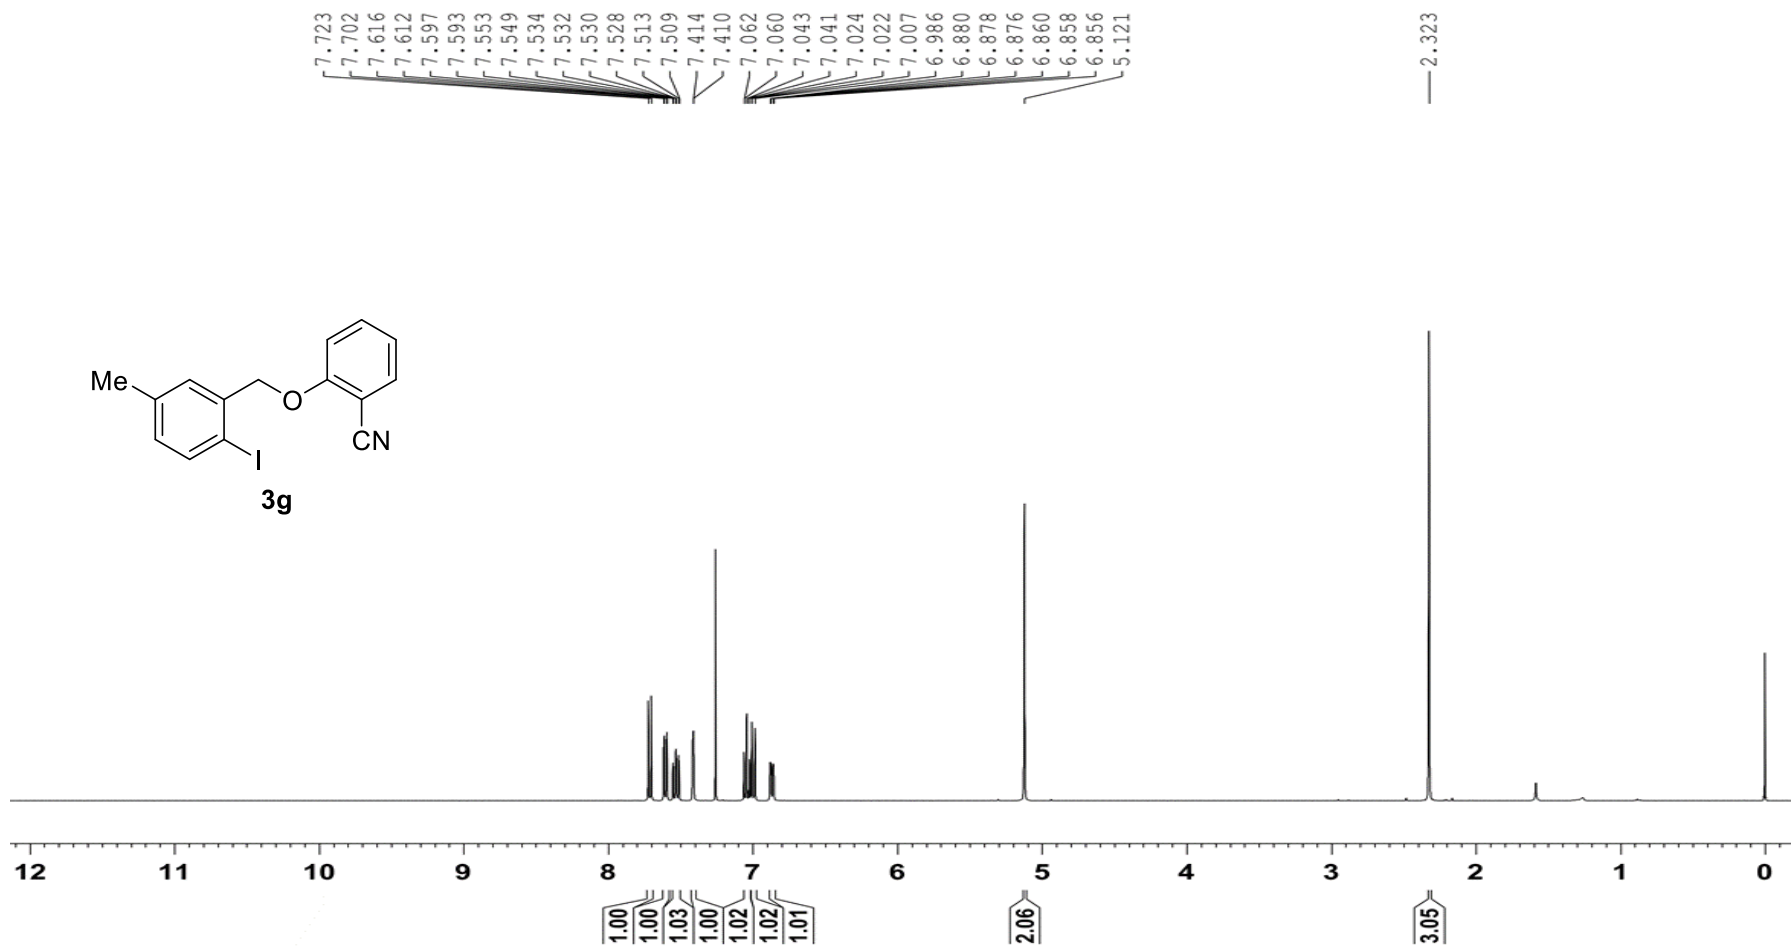

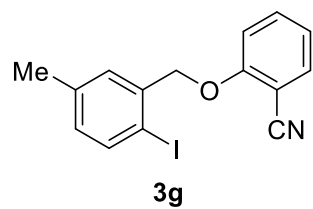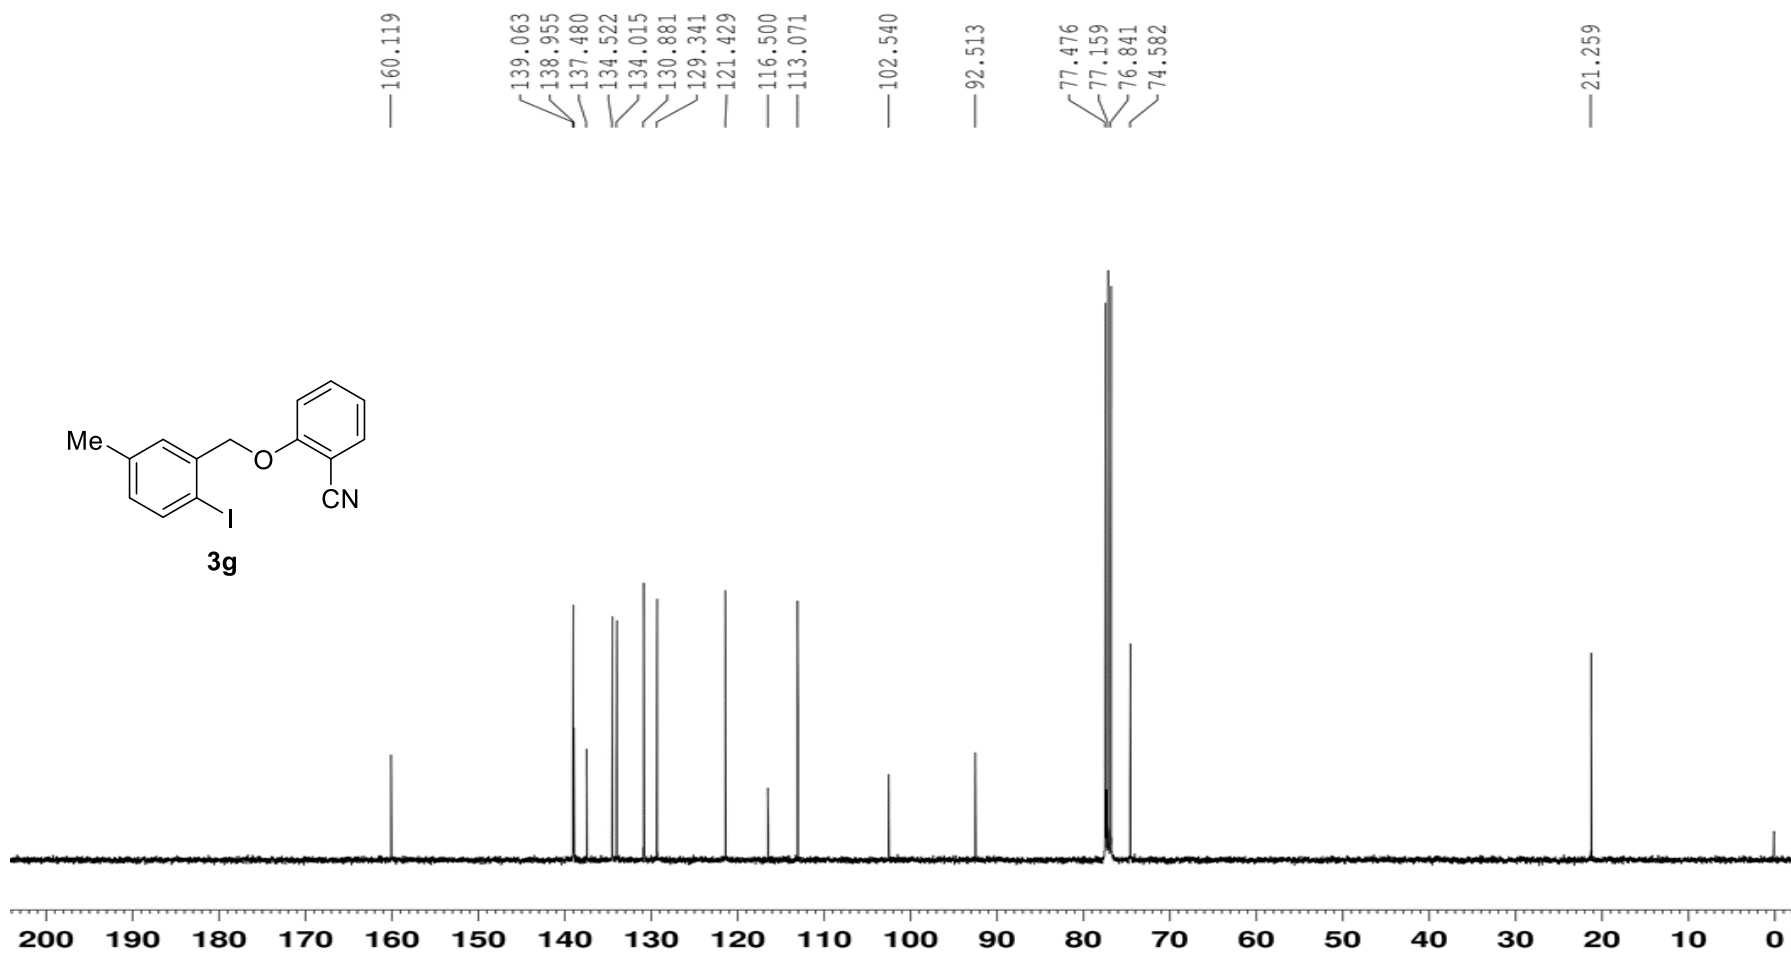

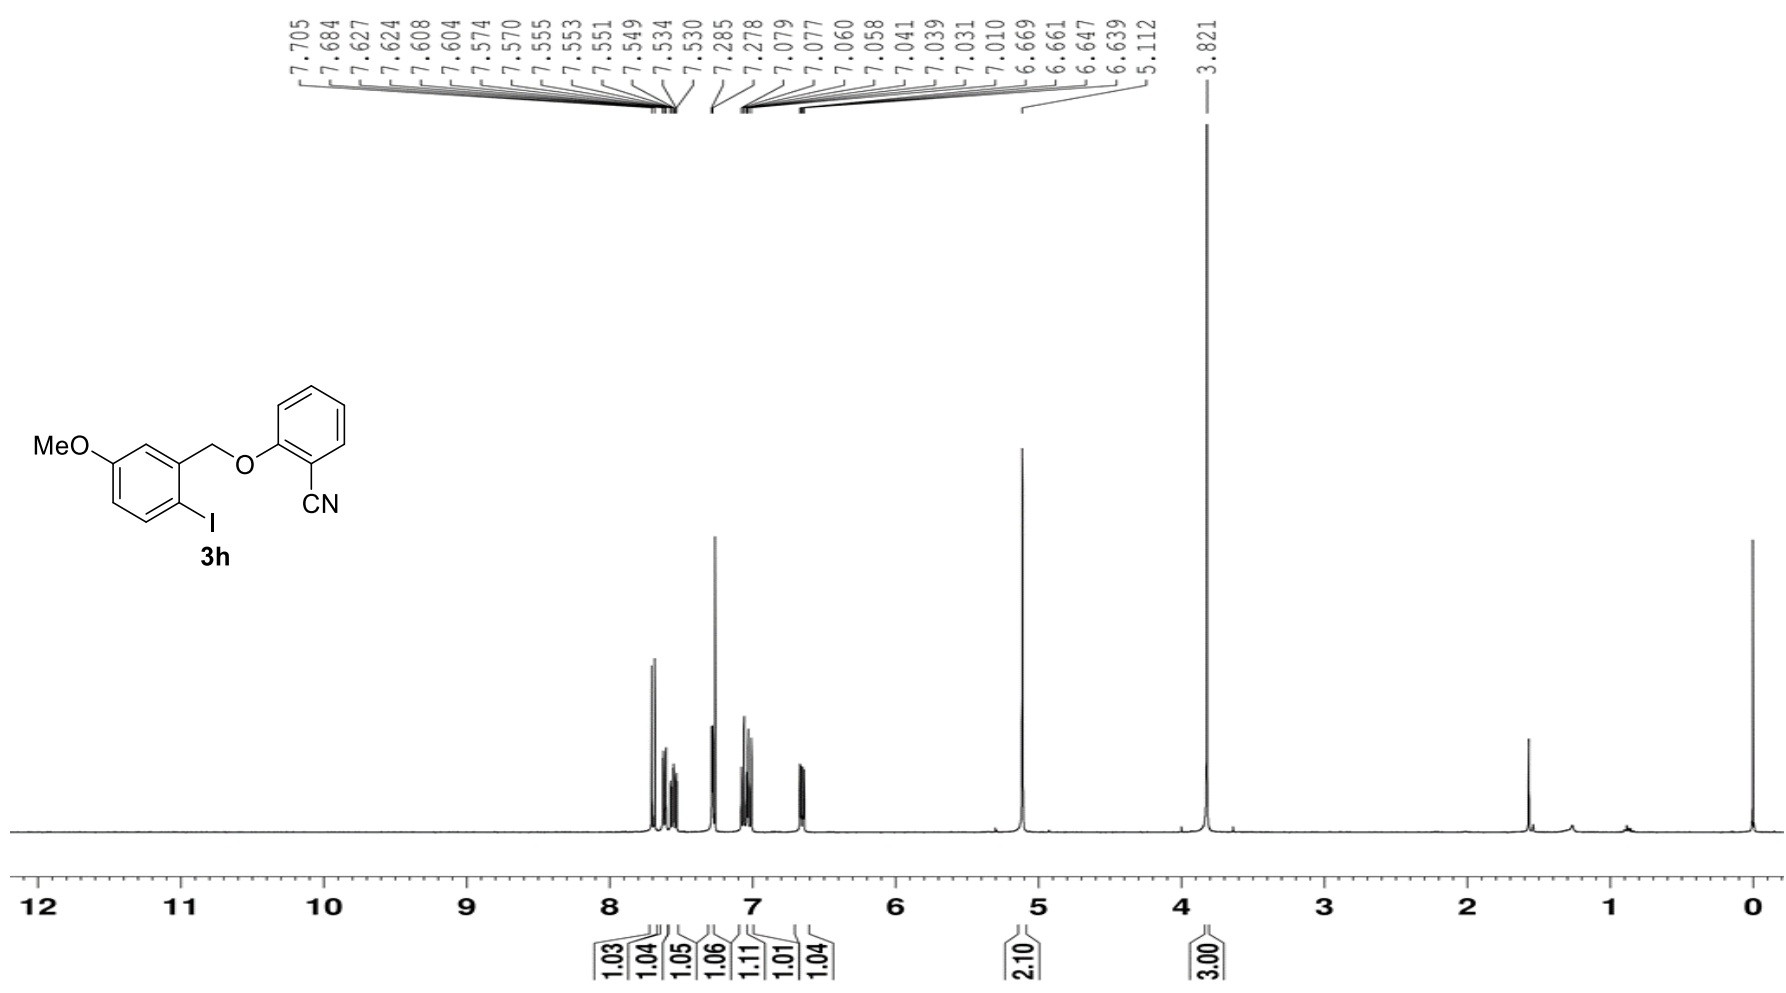

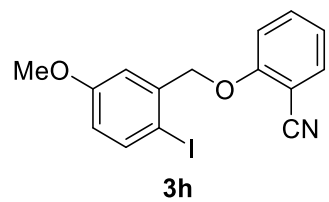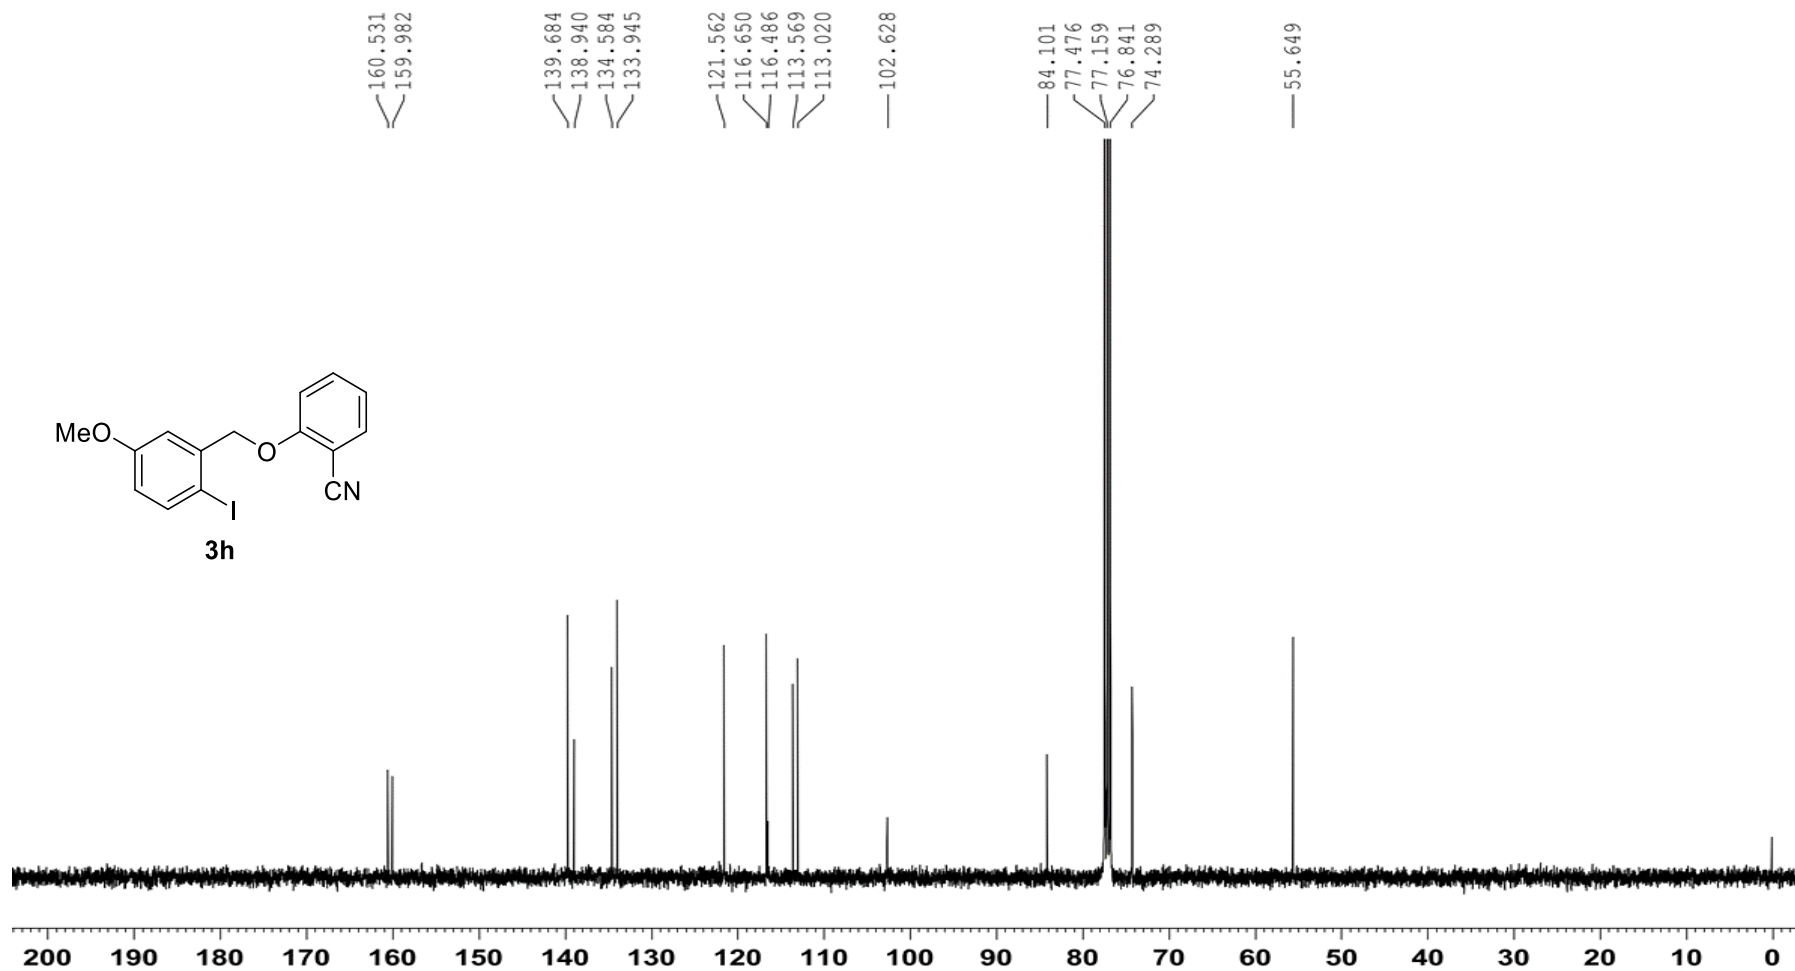

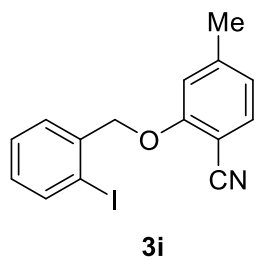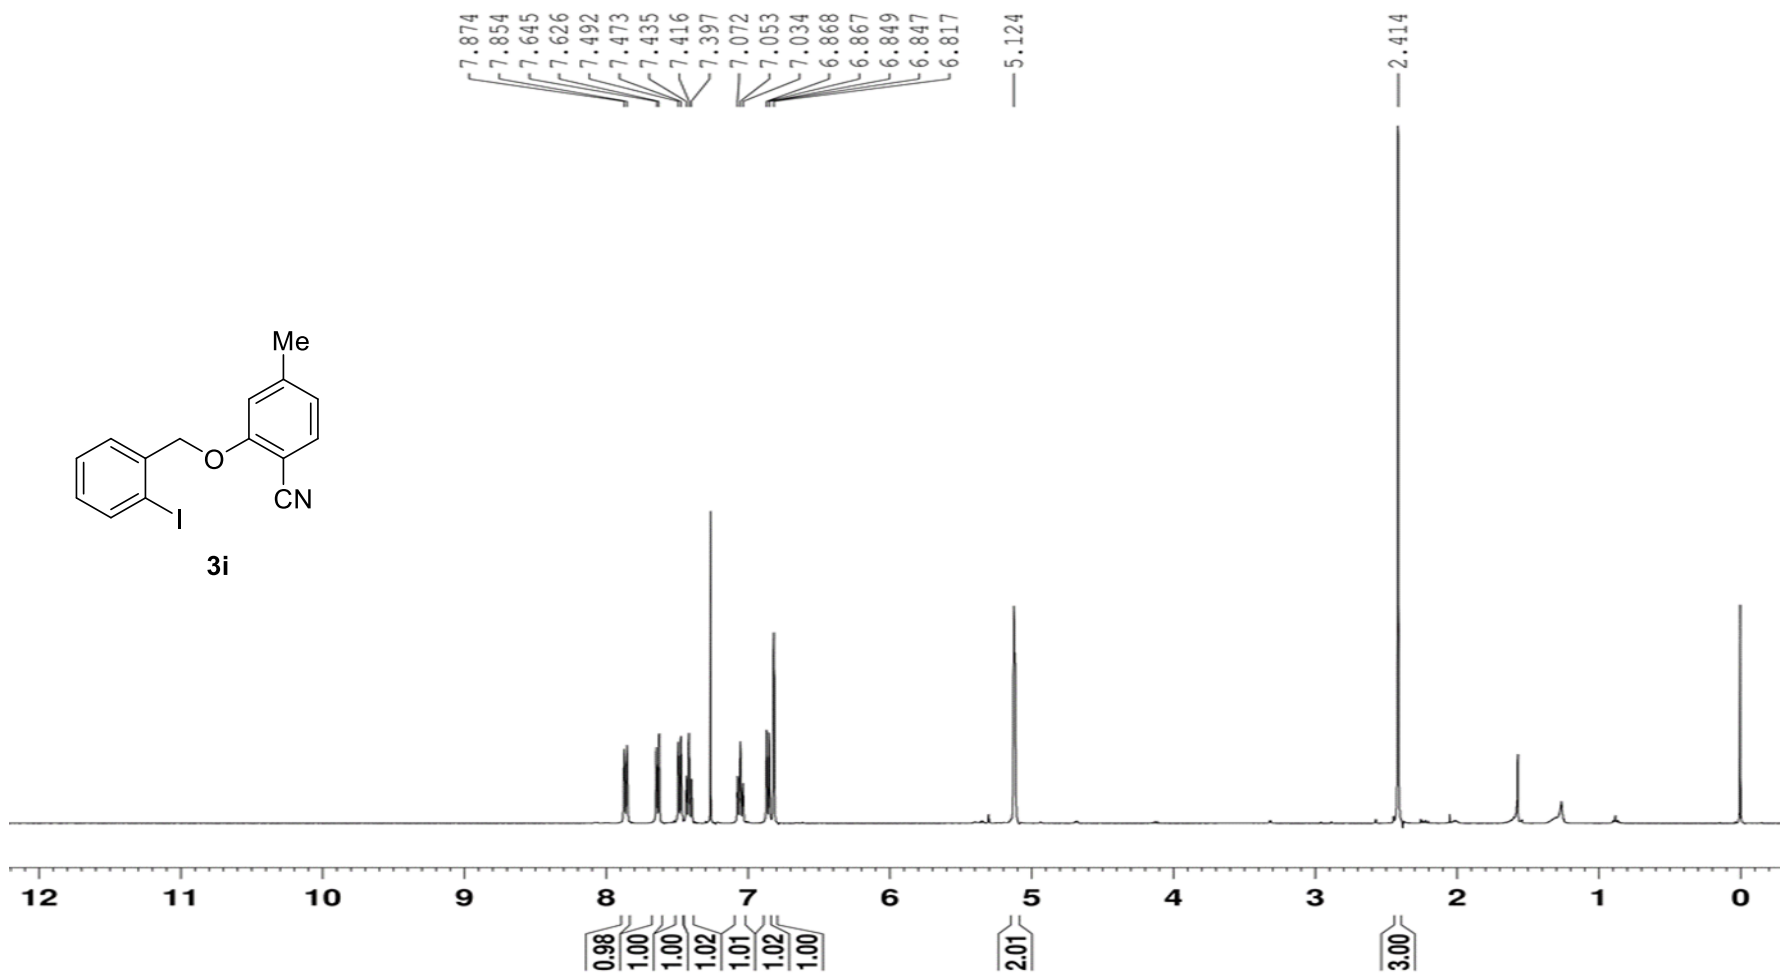

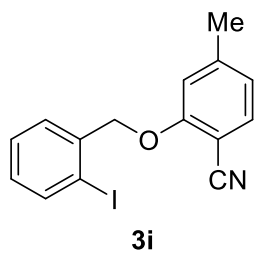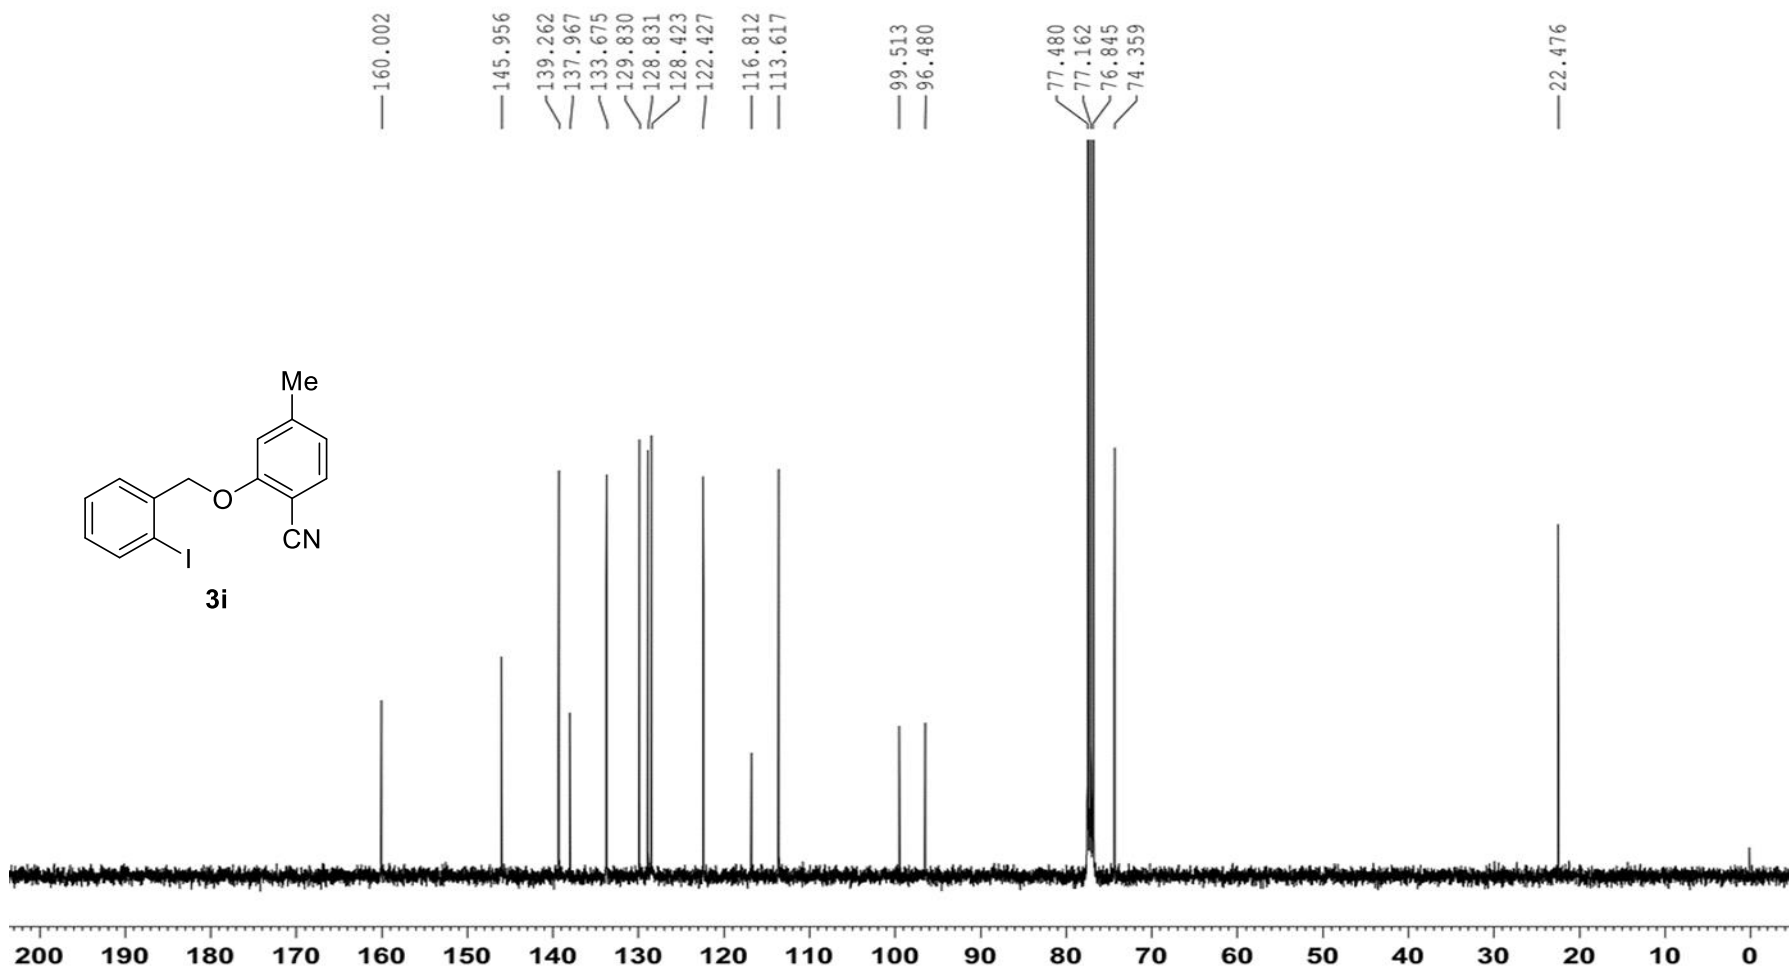

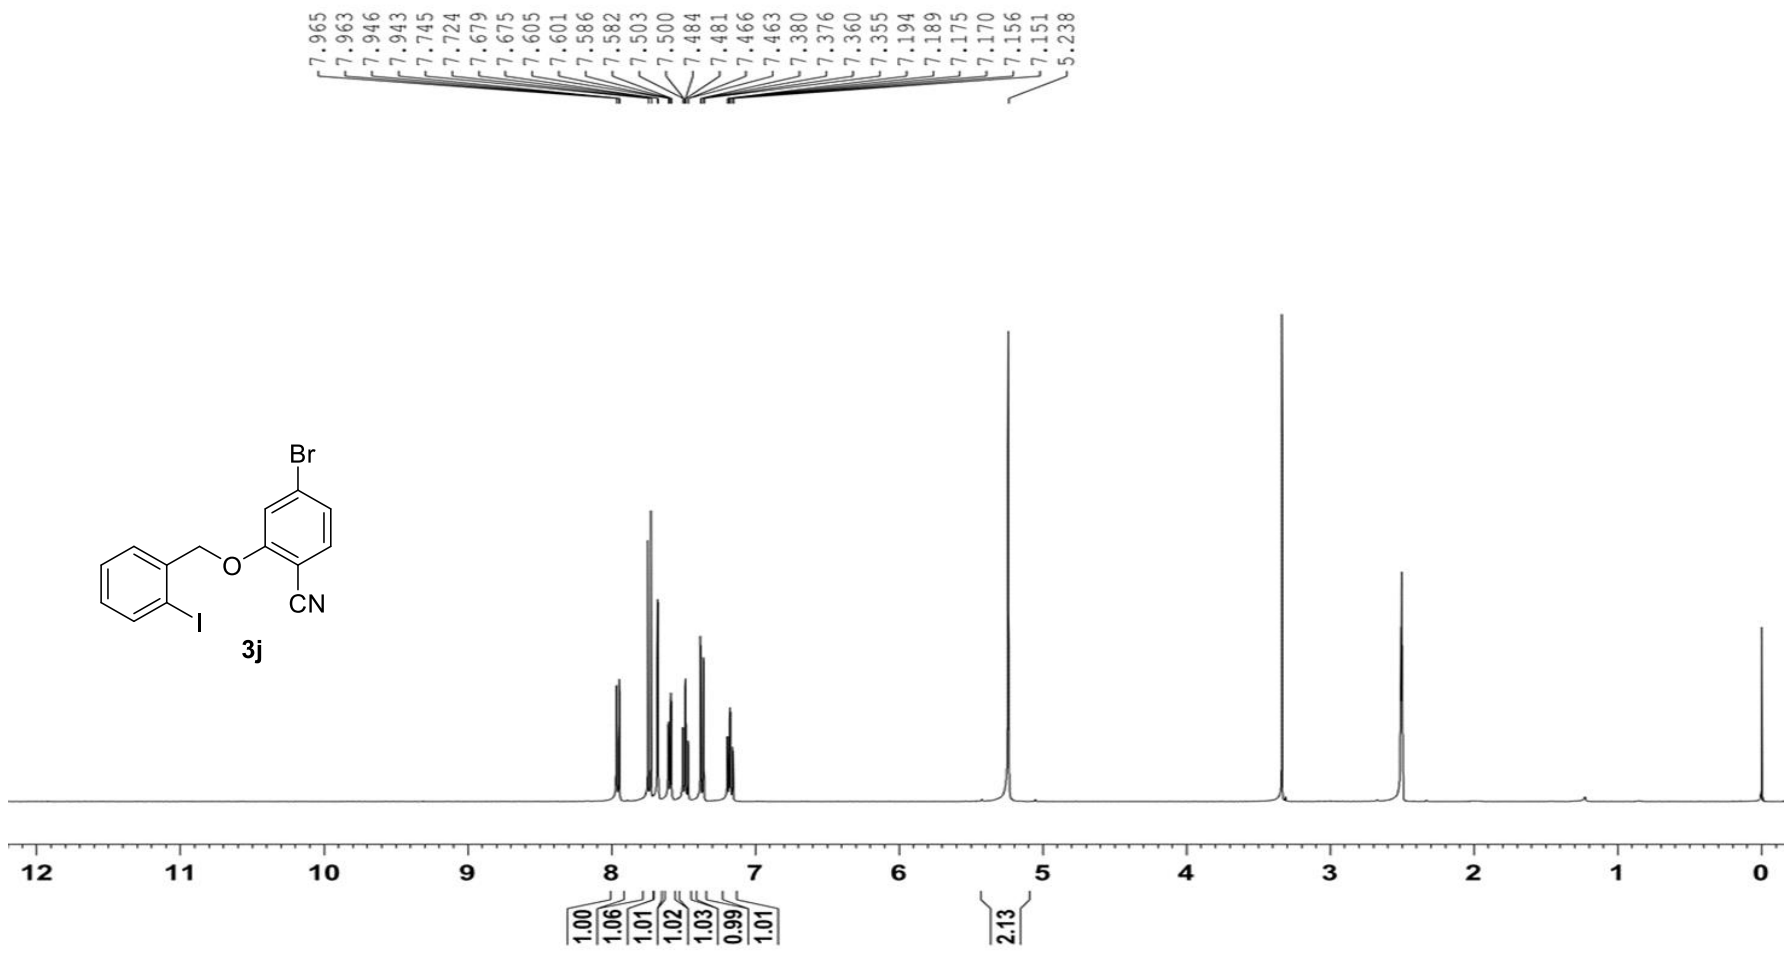



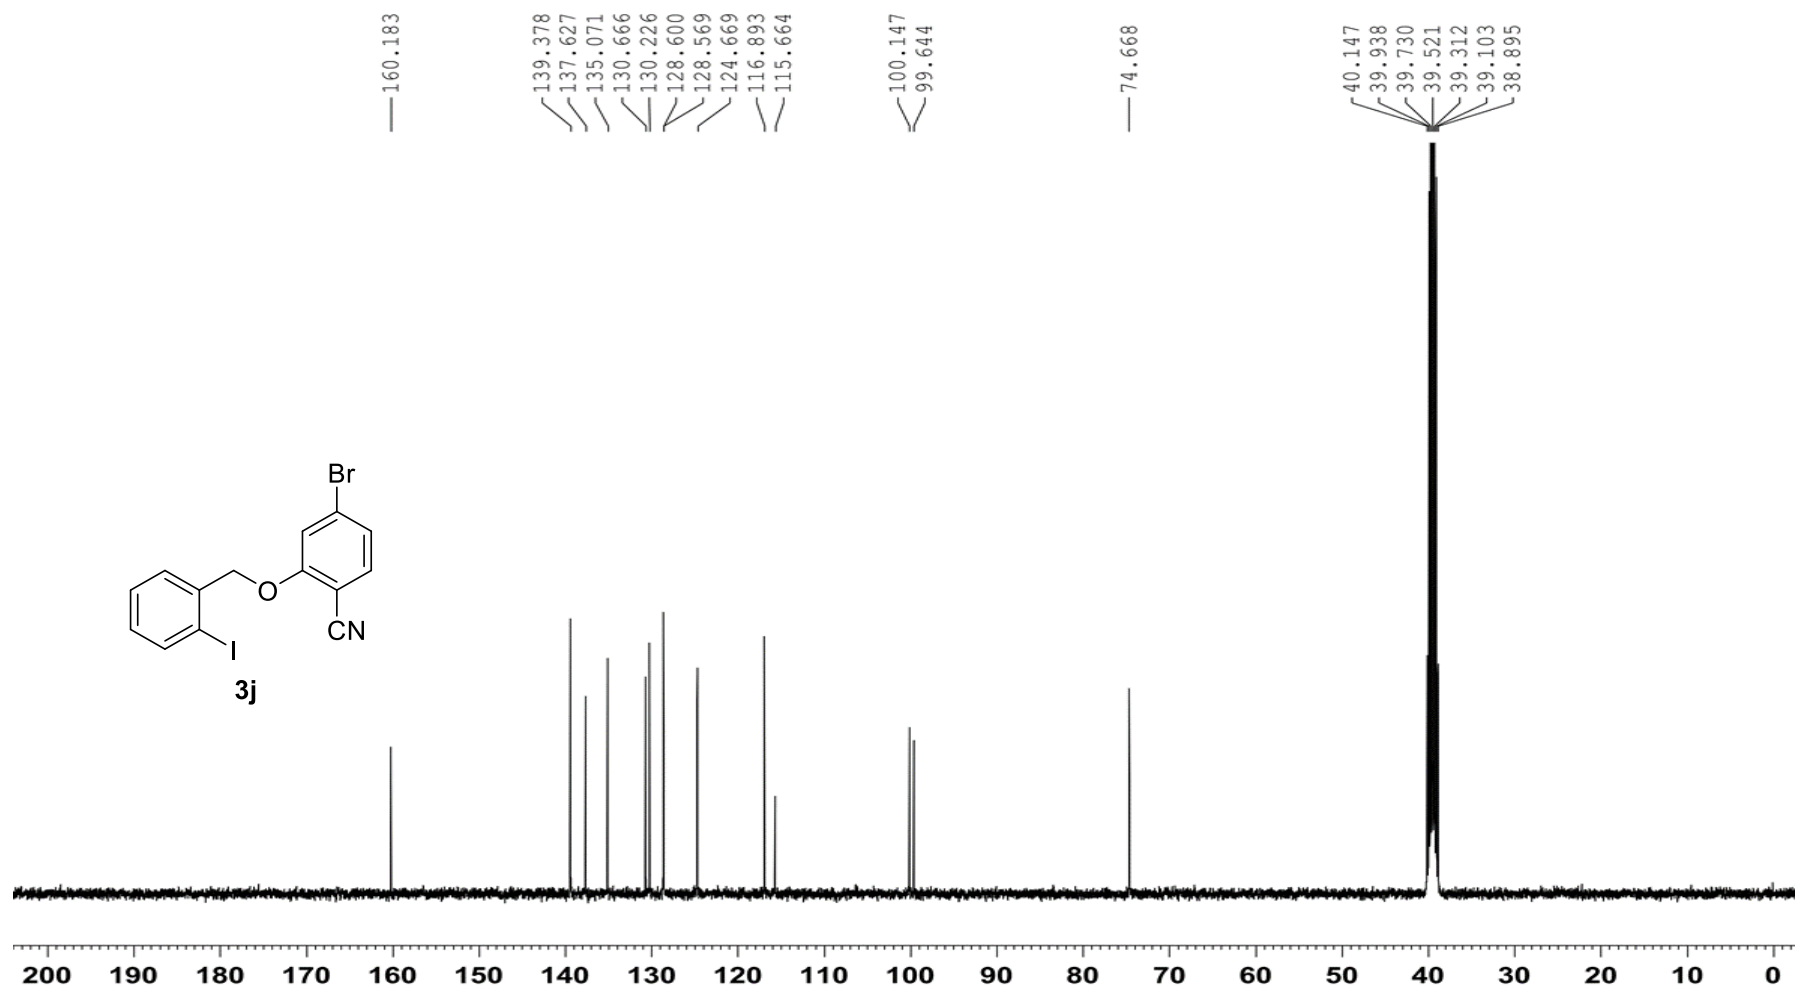

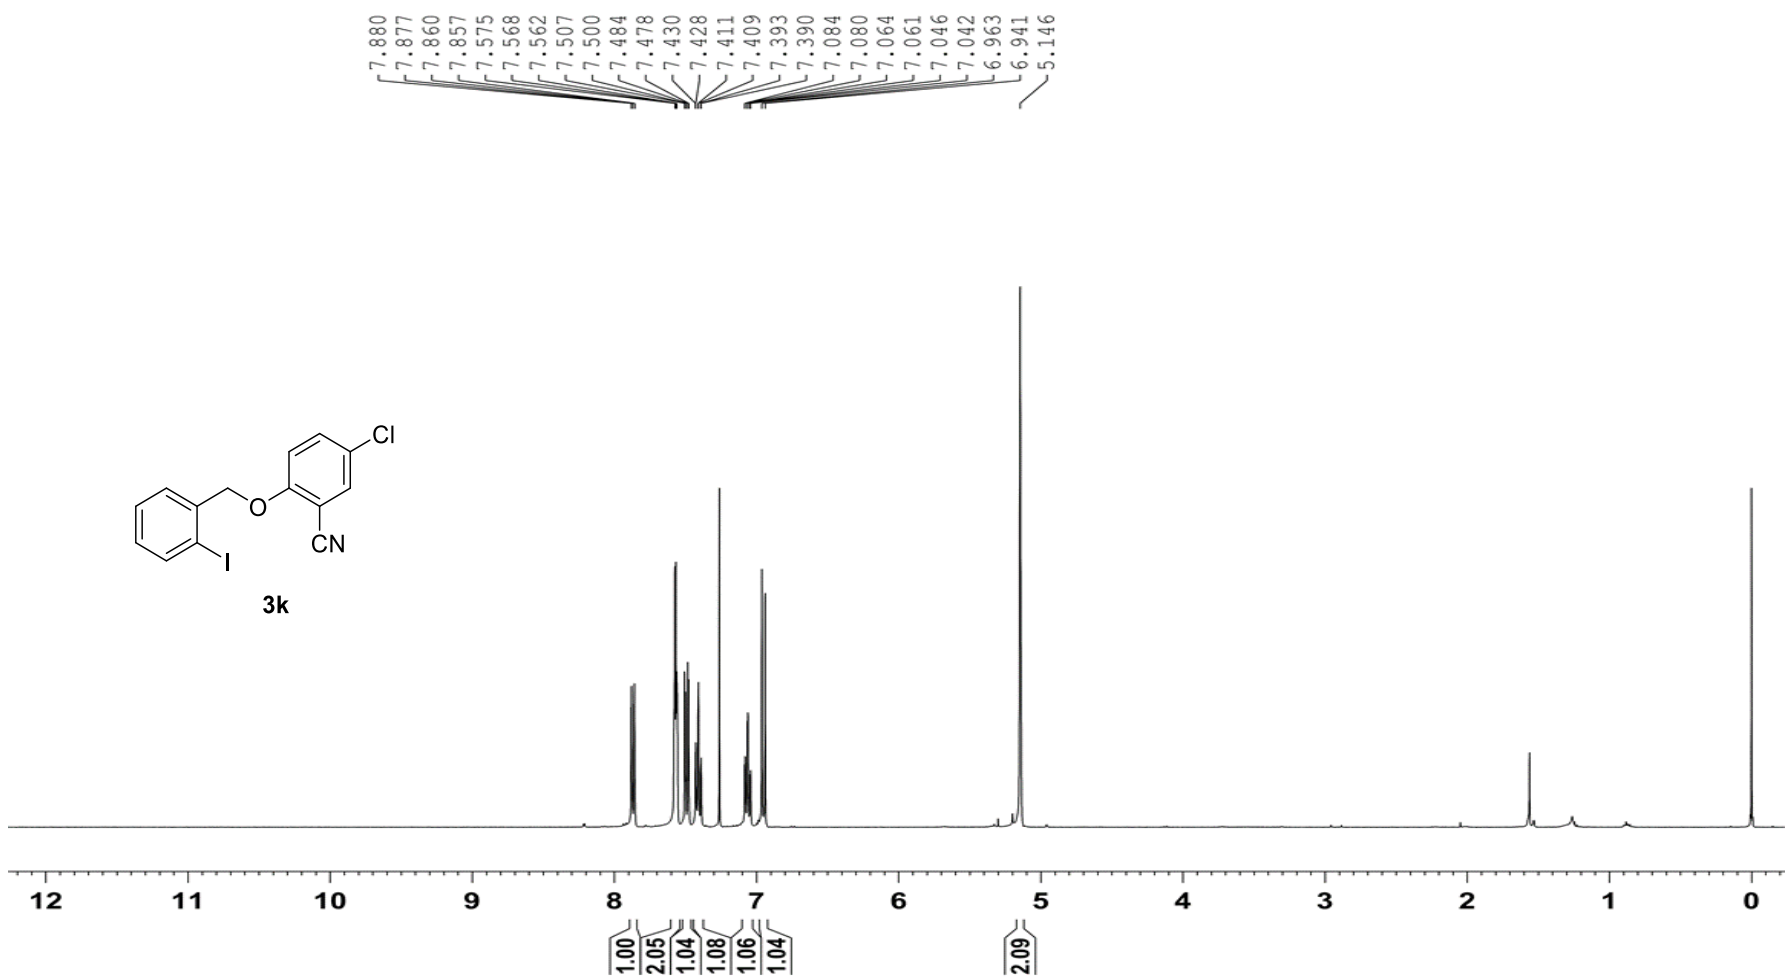

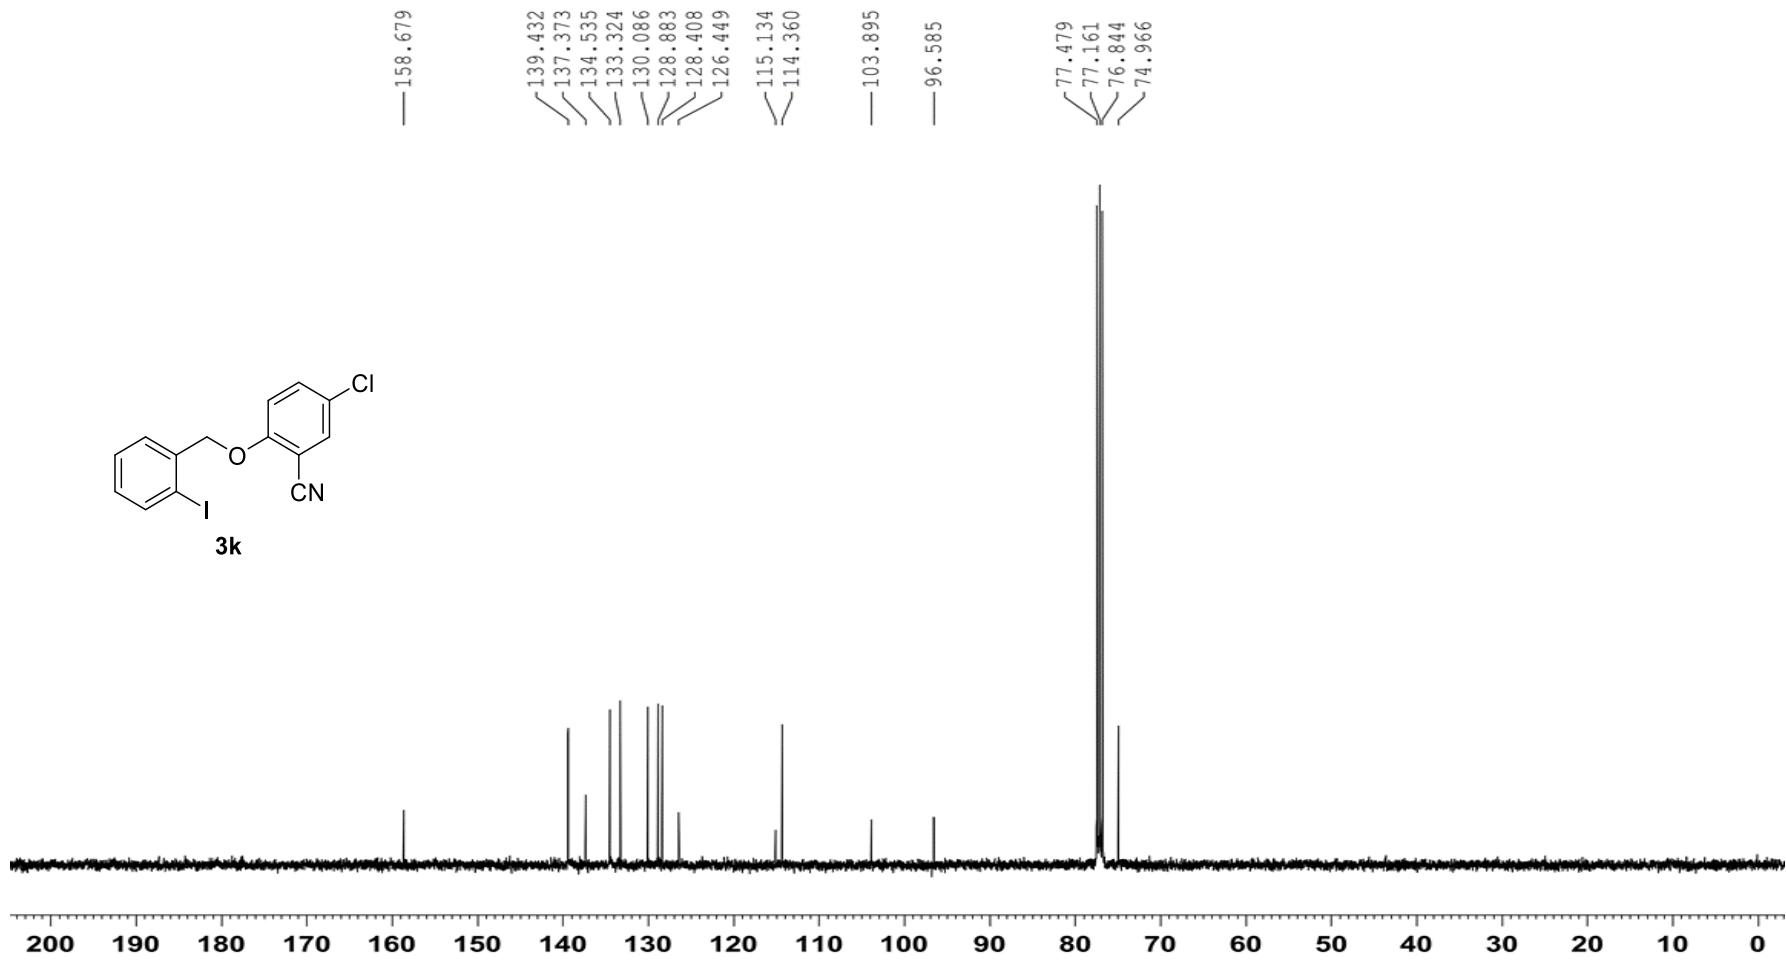

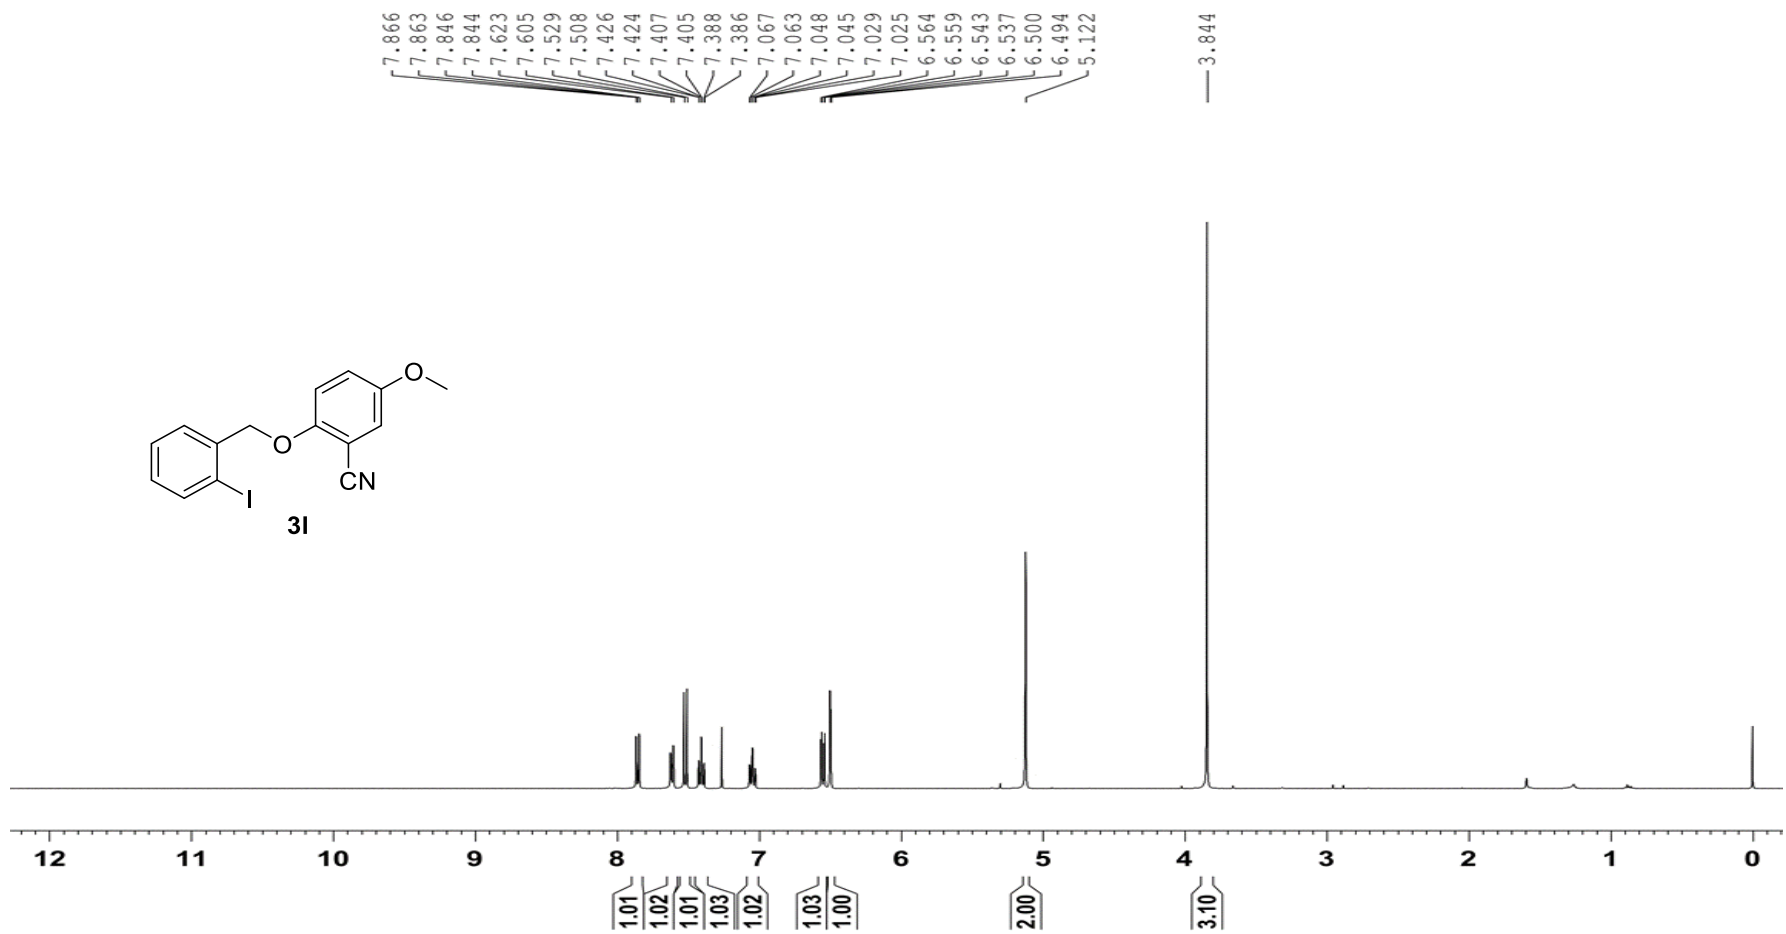

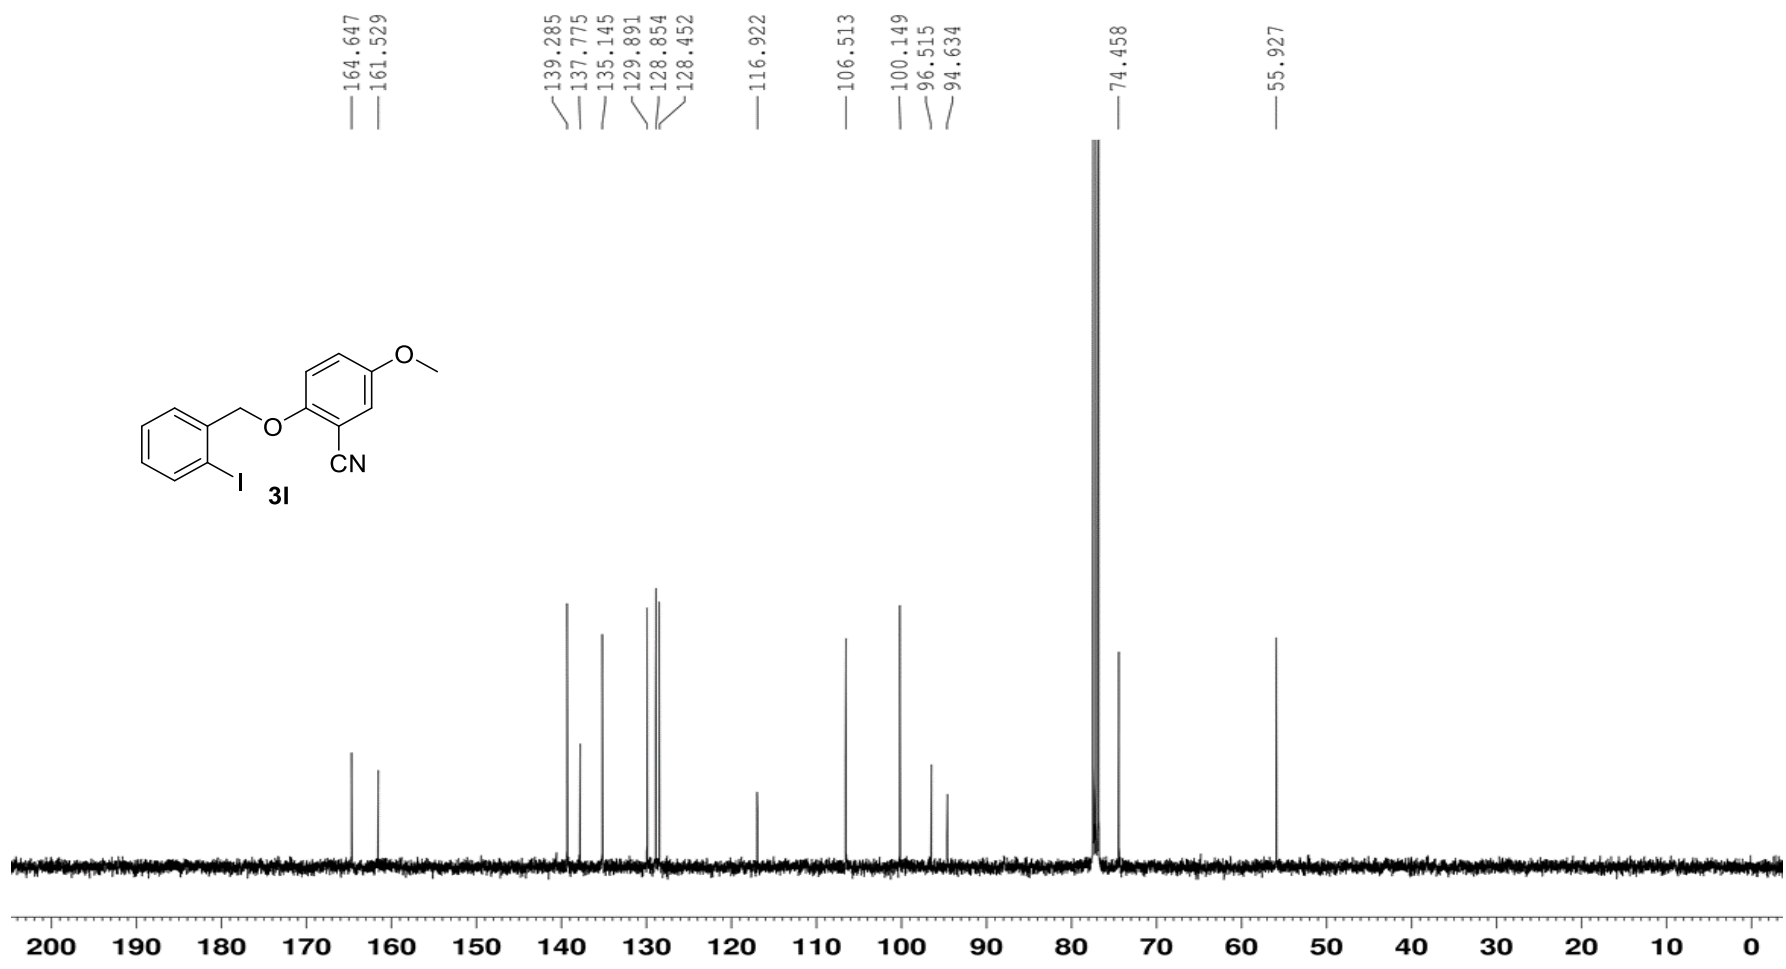

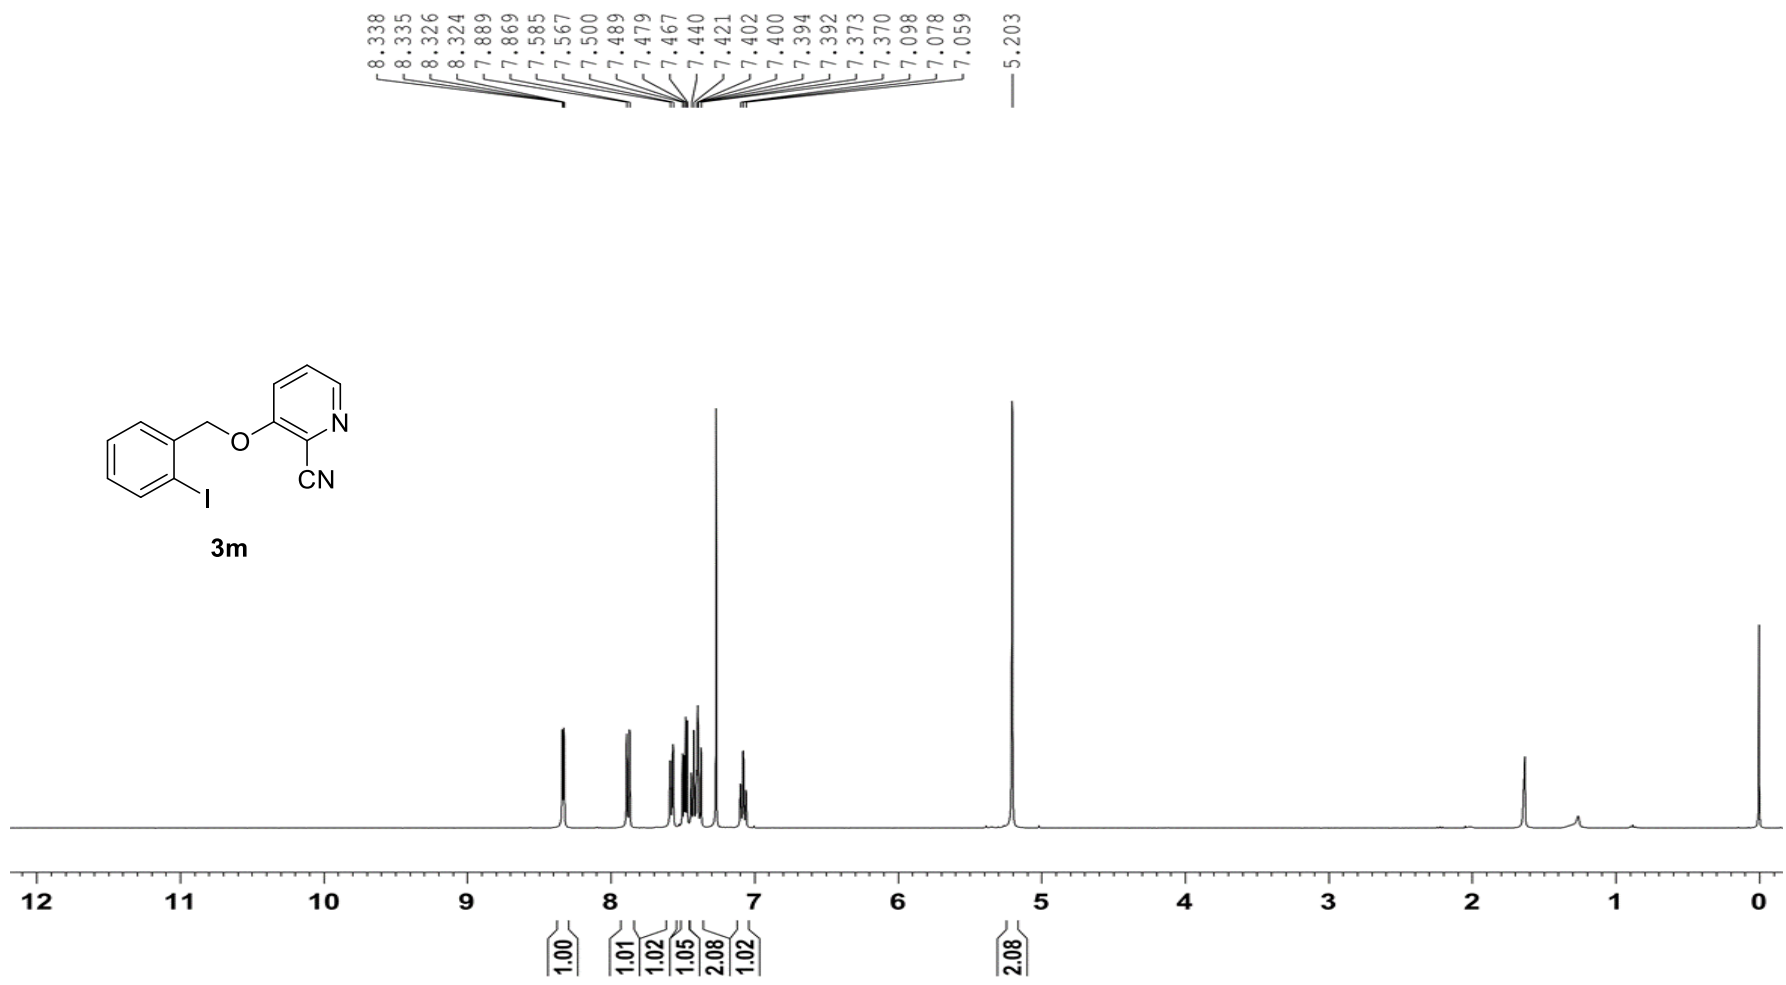

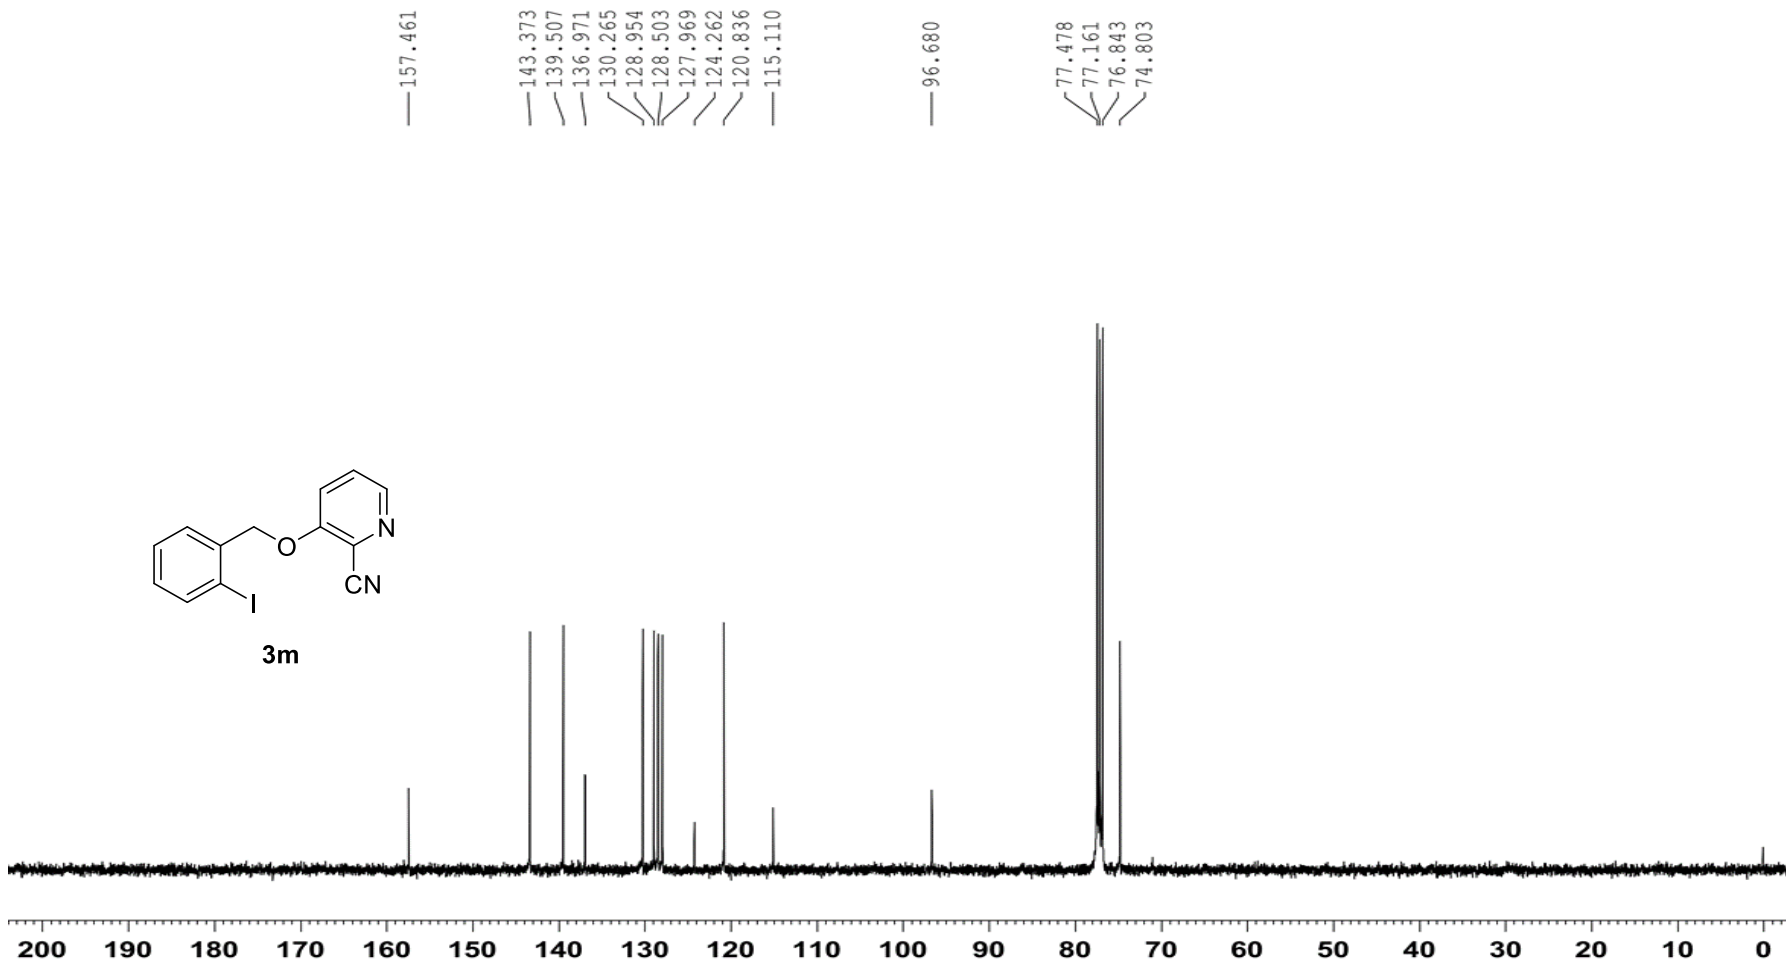

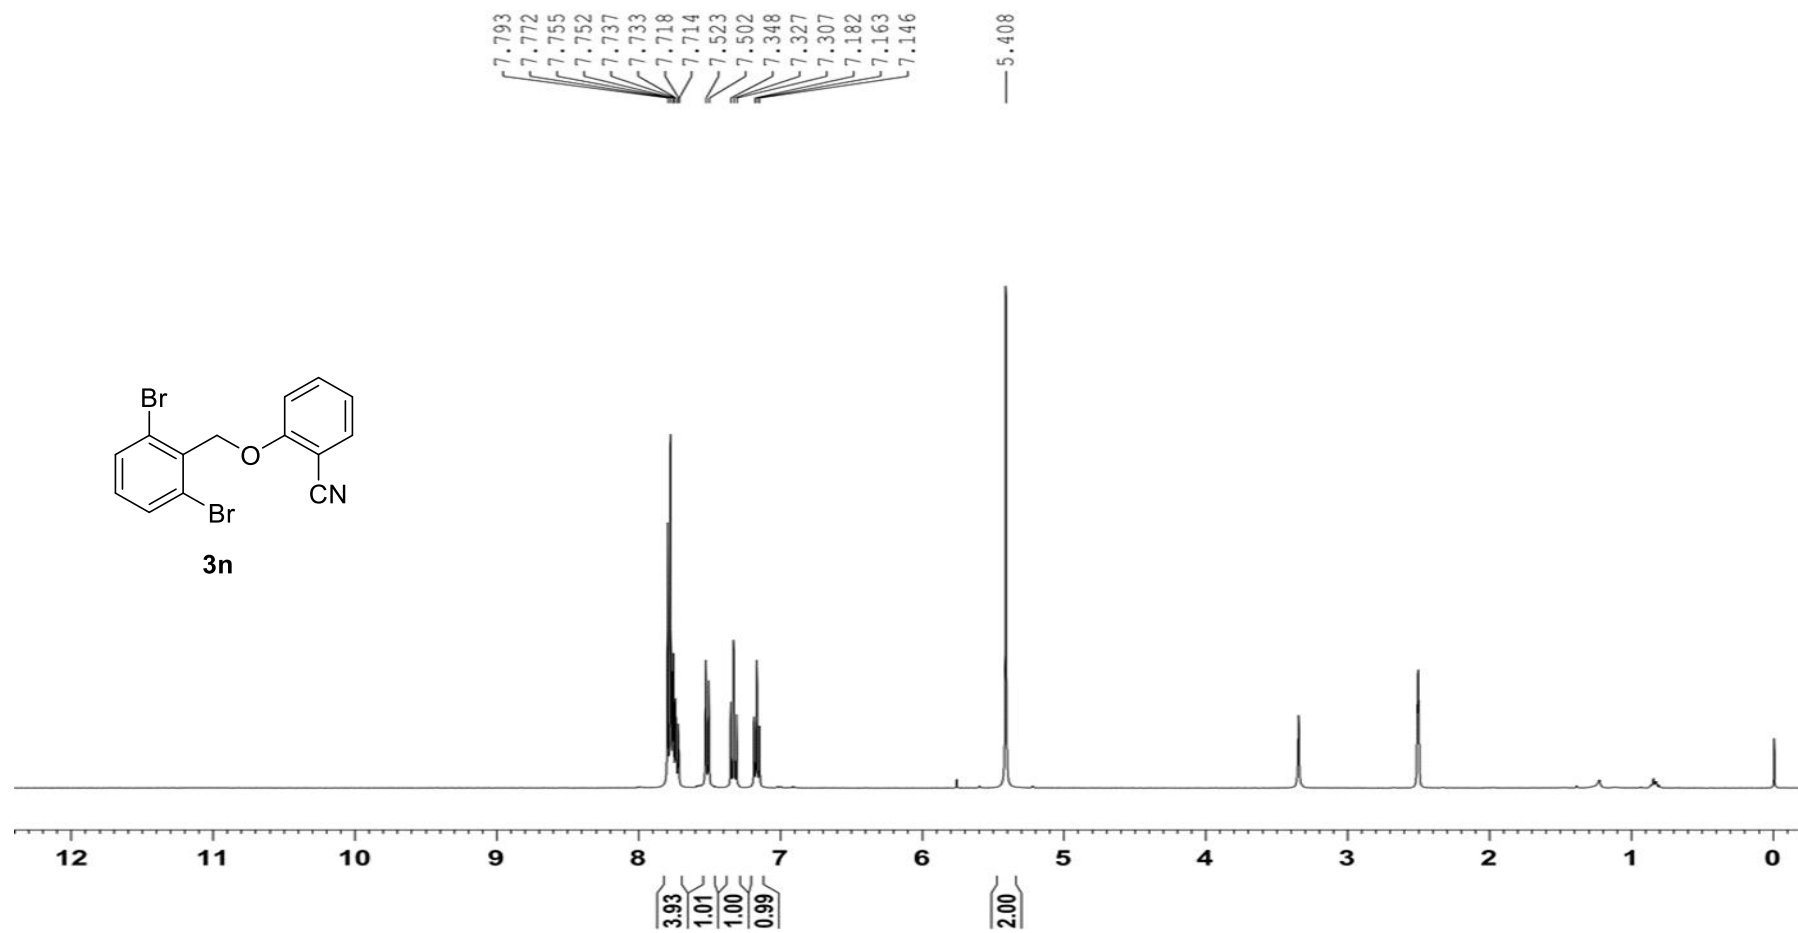



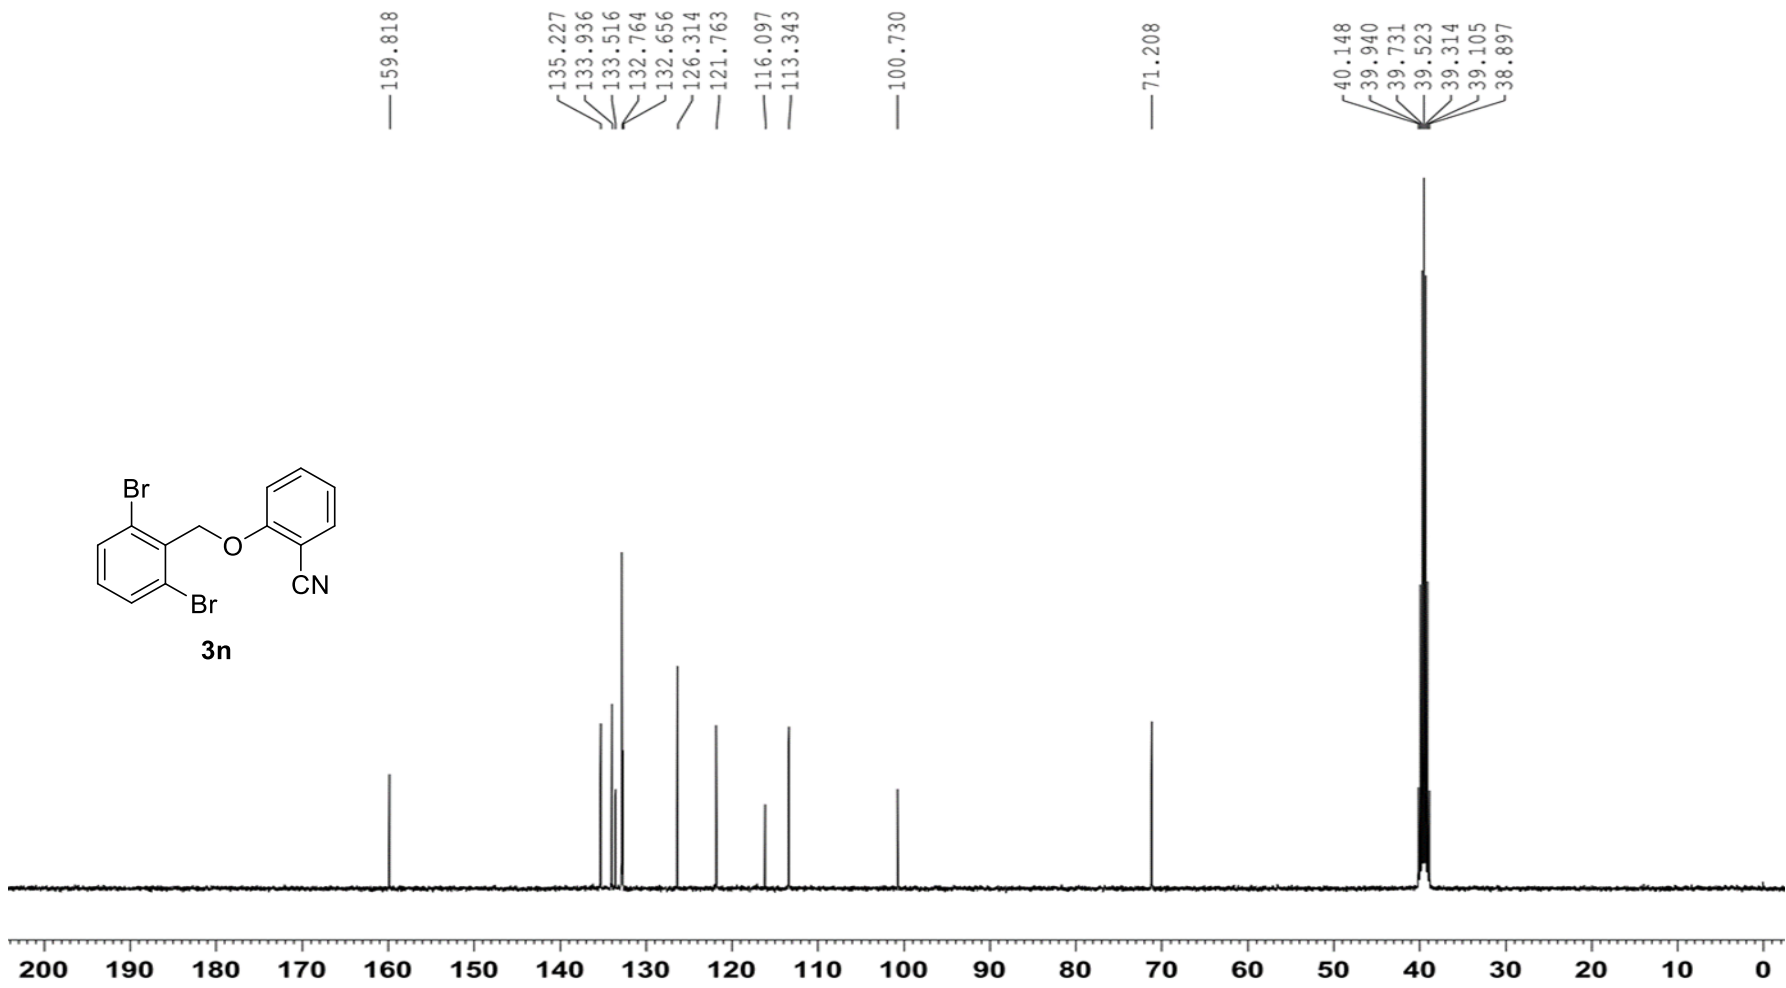

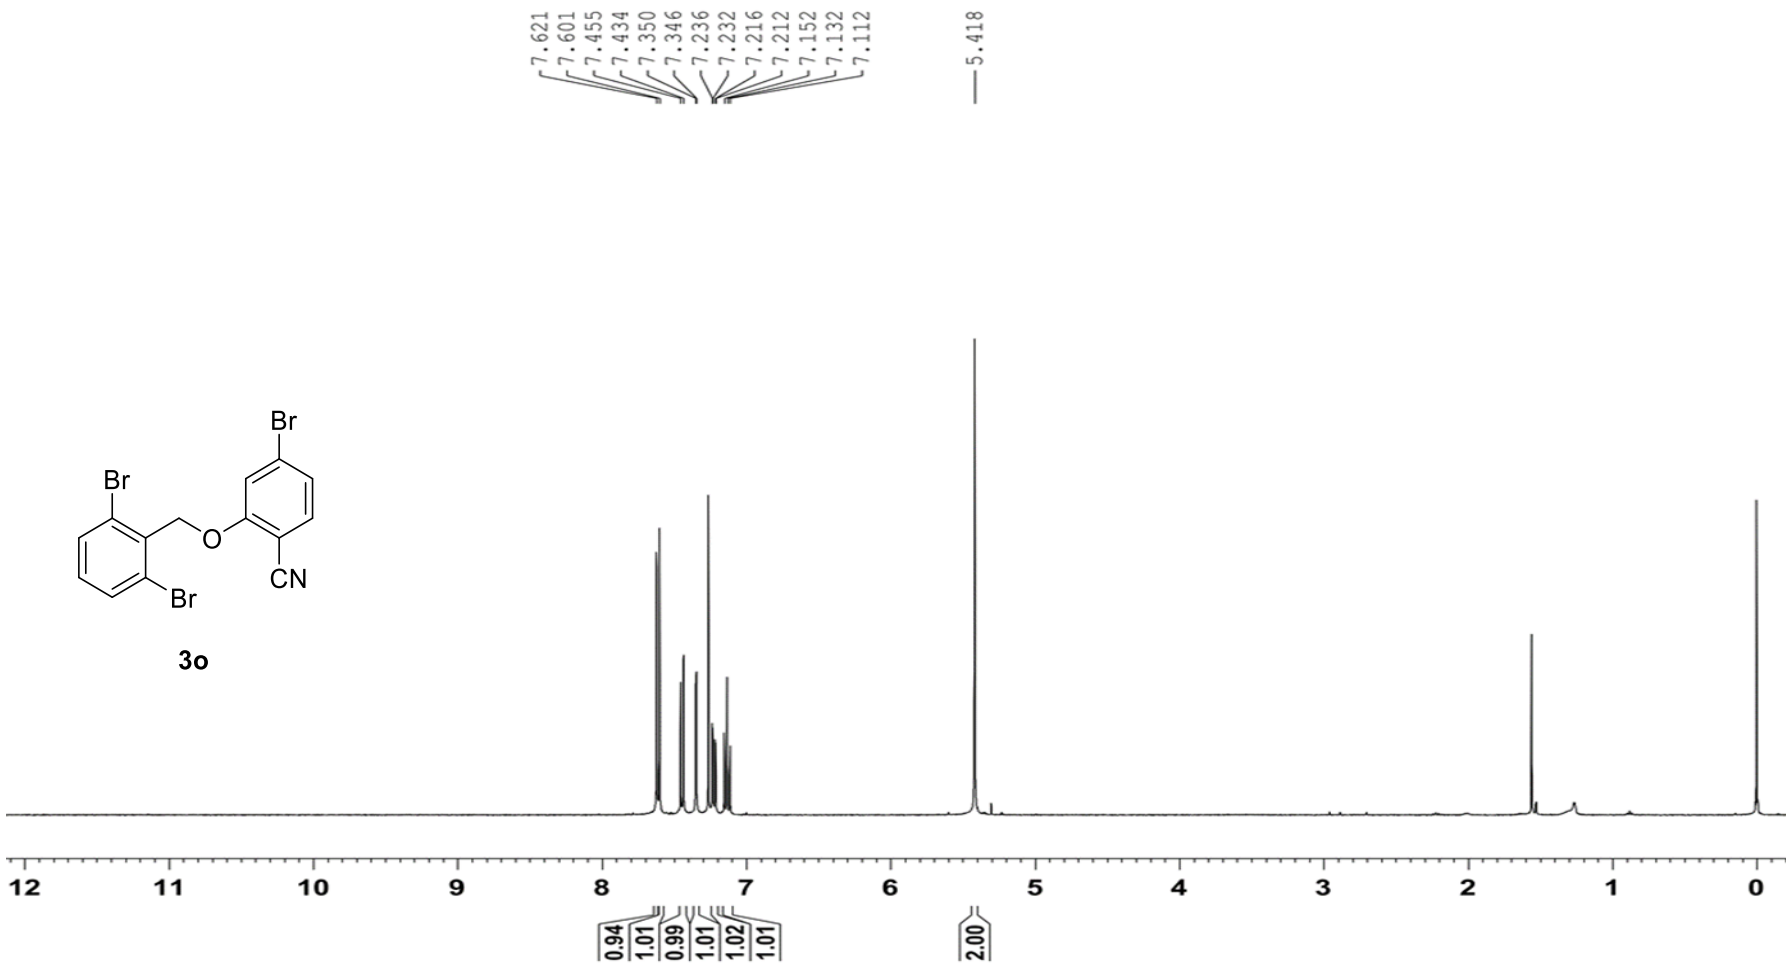

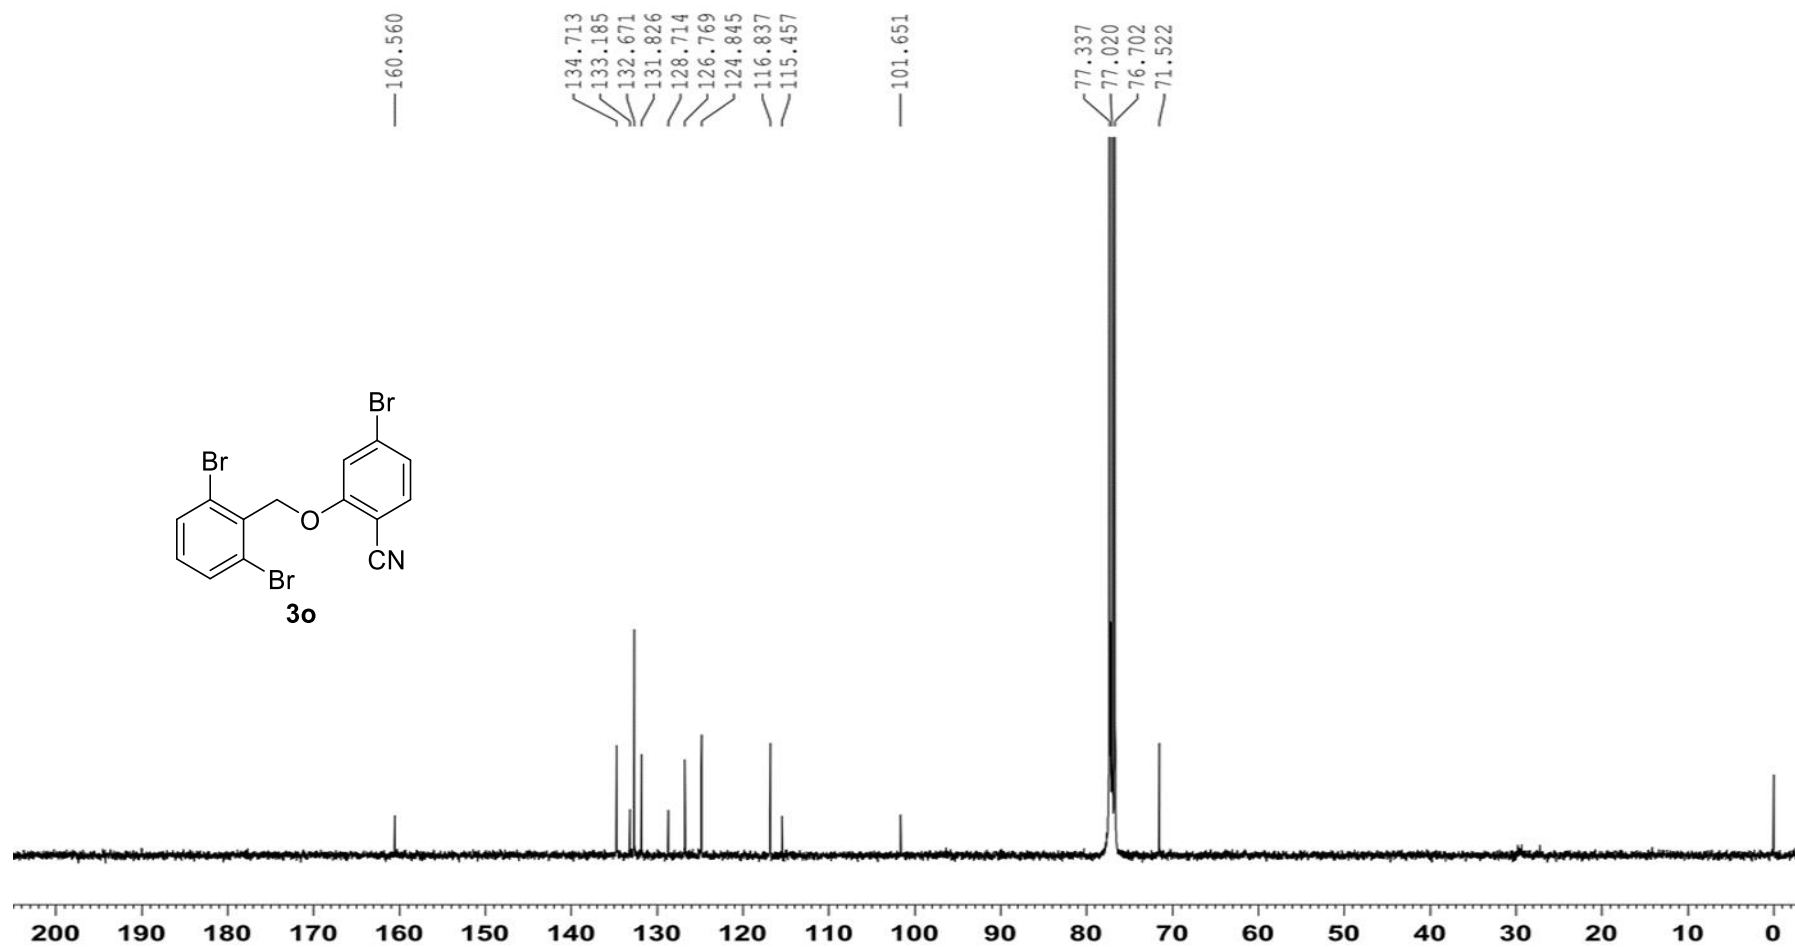

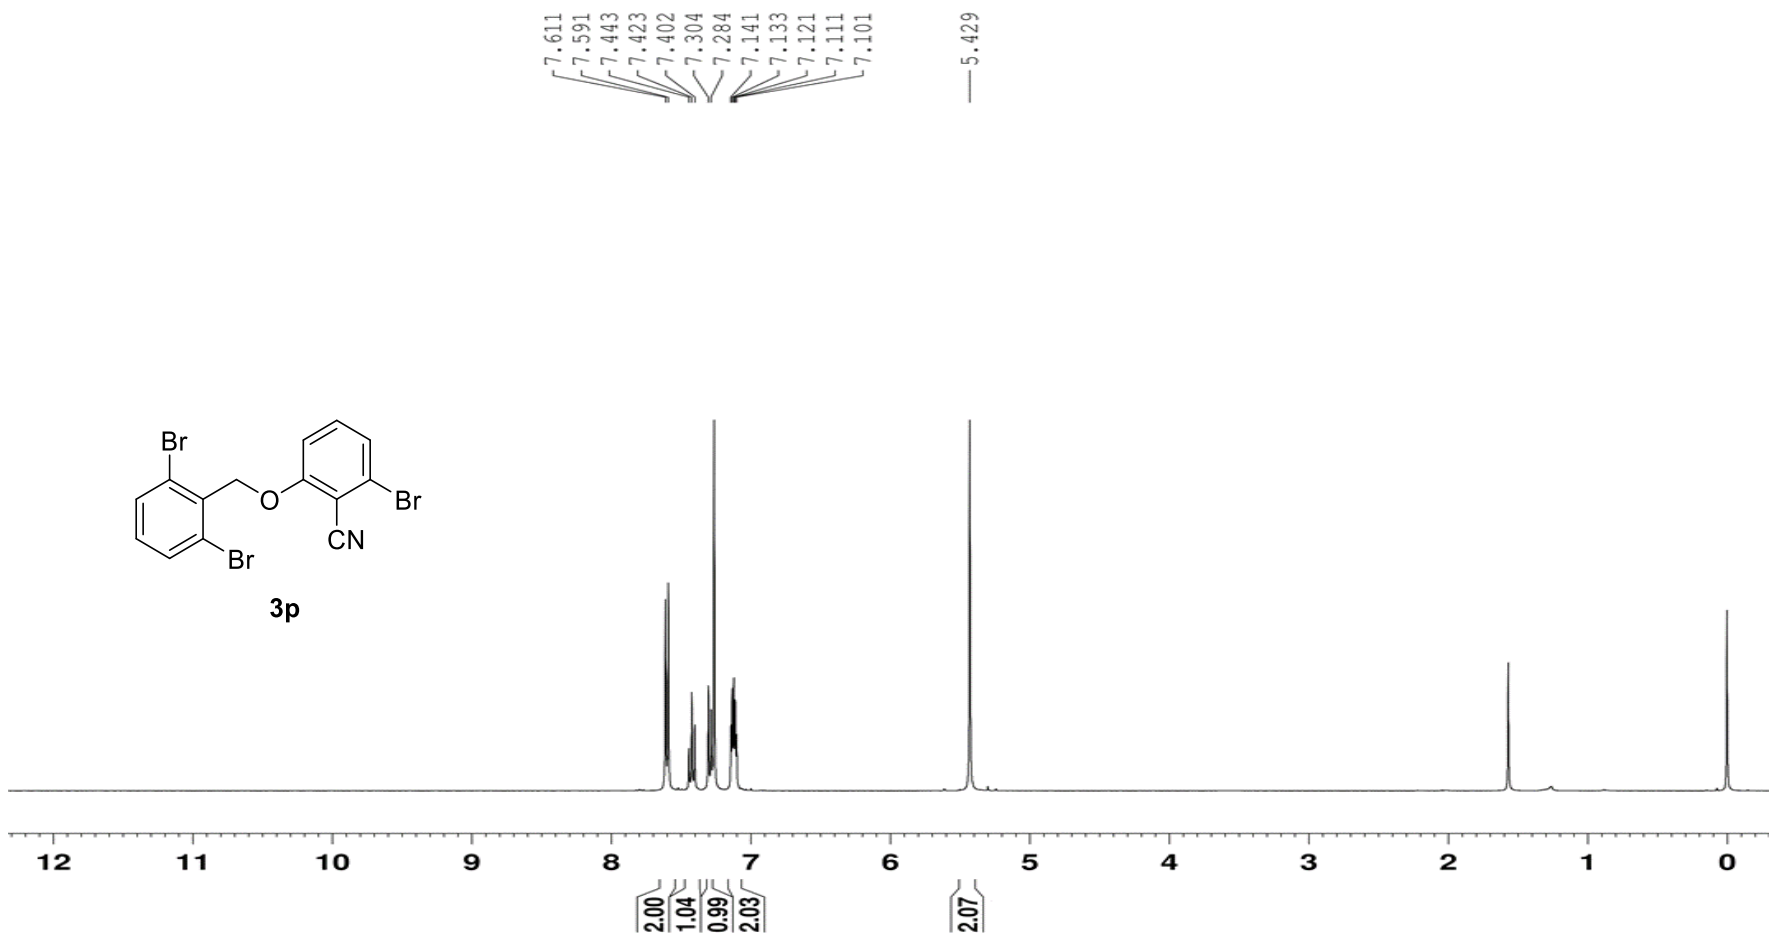

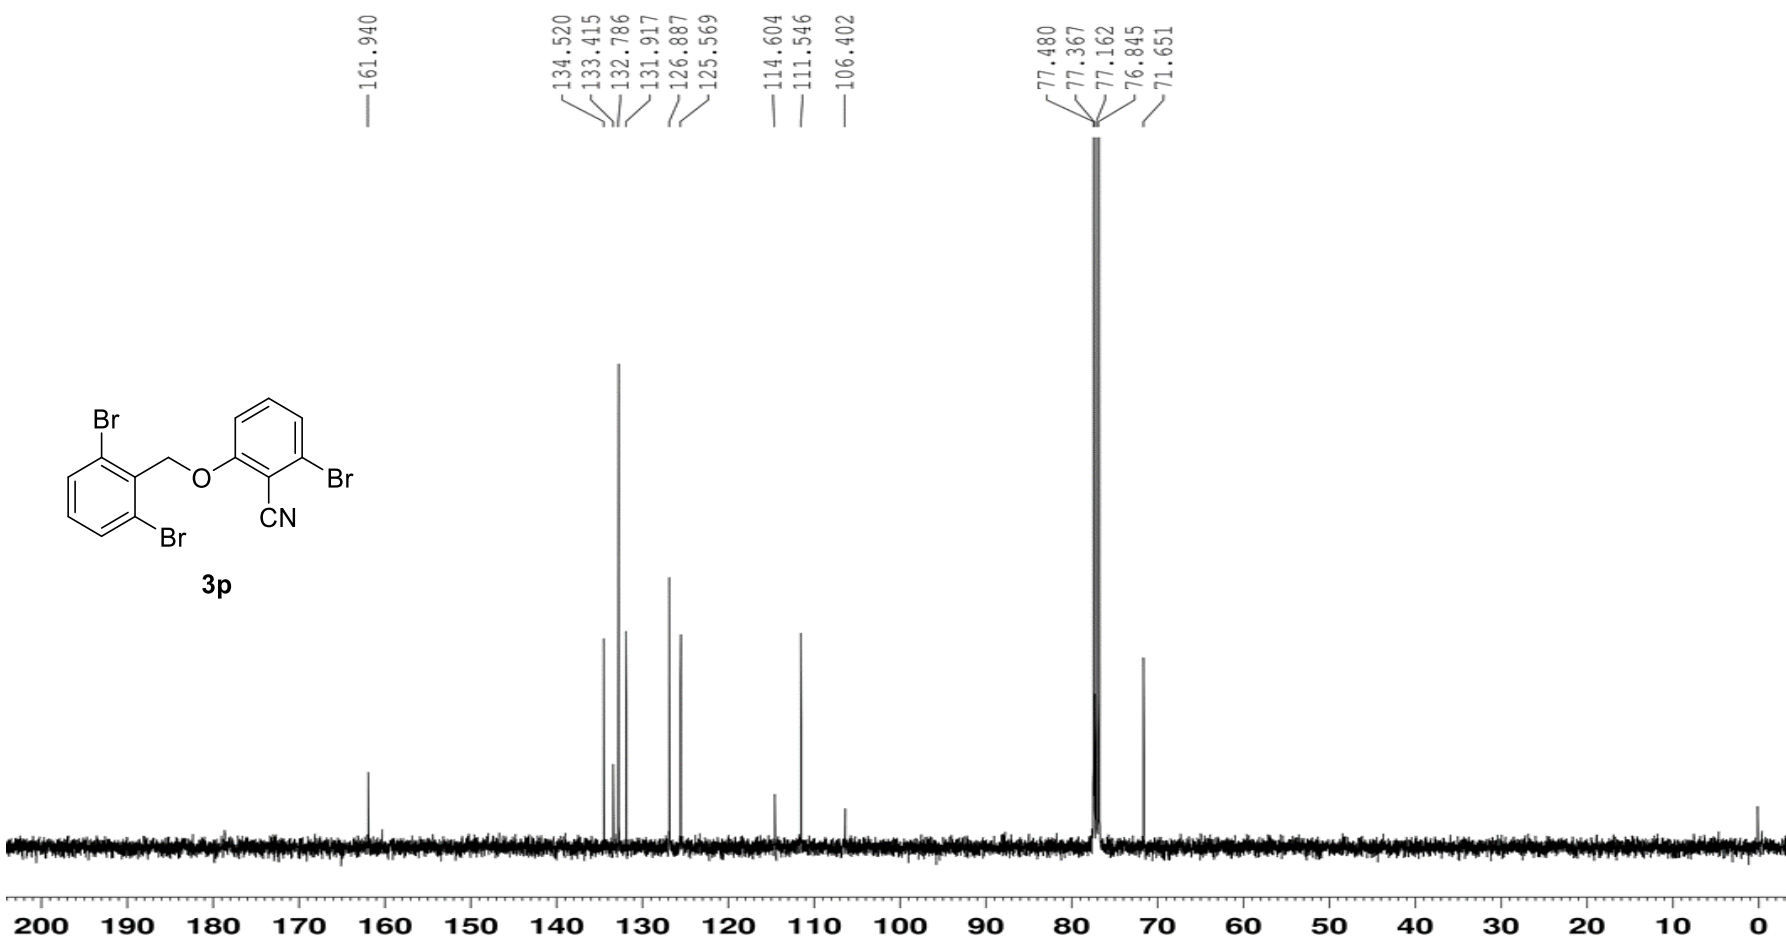

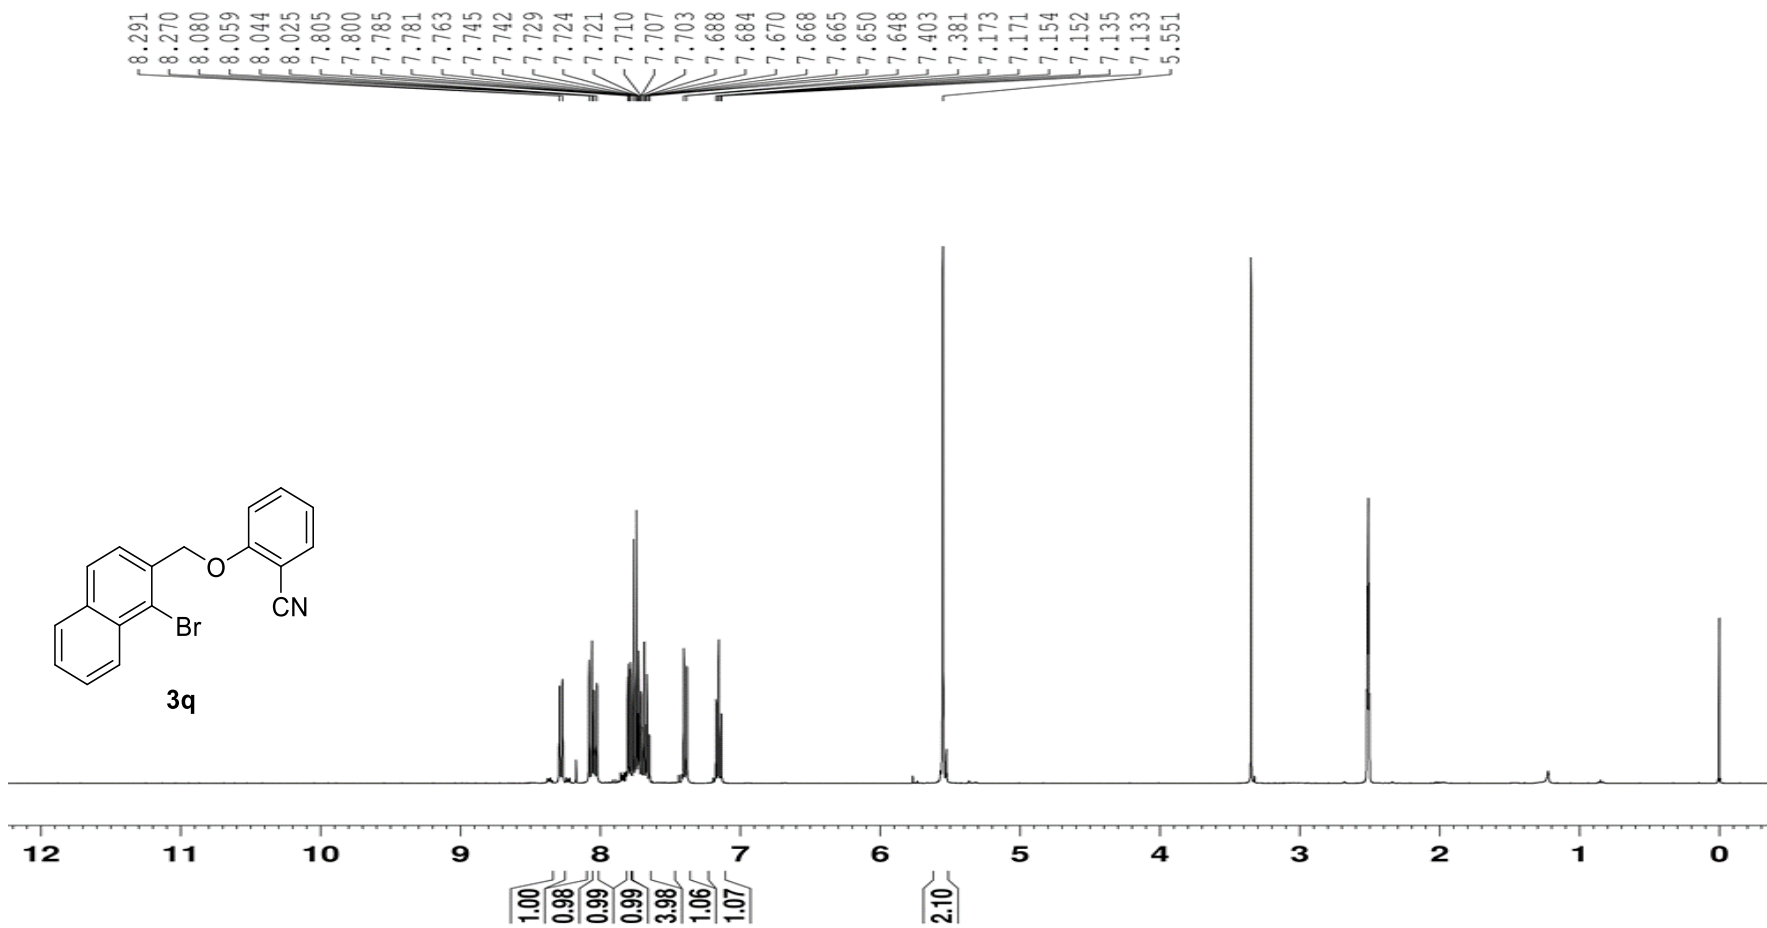

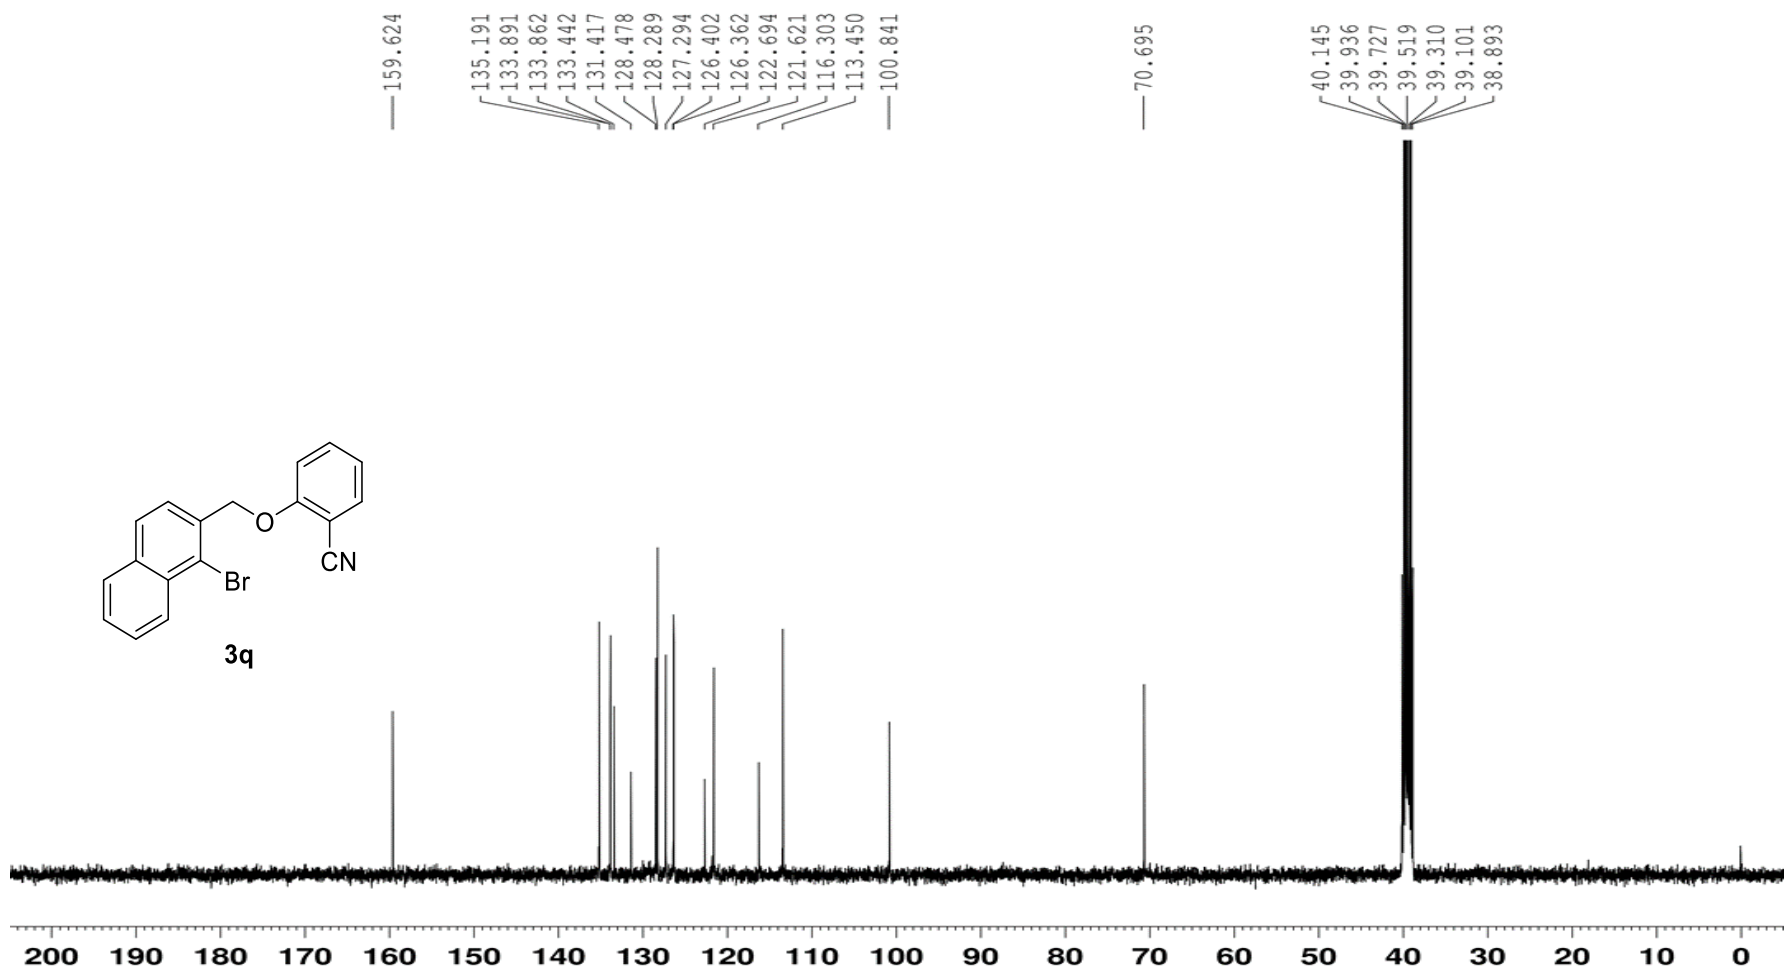

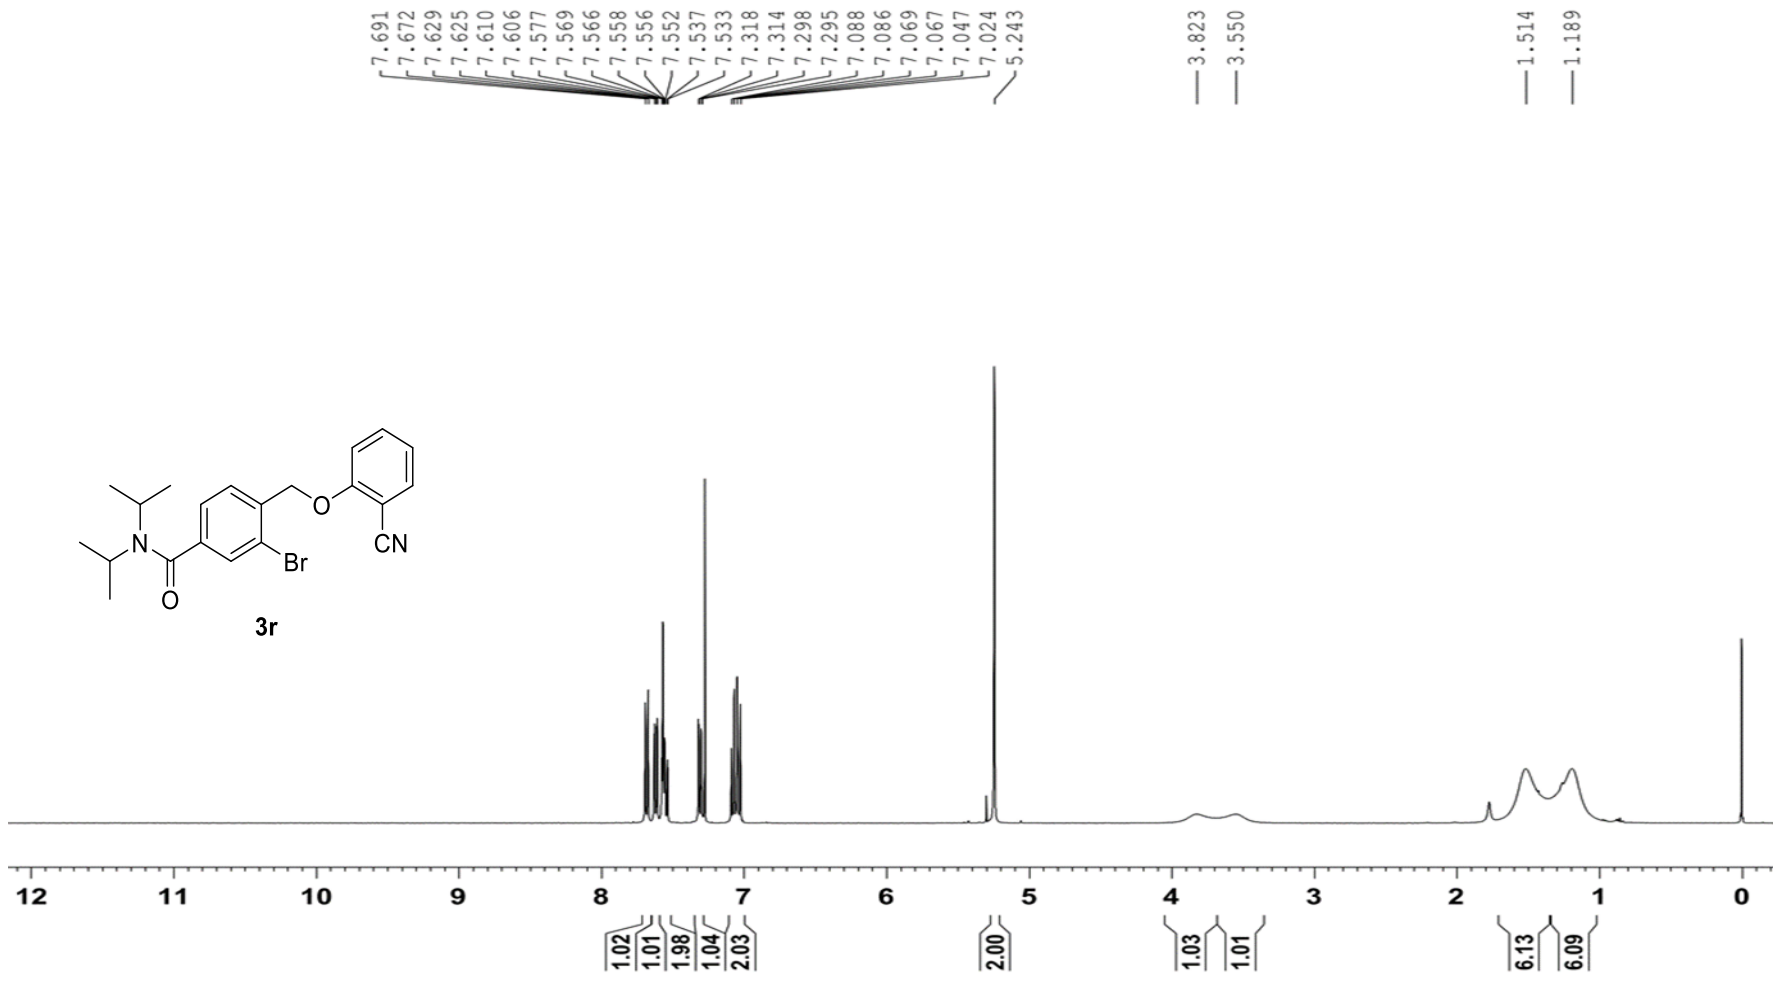



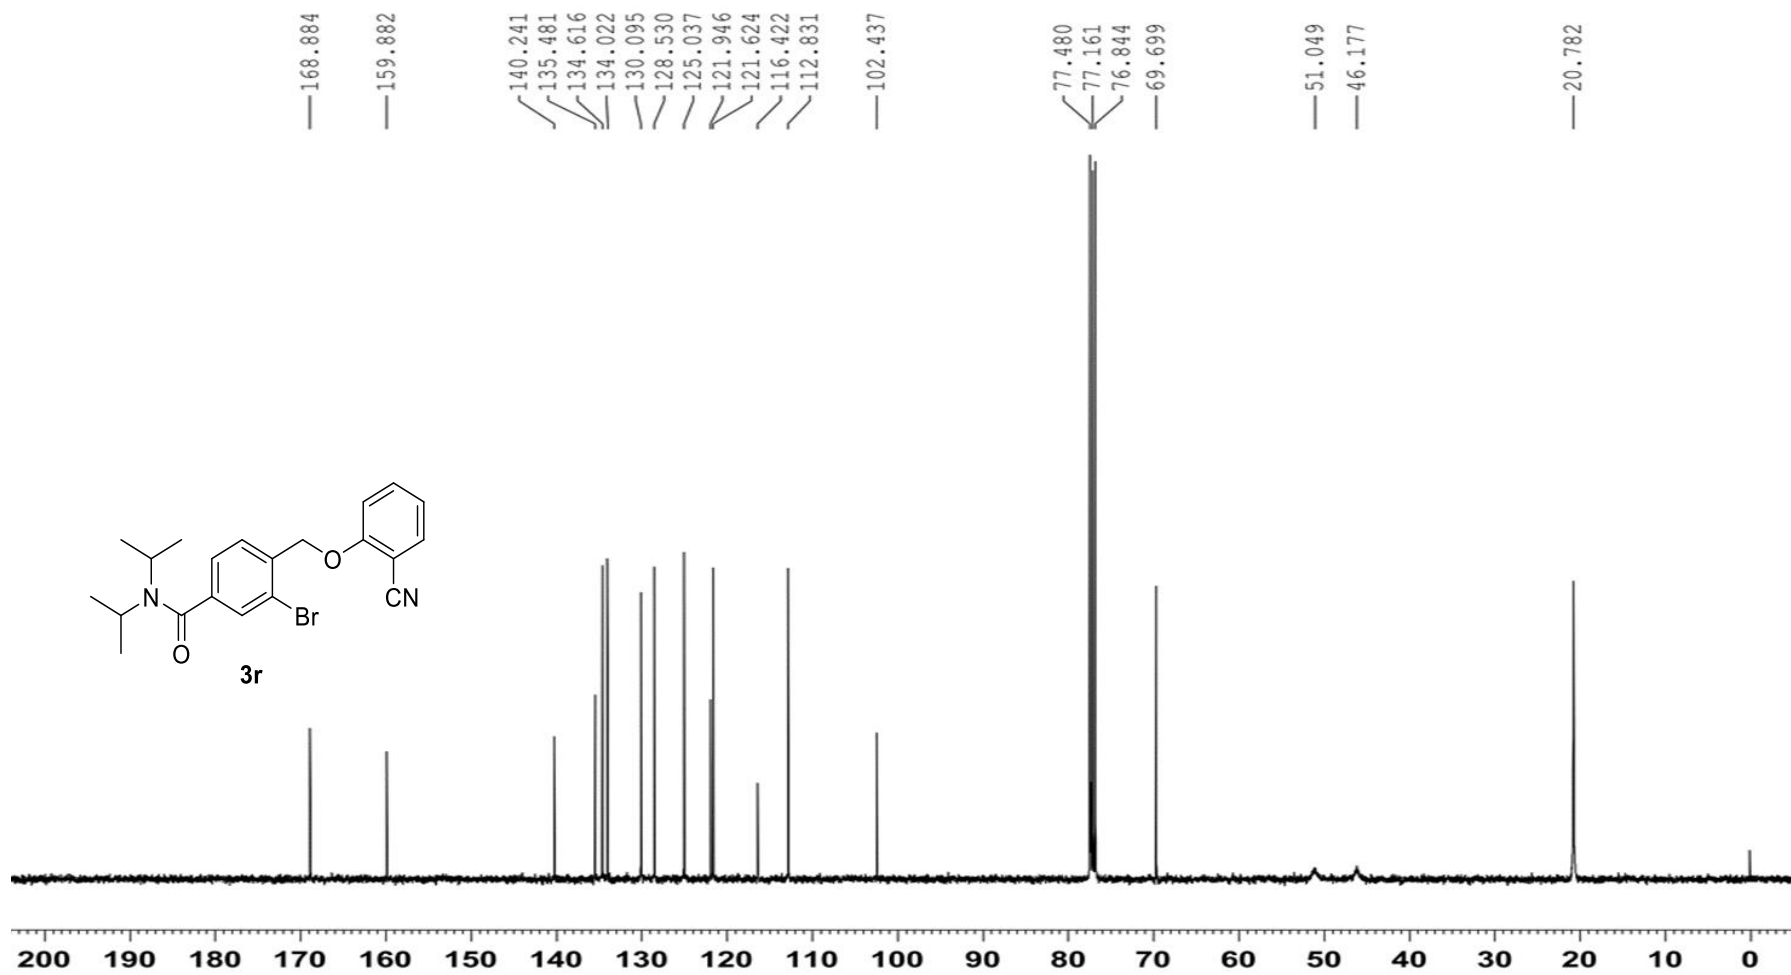

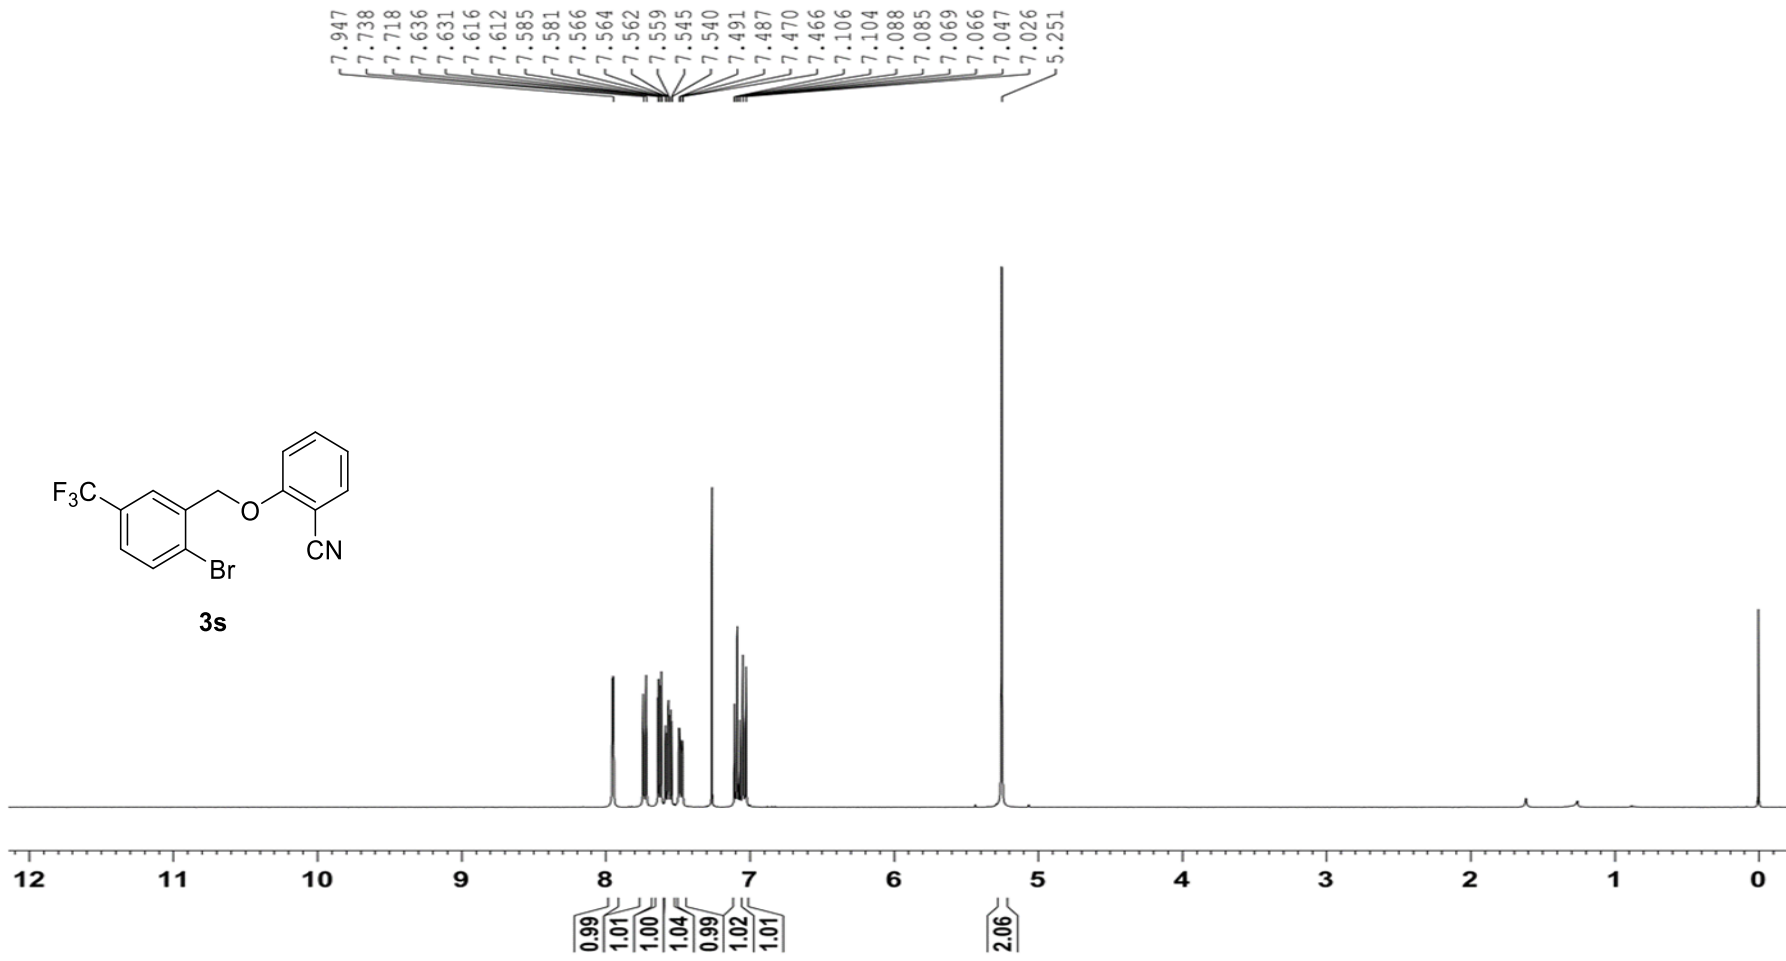

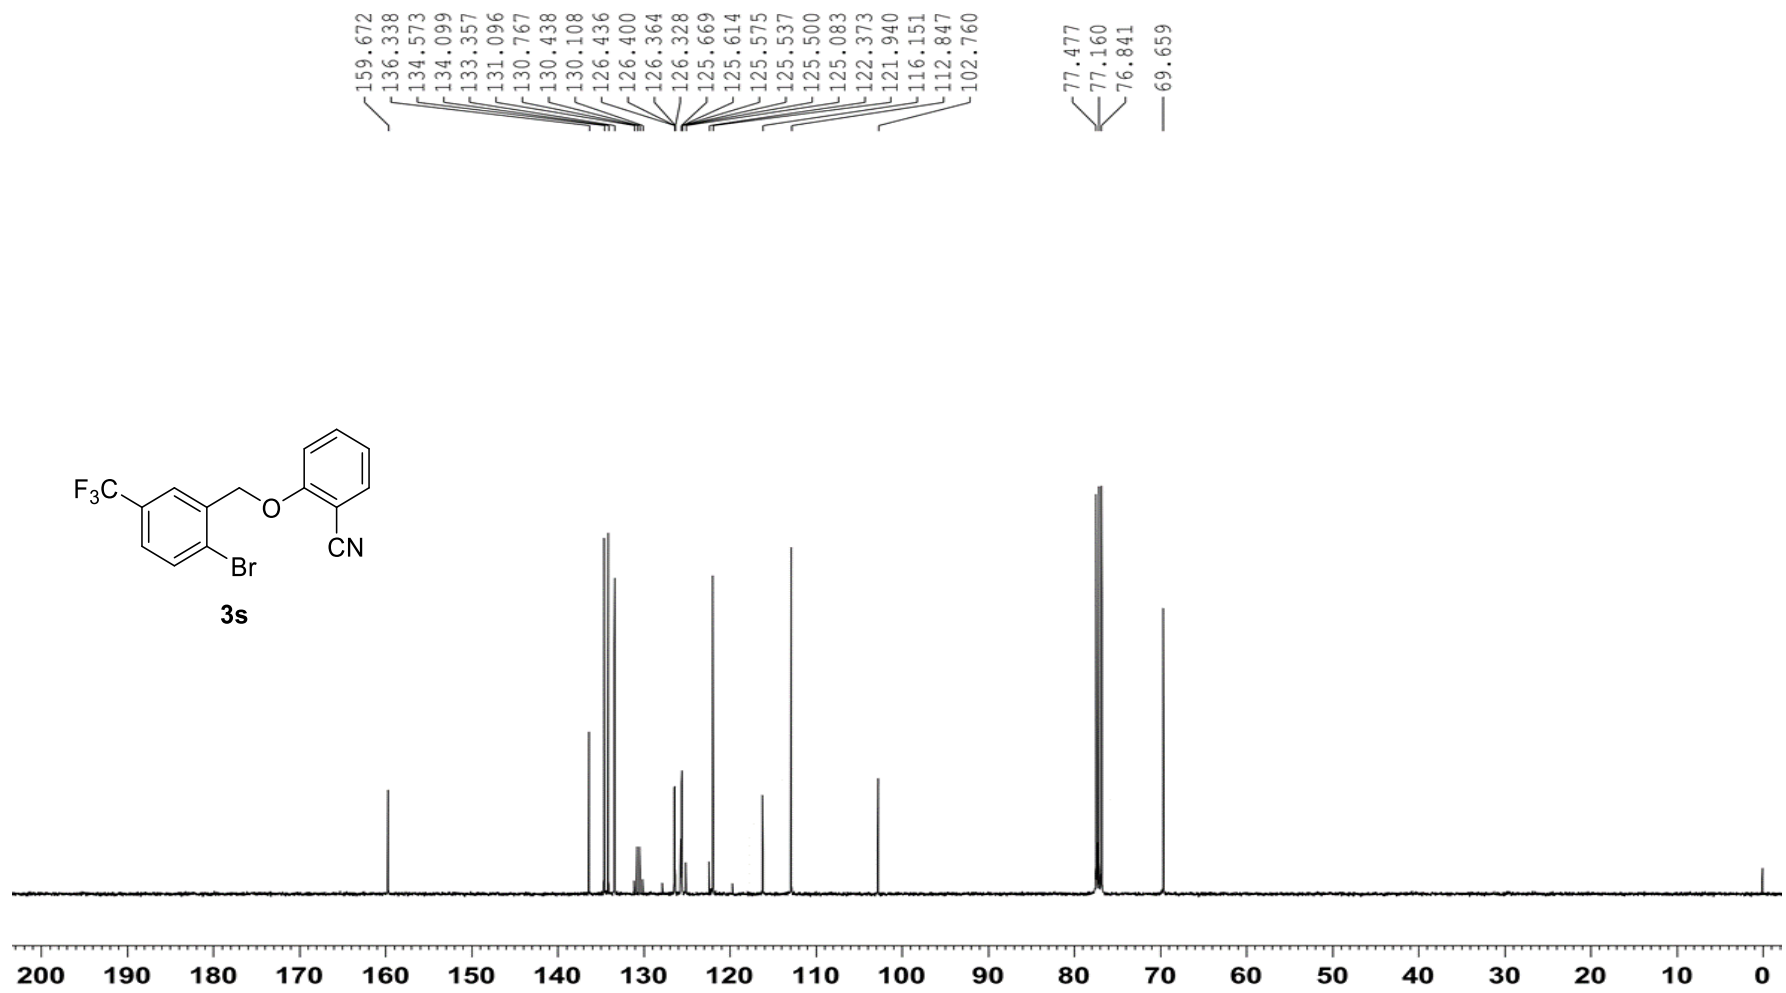

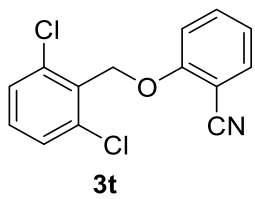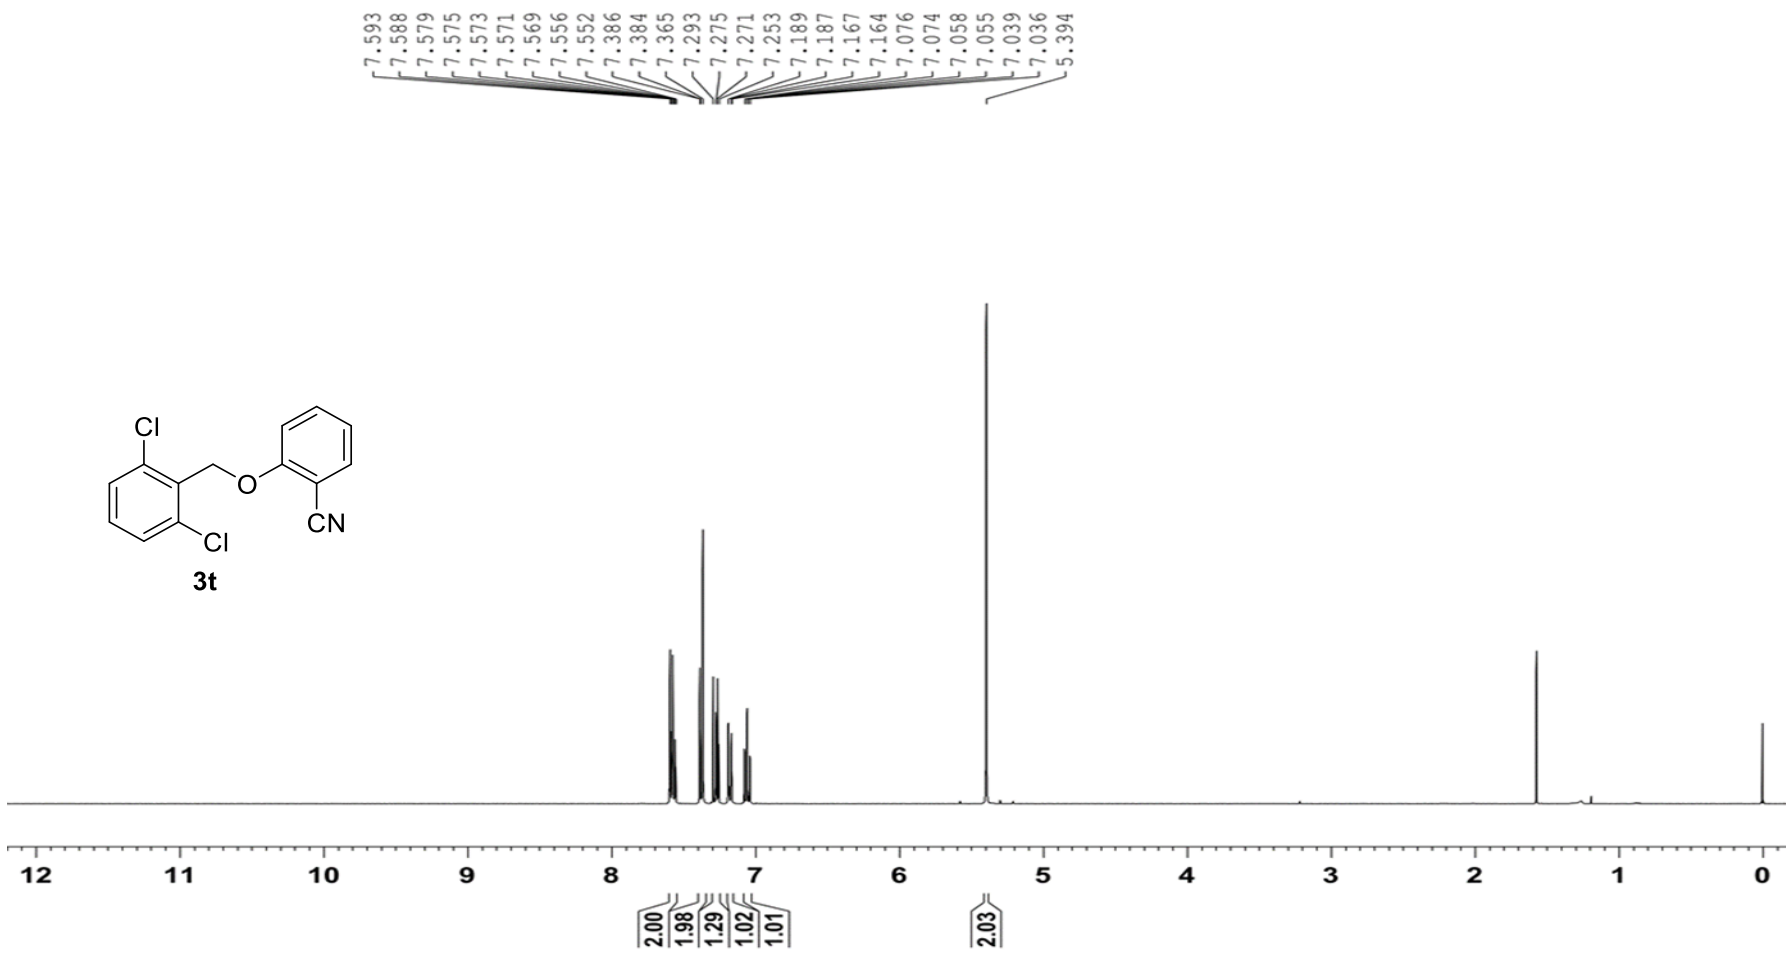

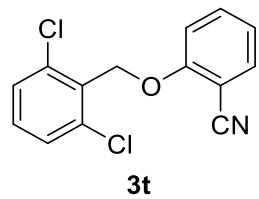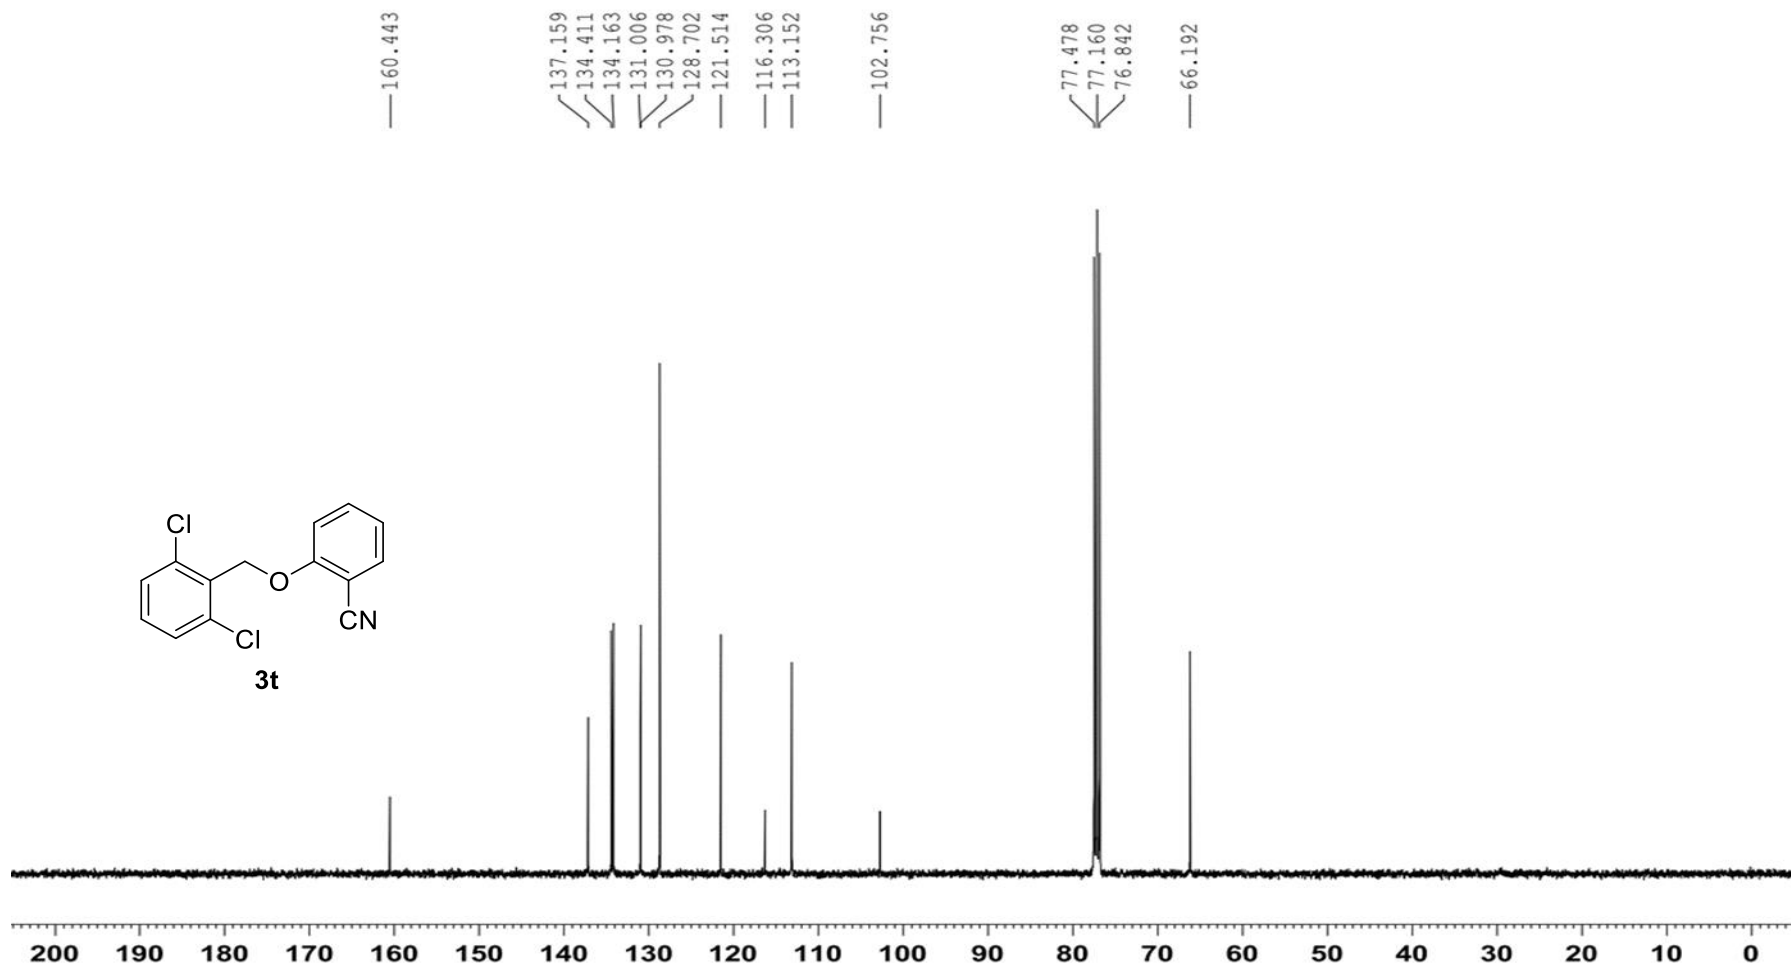

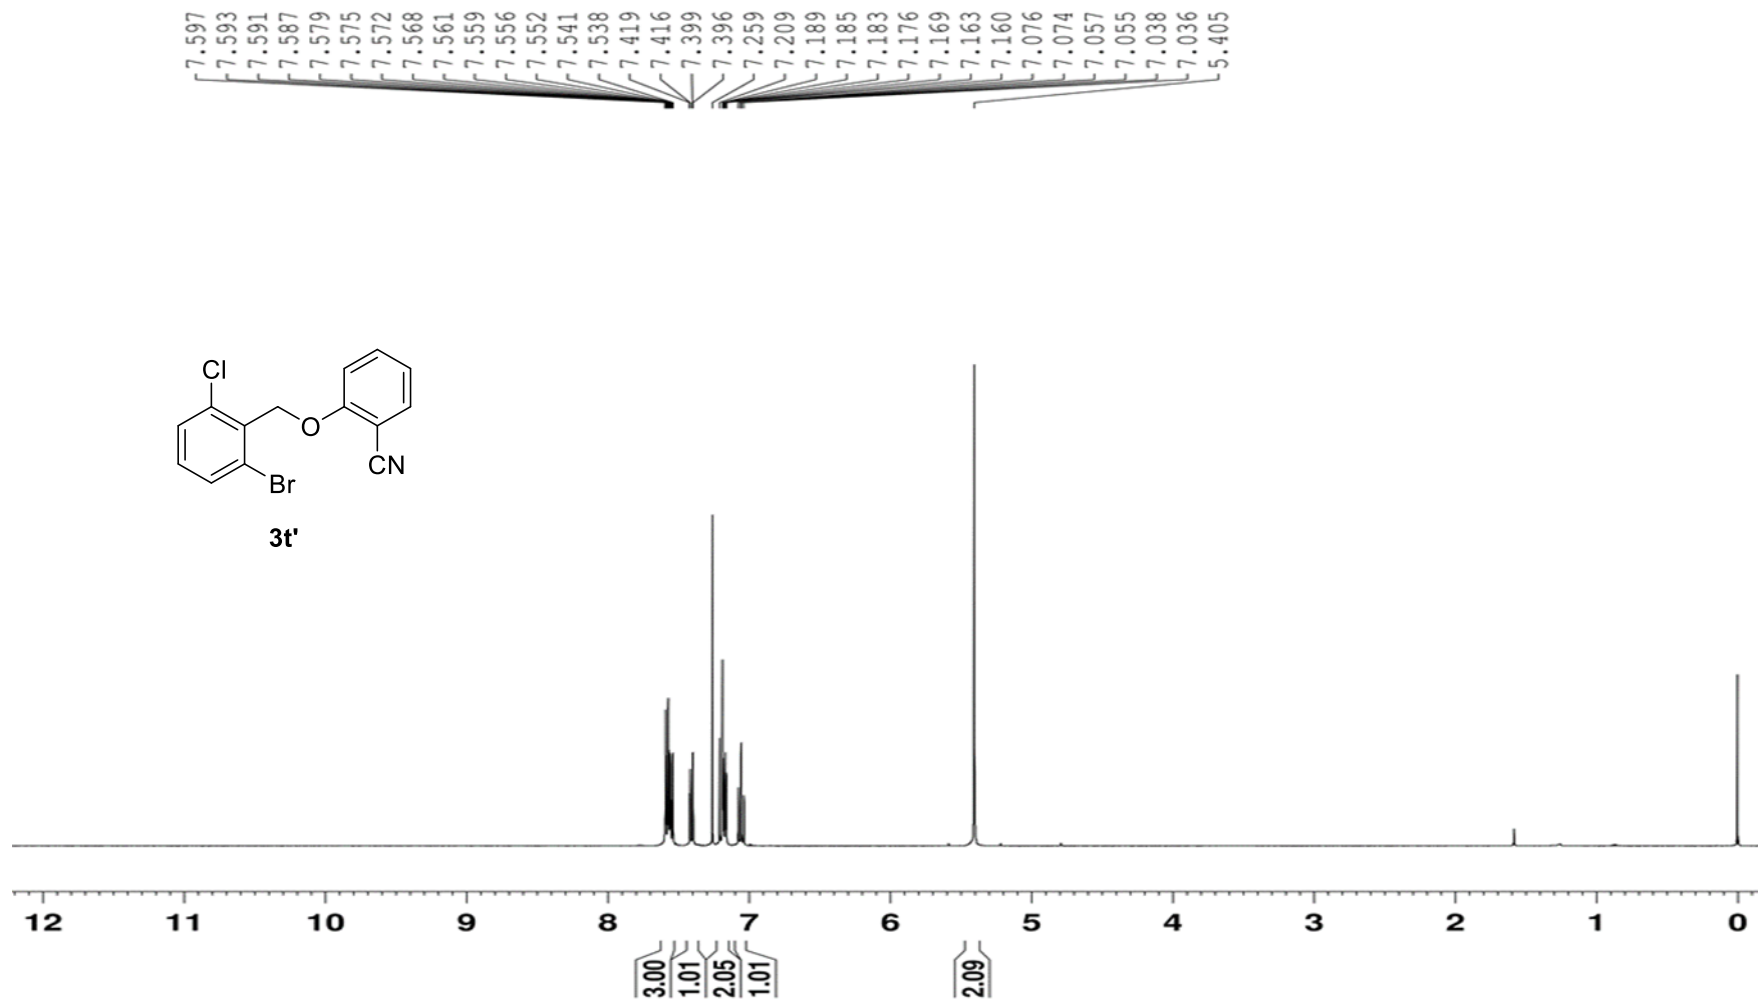

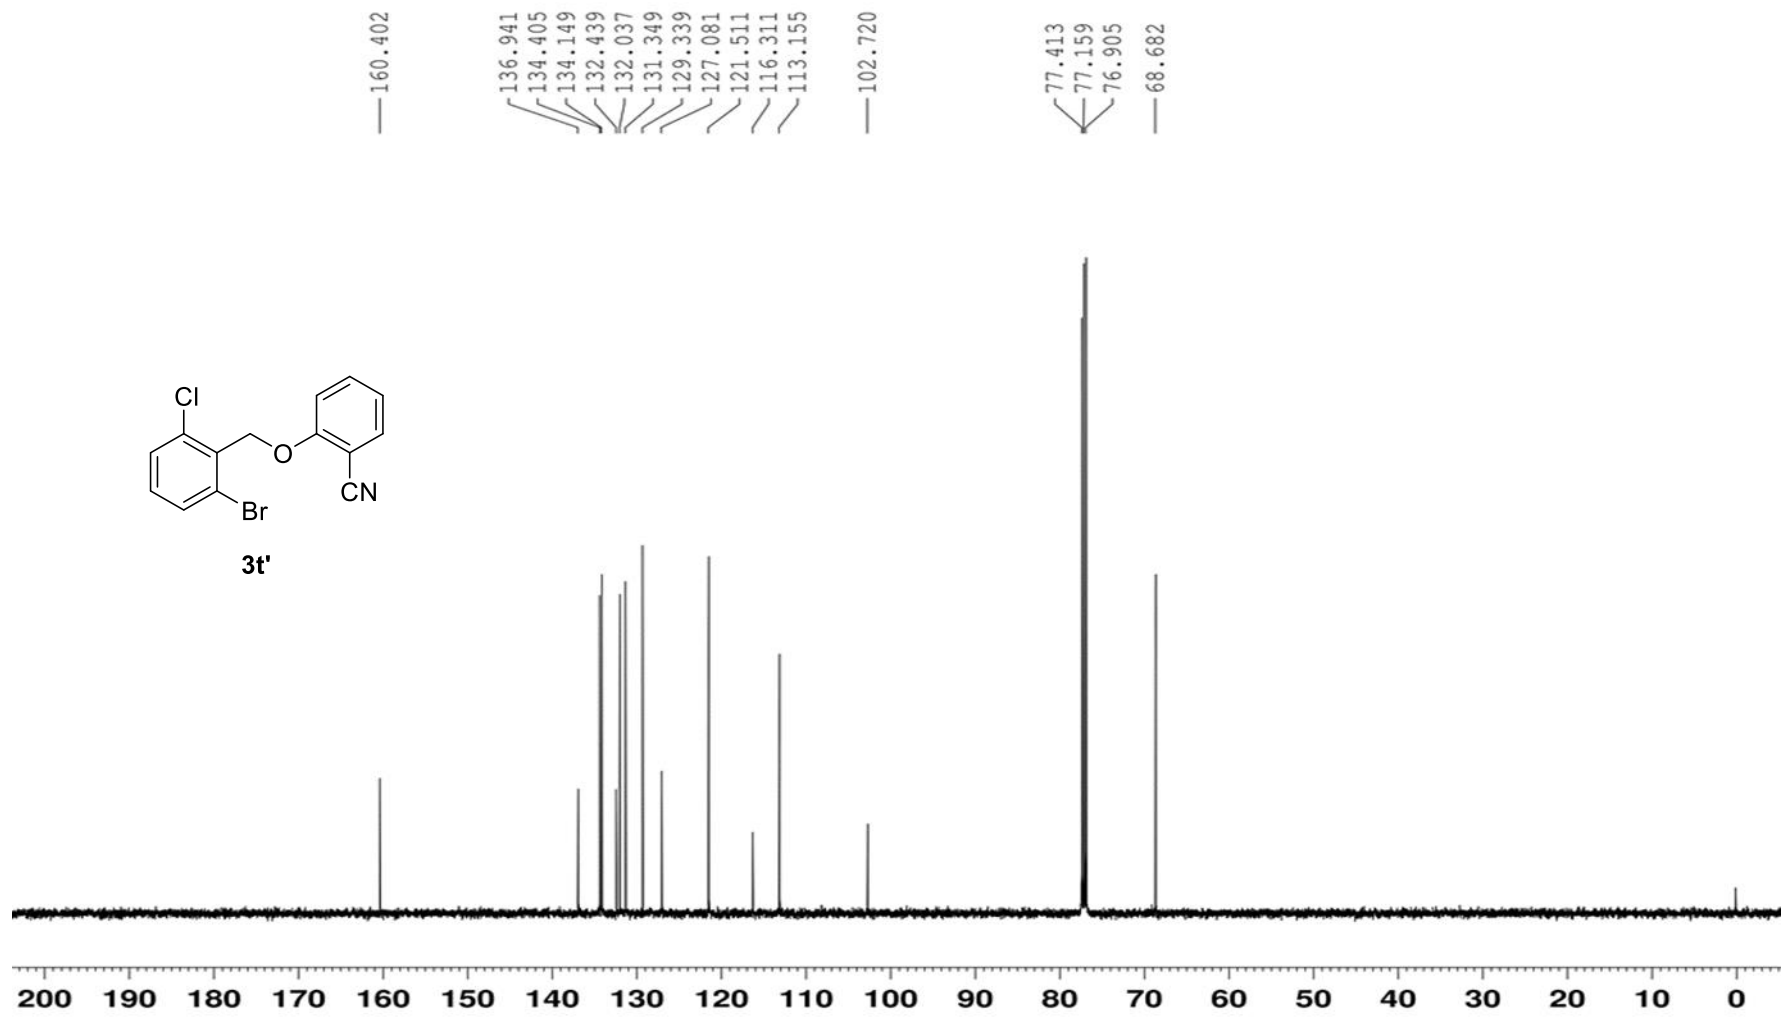

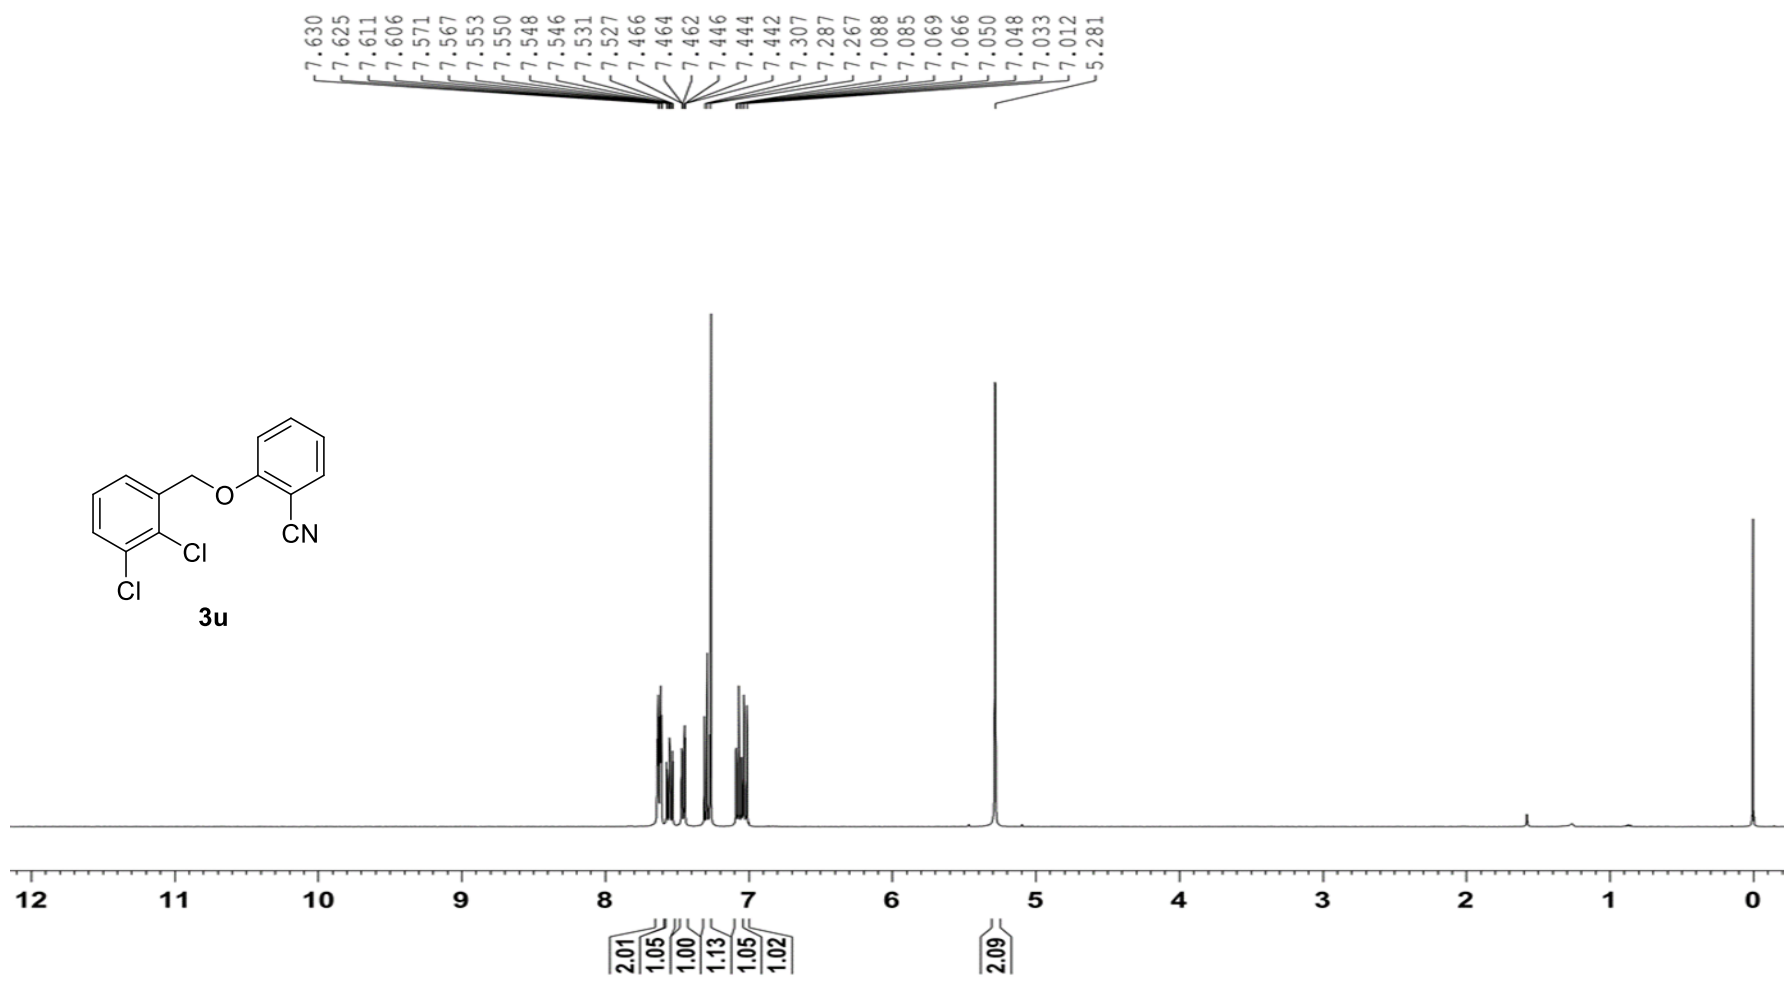



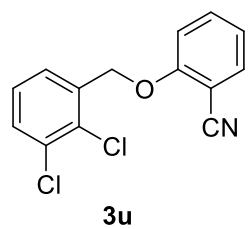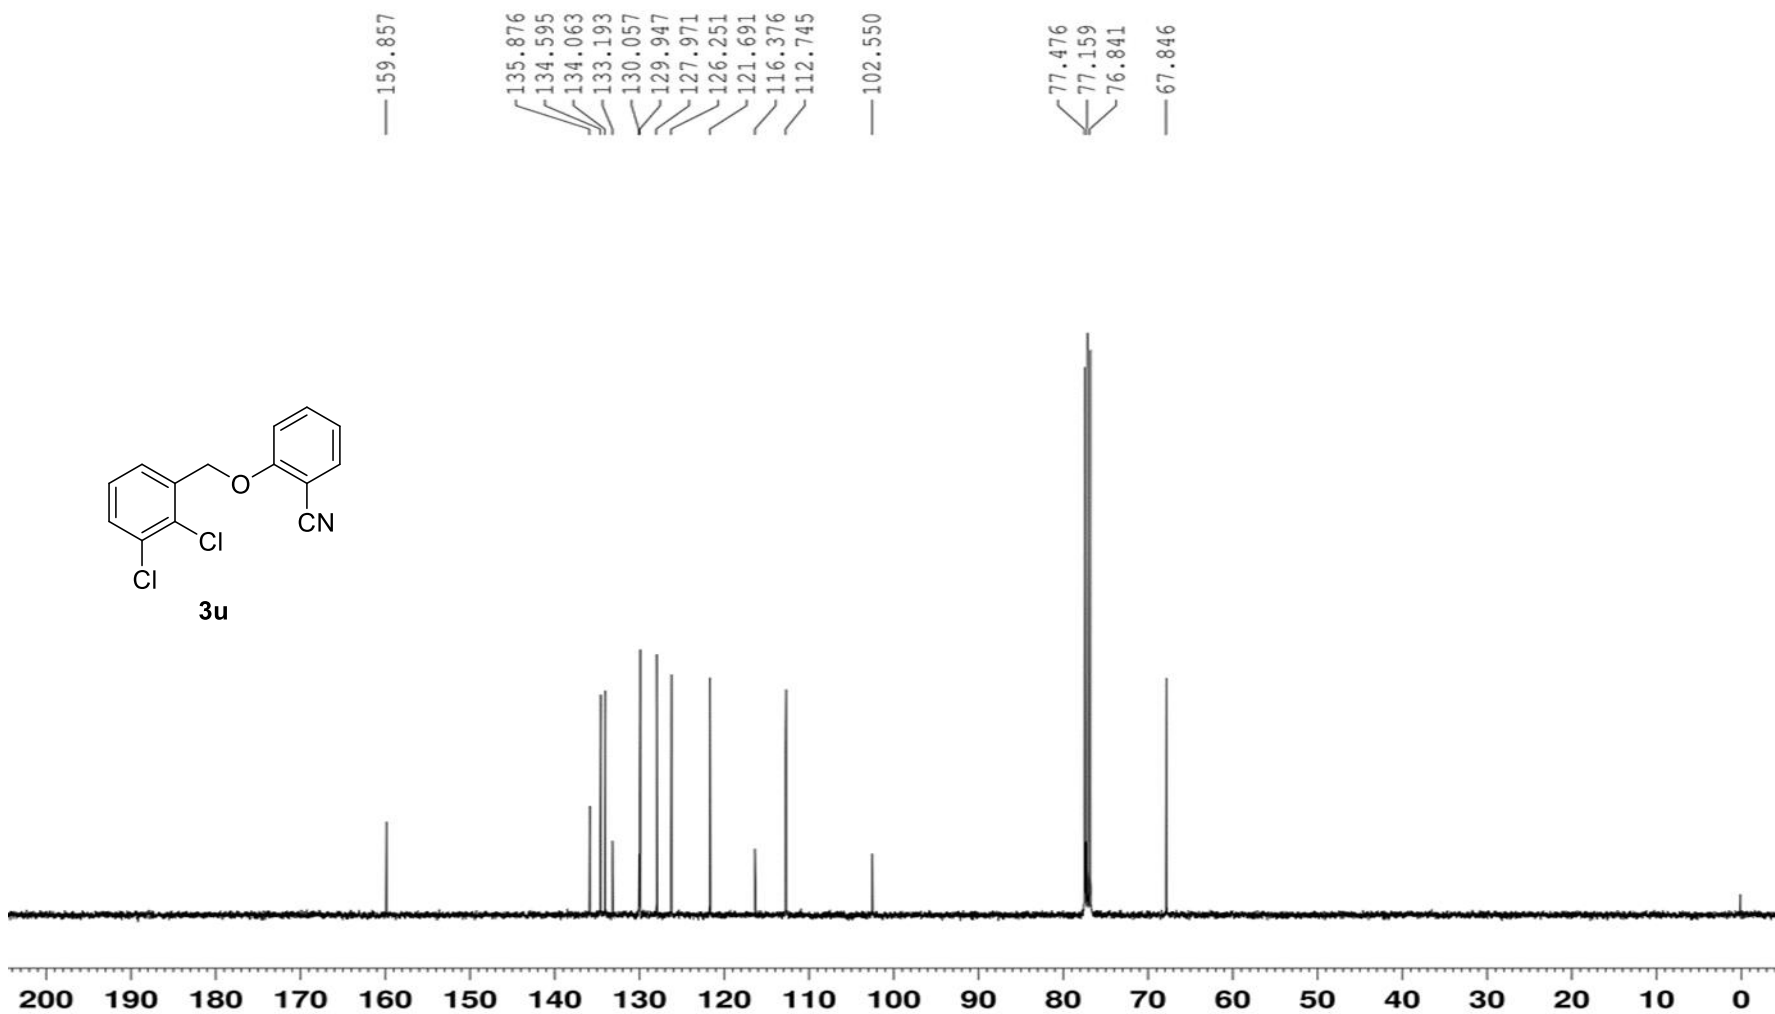

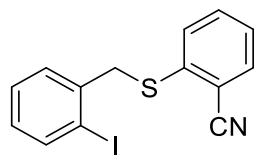

5a

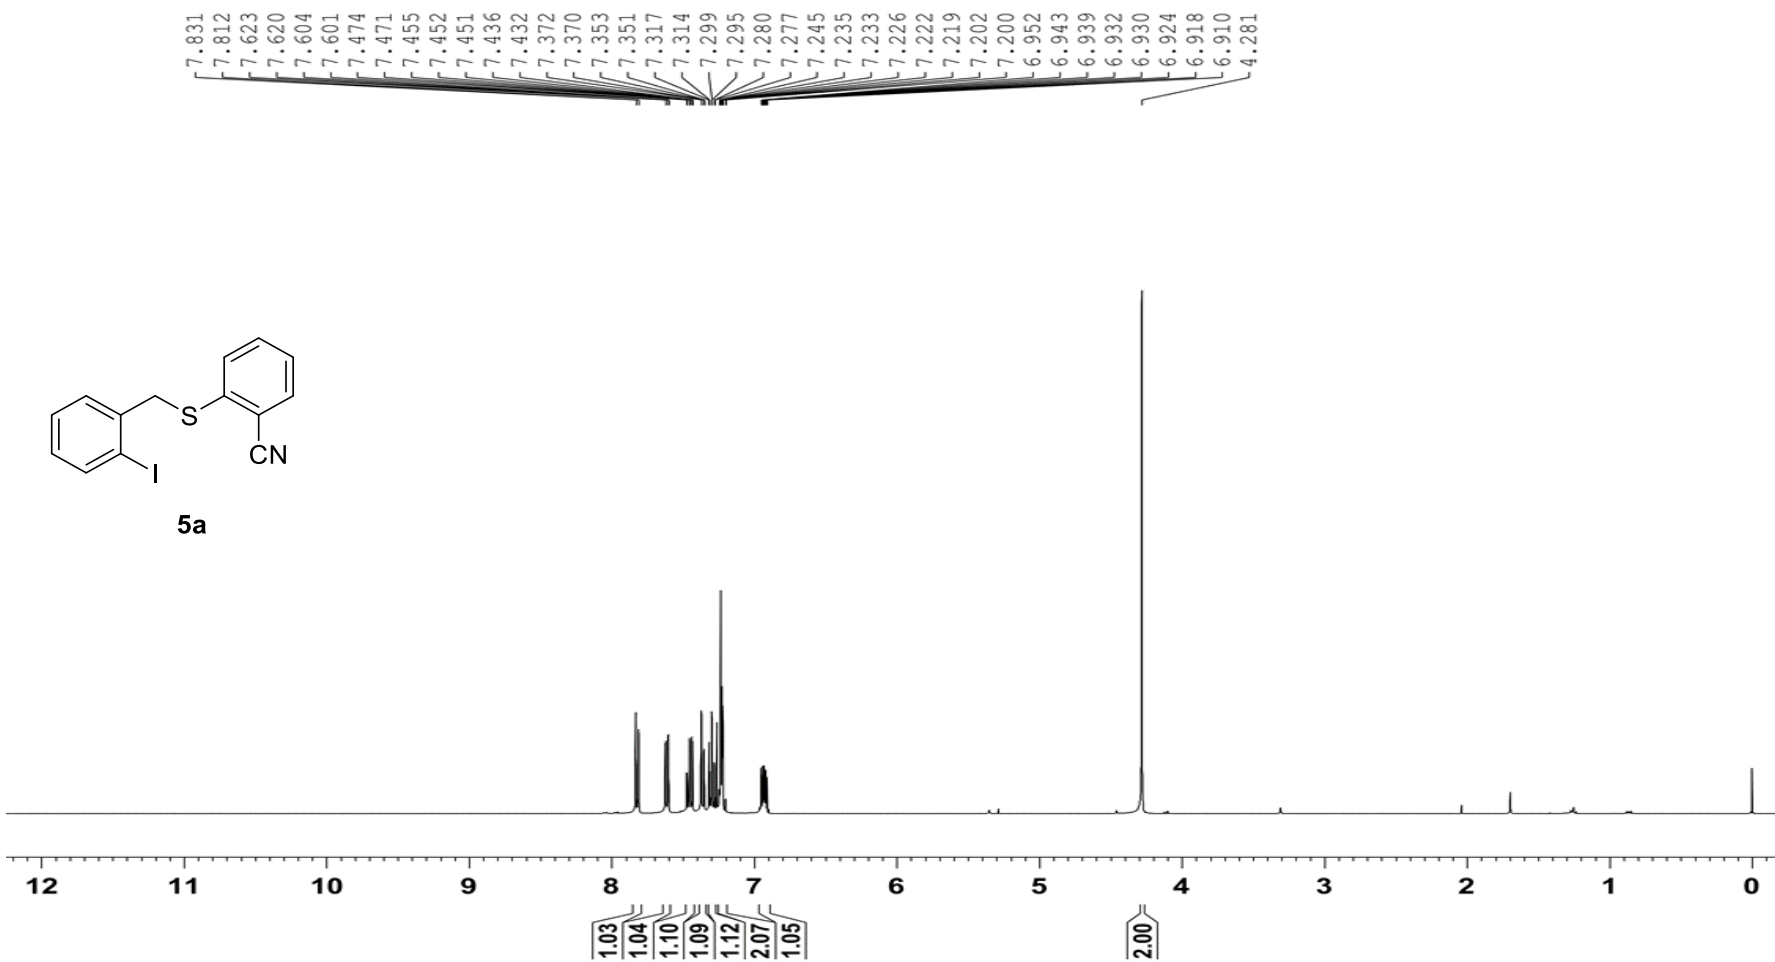

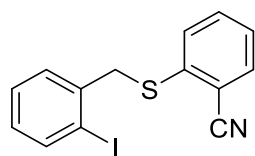

5a

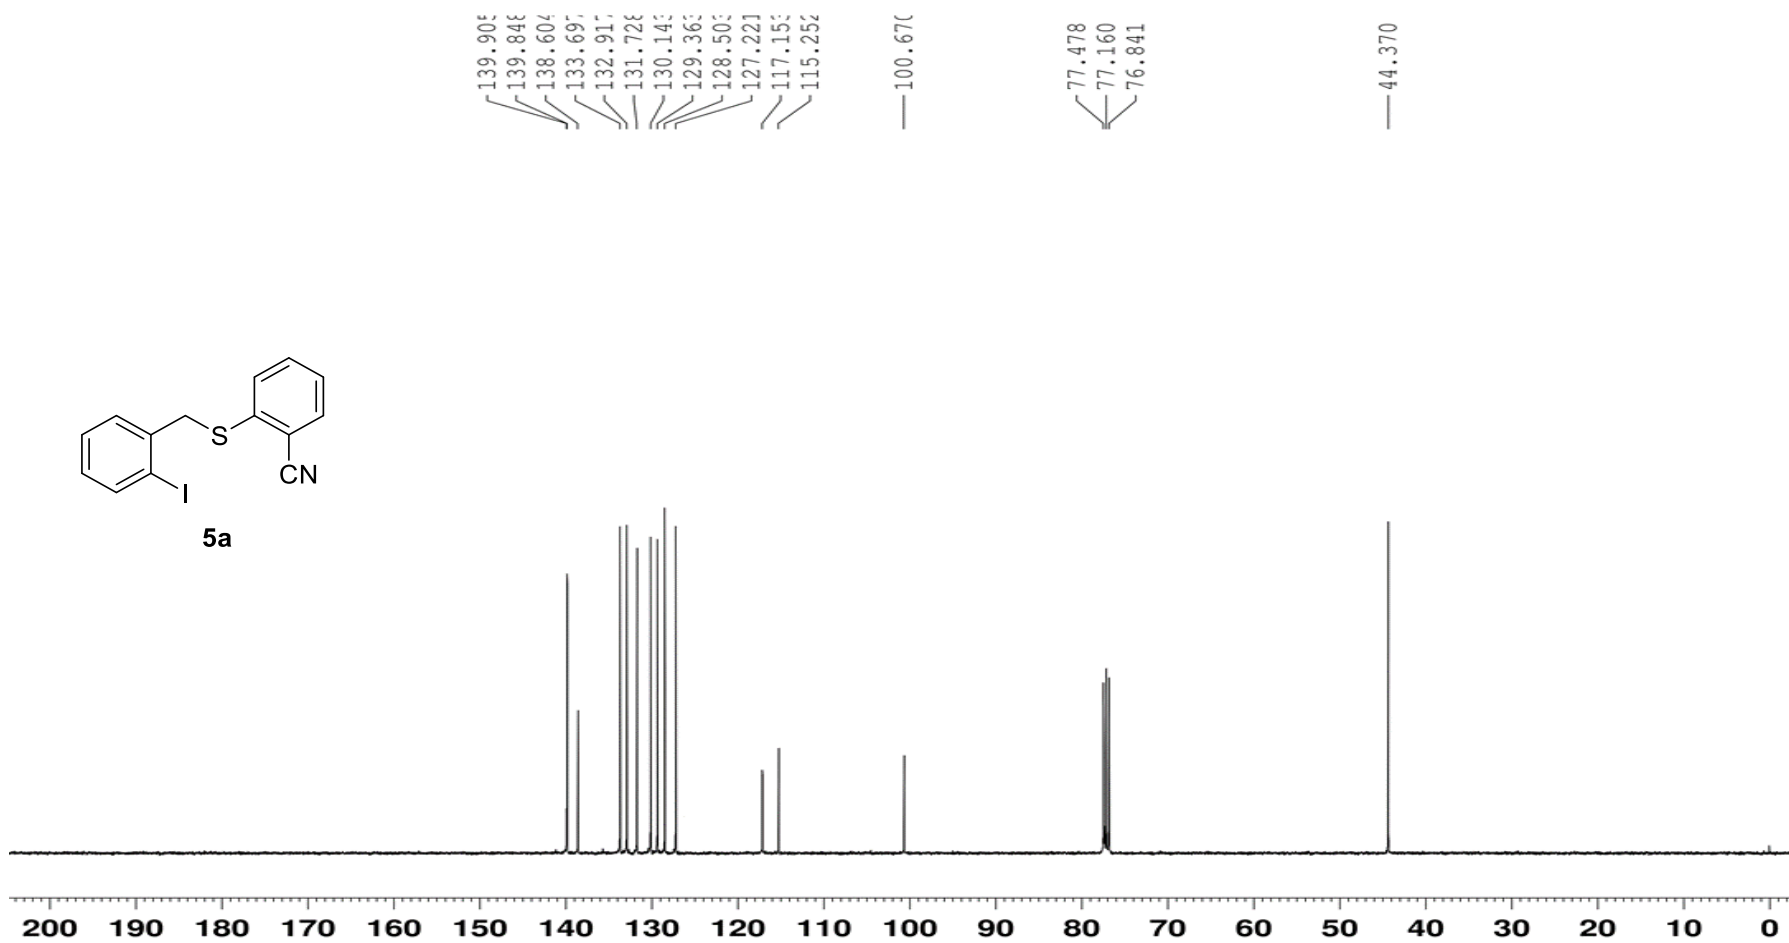

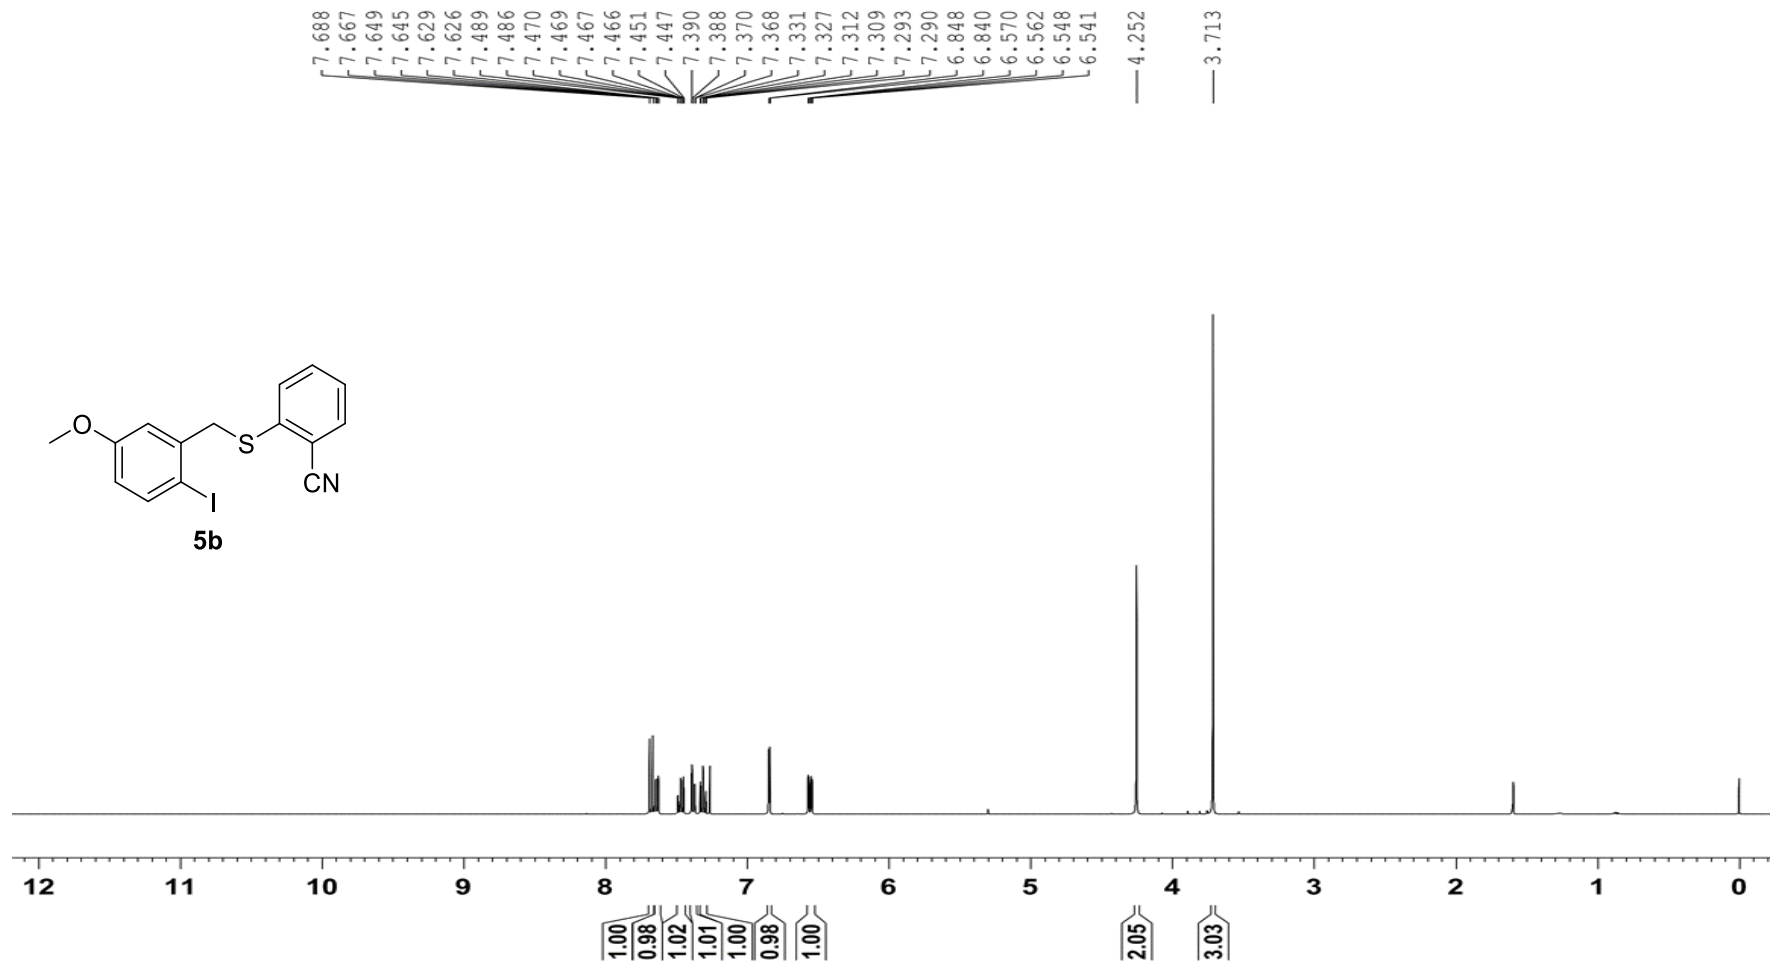

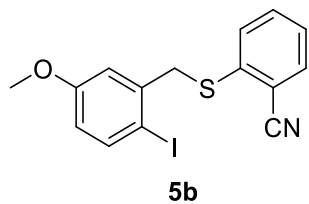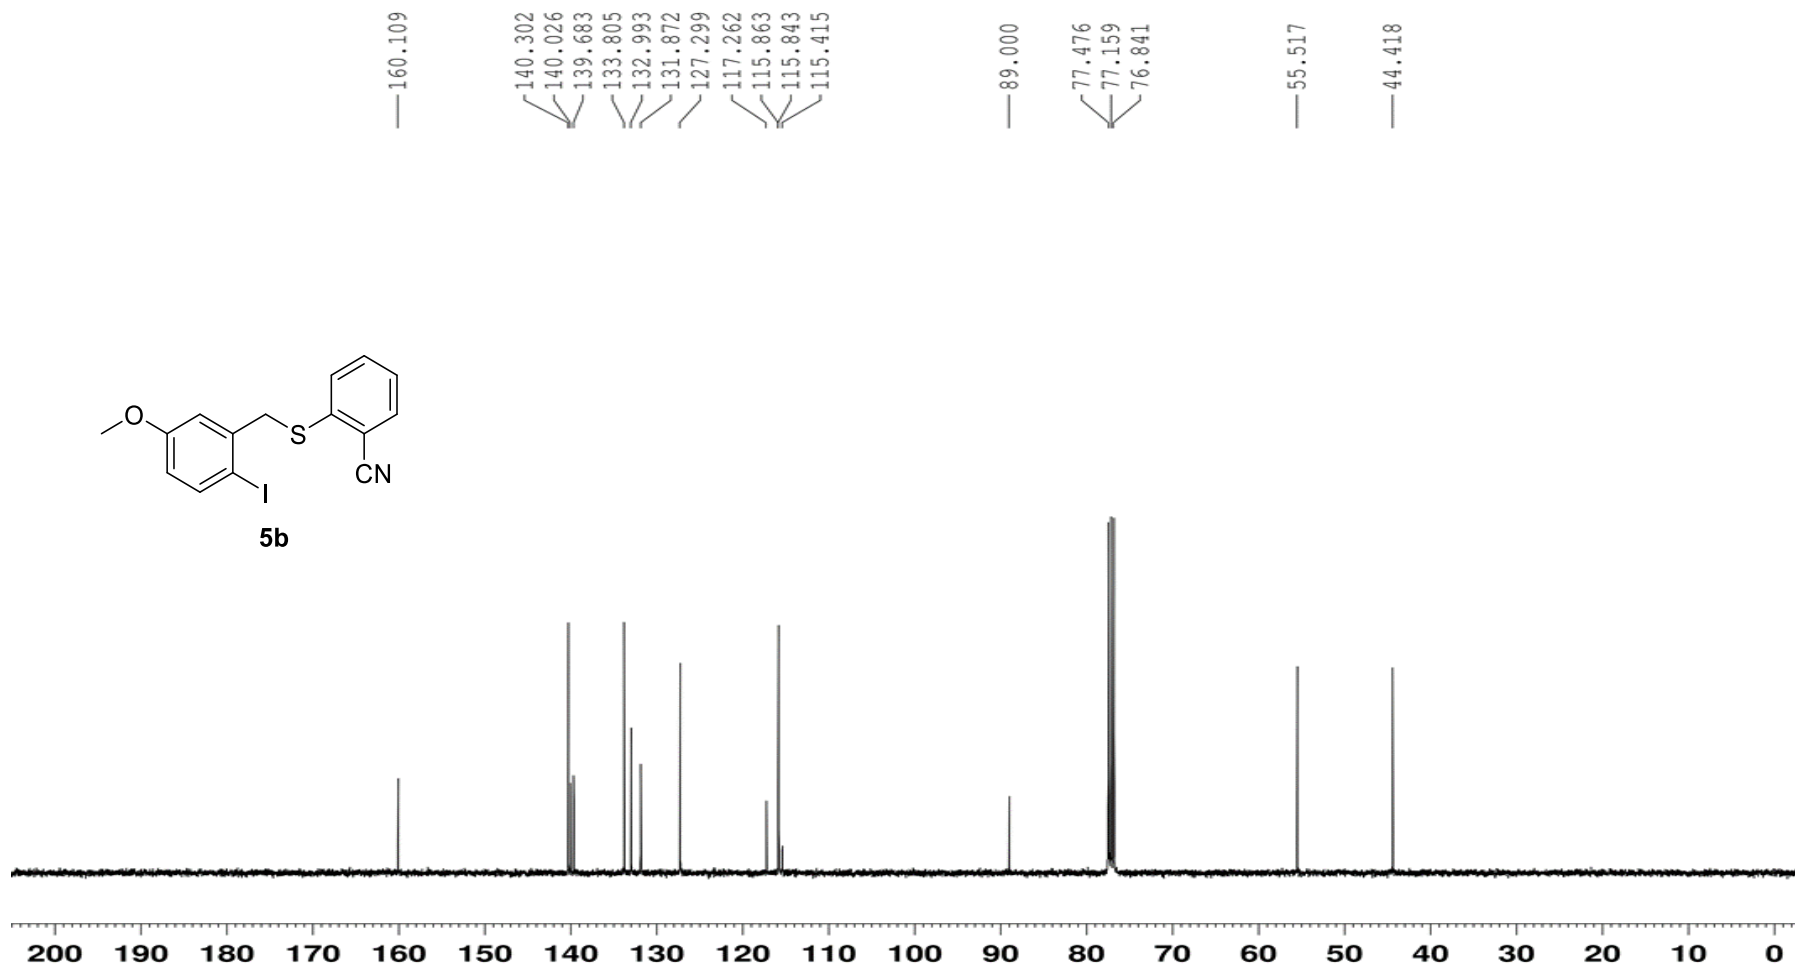

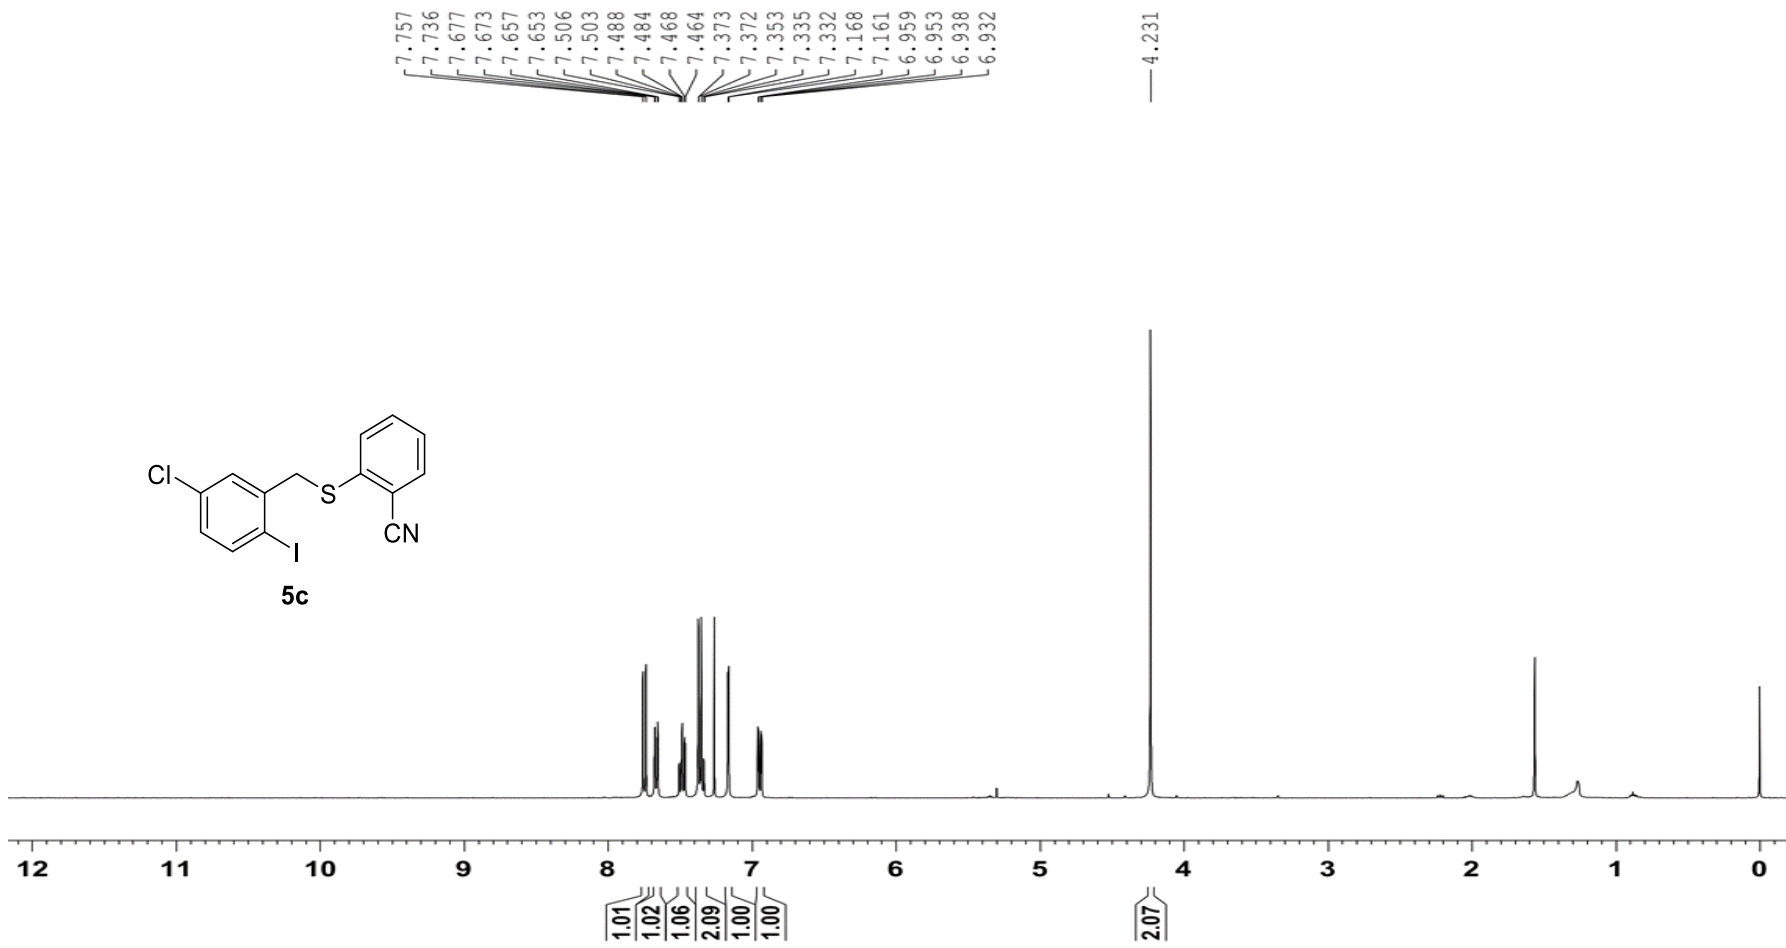

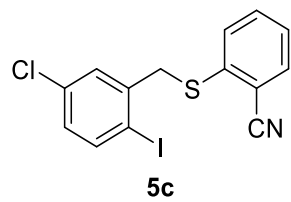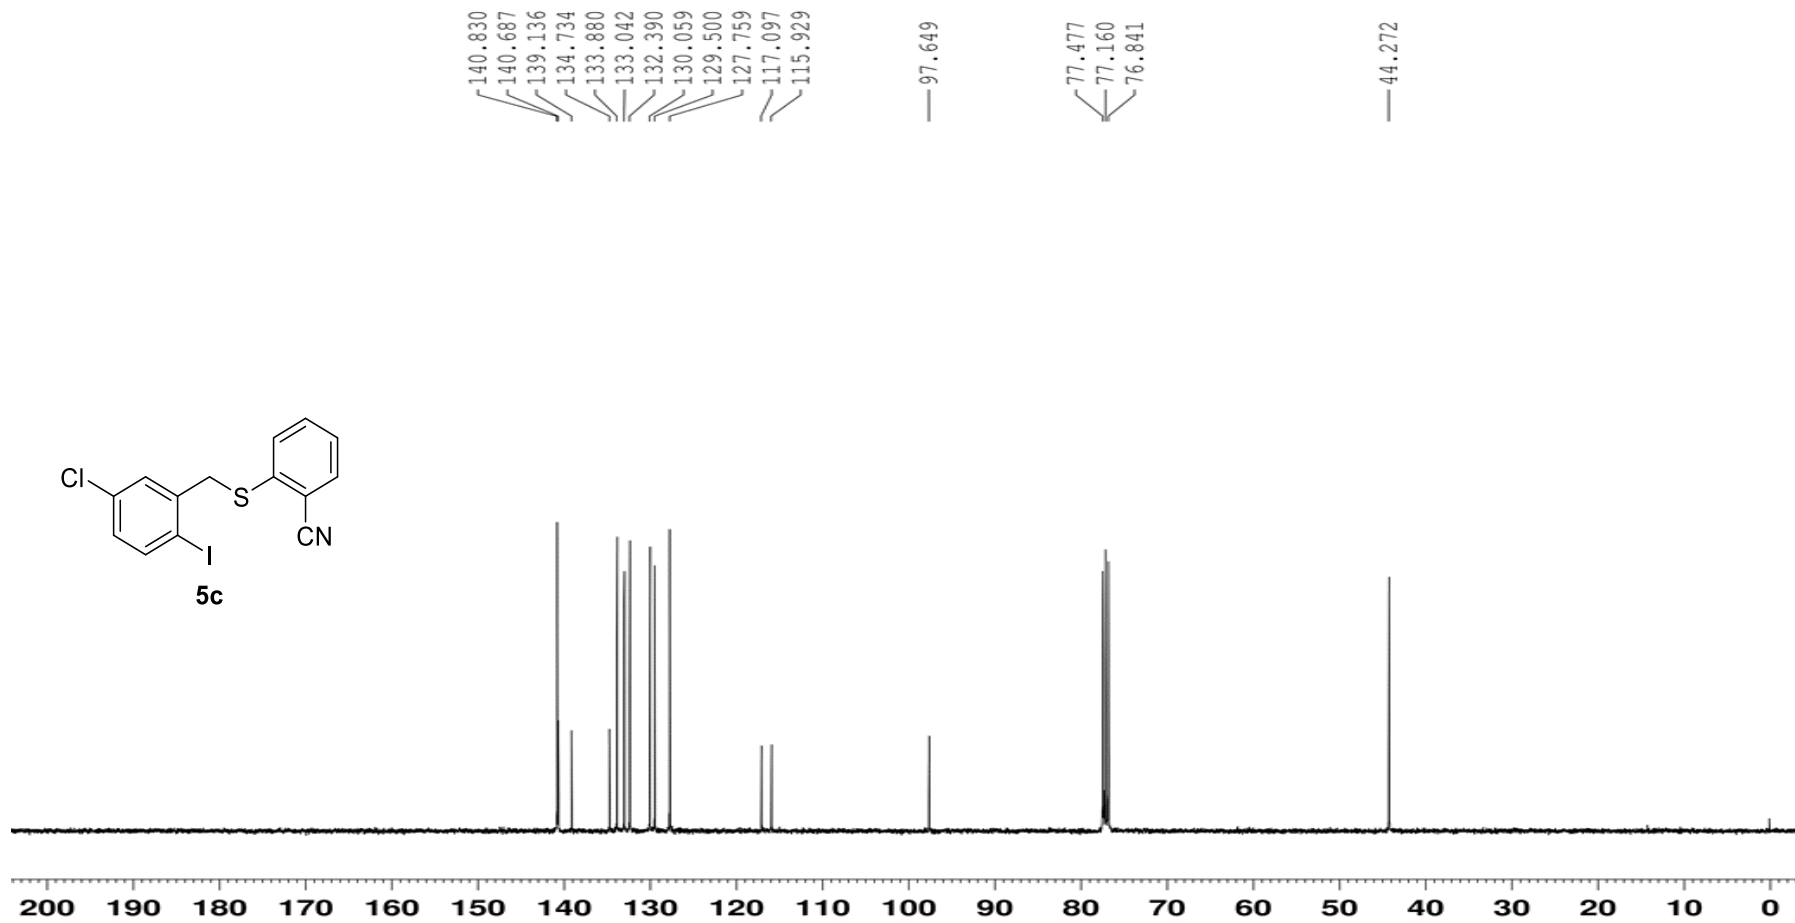

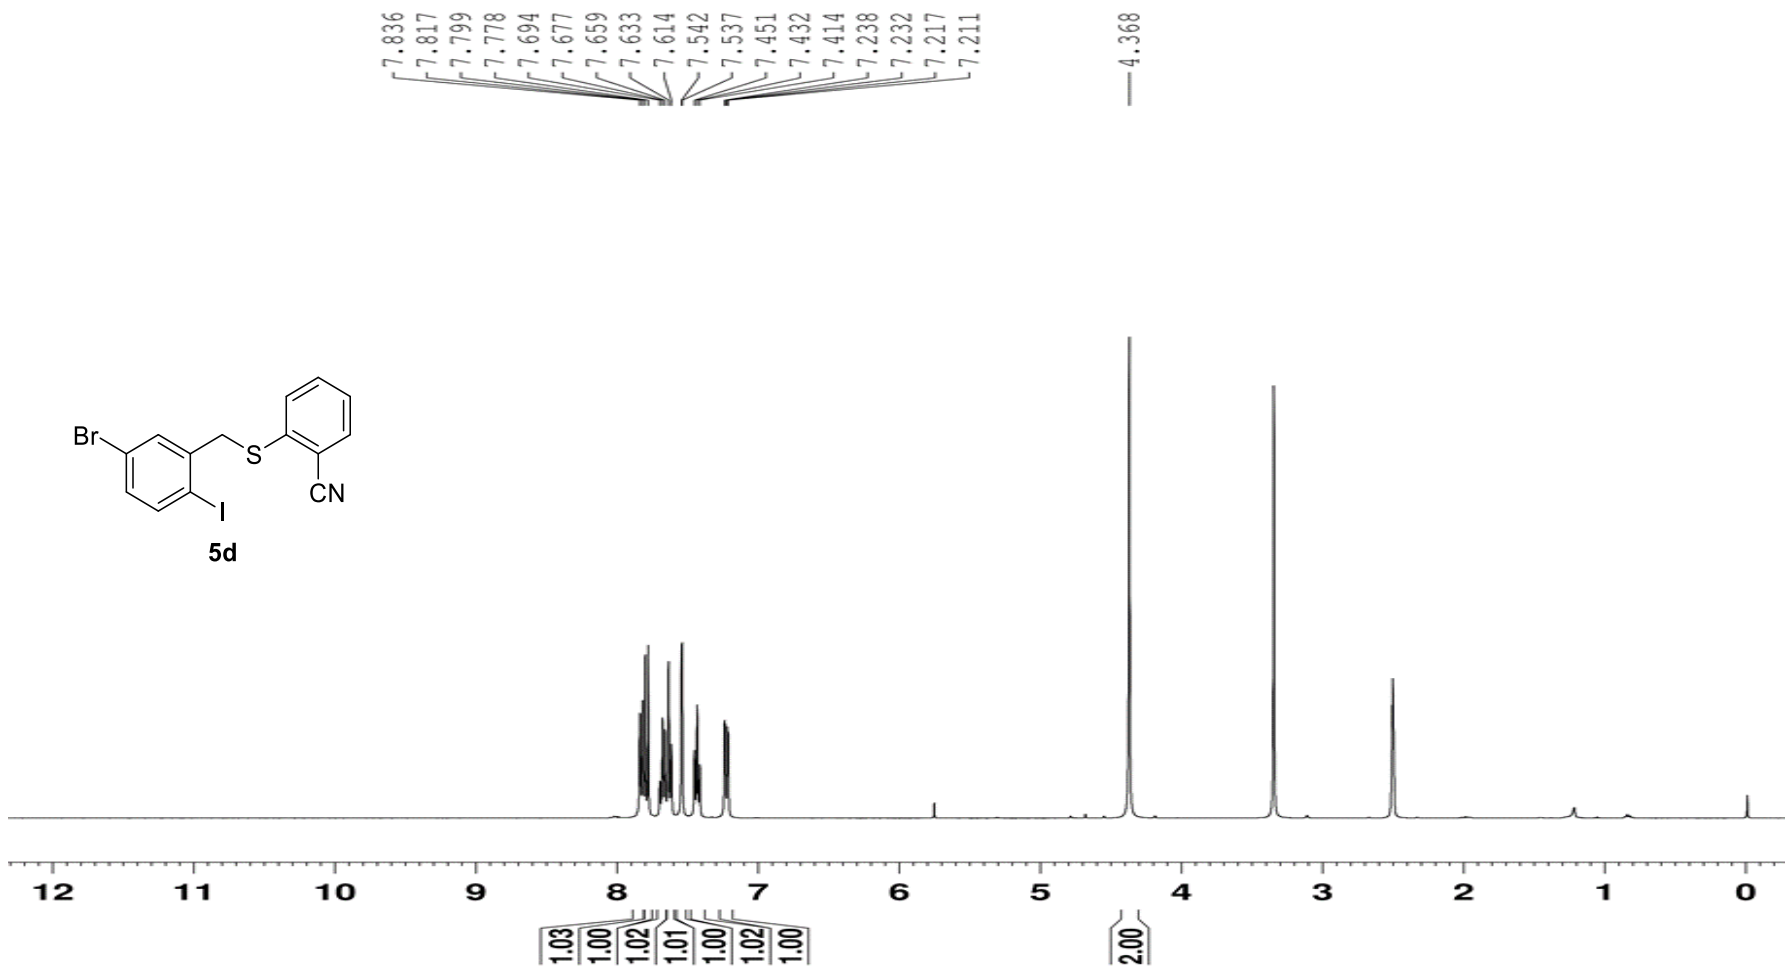



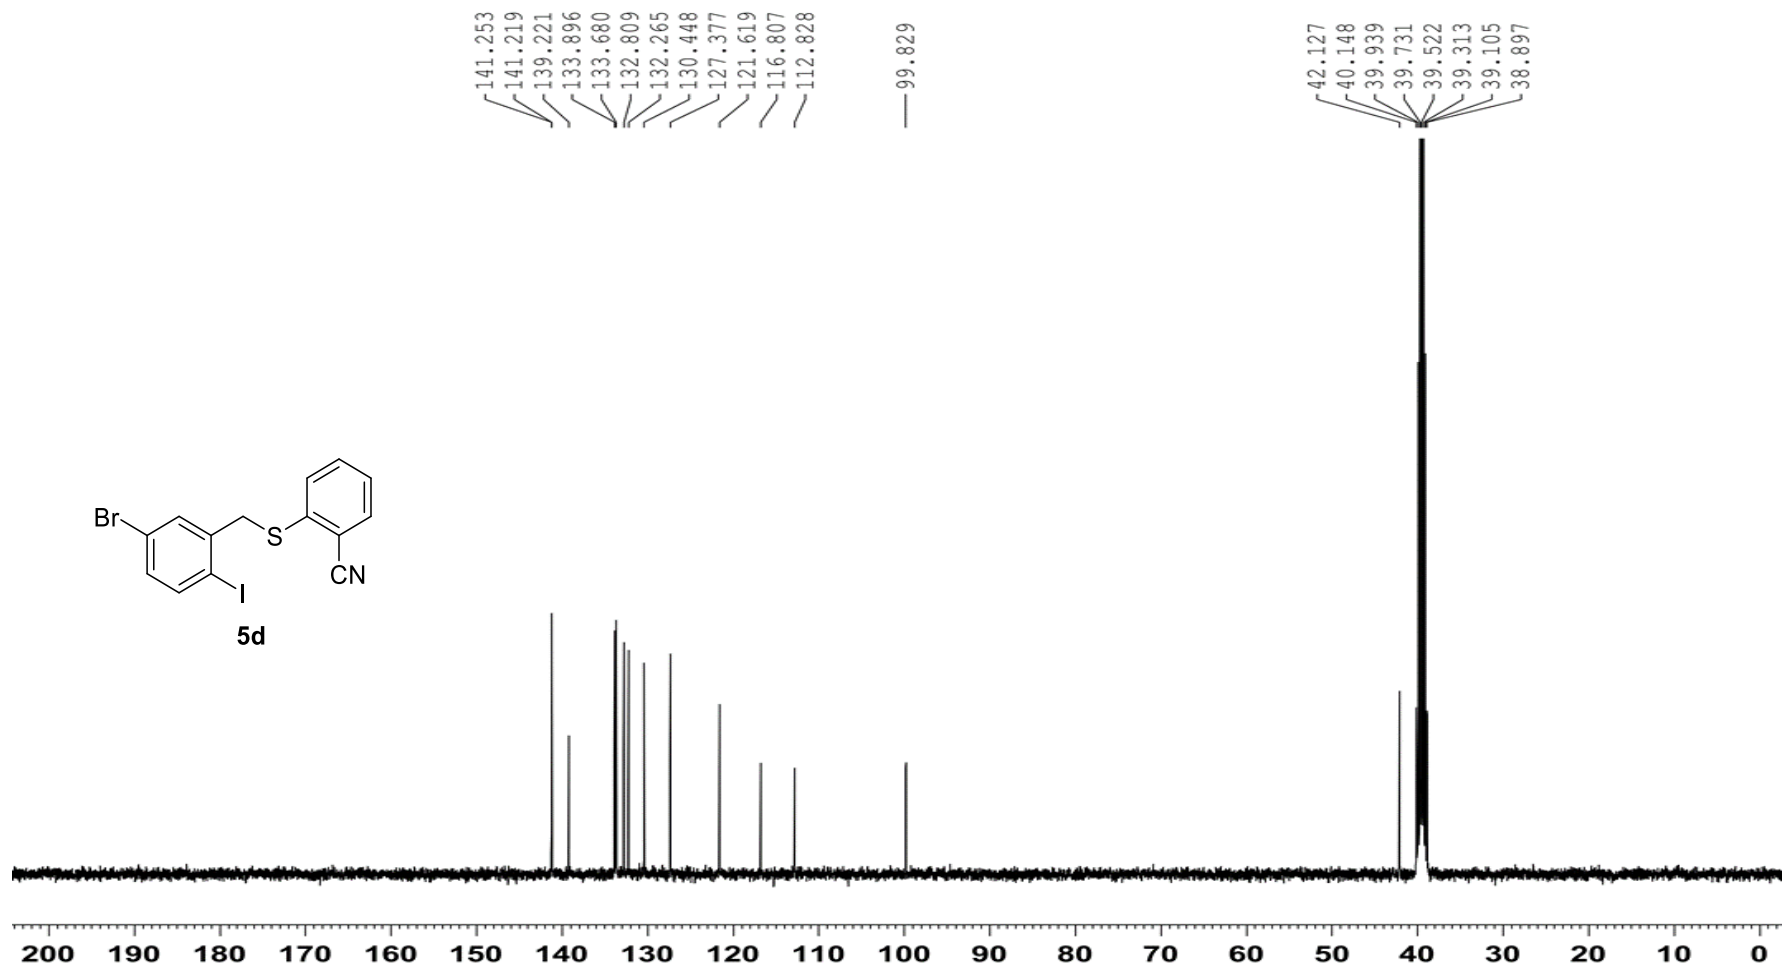

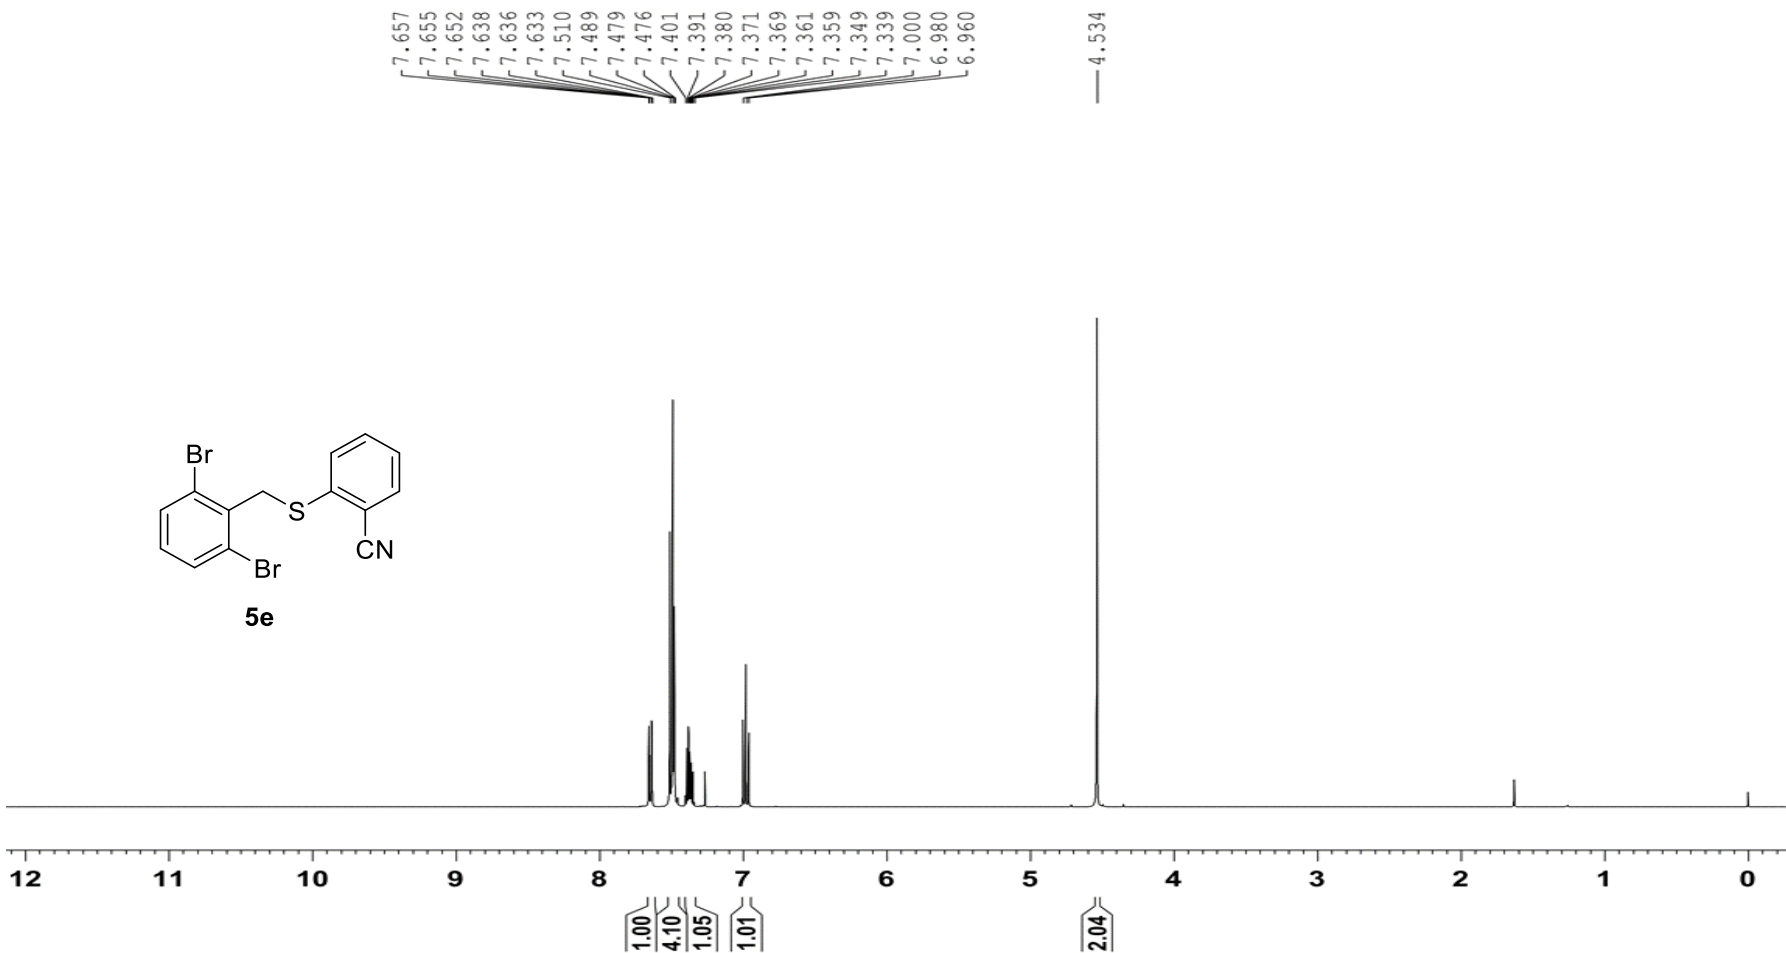

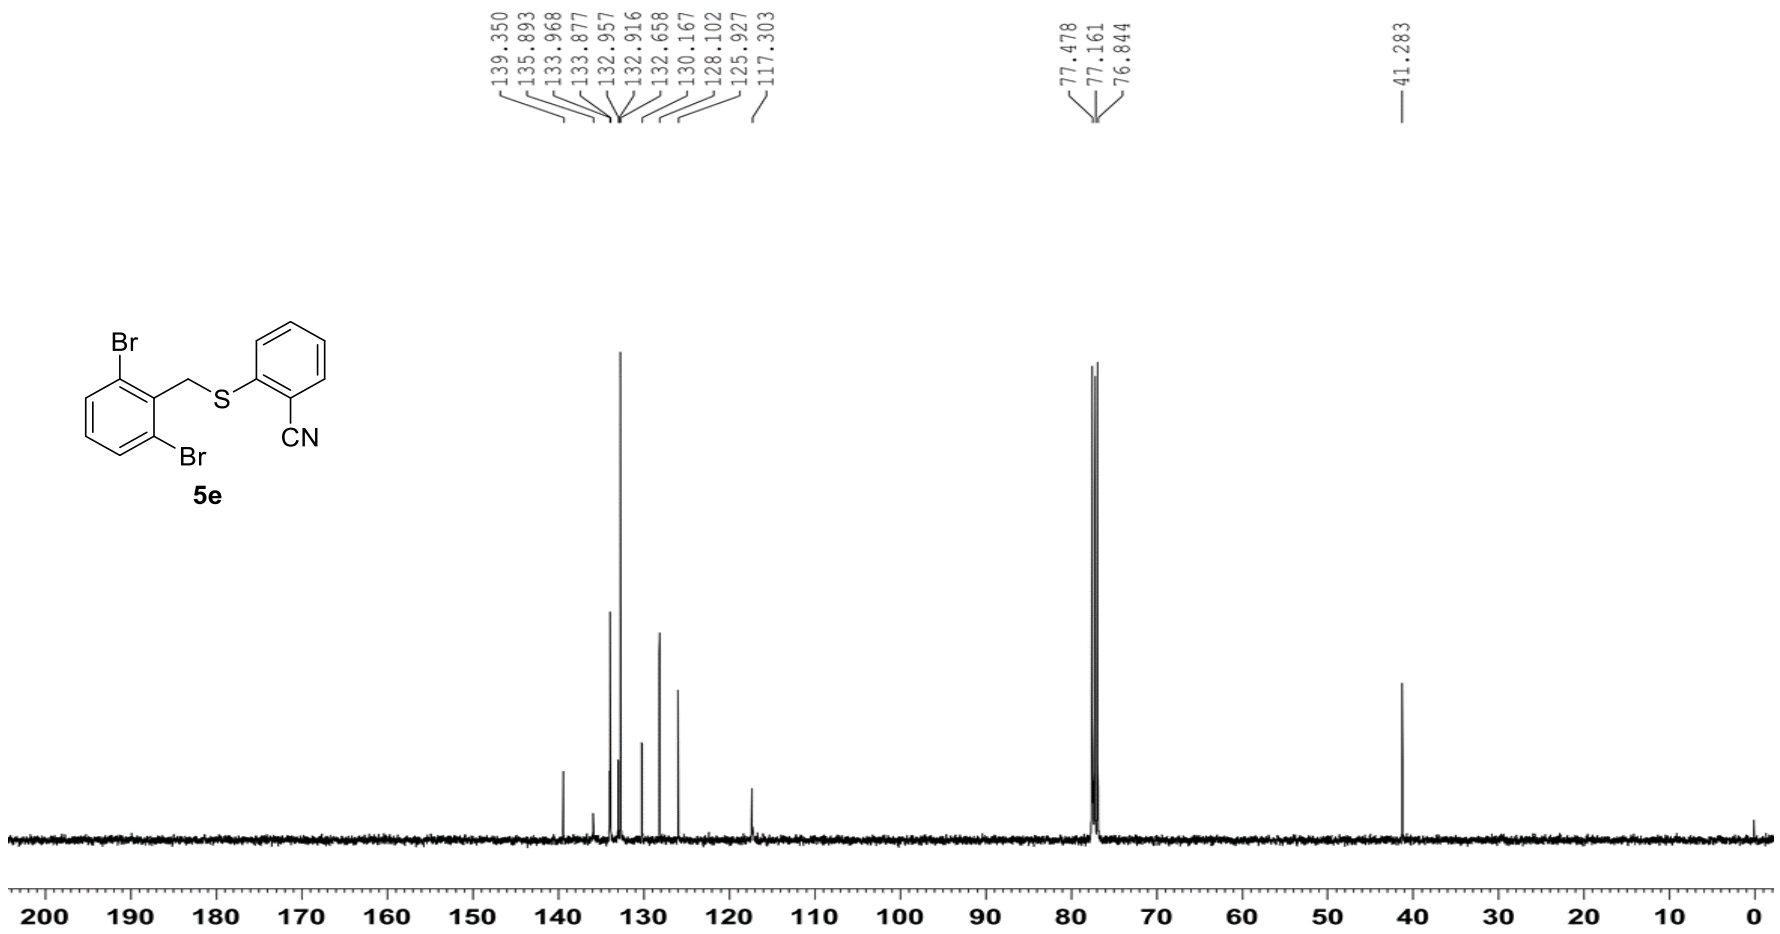

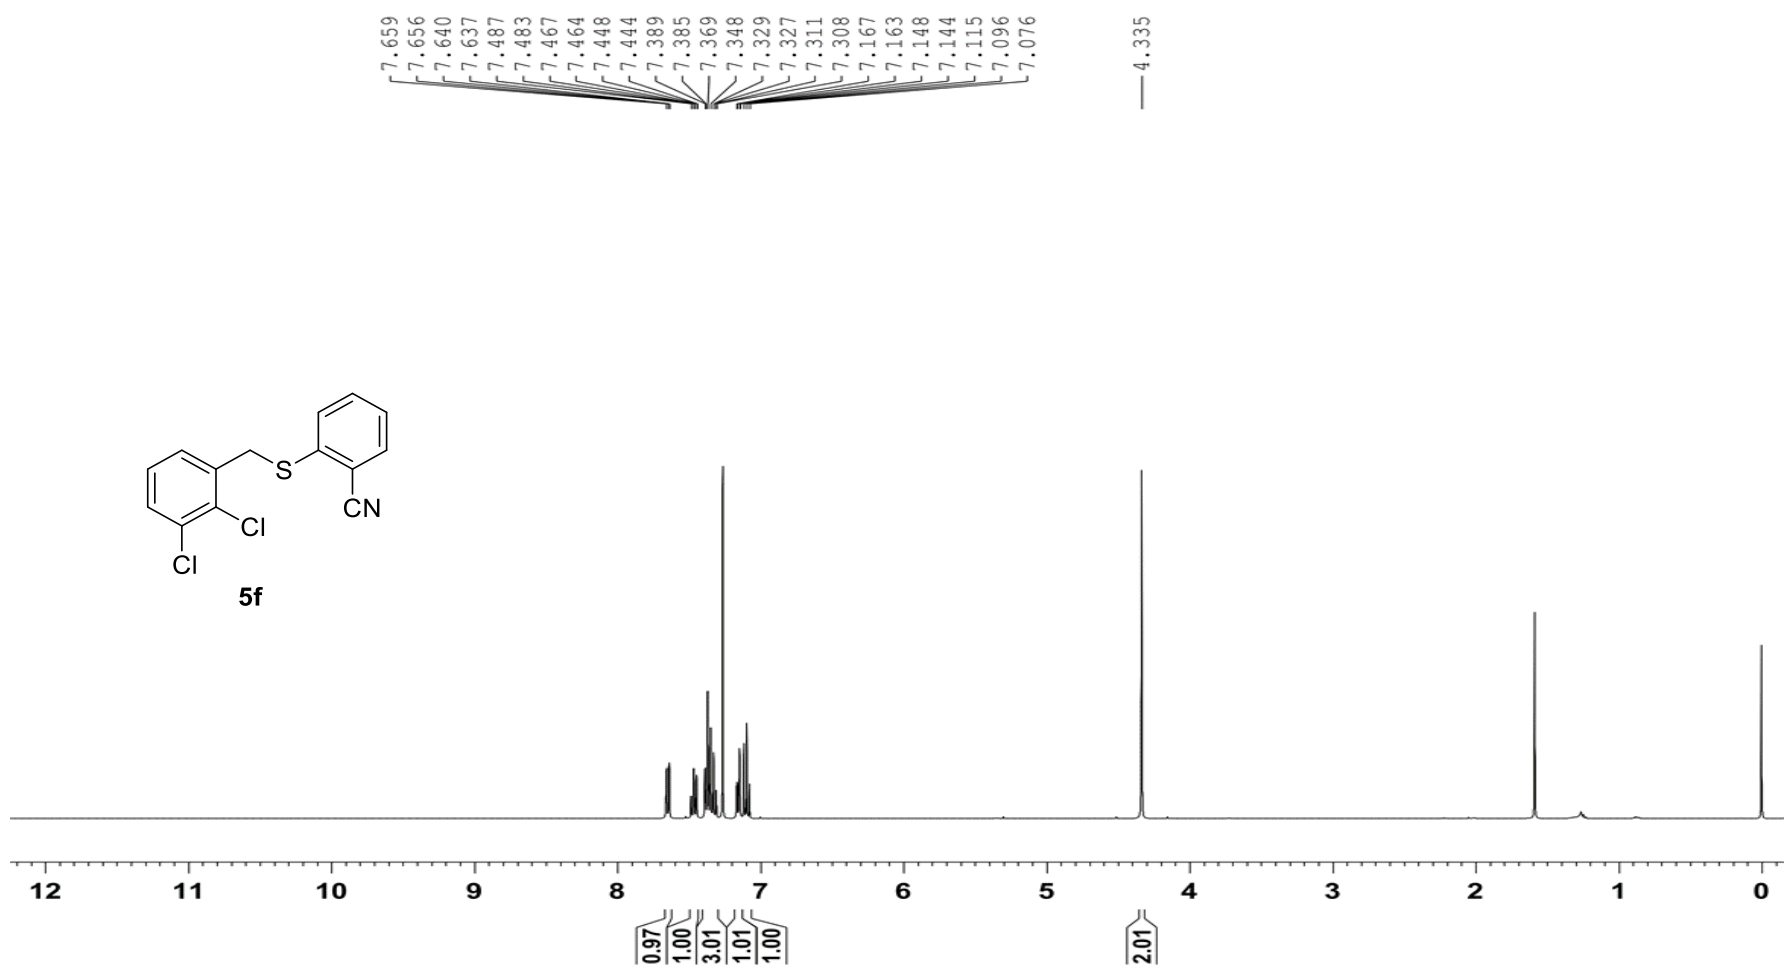

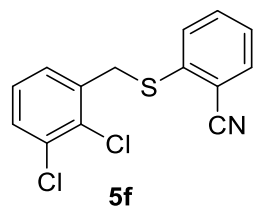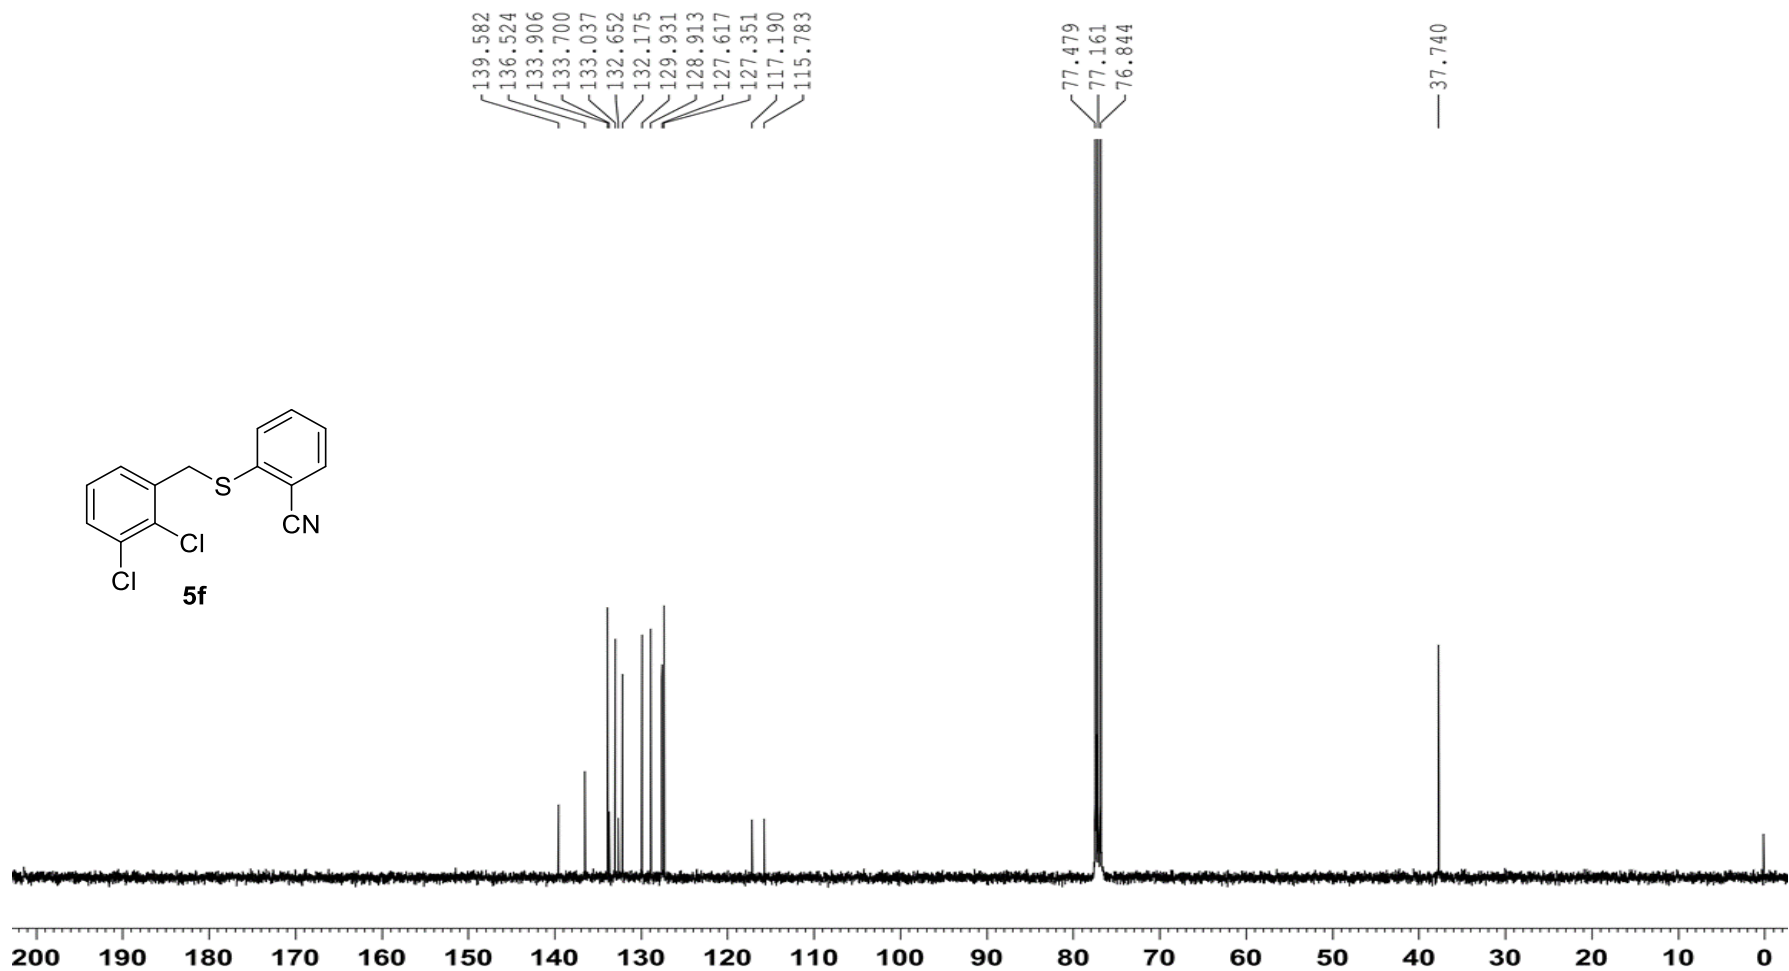

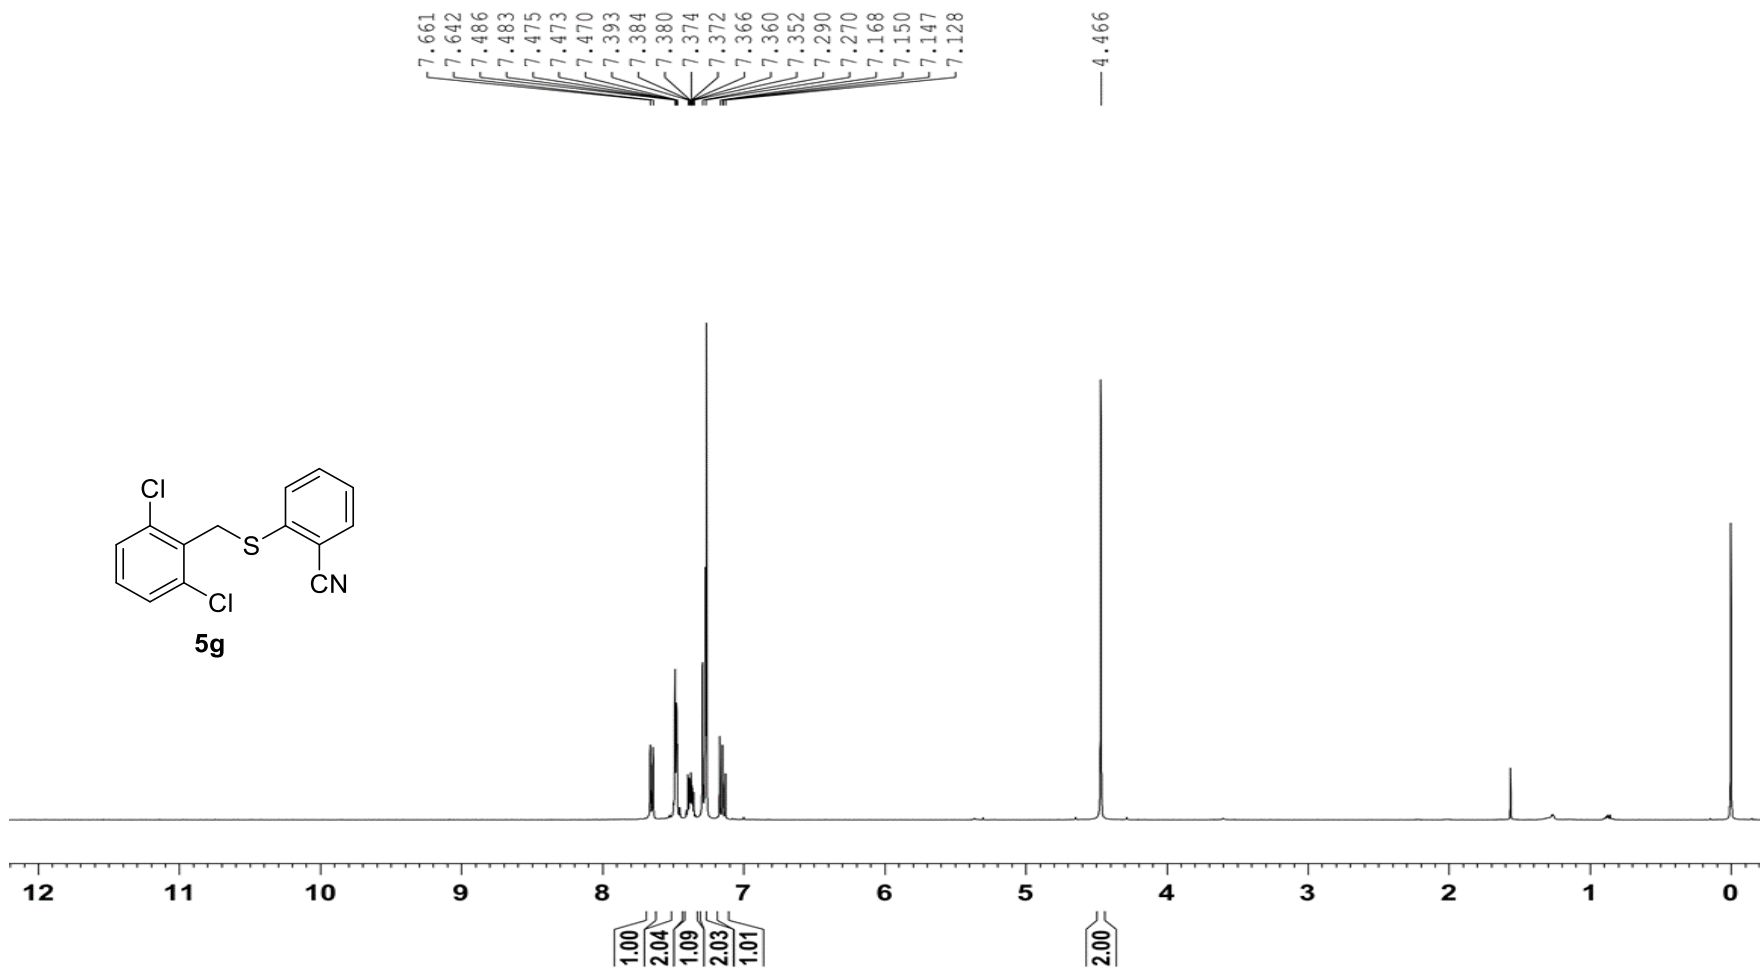

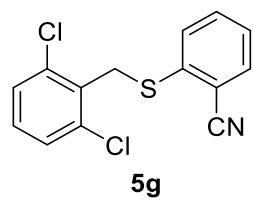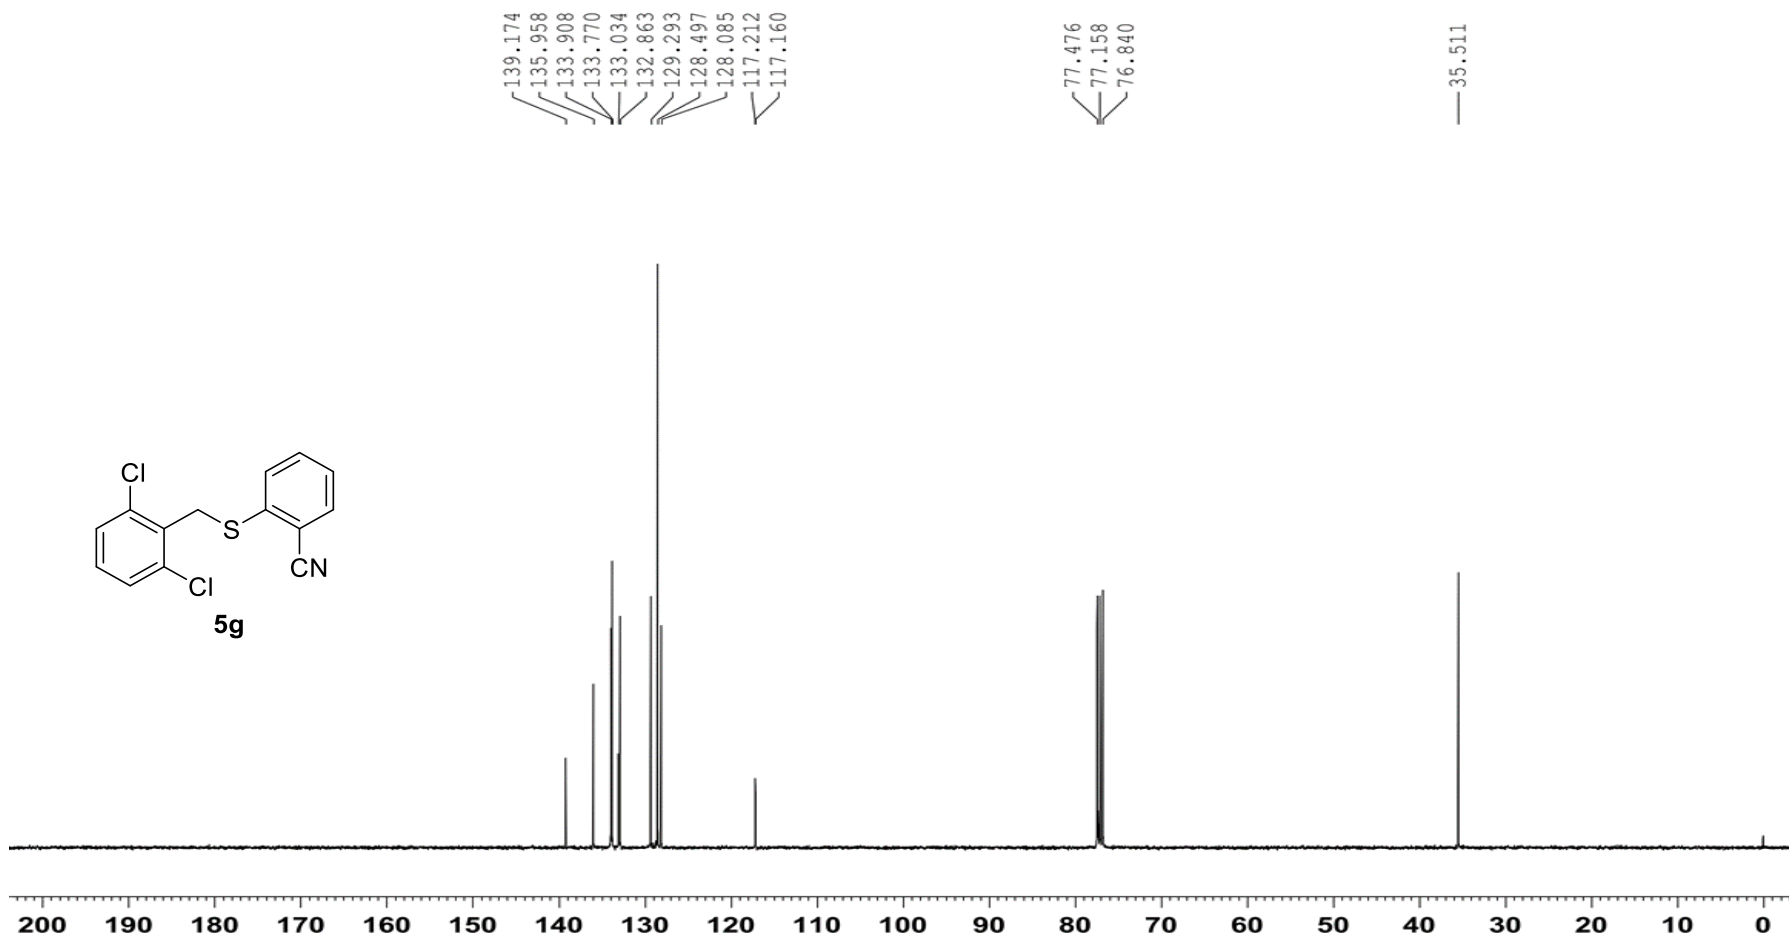

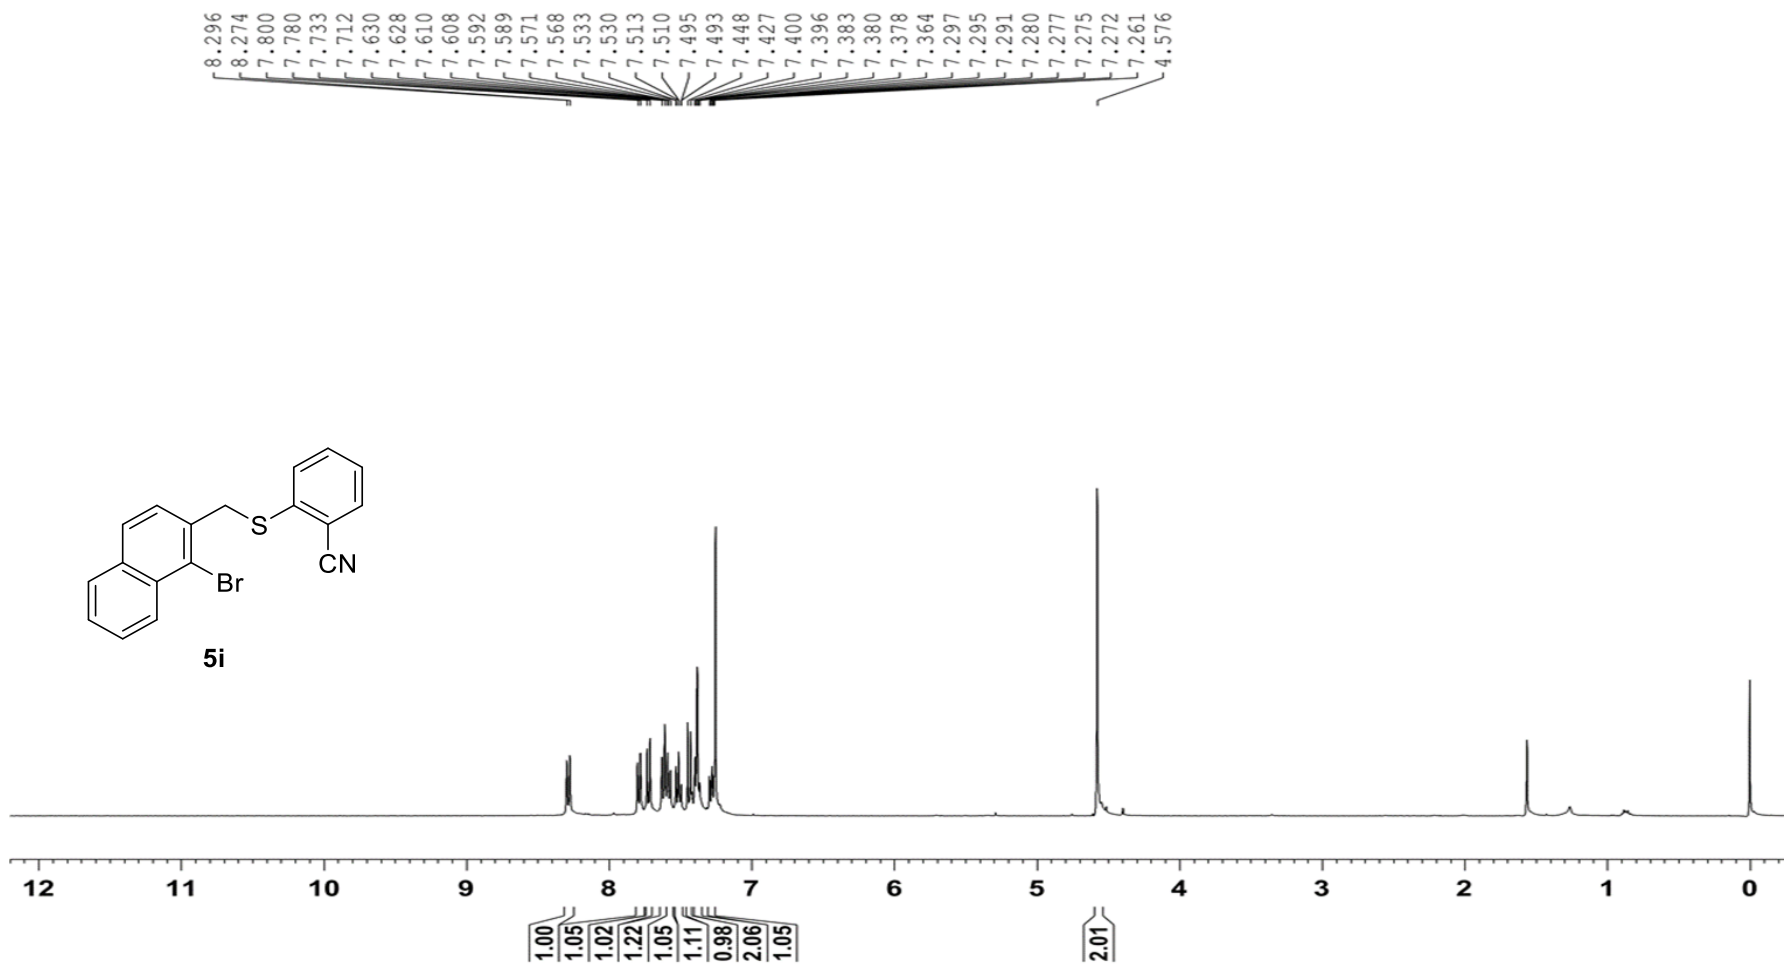



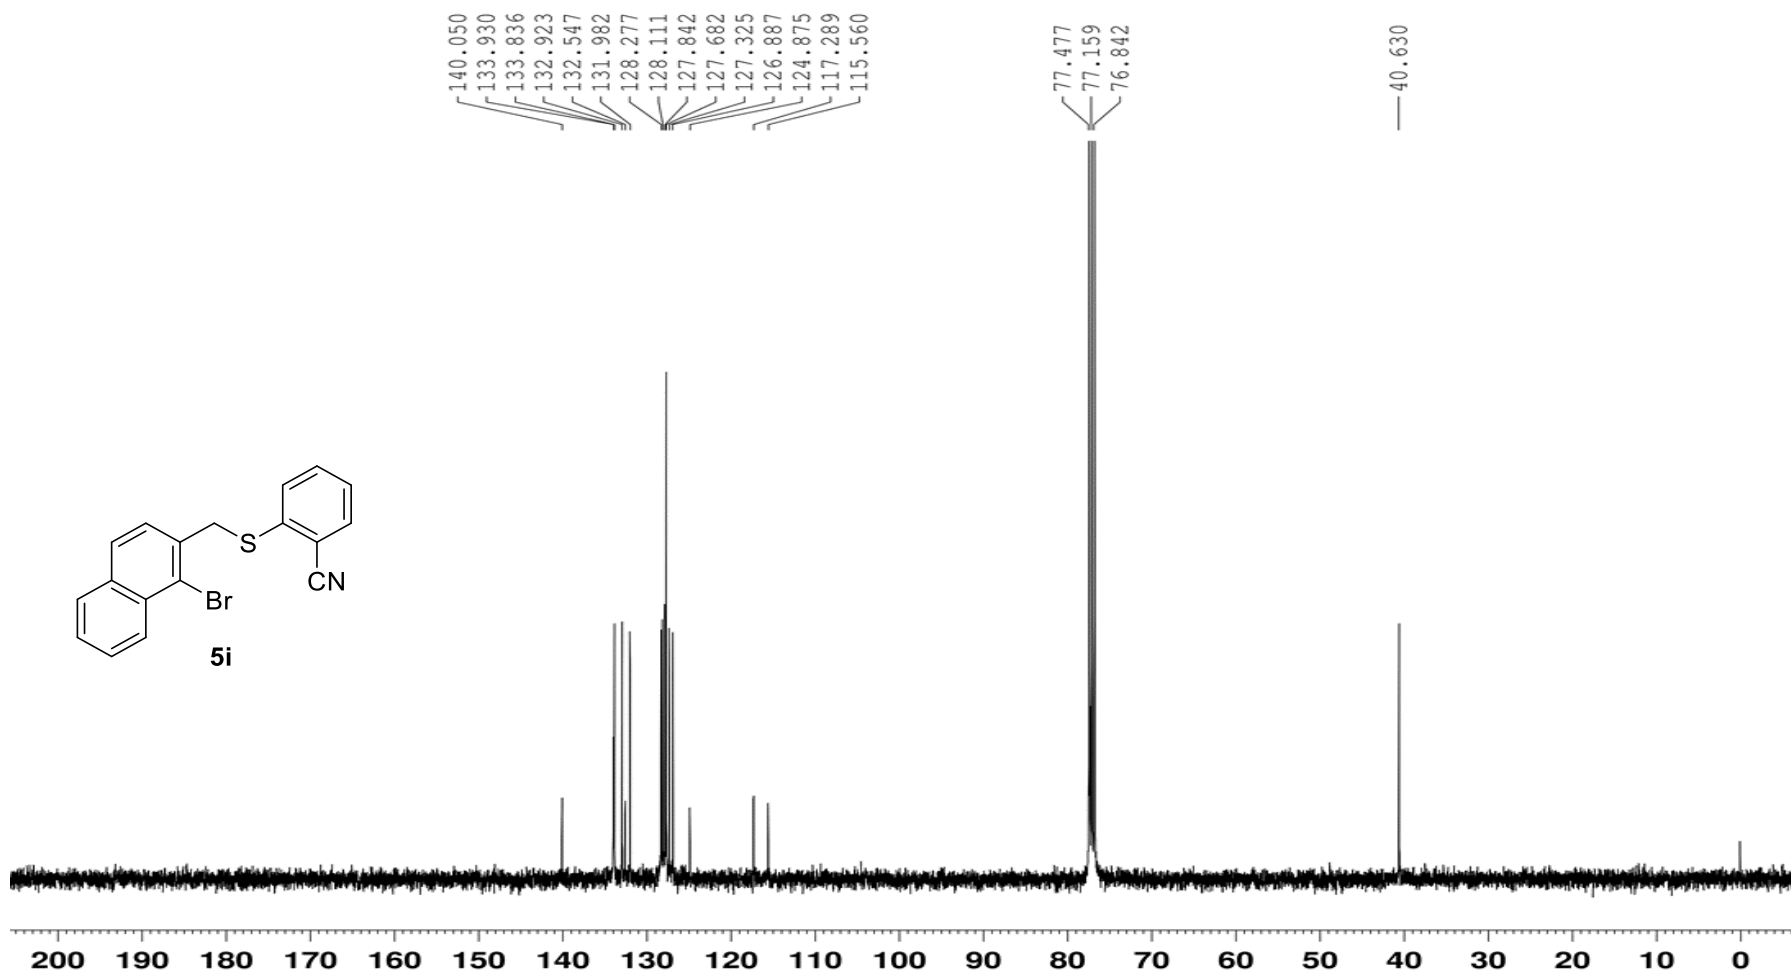

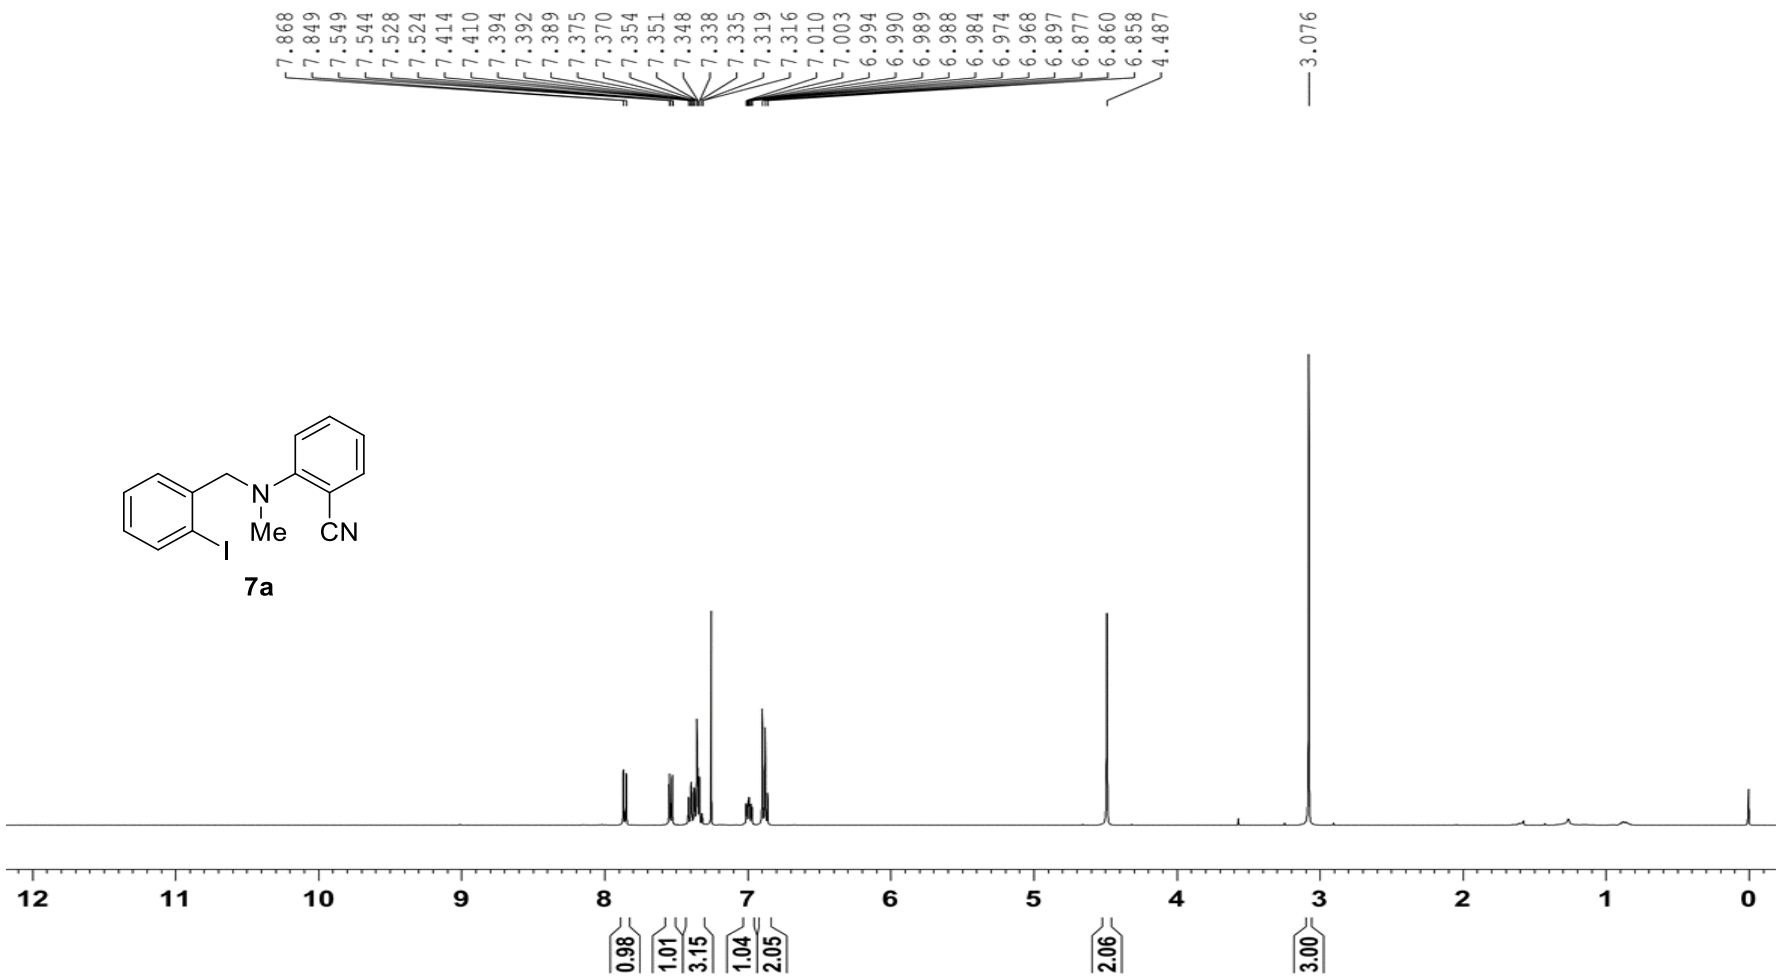

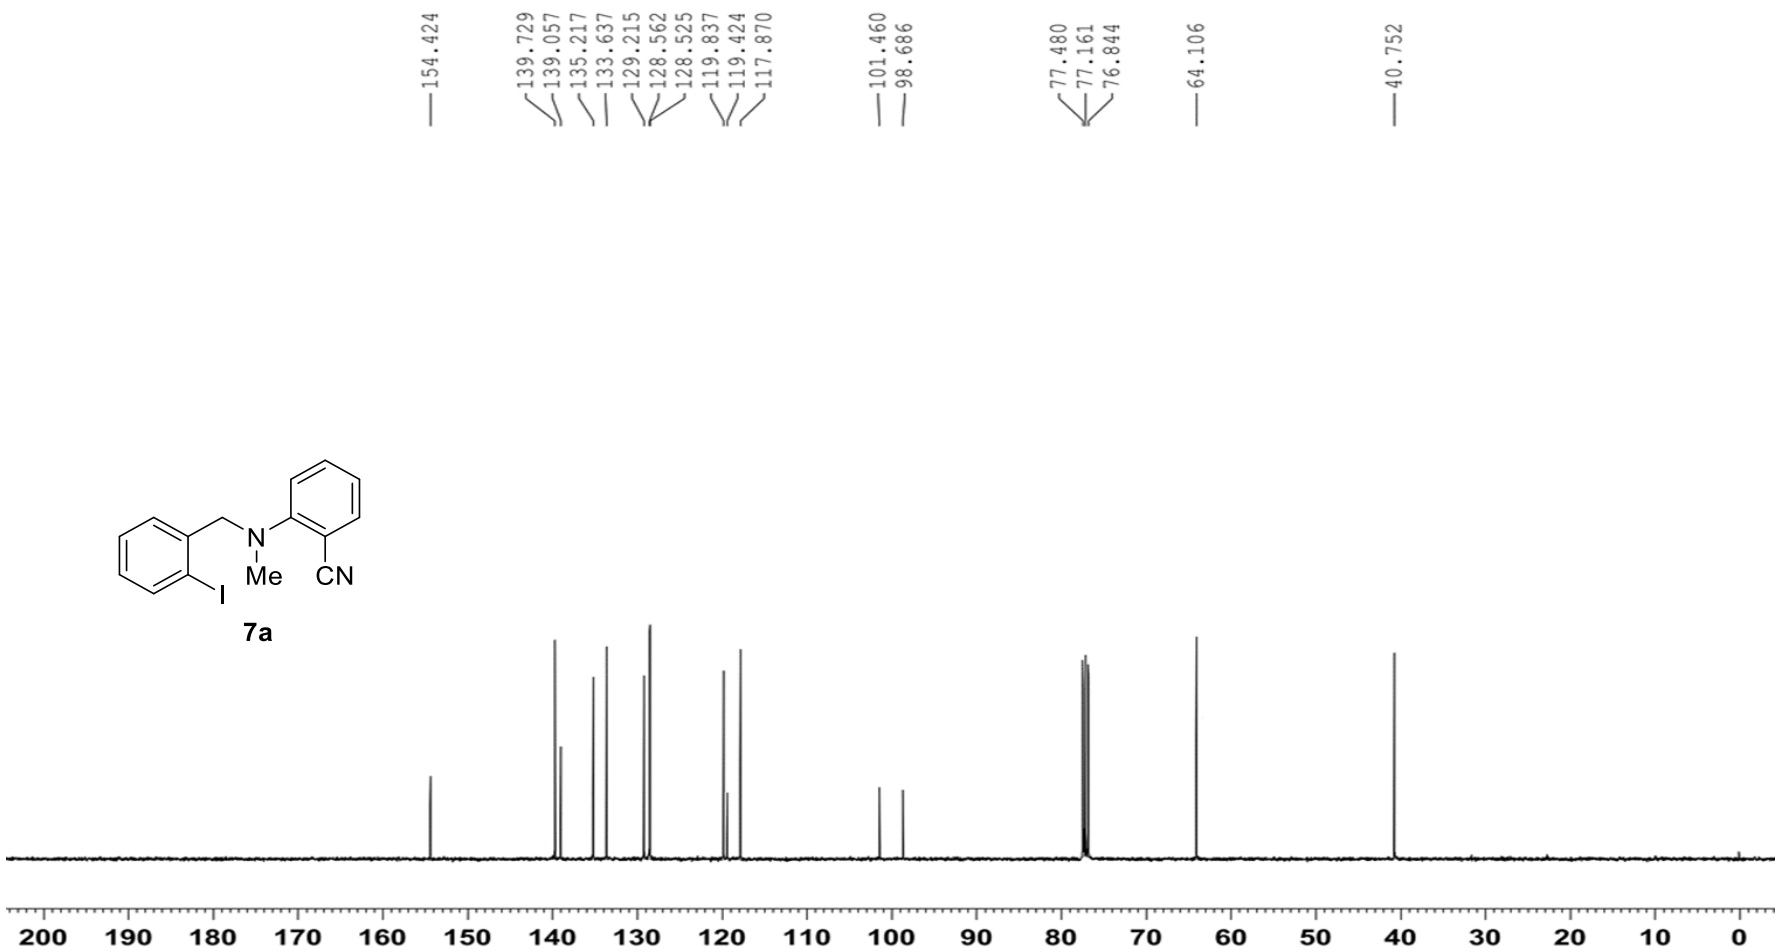

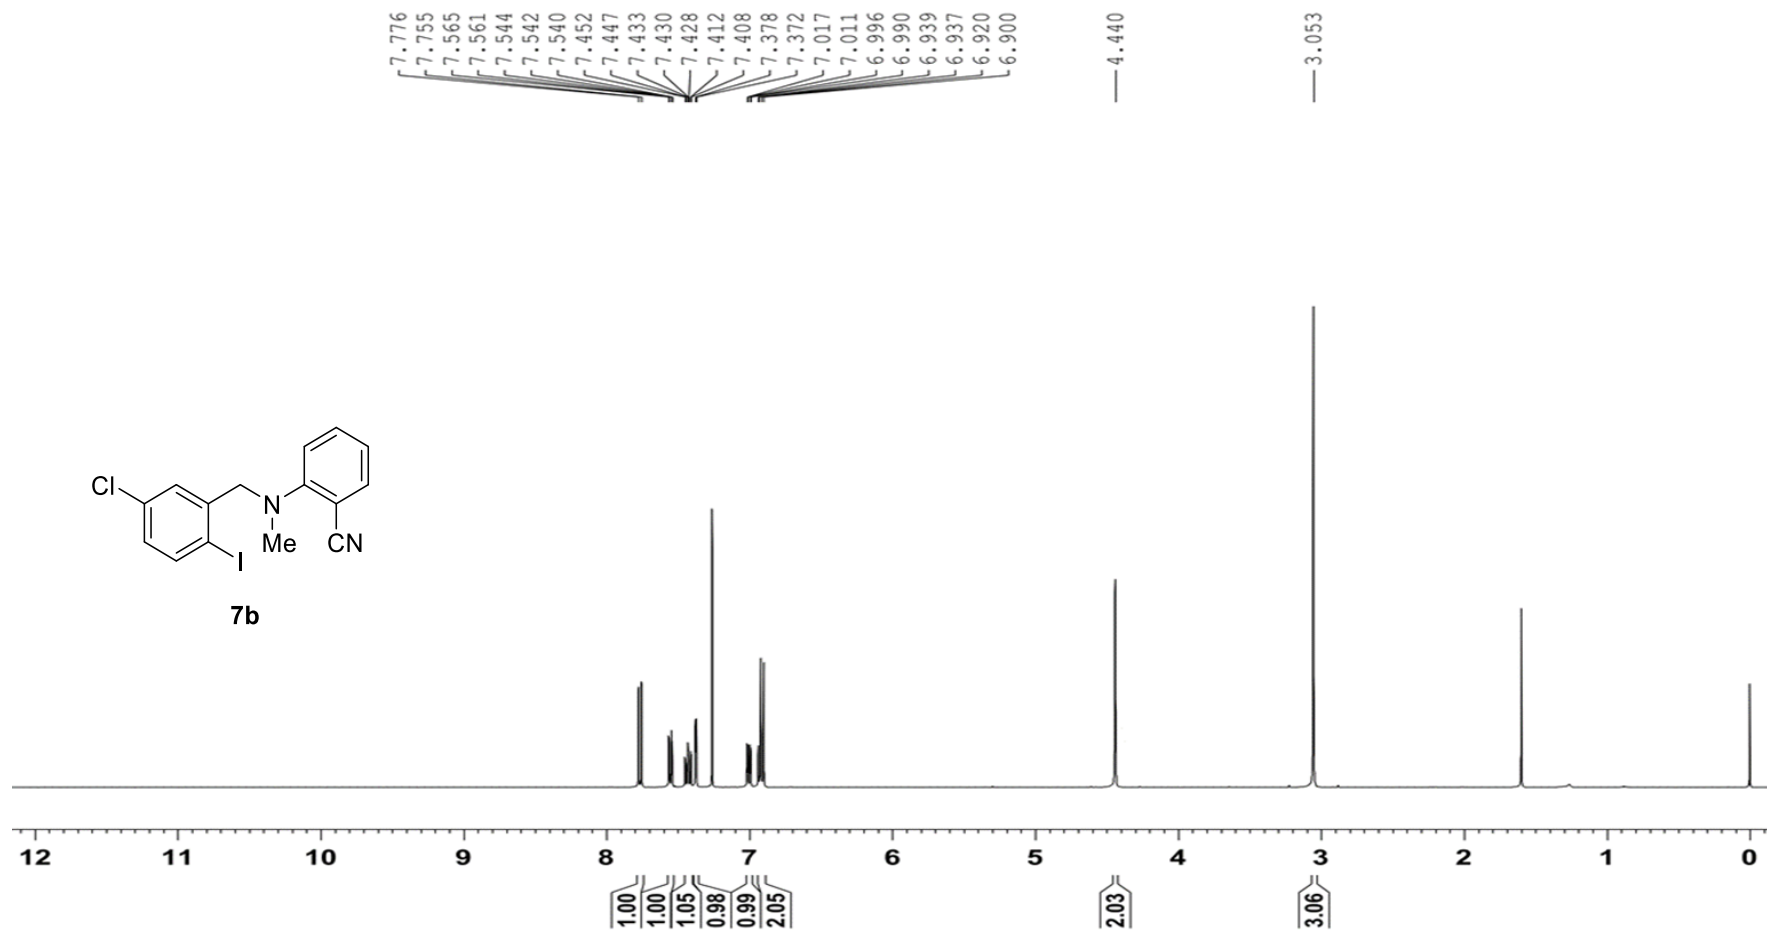

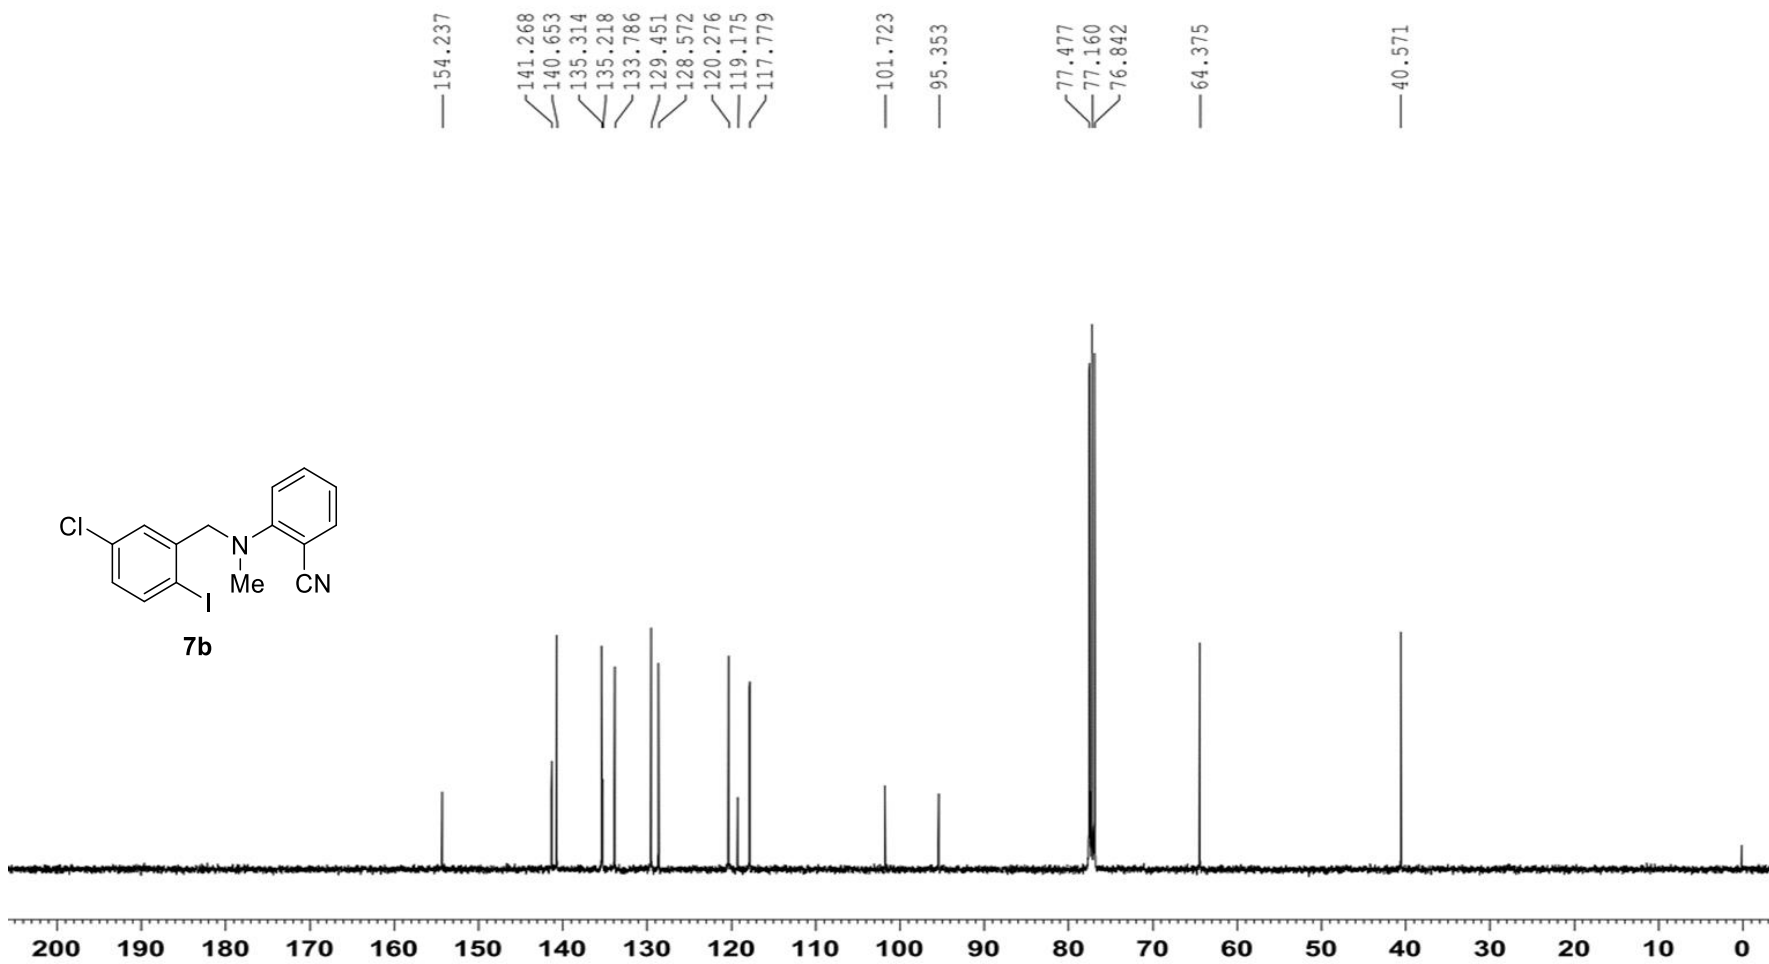

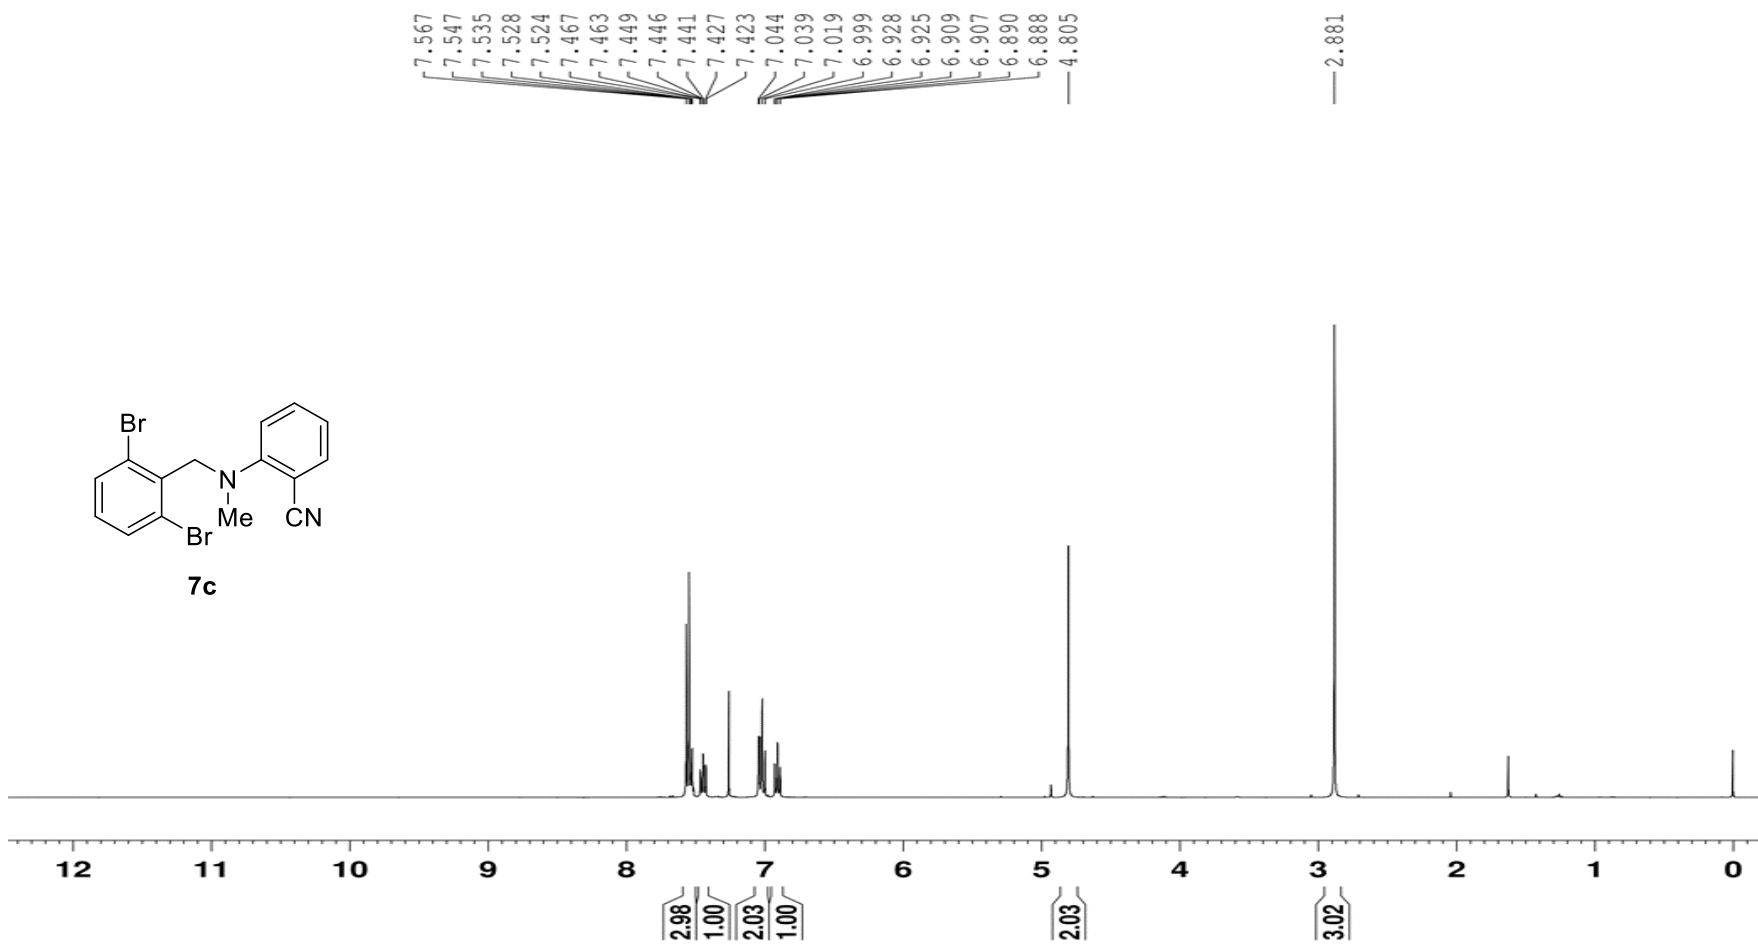

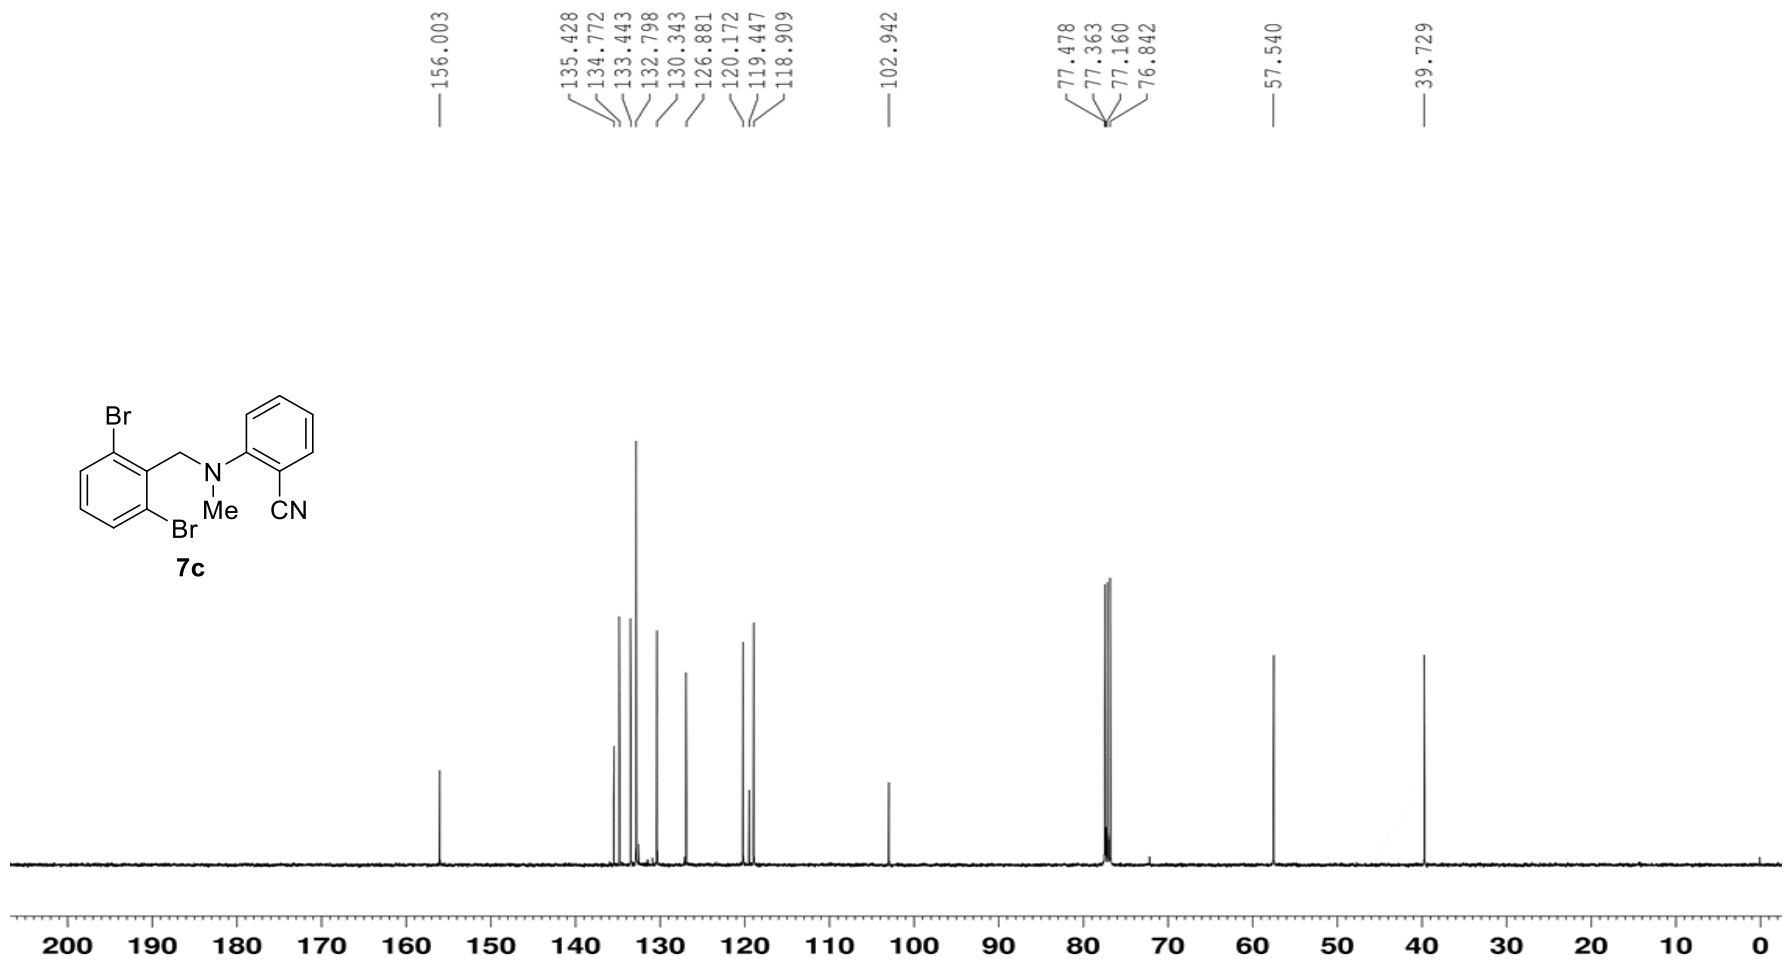

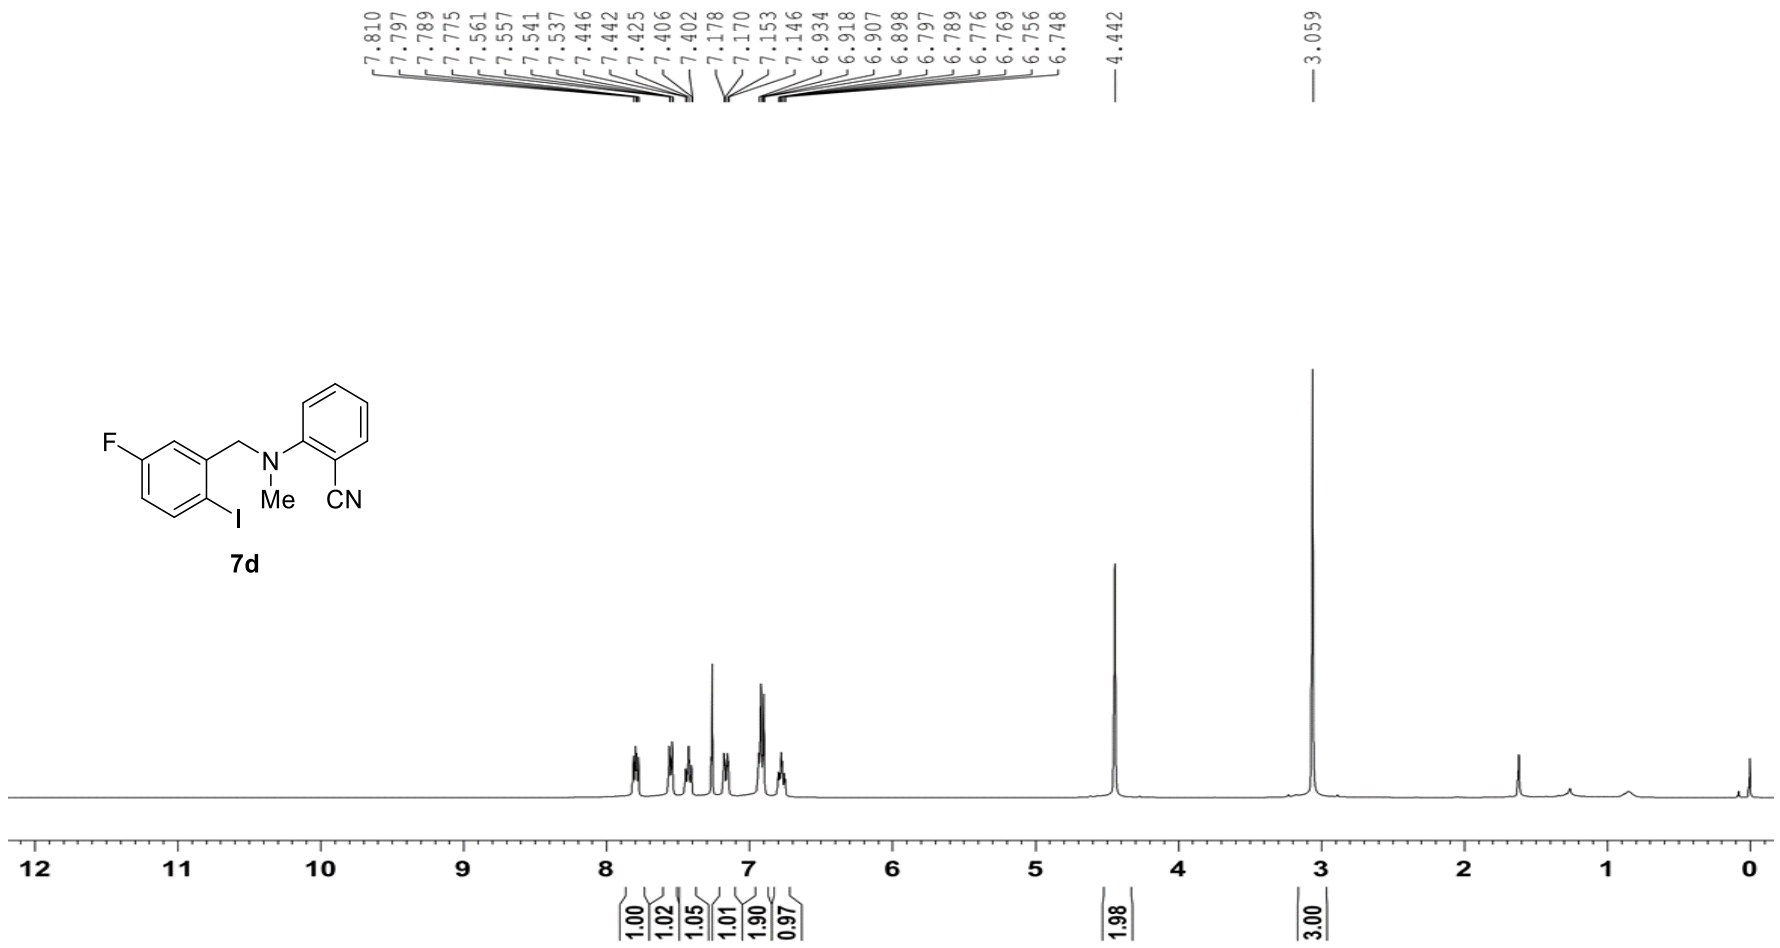



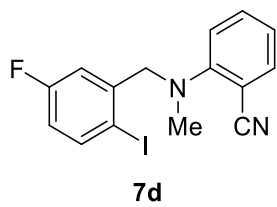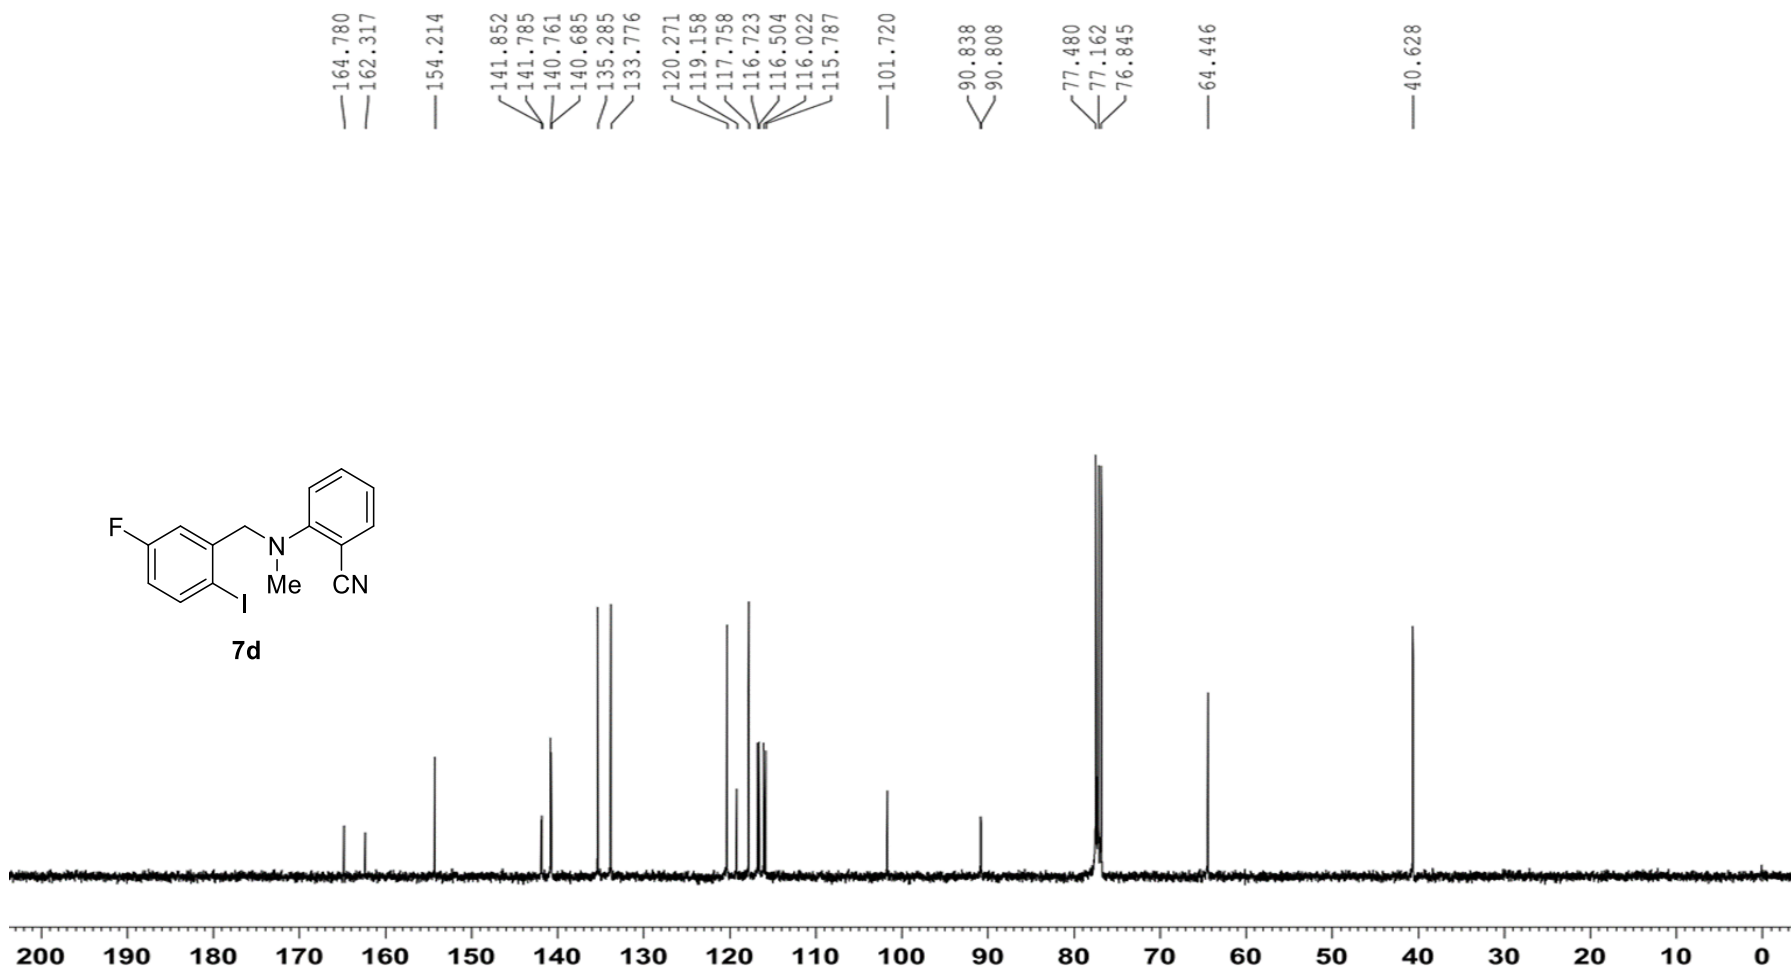

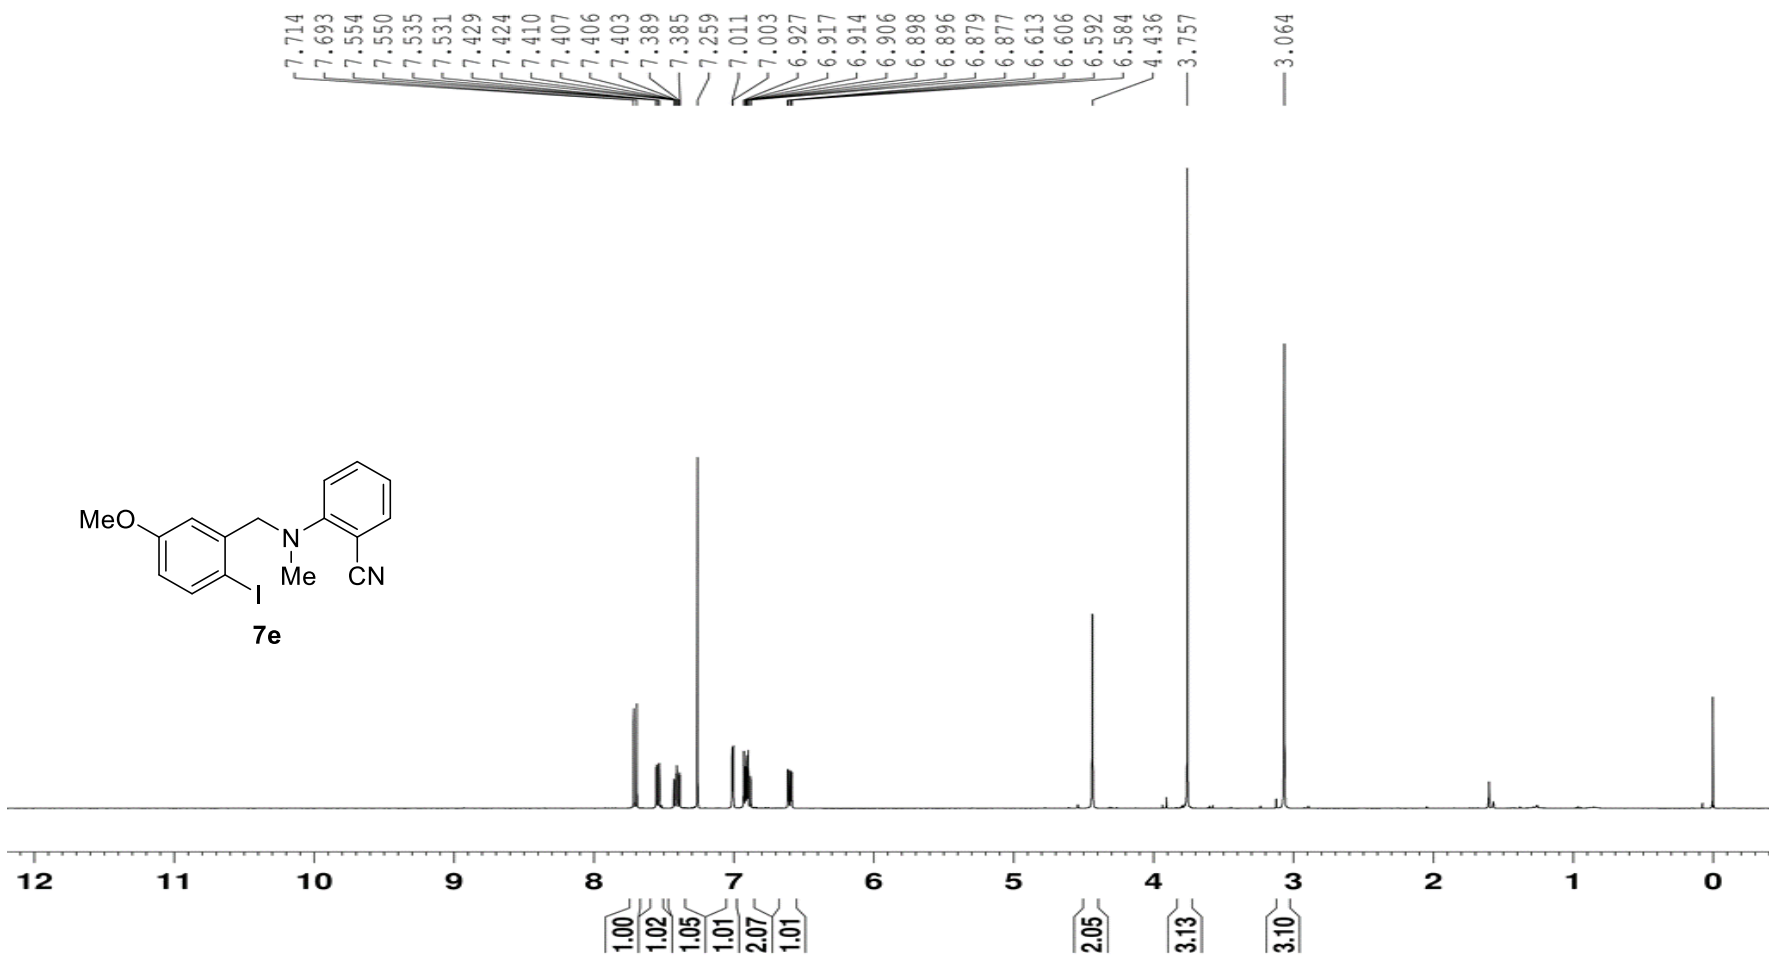

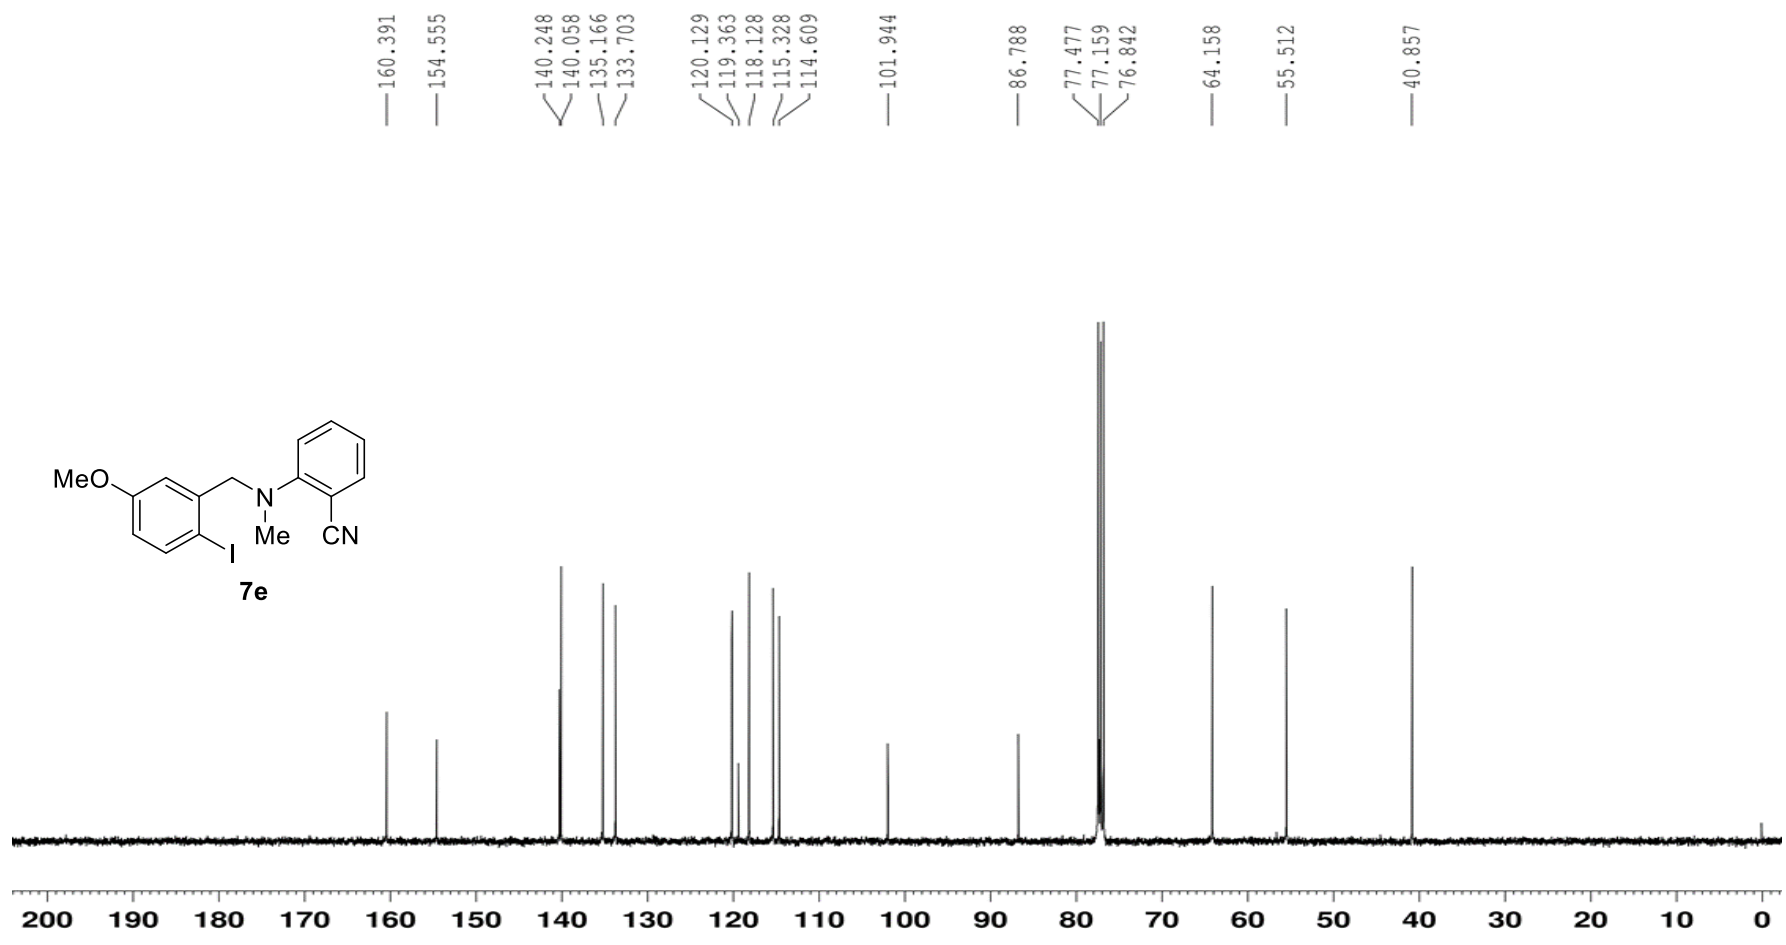

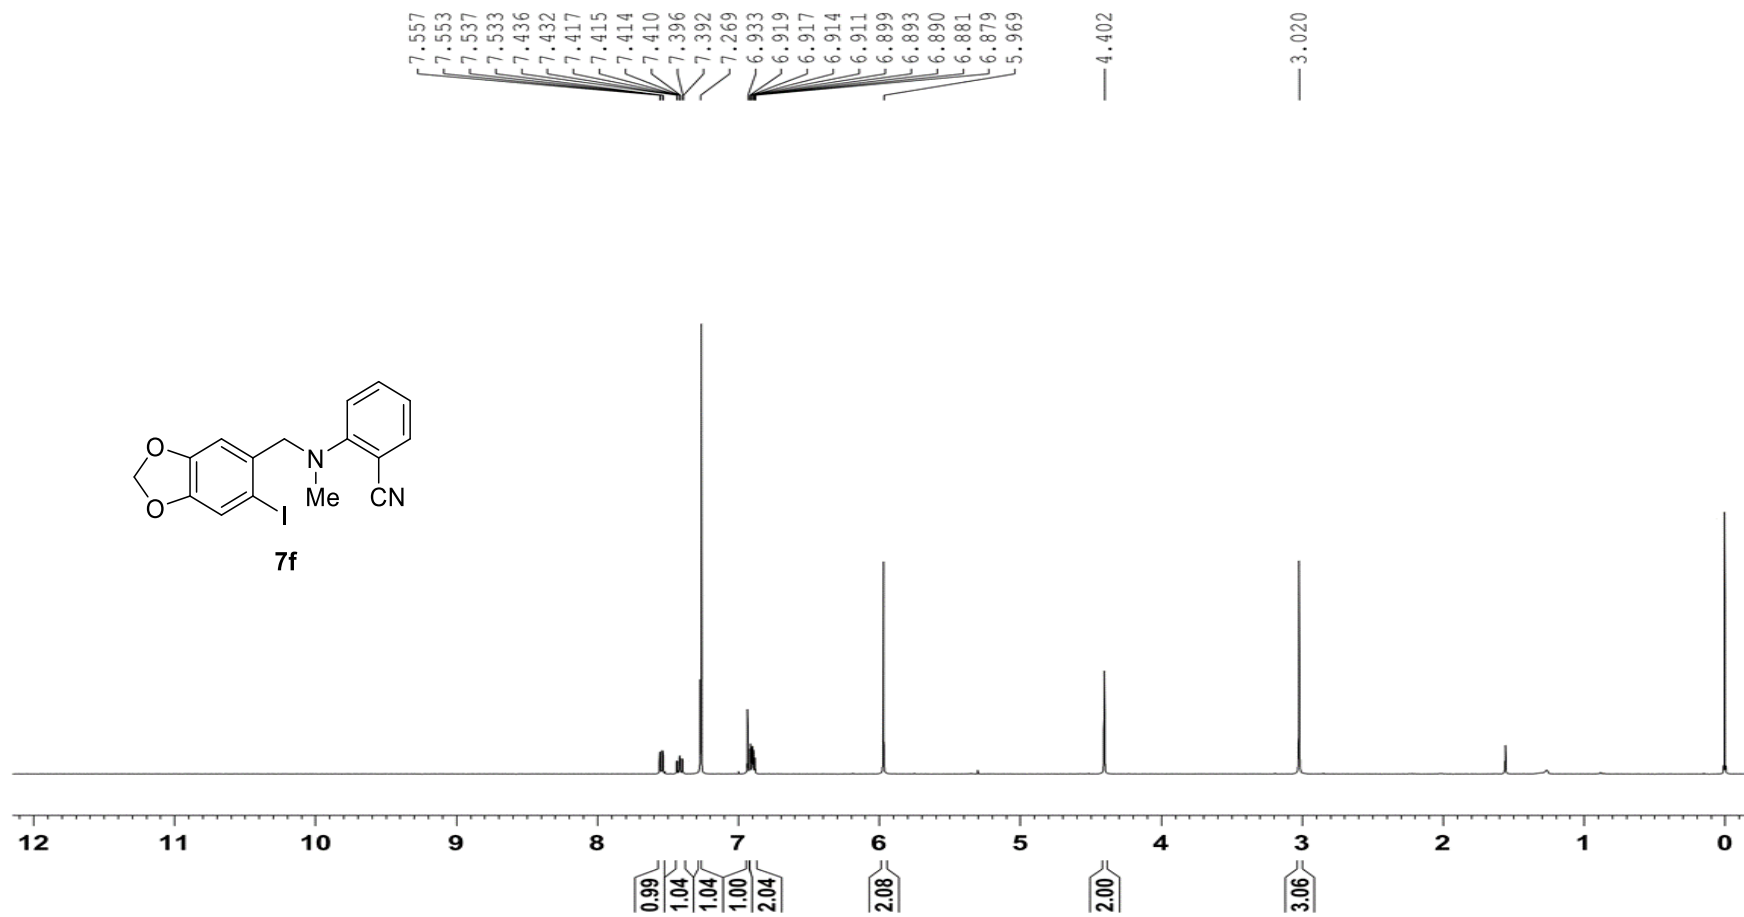

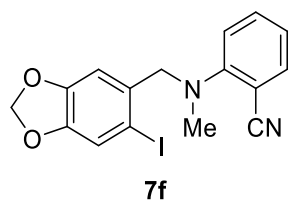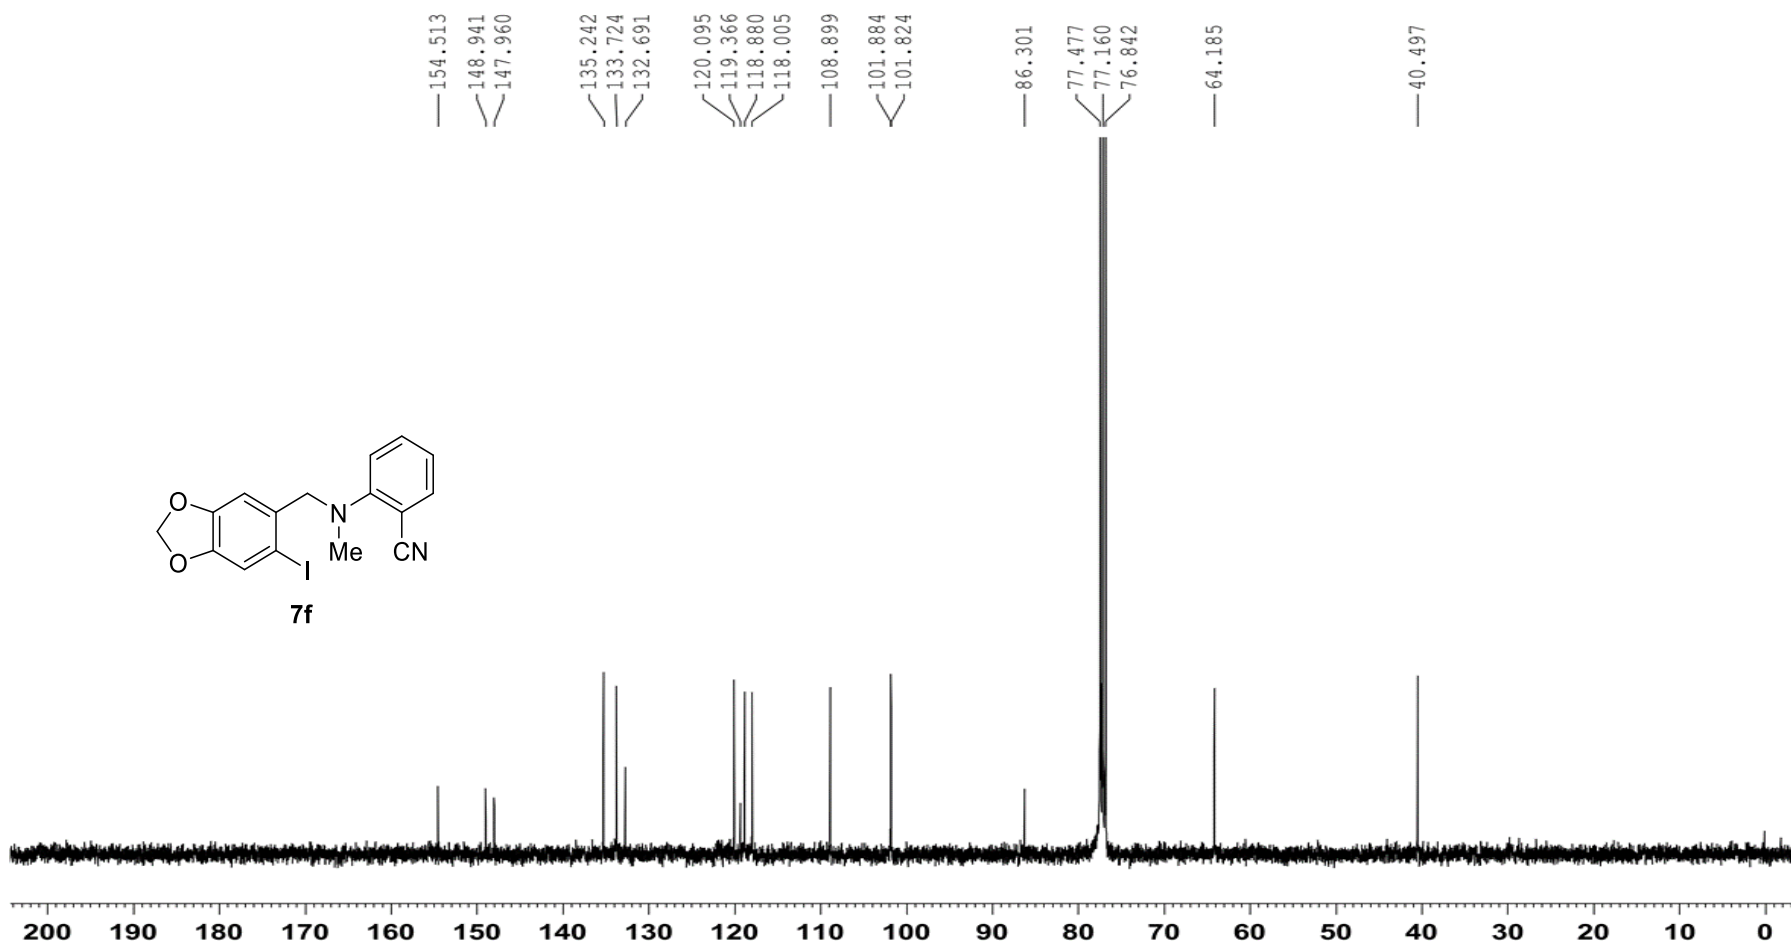

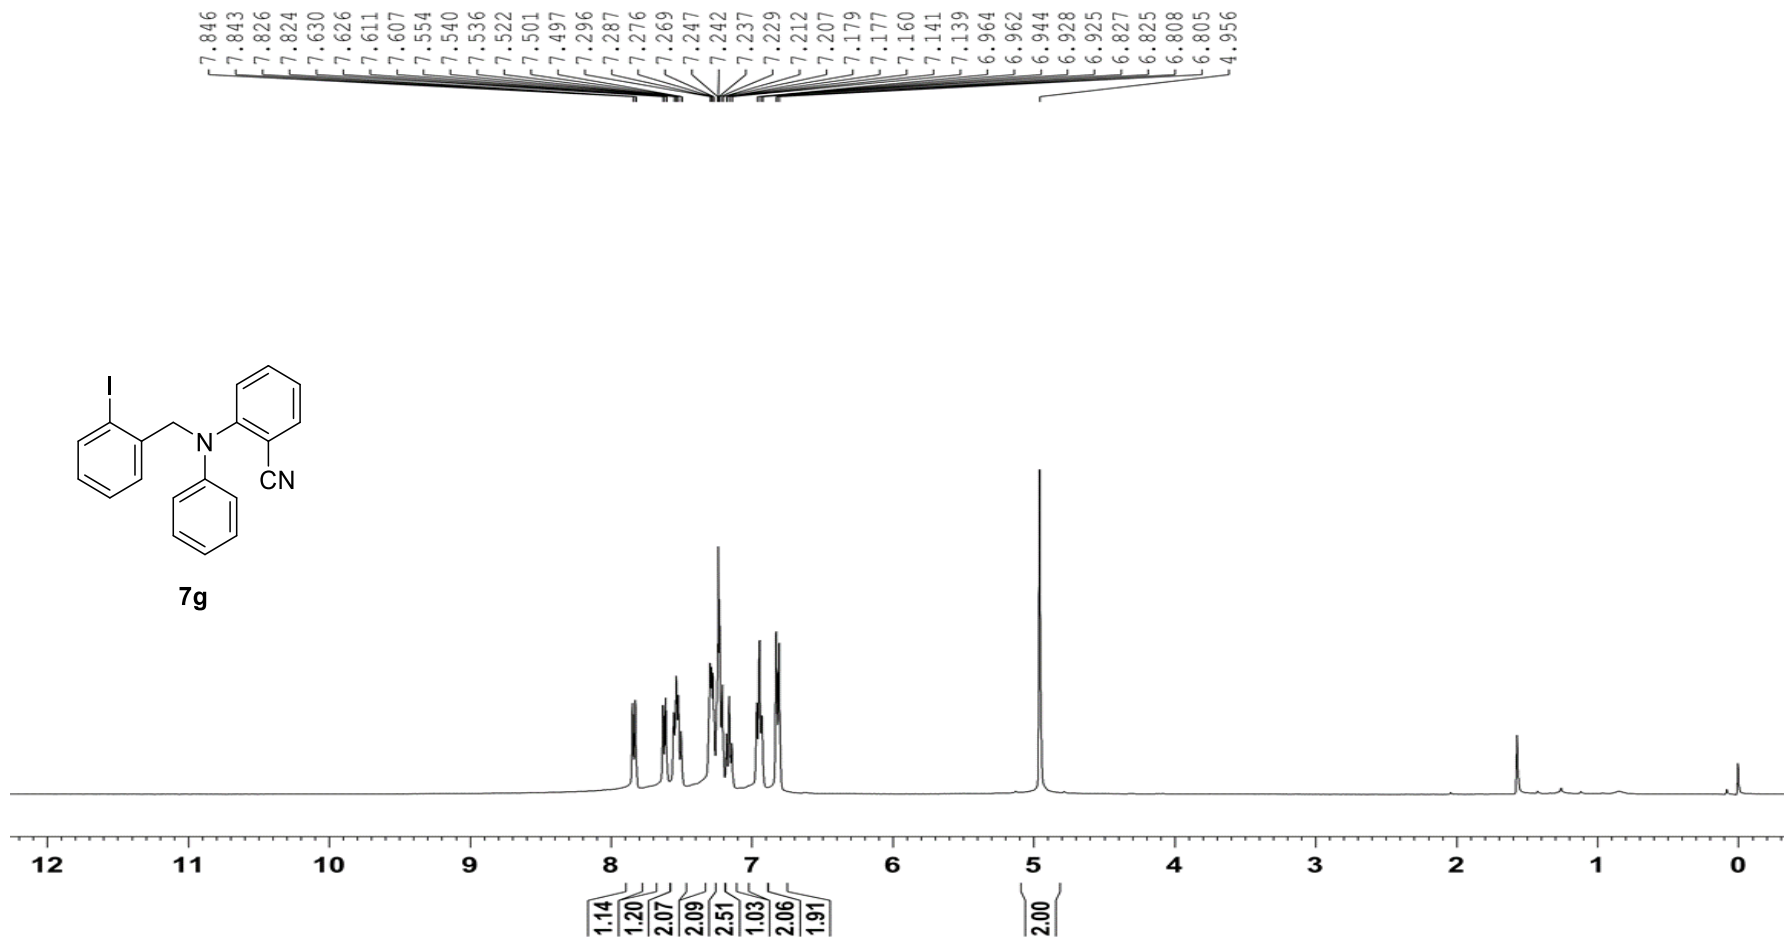

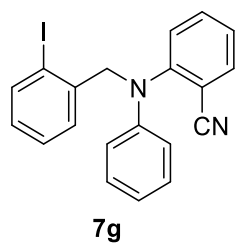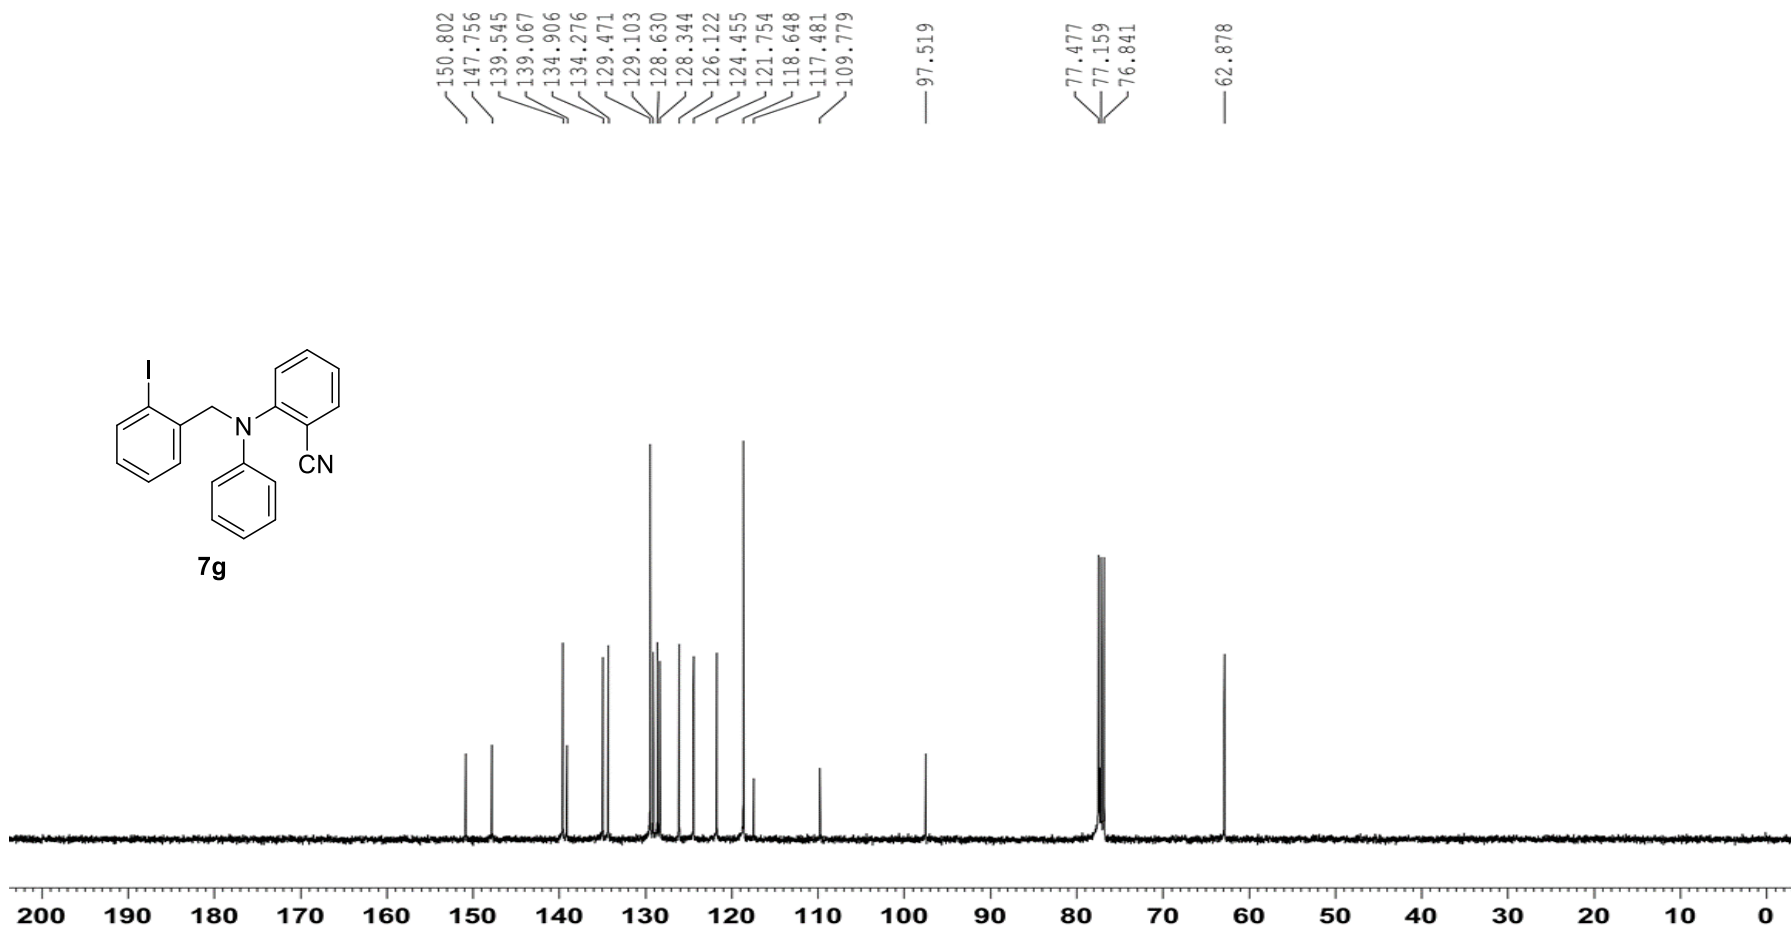

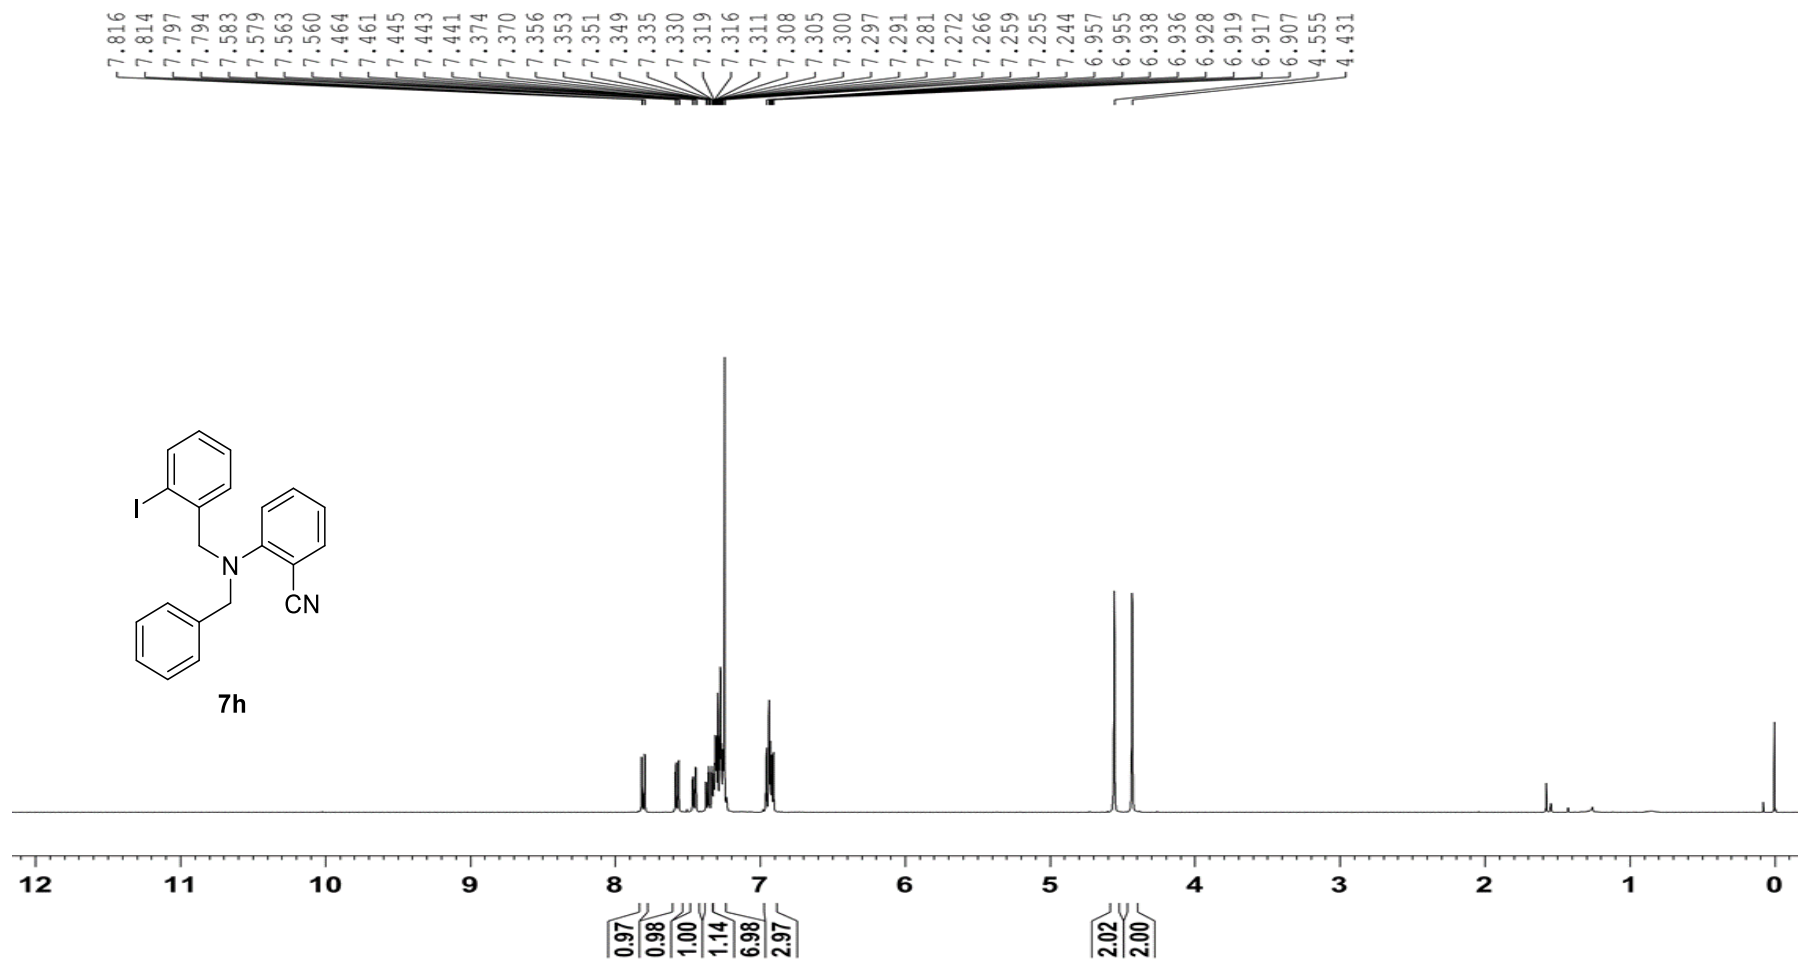



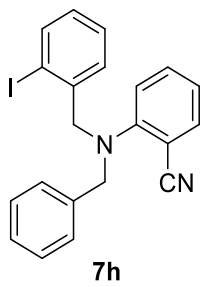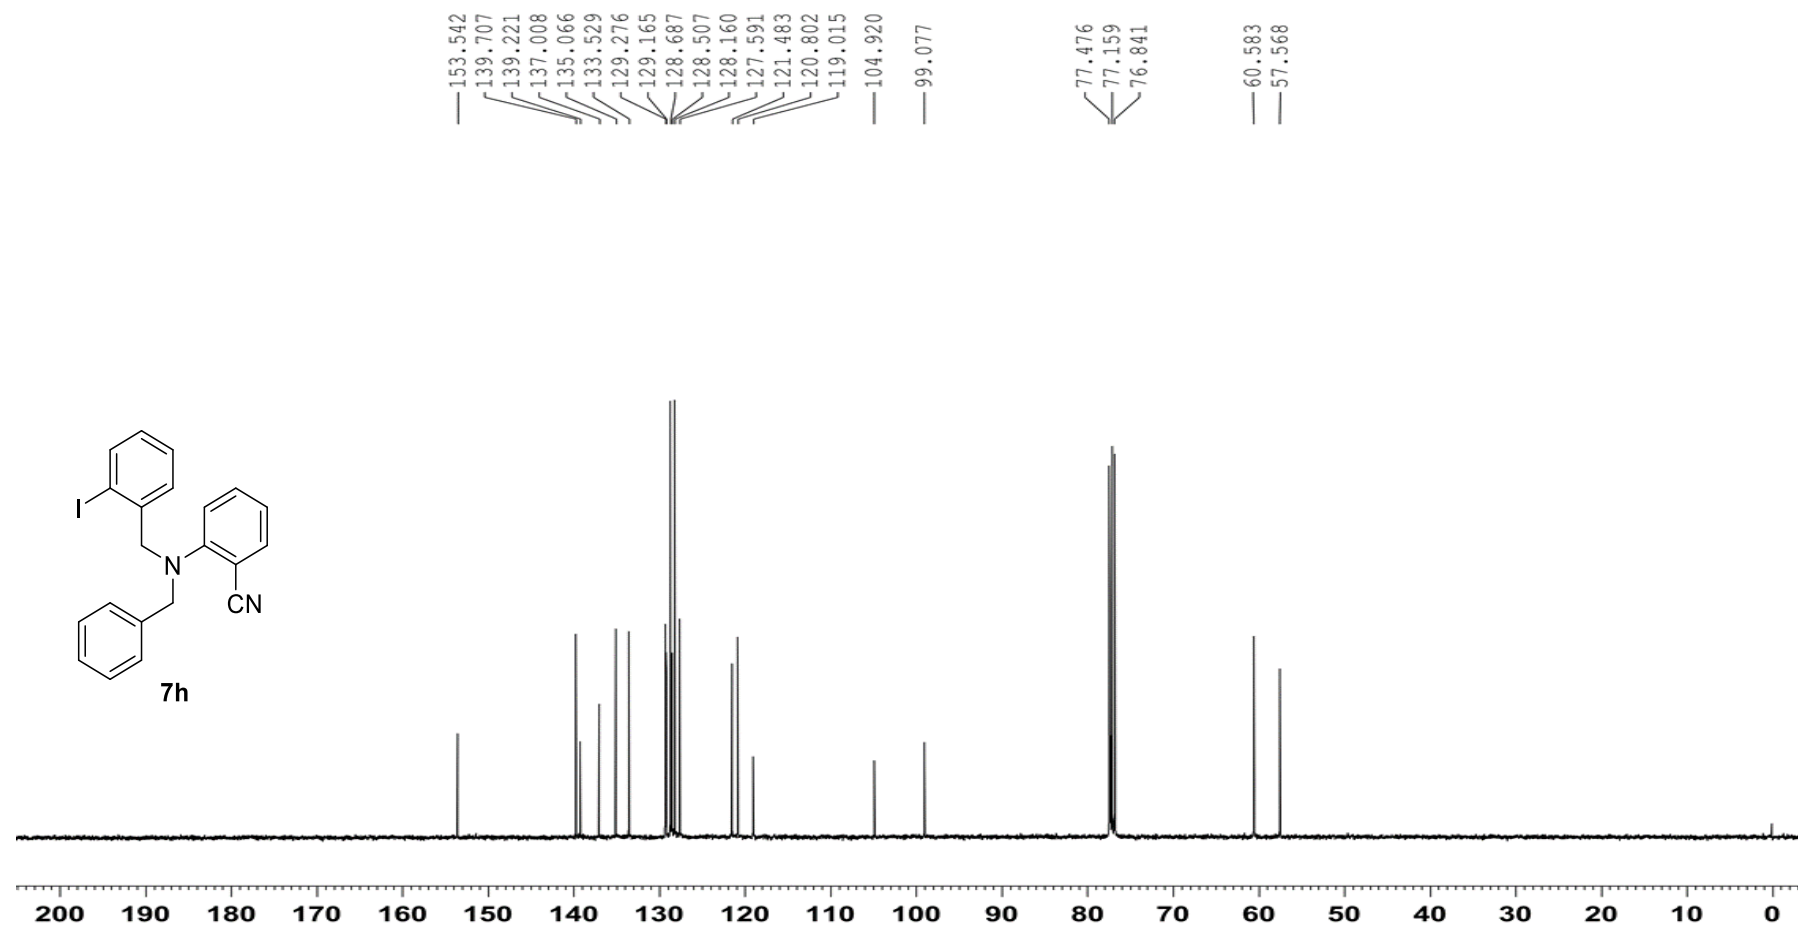

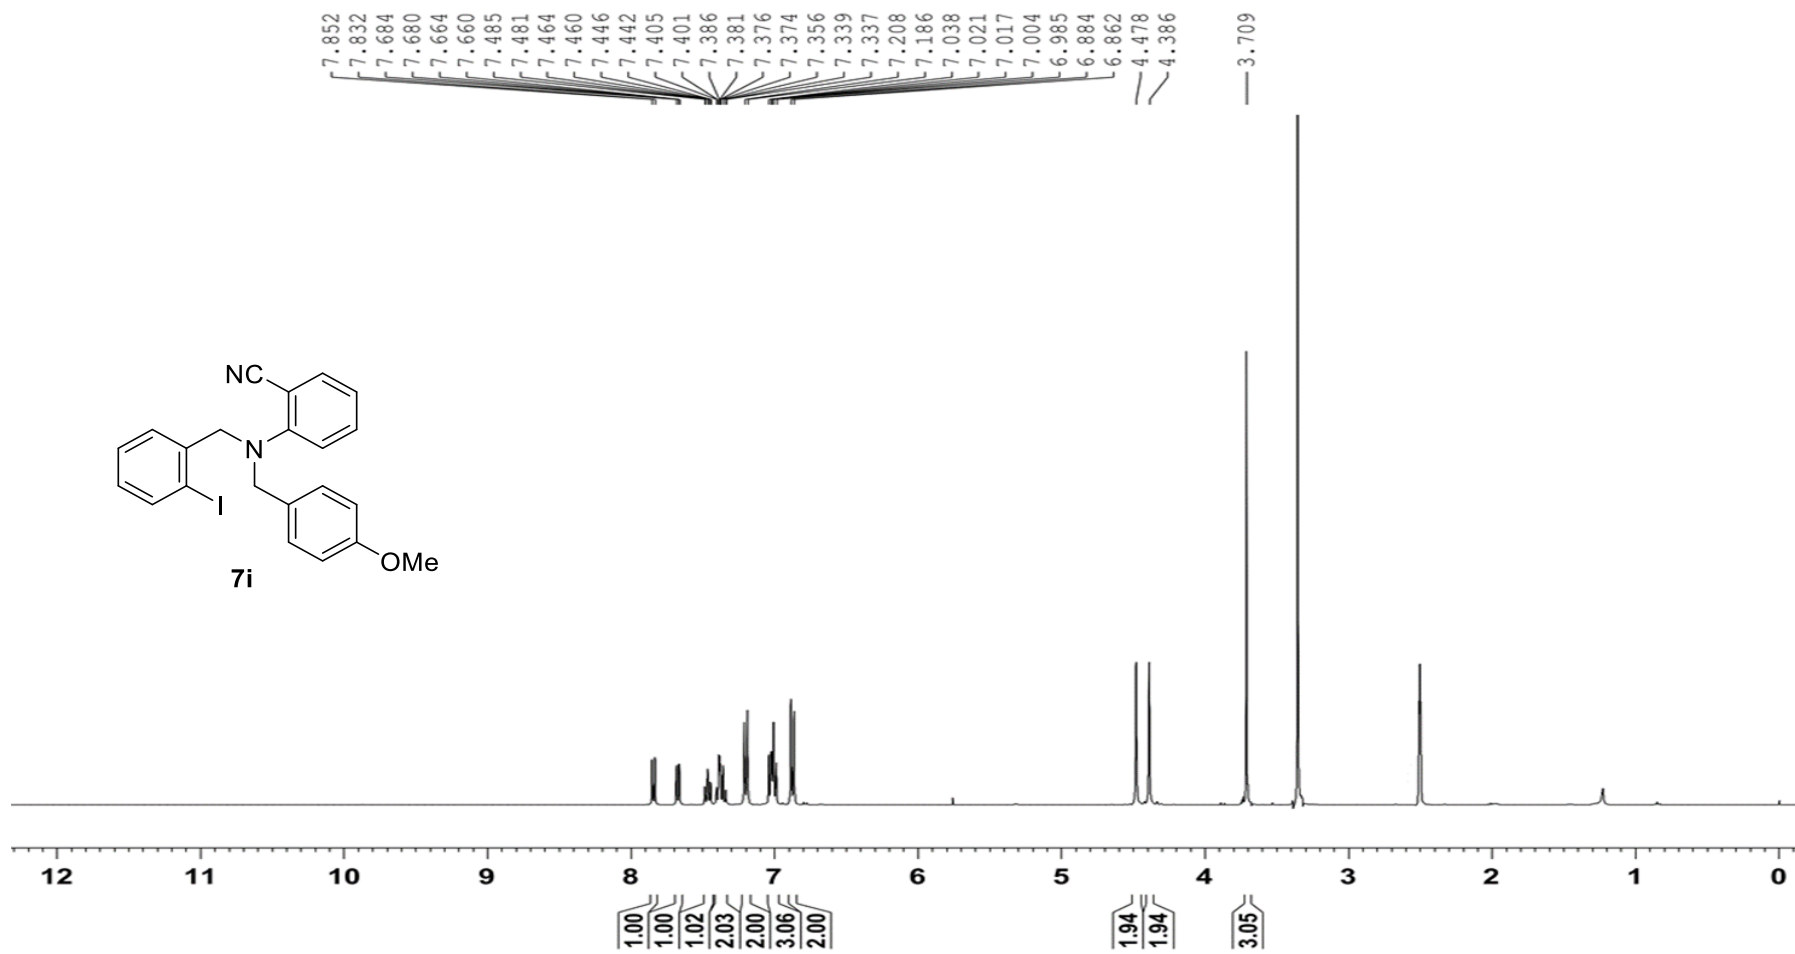

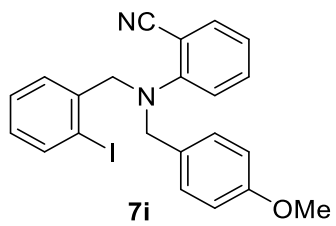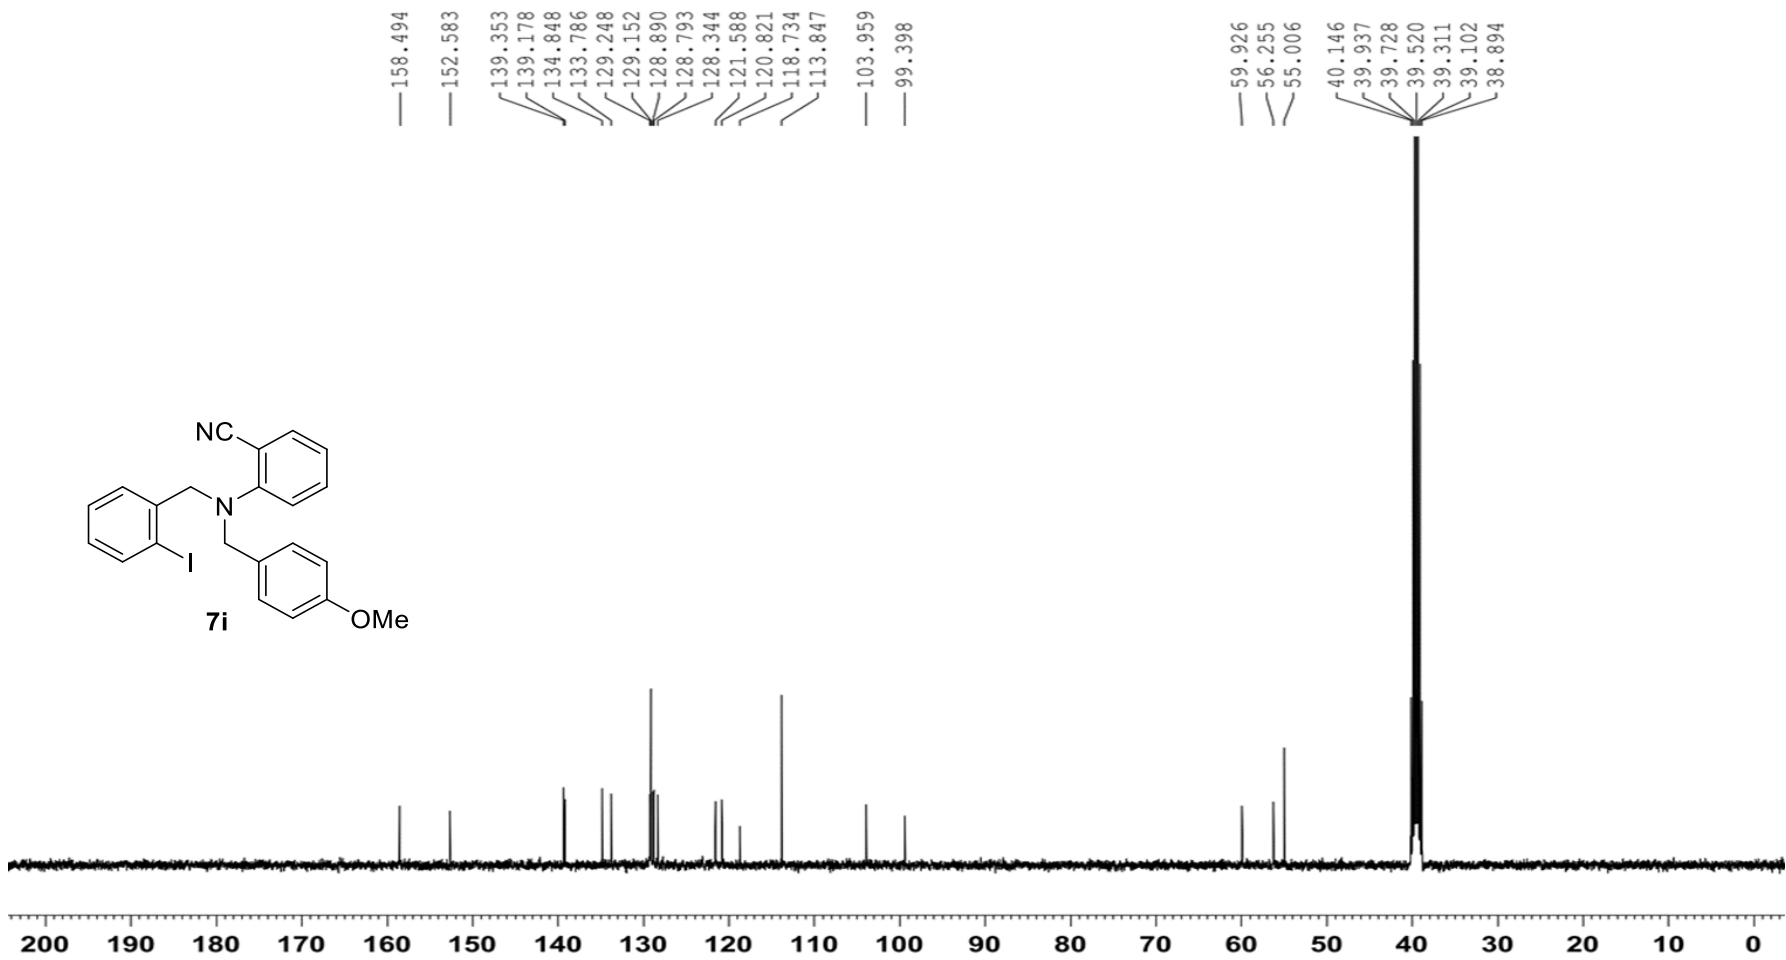

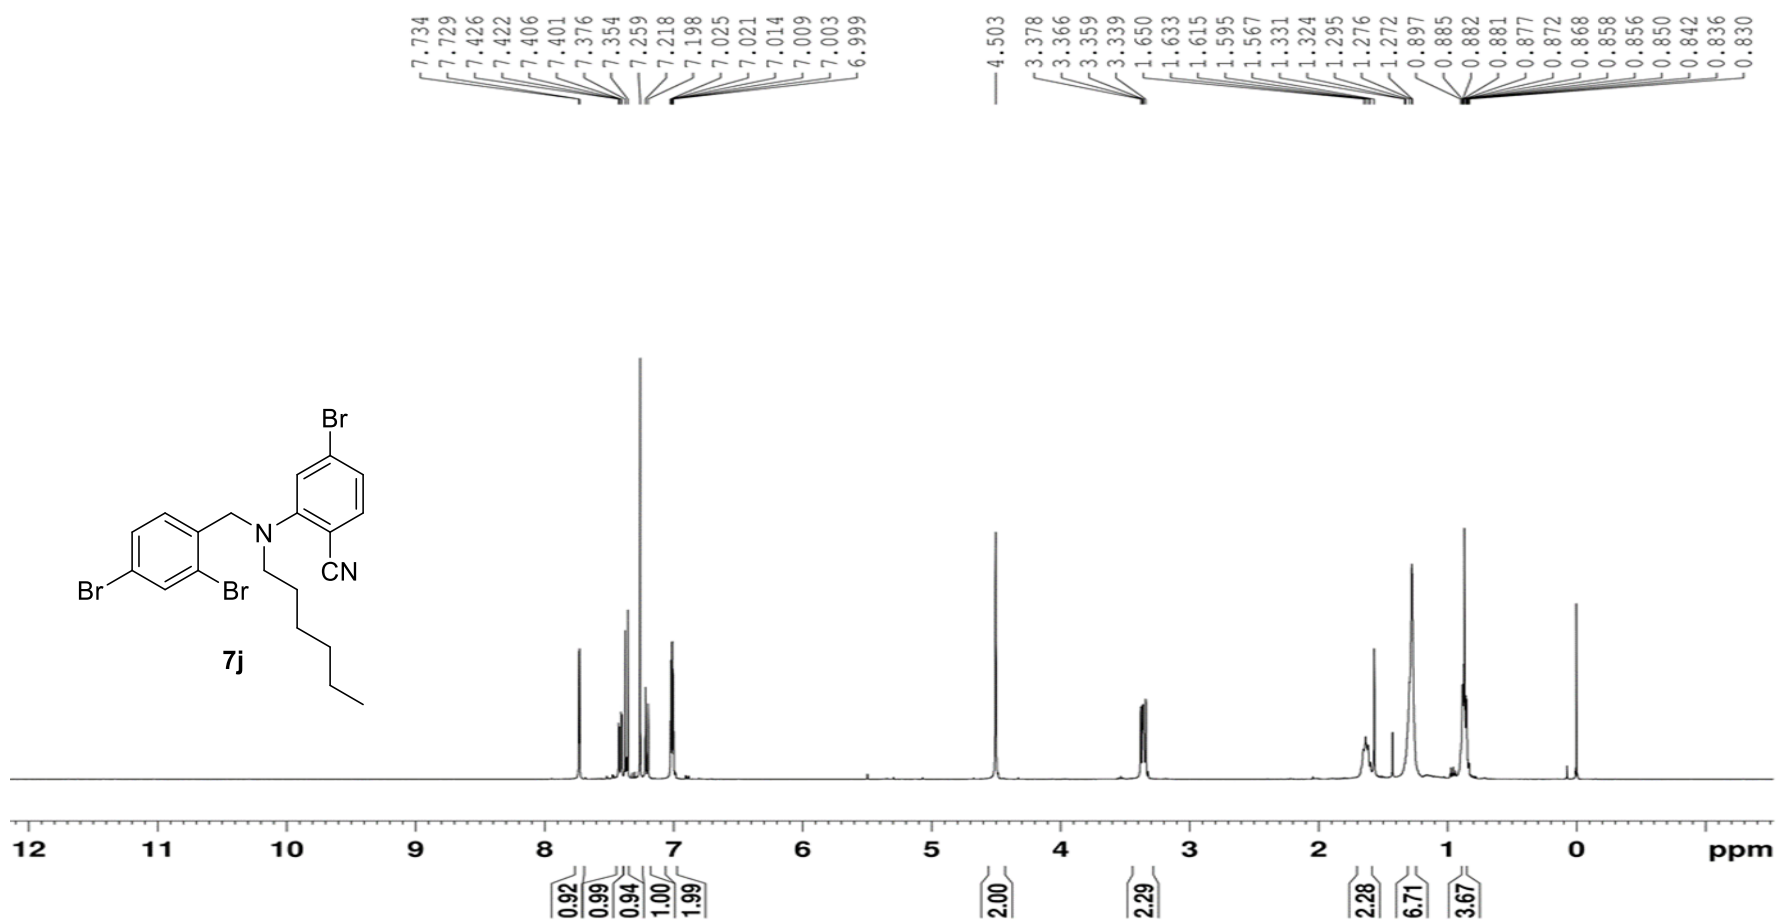

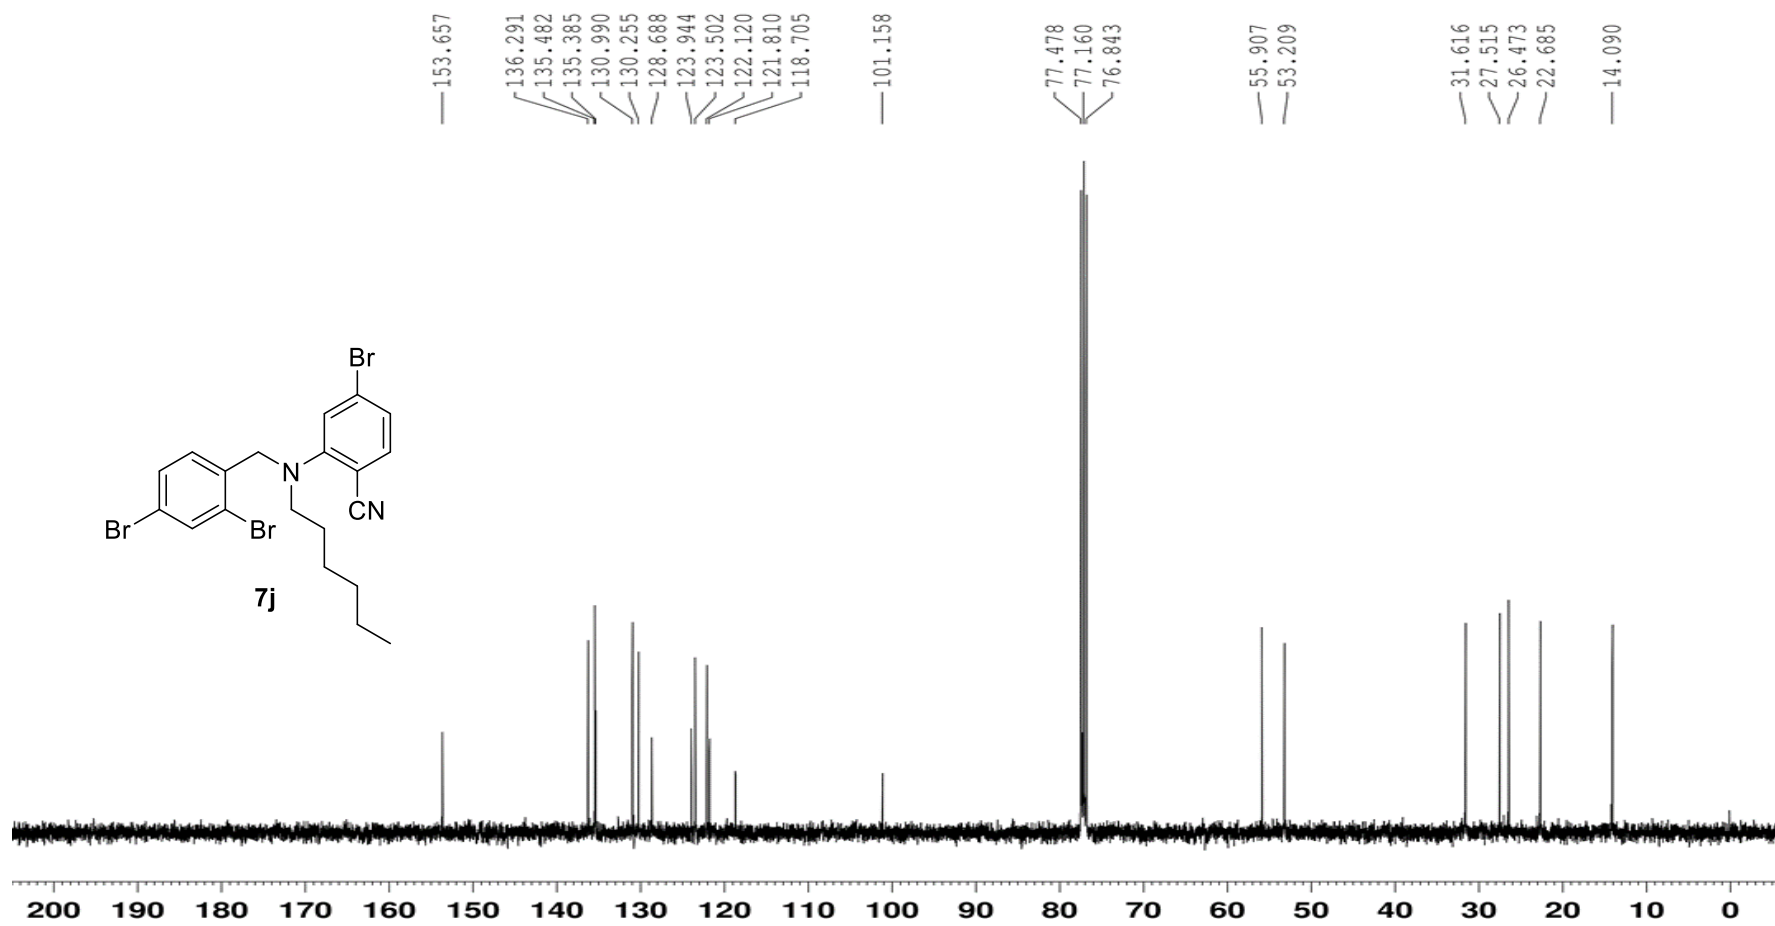

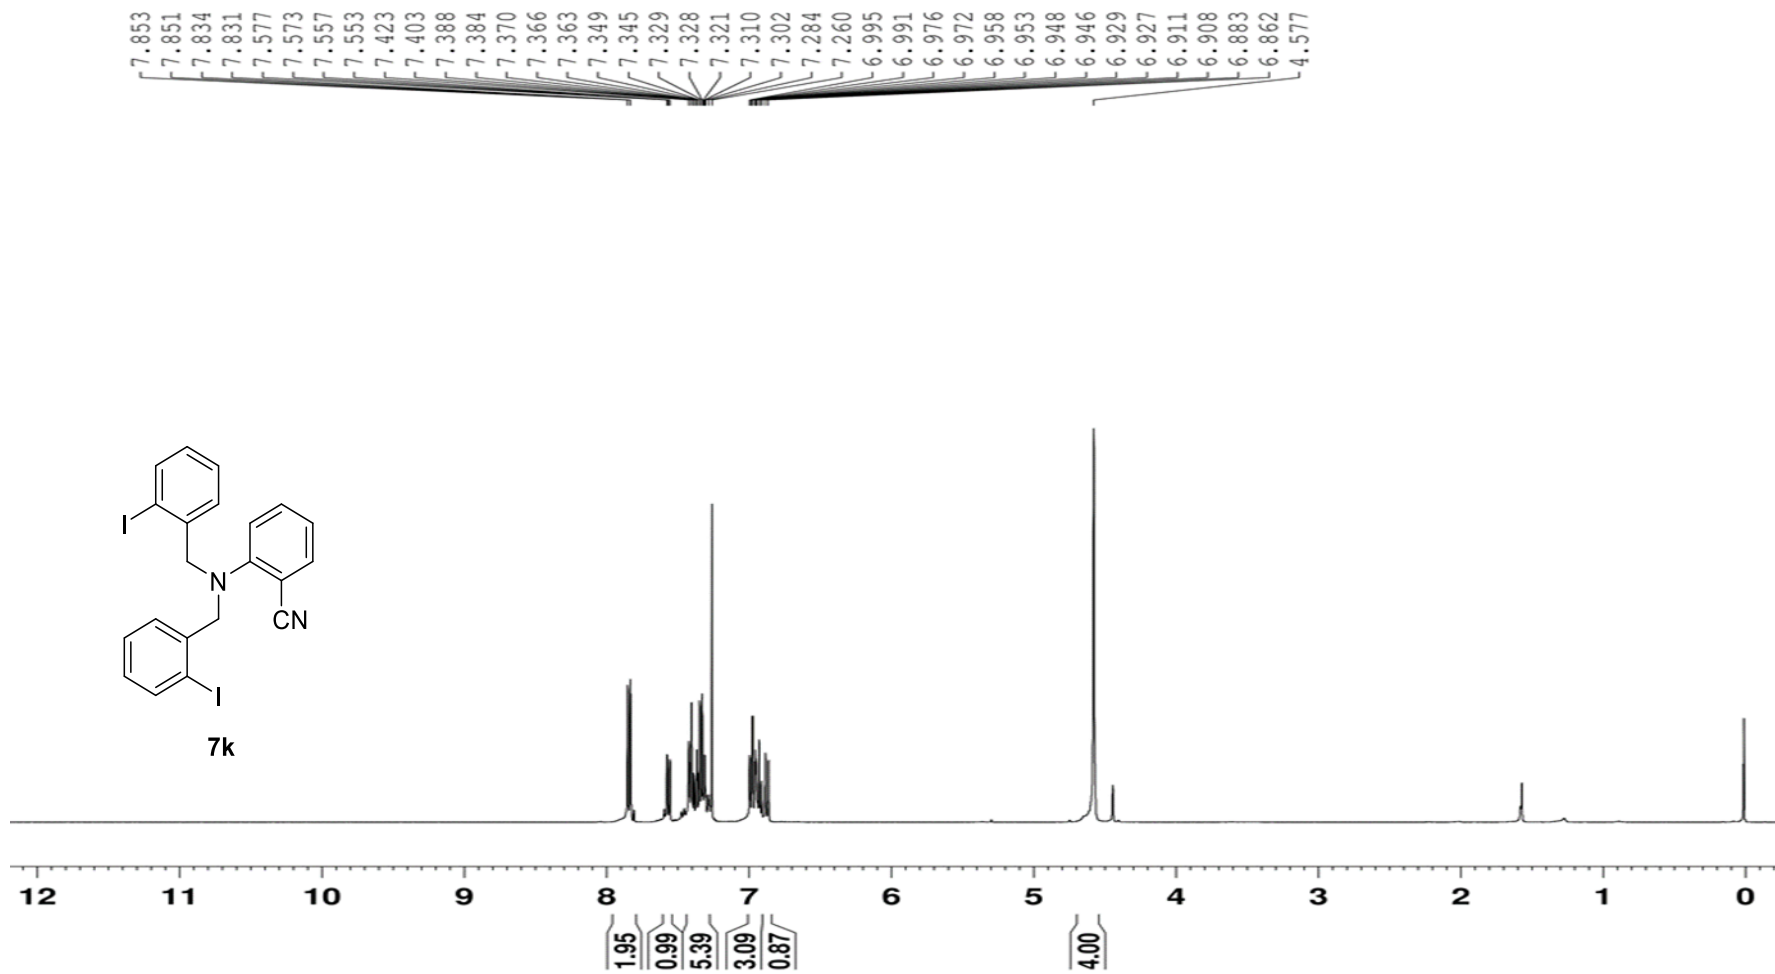

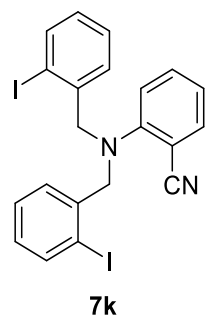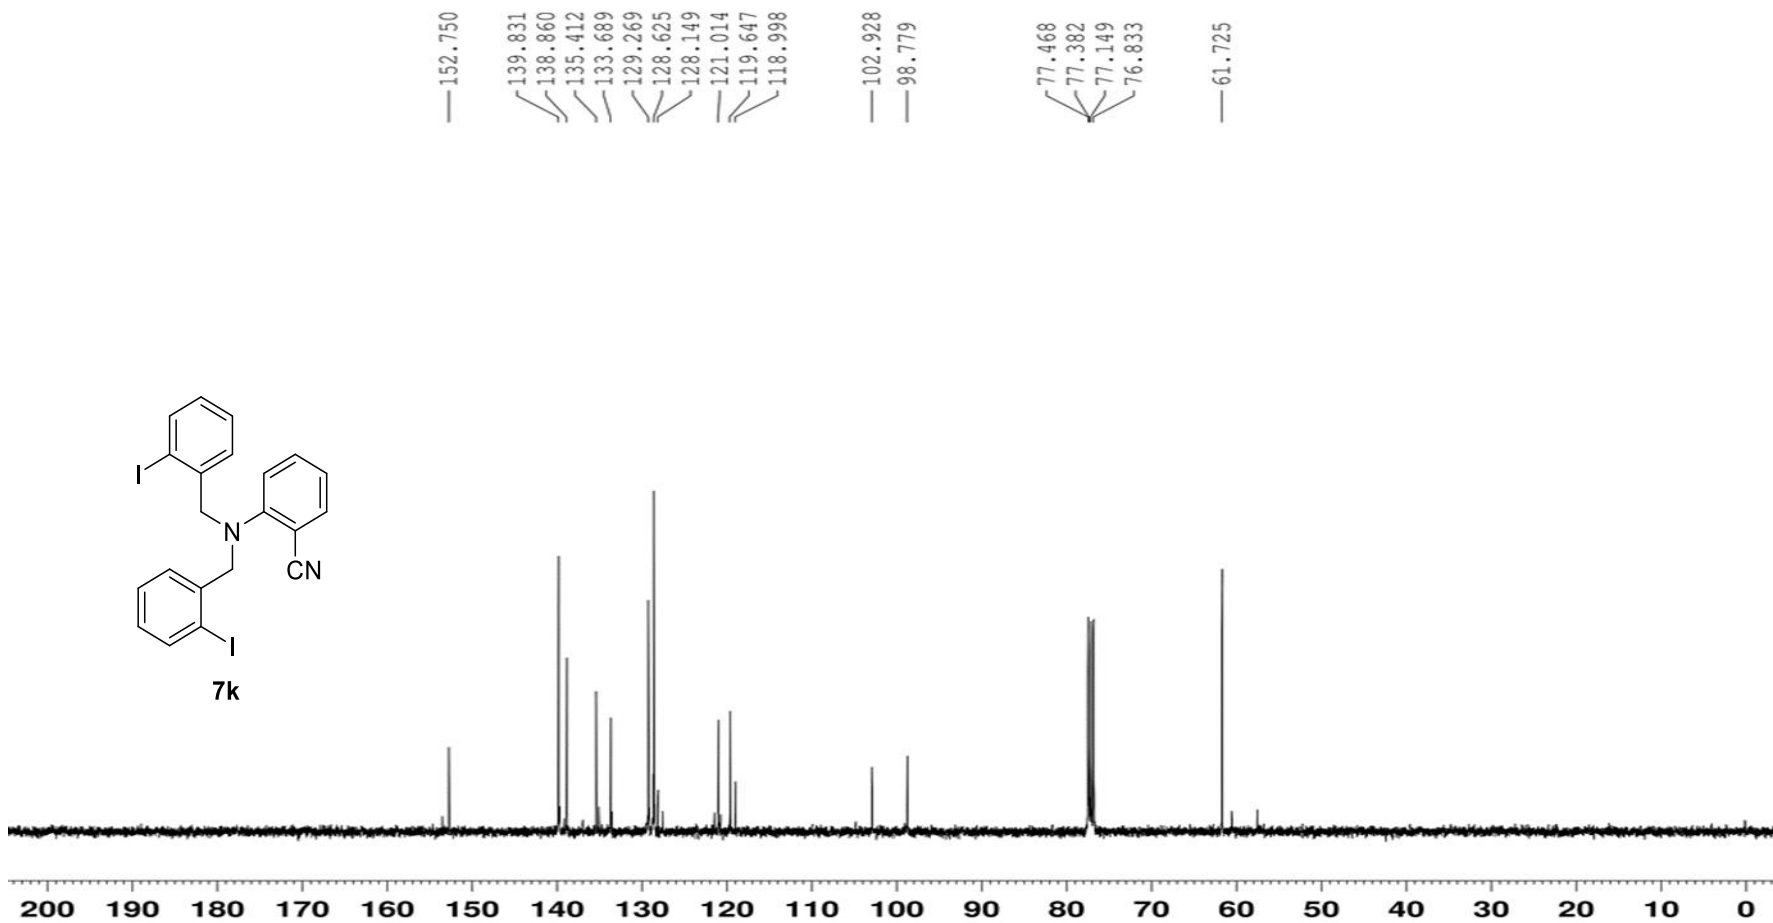

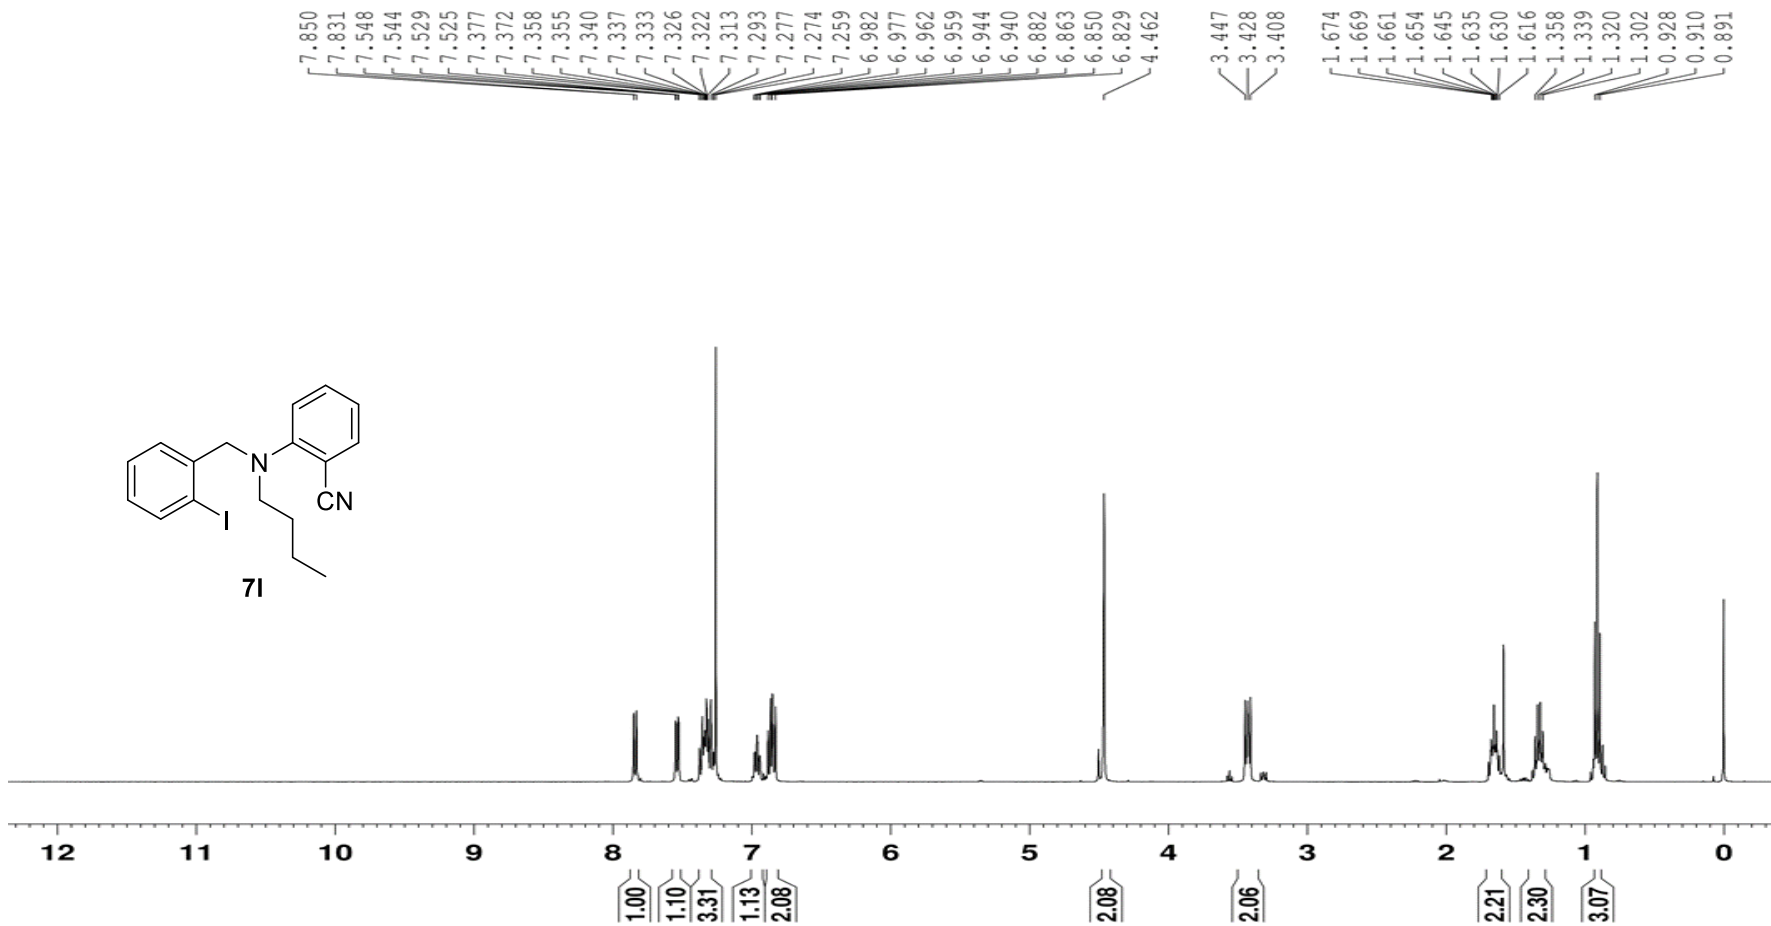



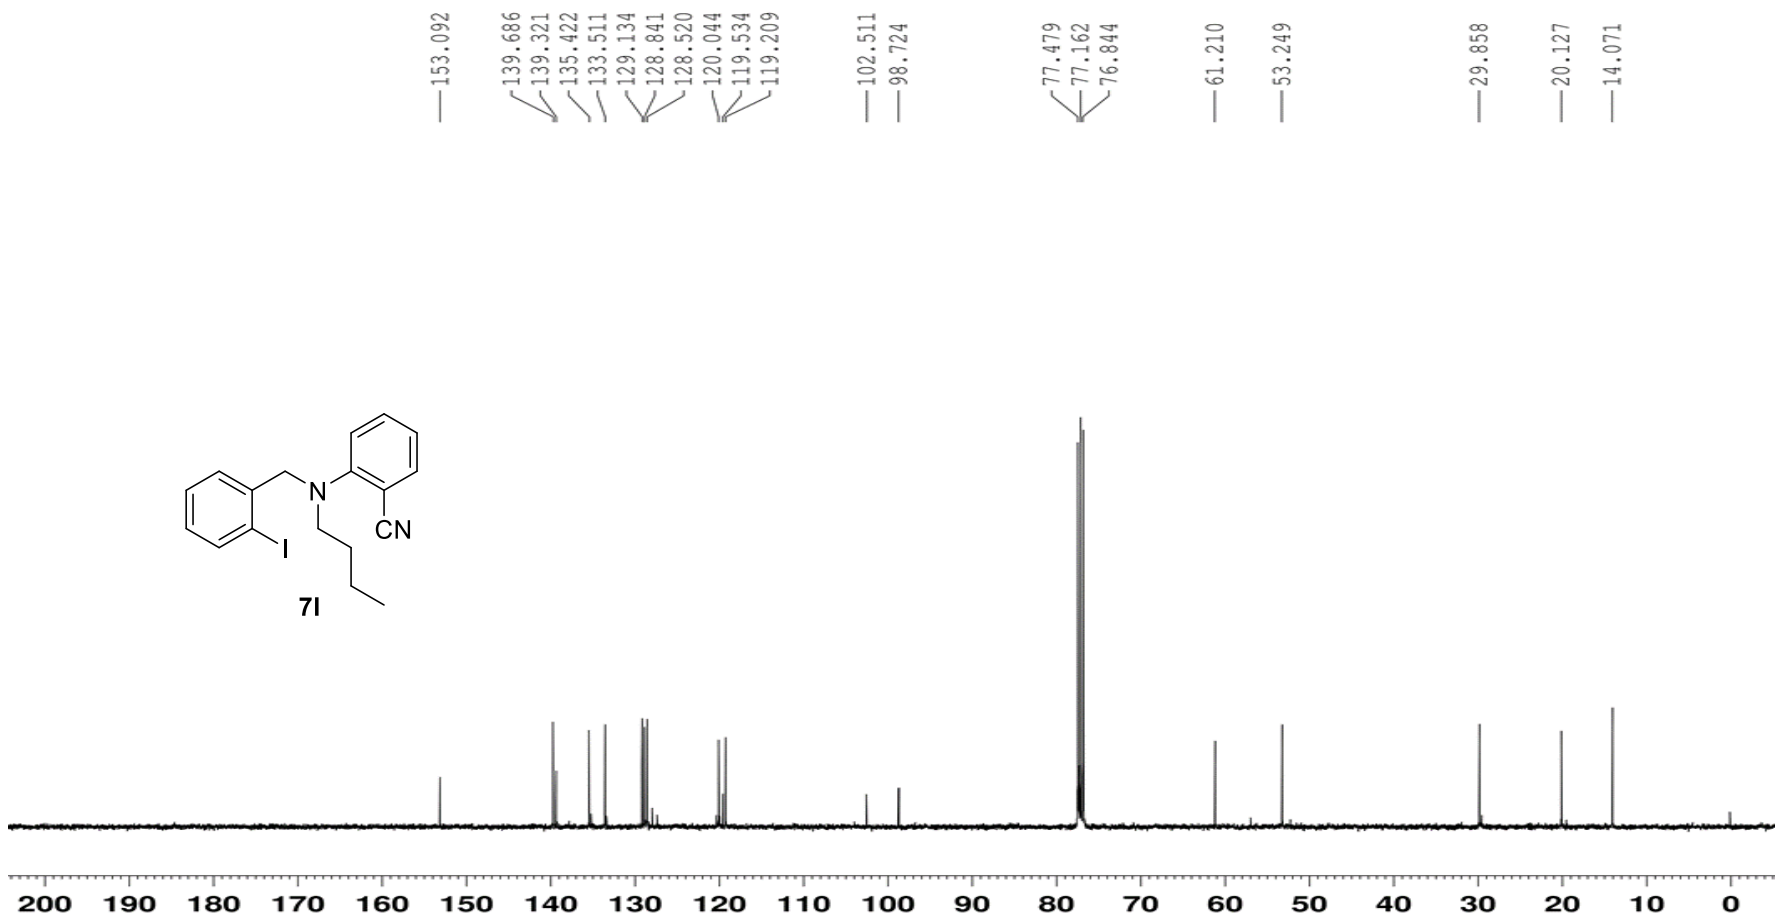

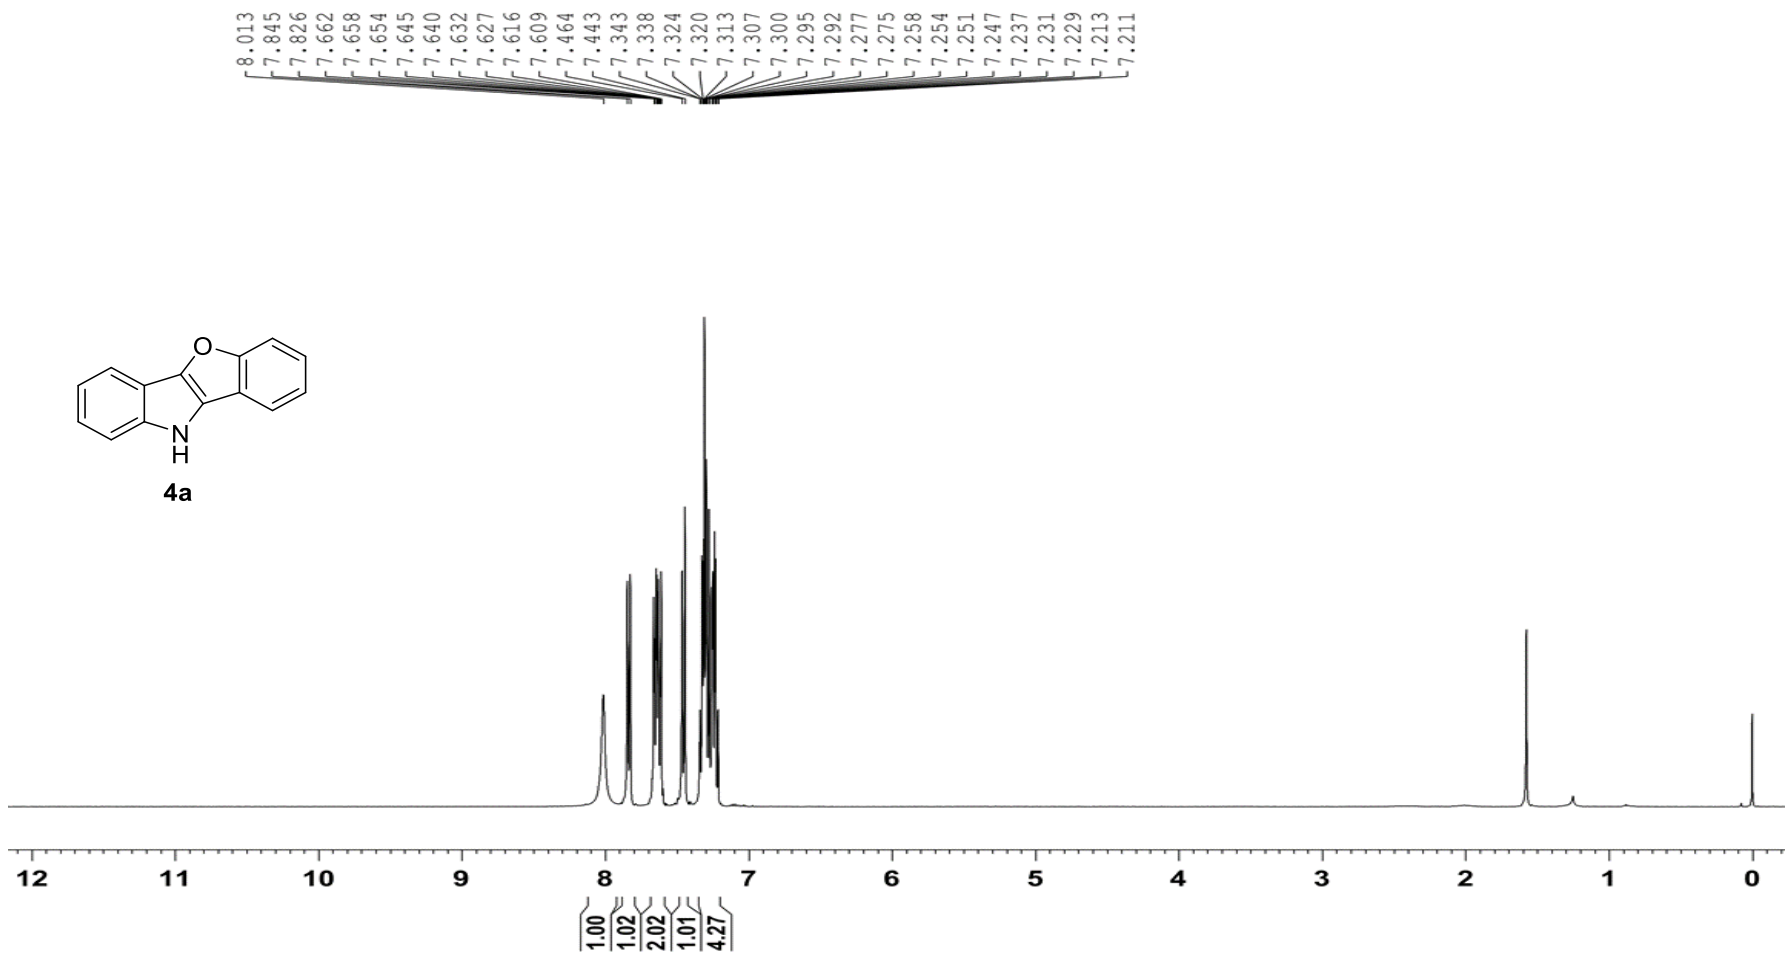

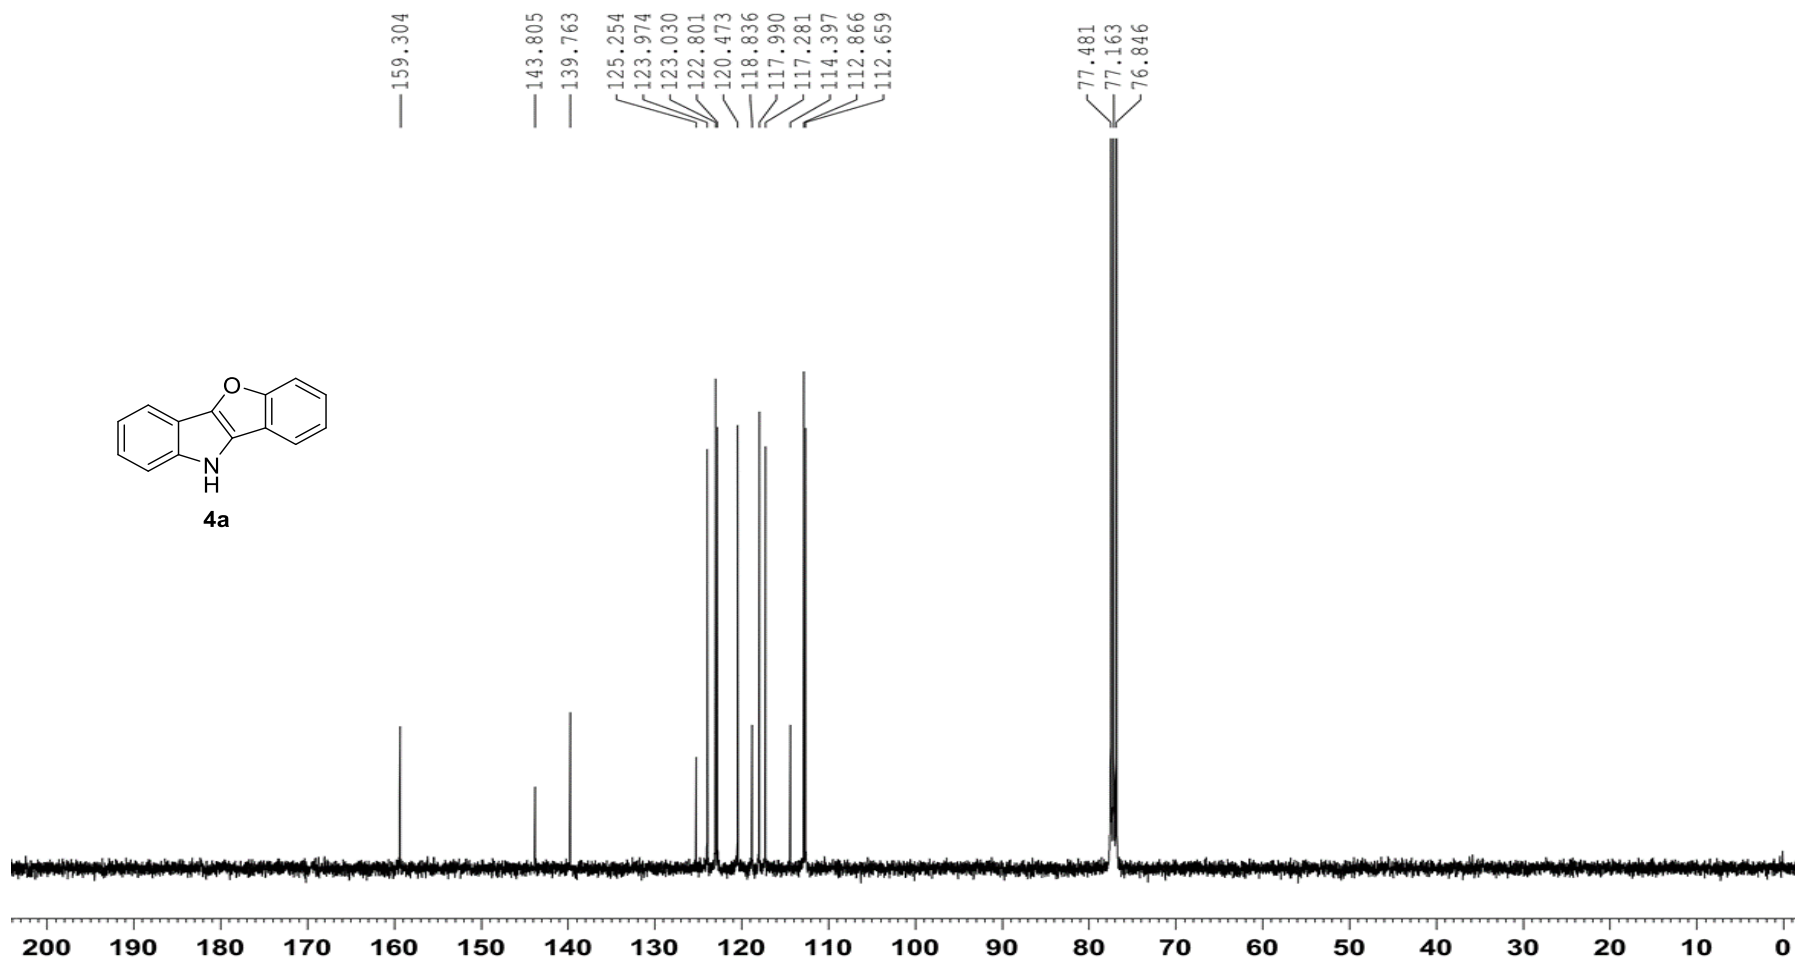

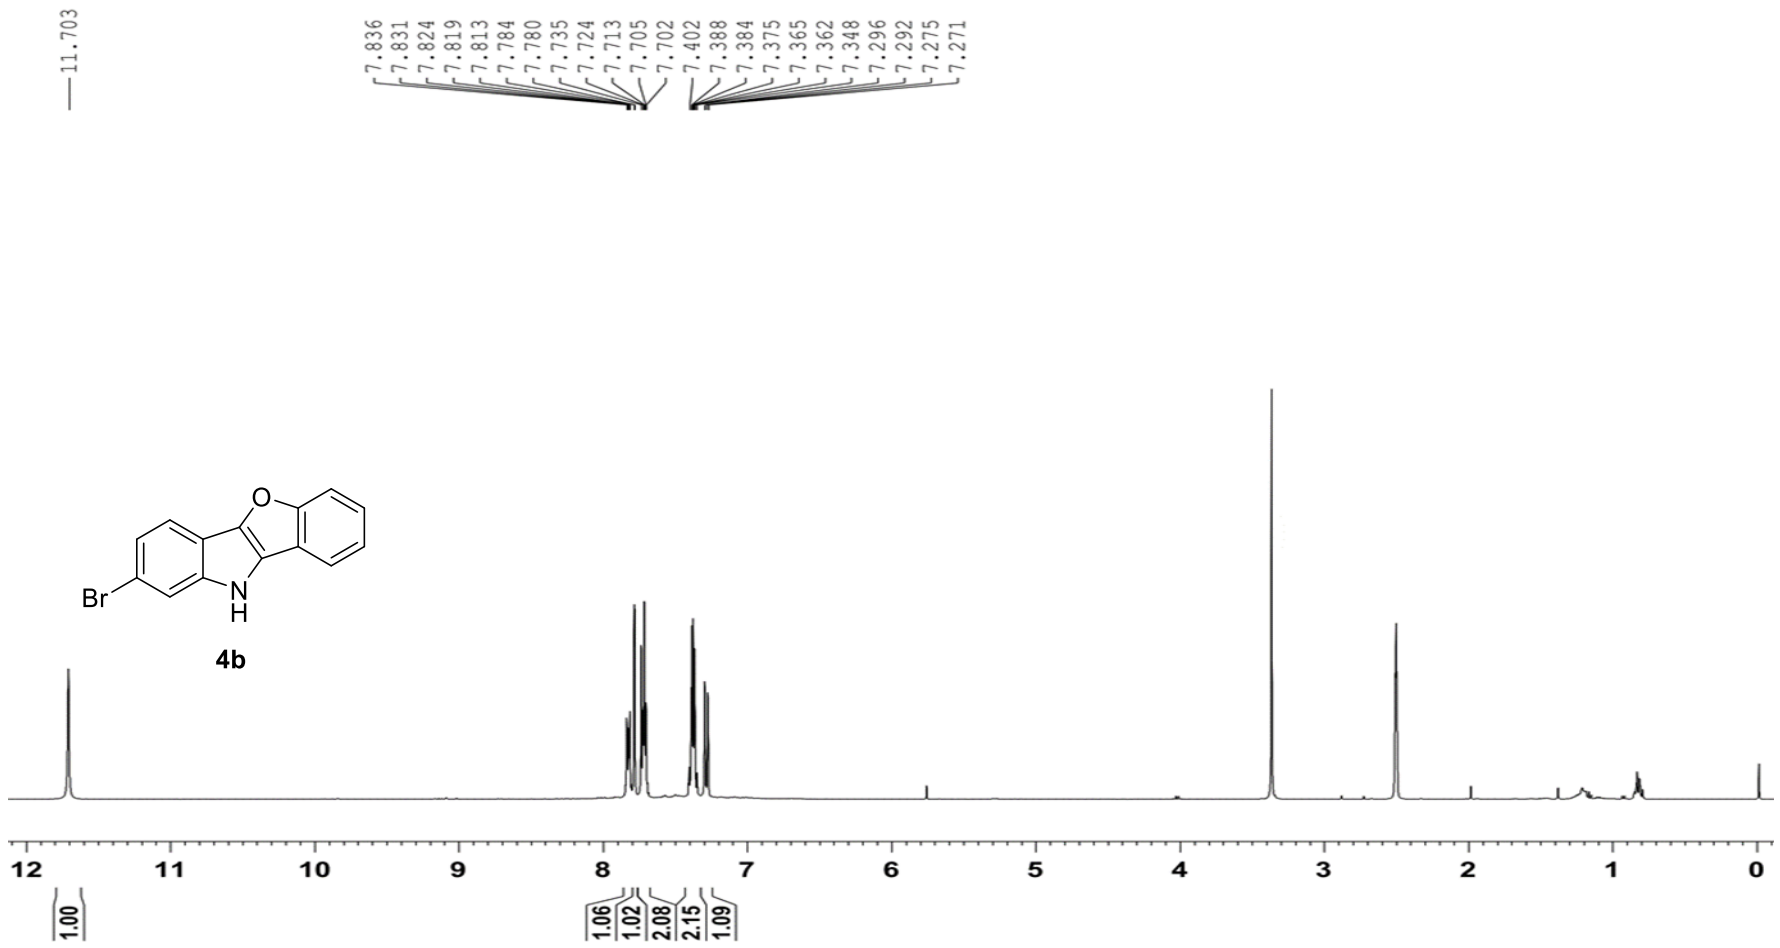

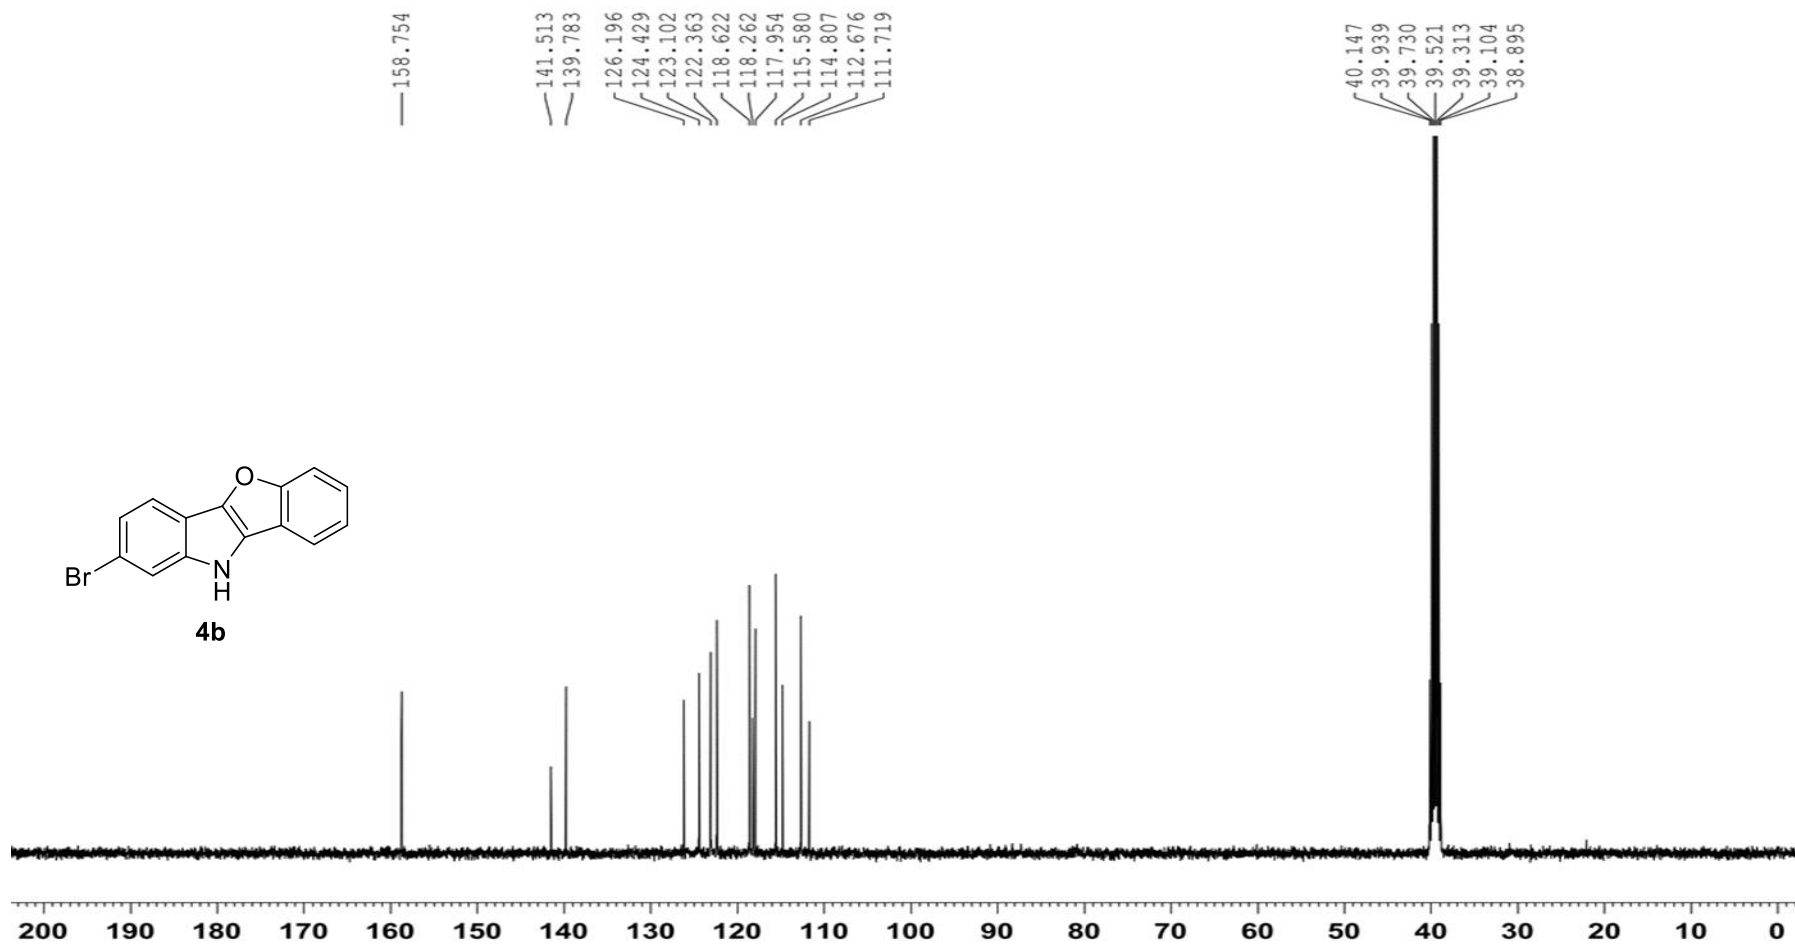

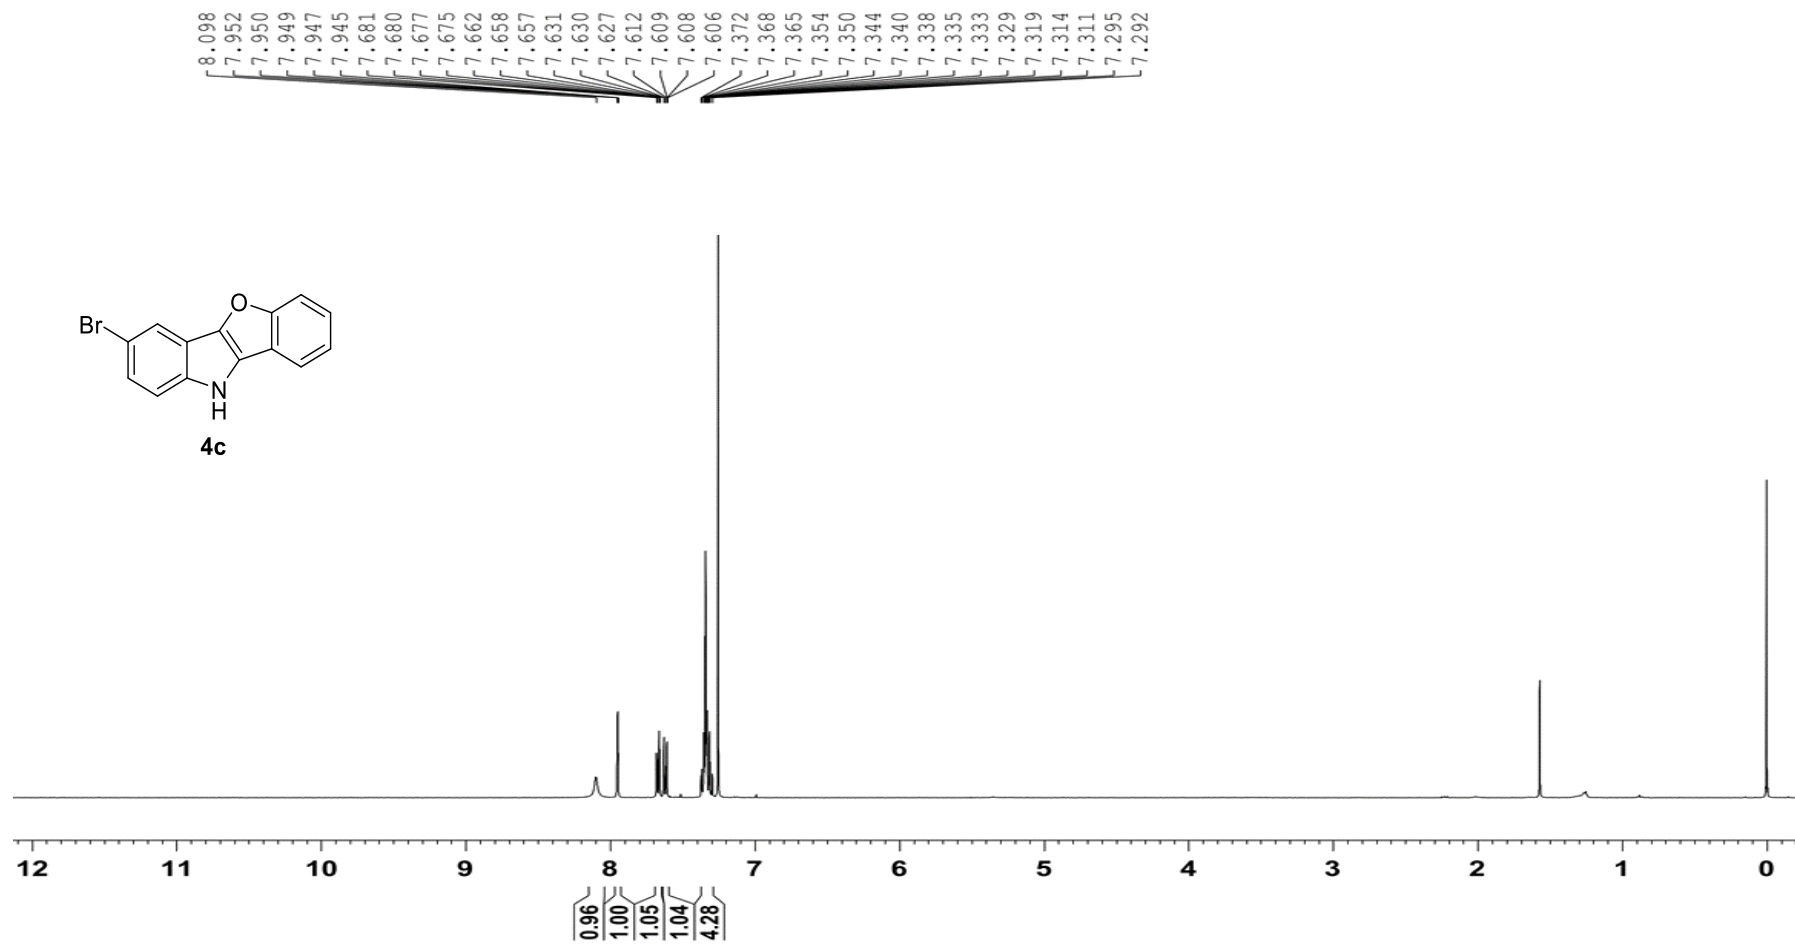

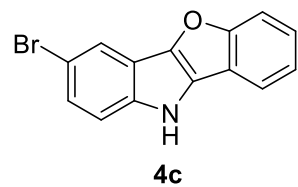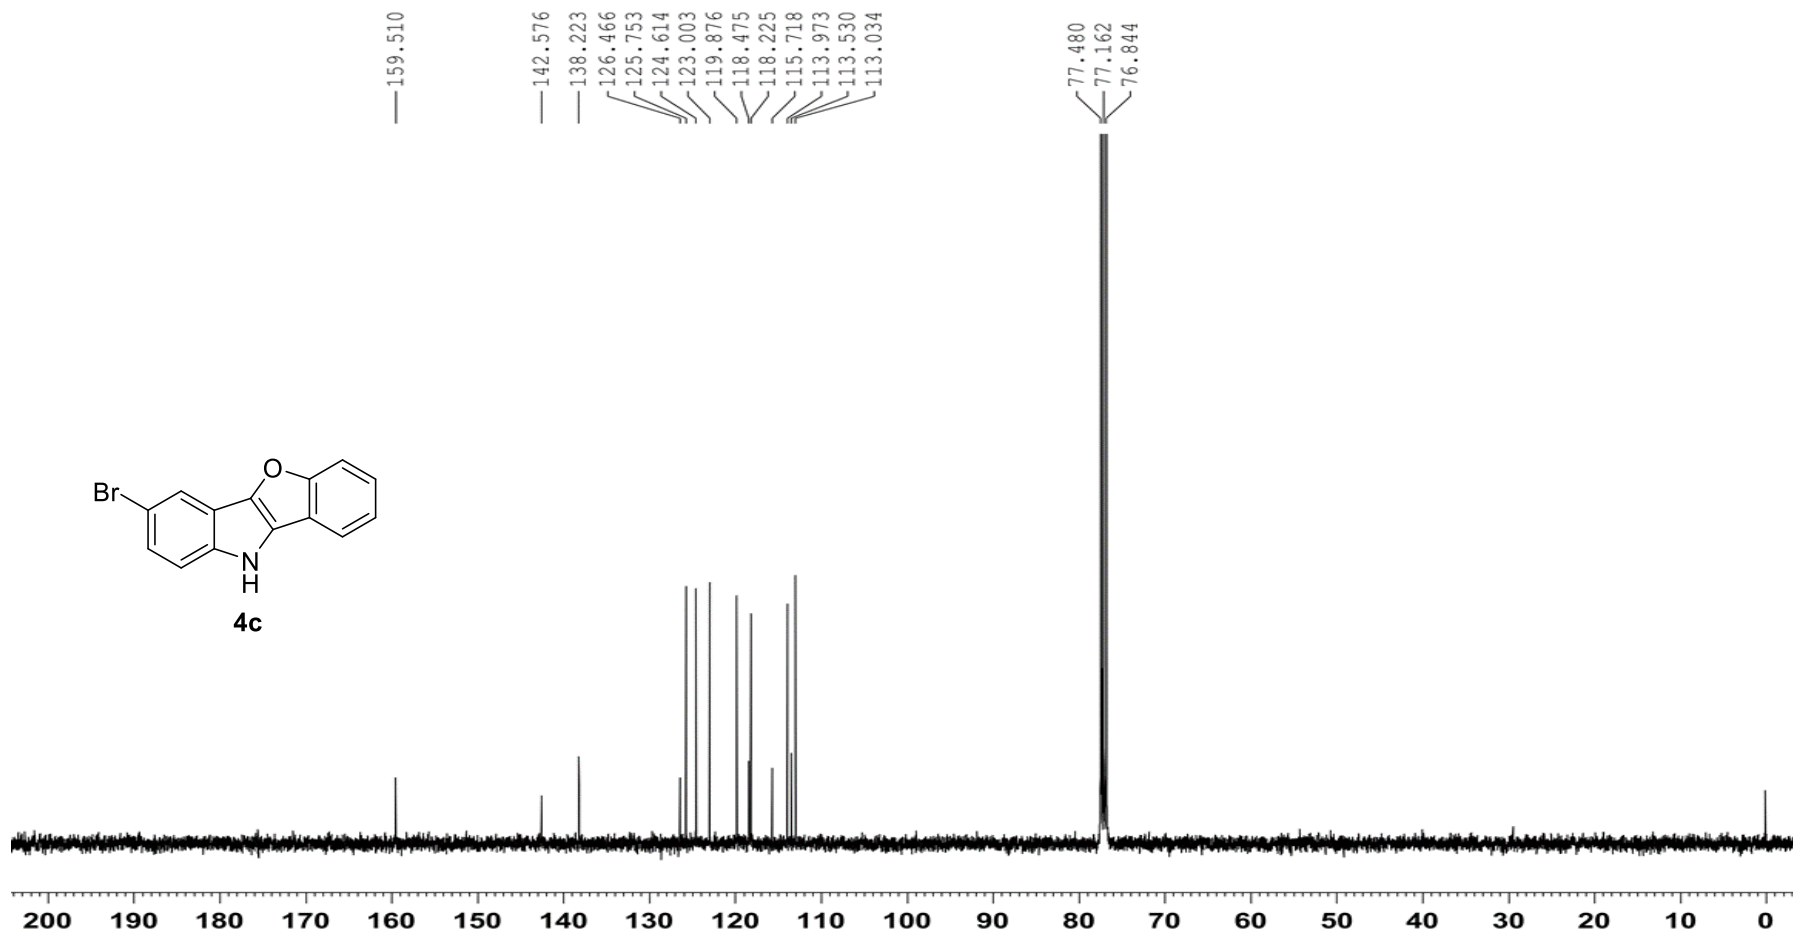

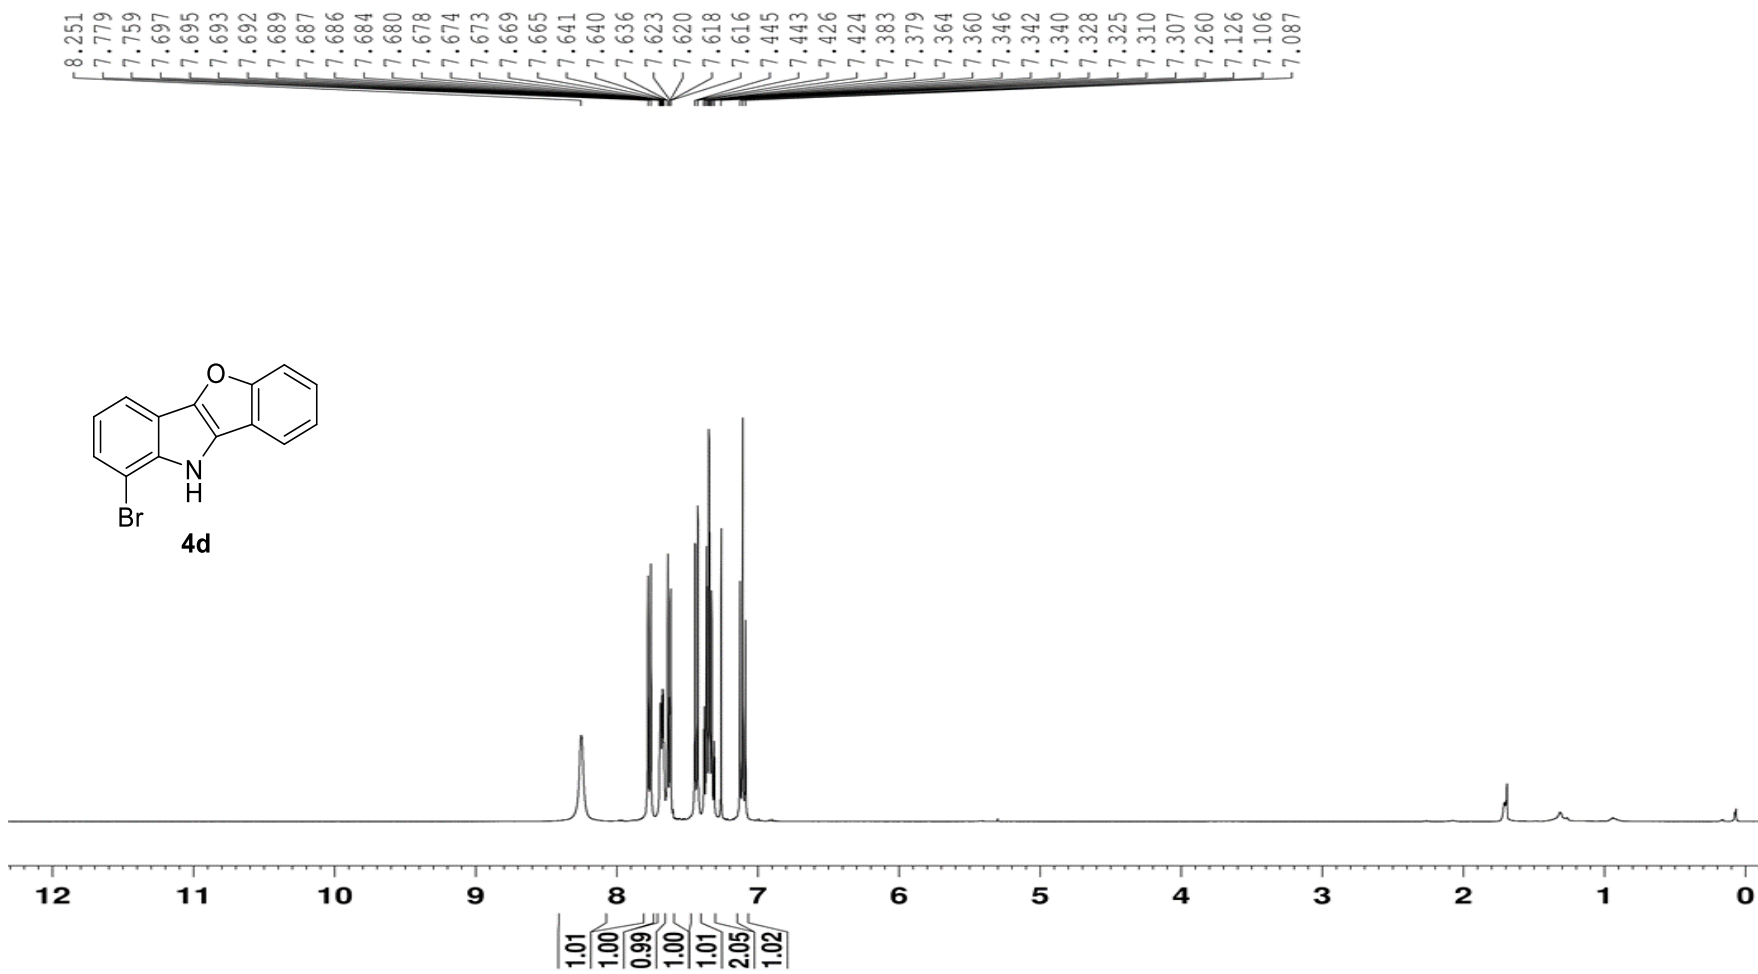



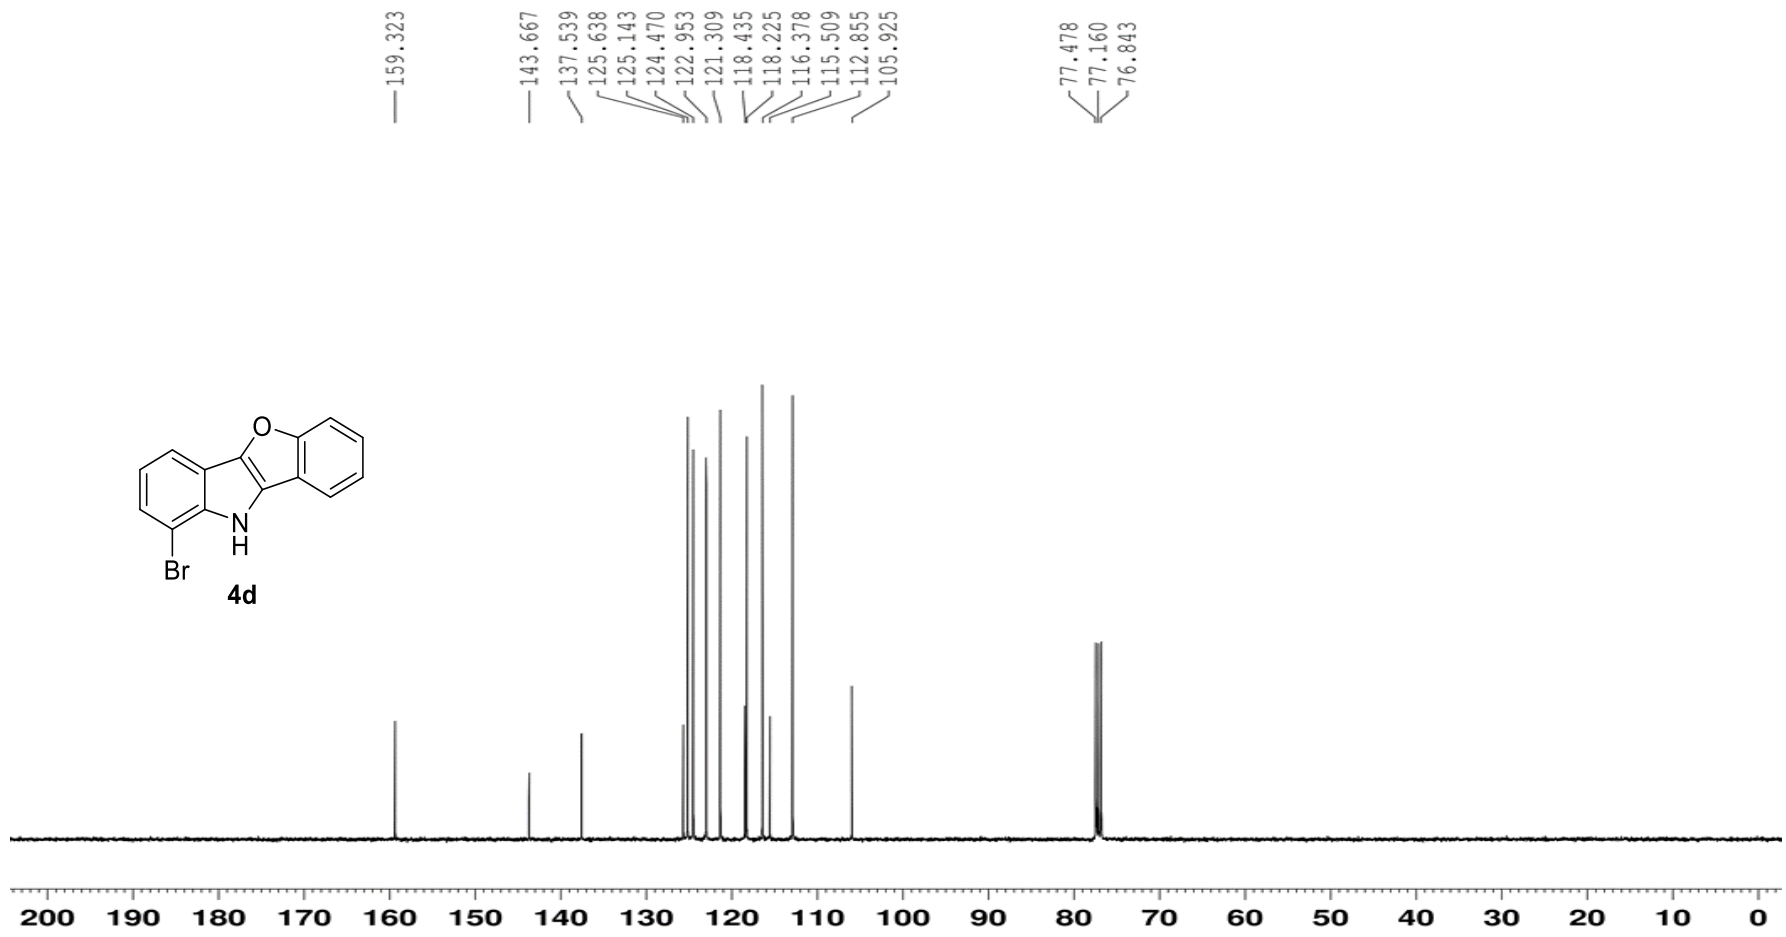

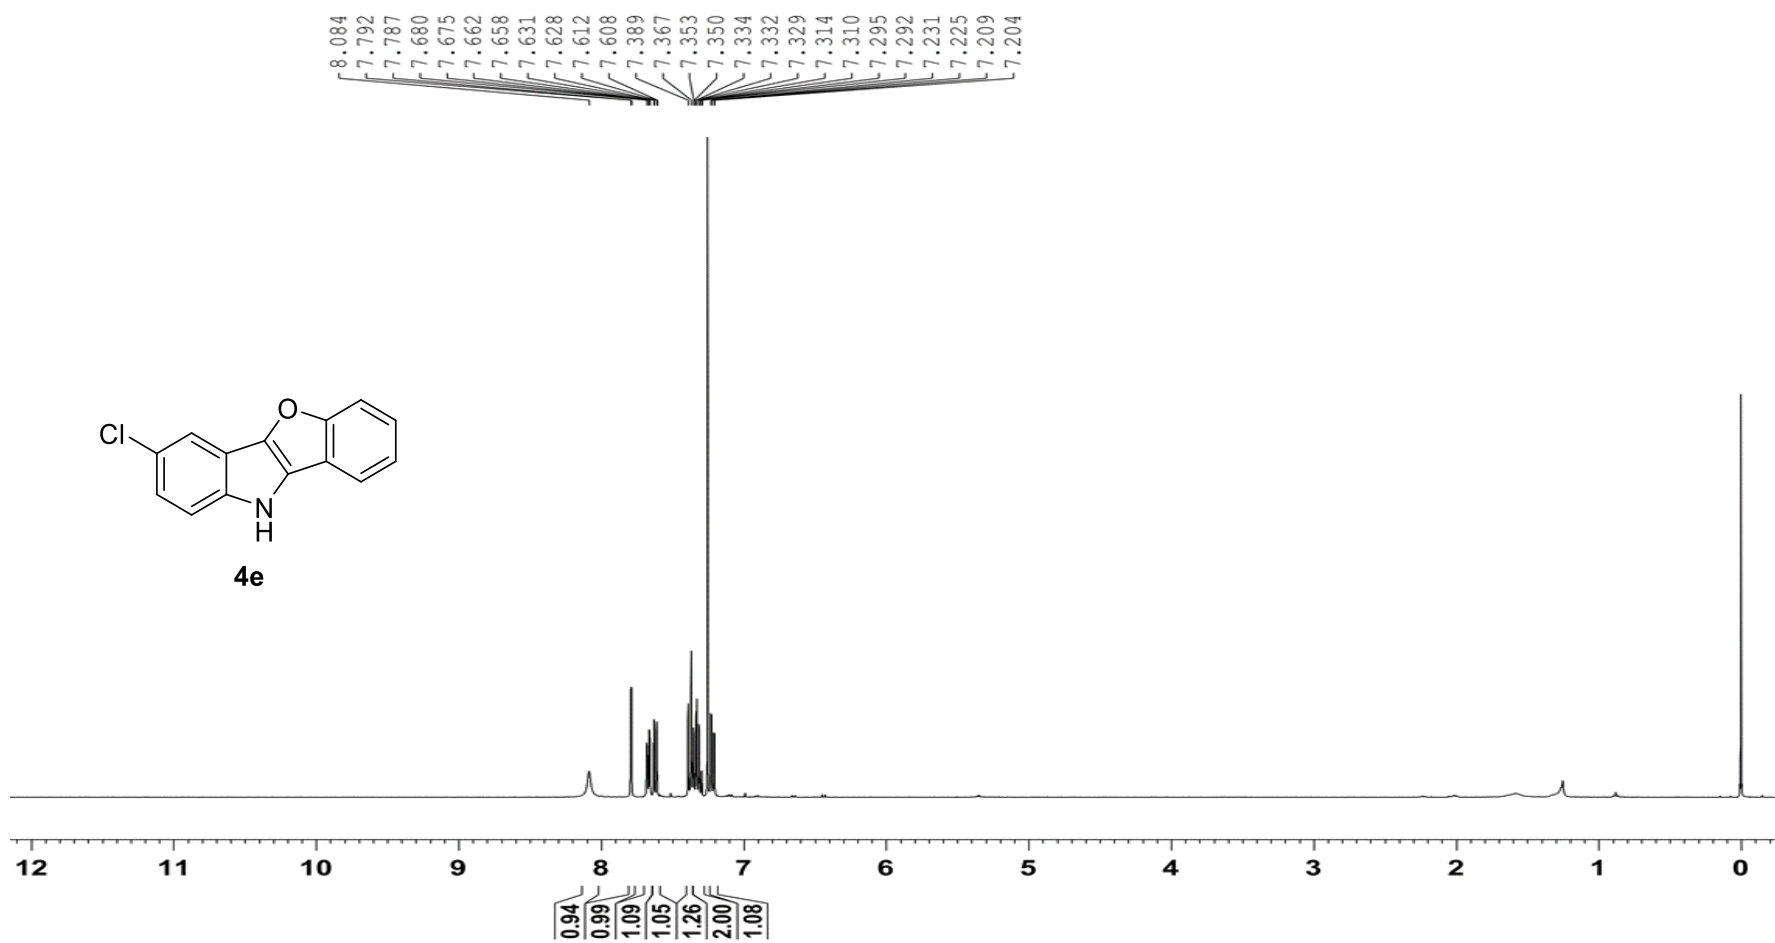

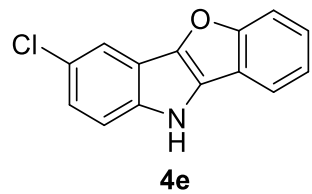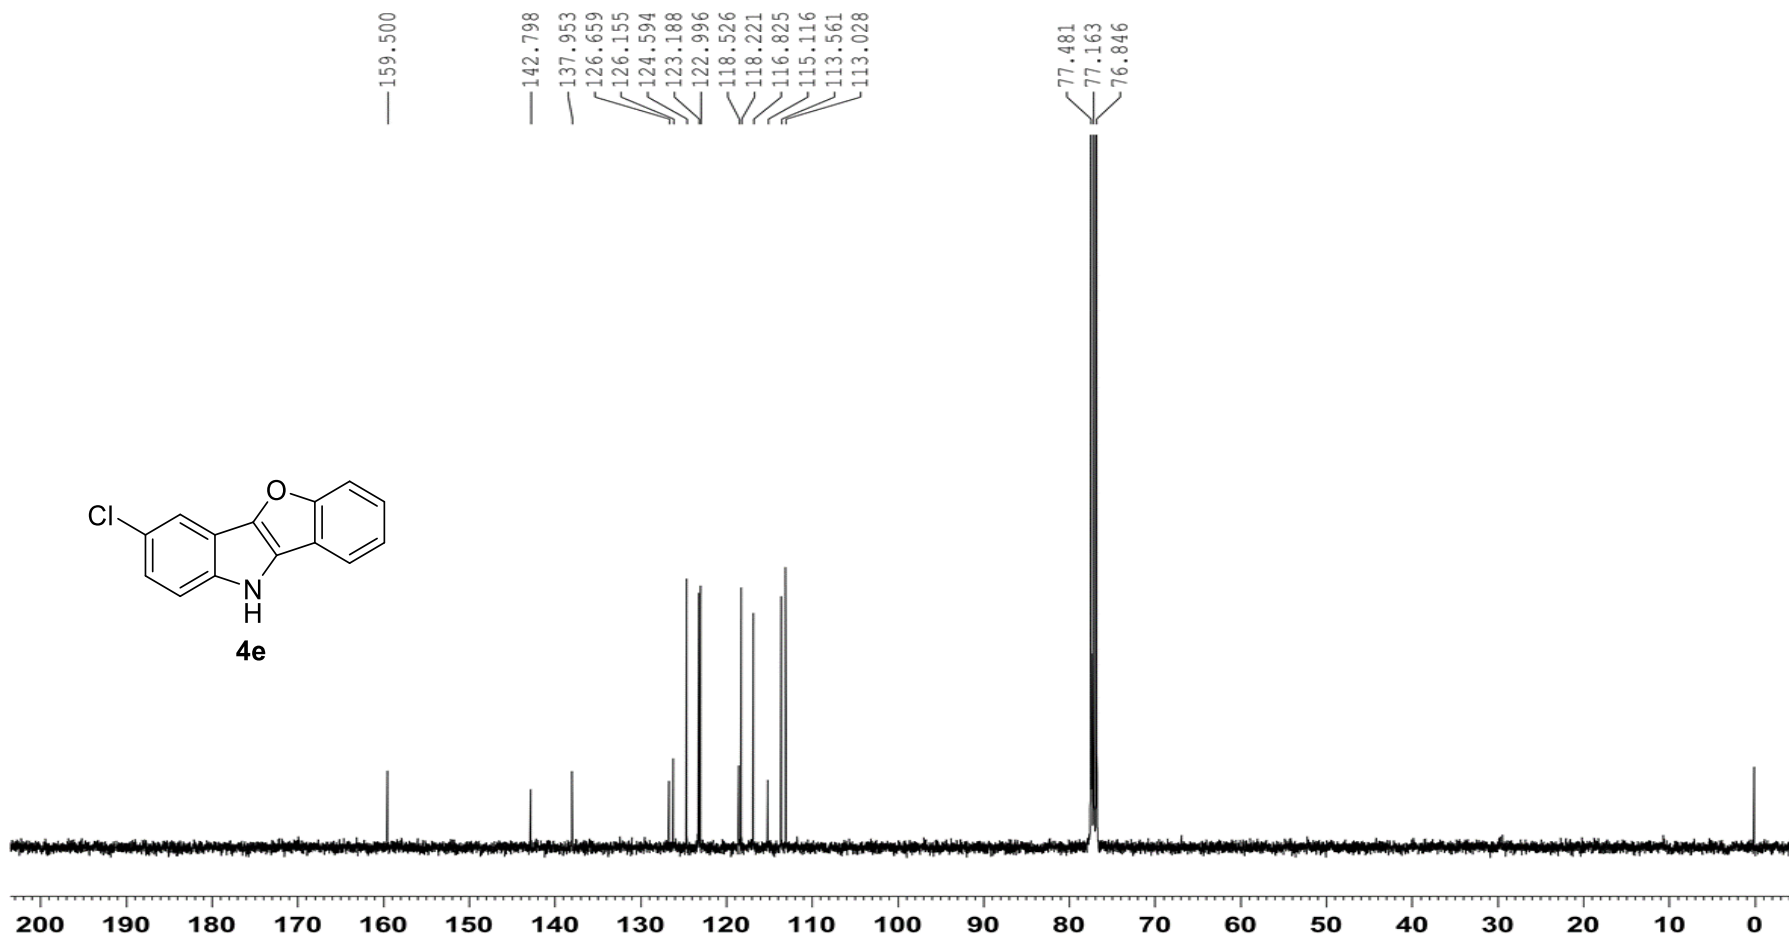

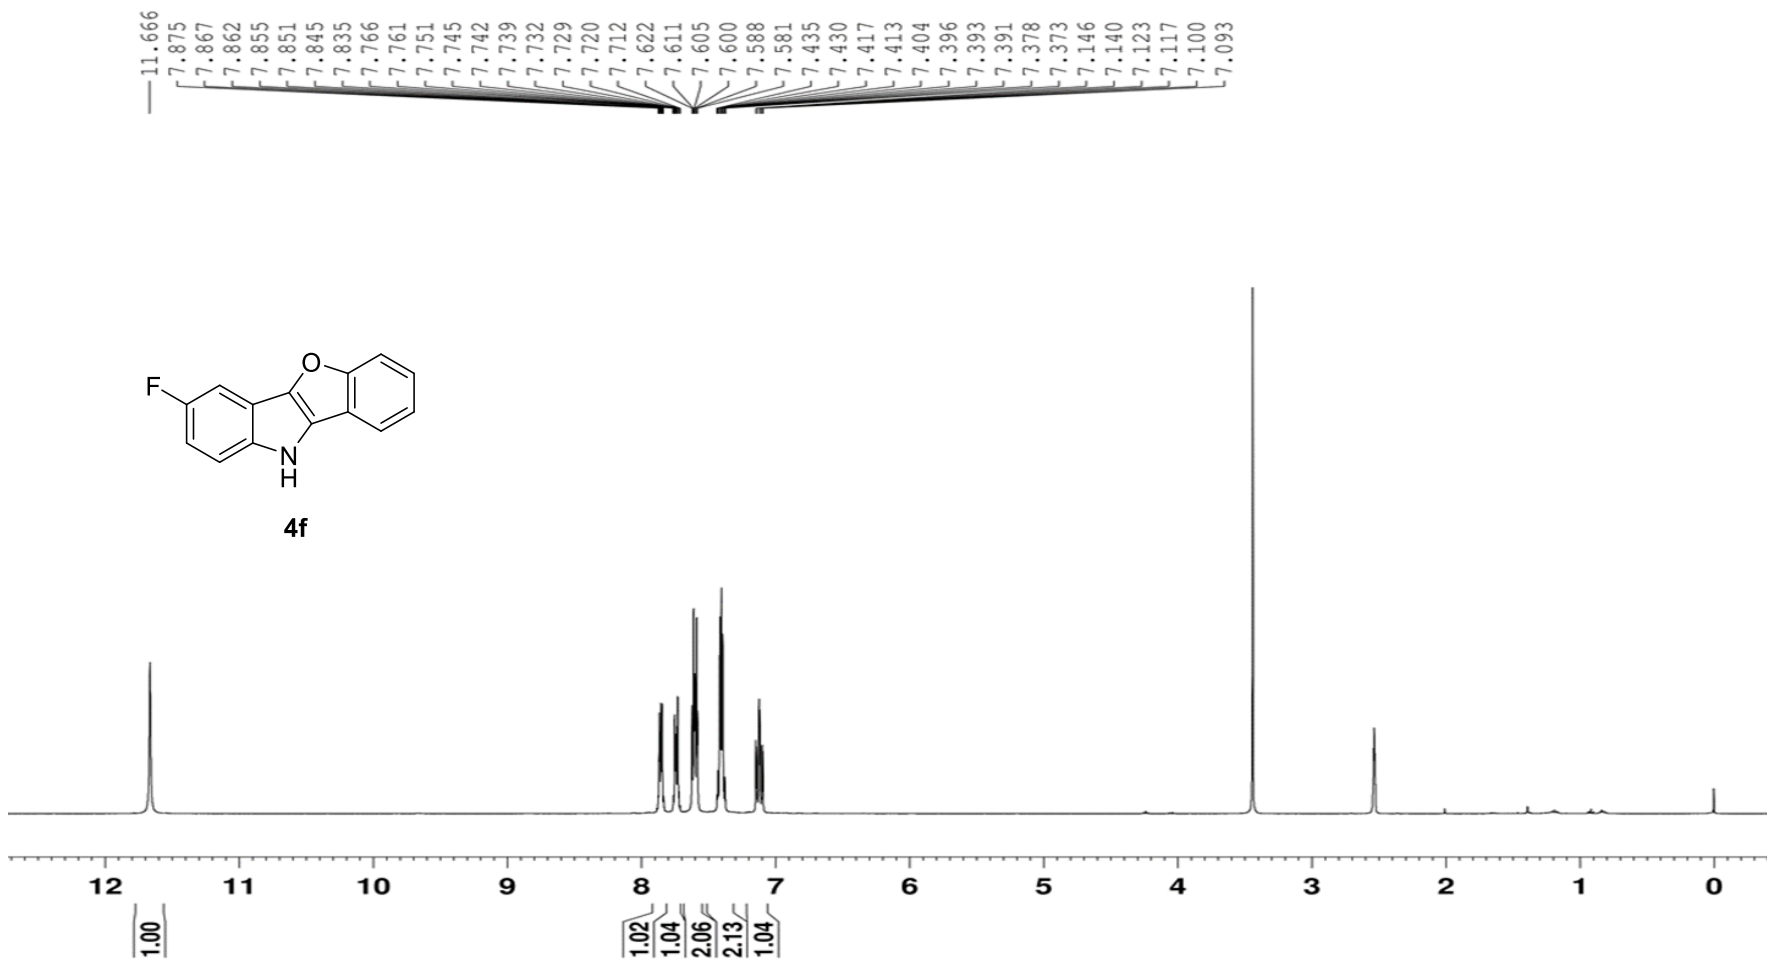

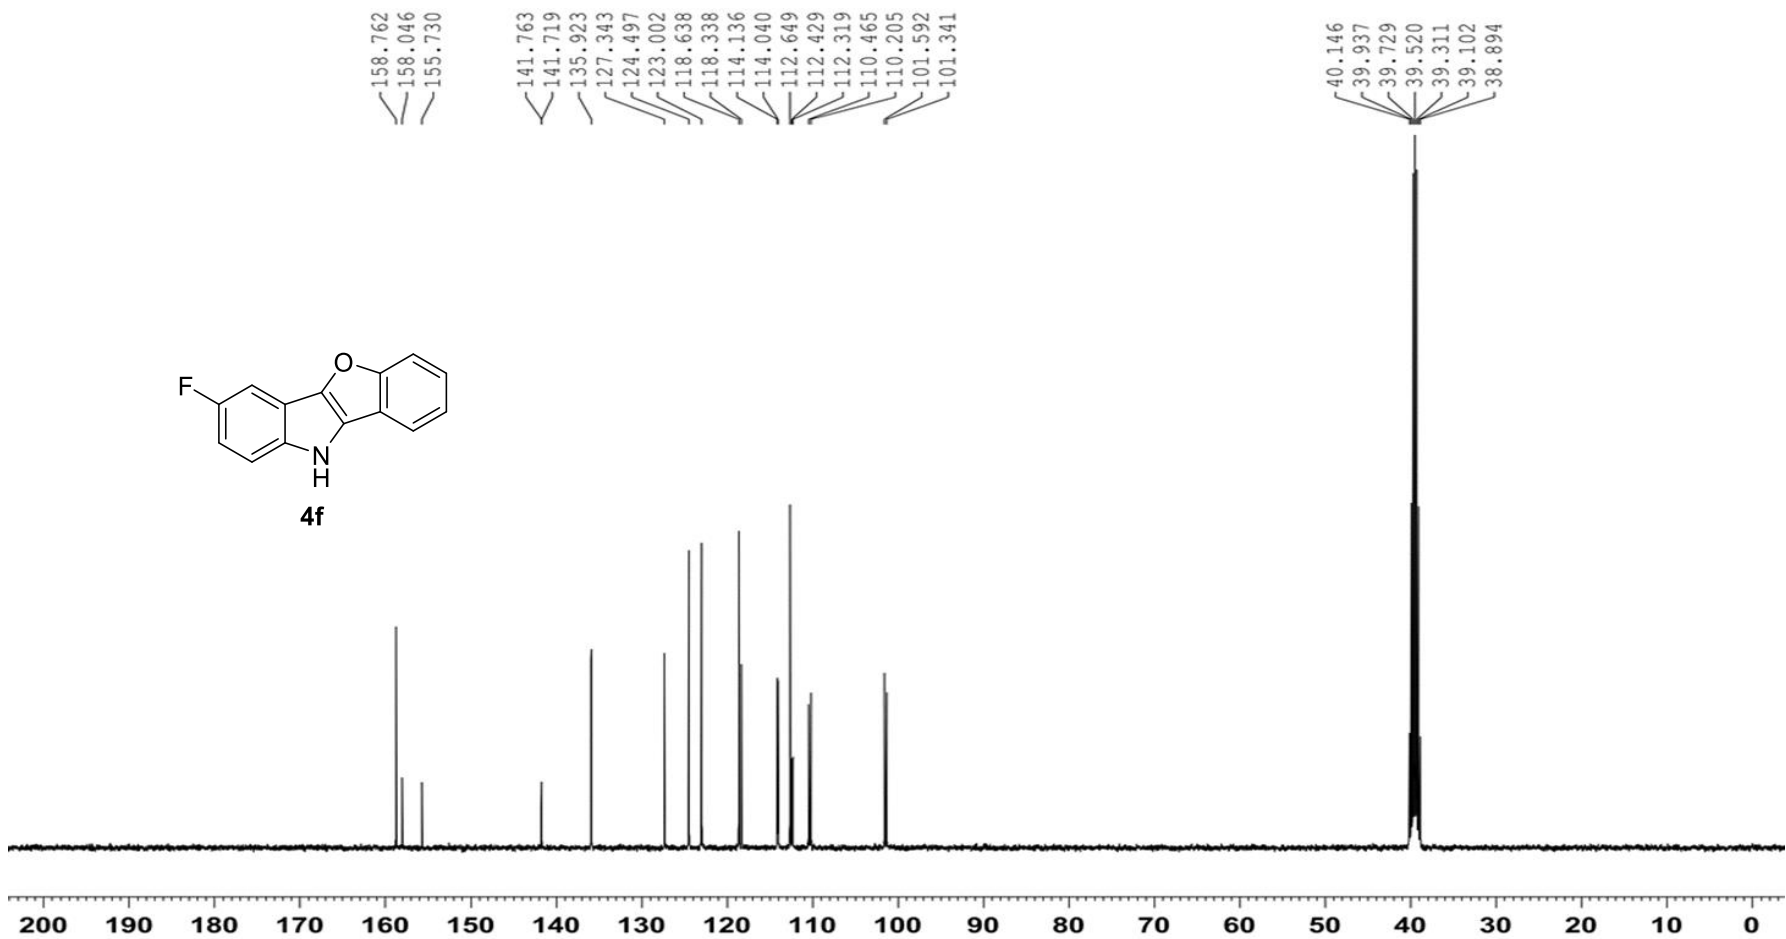

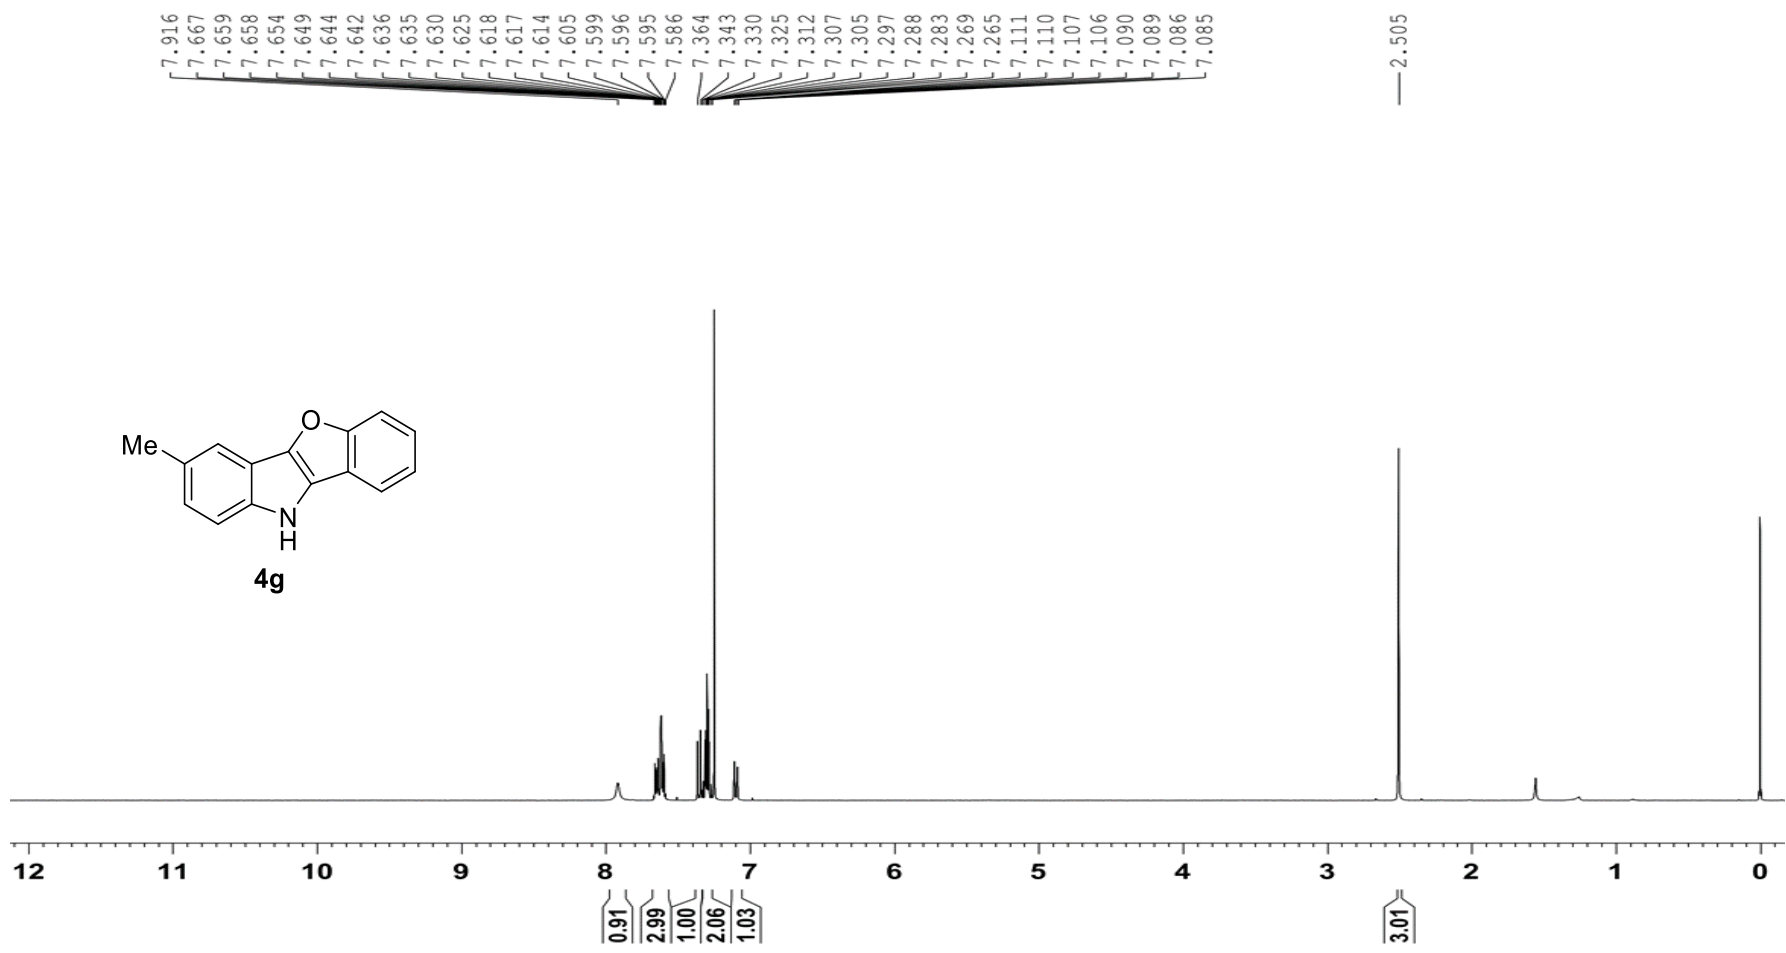

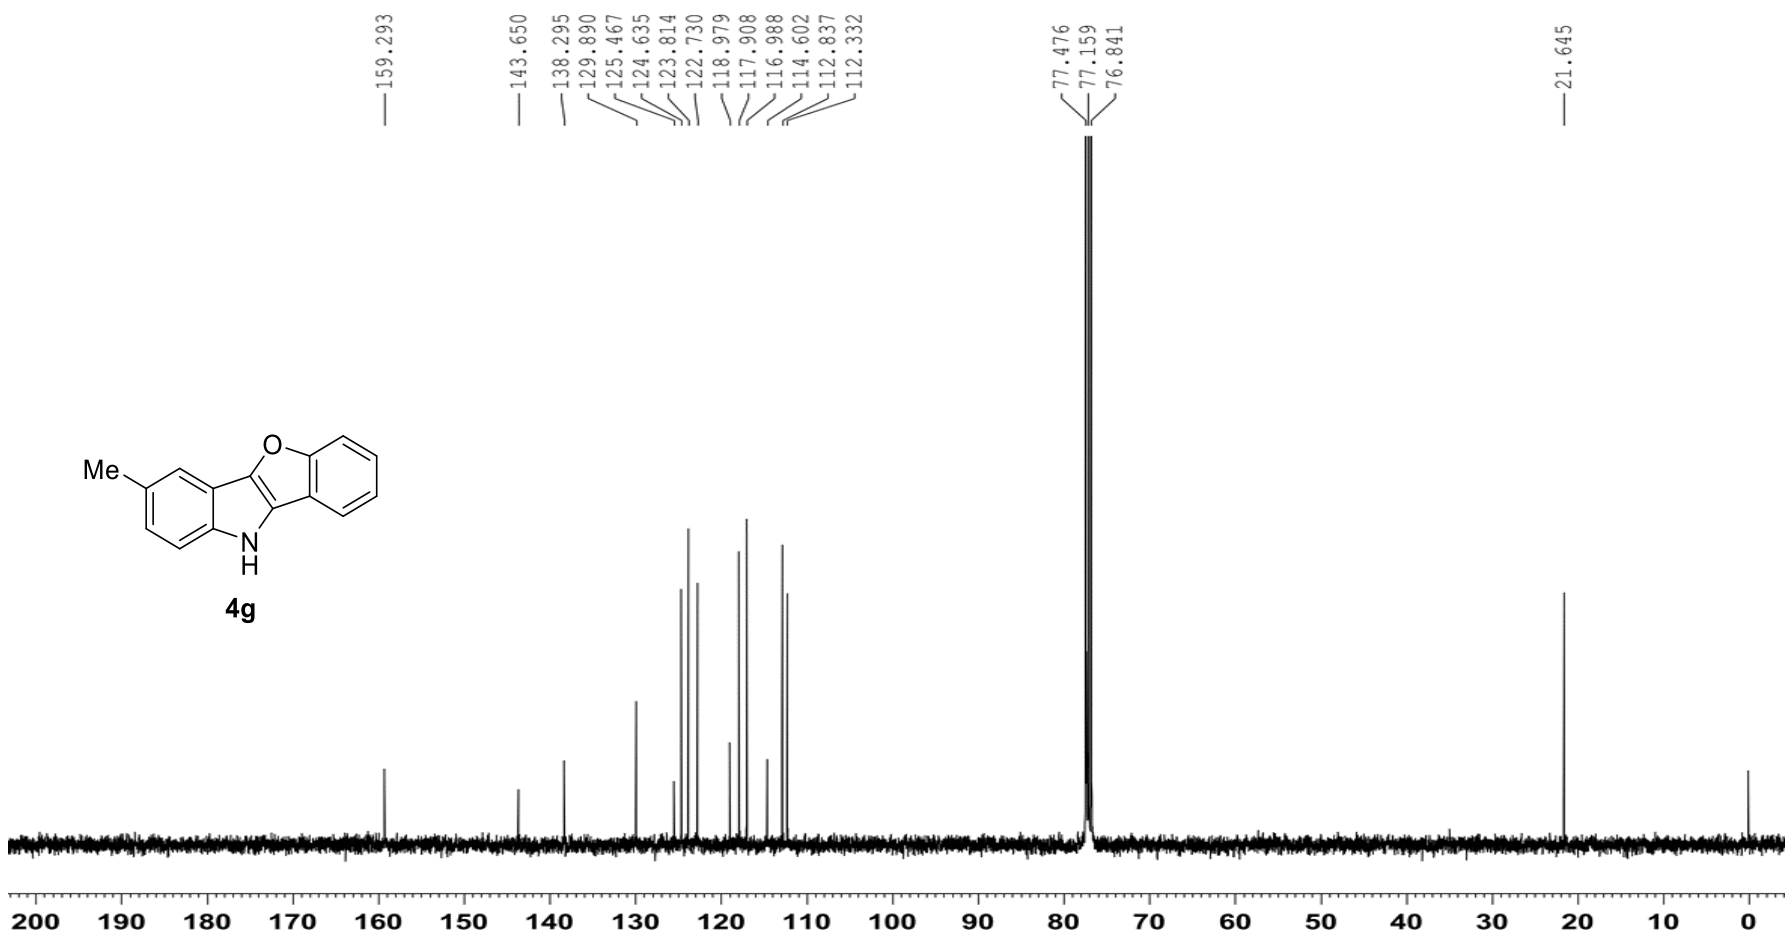

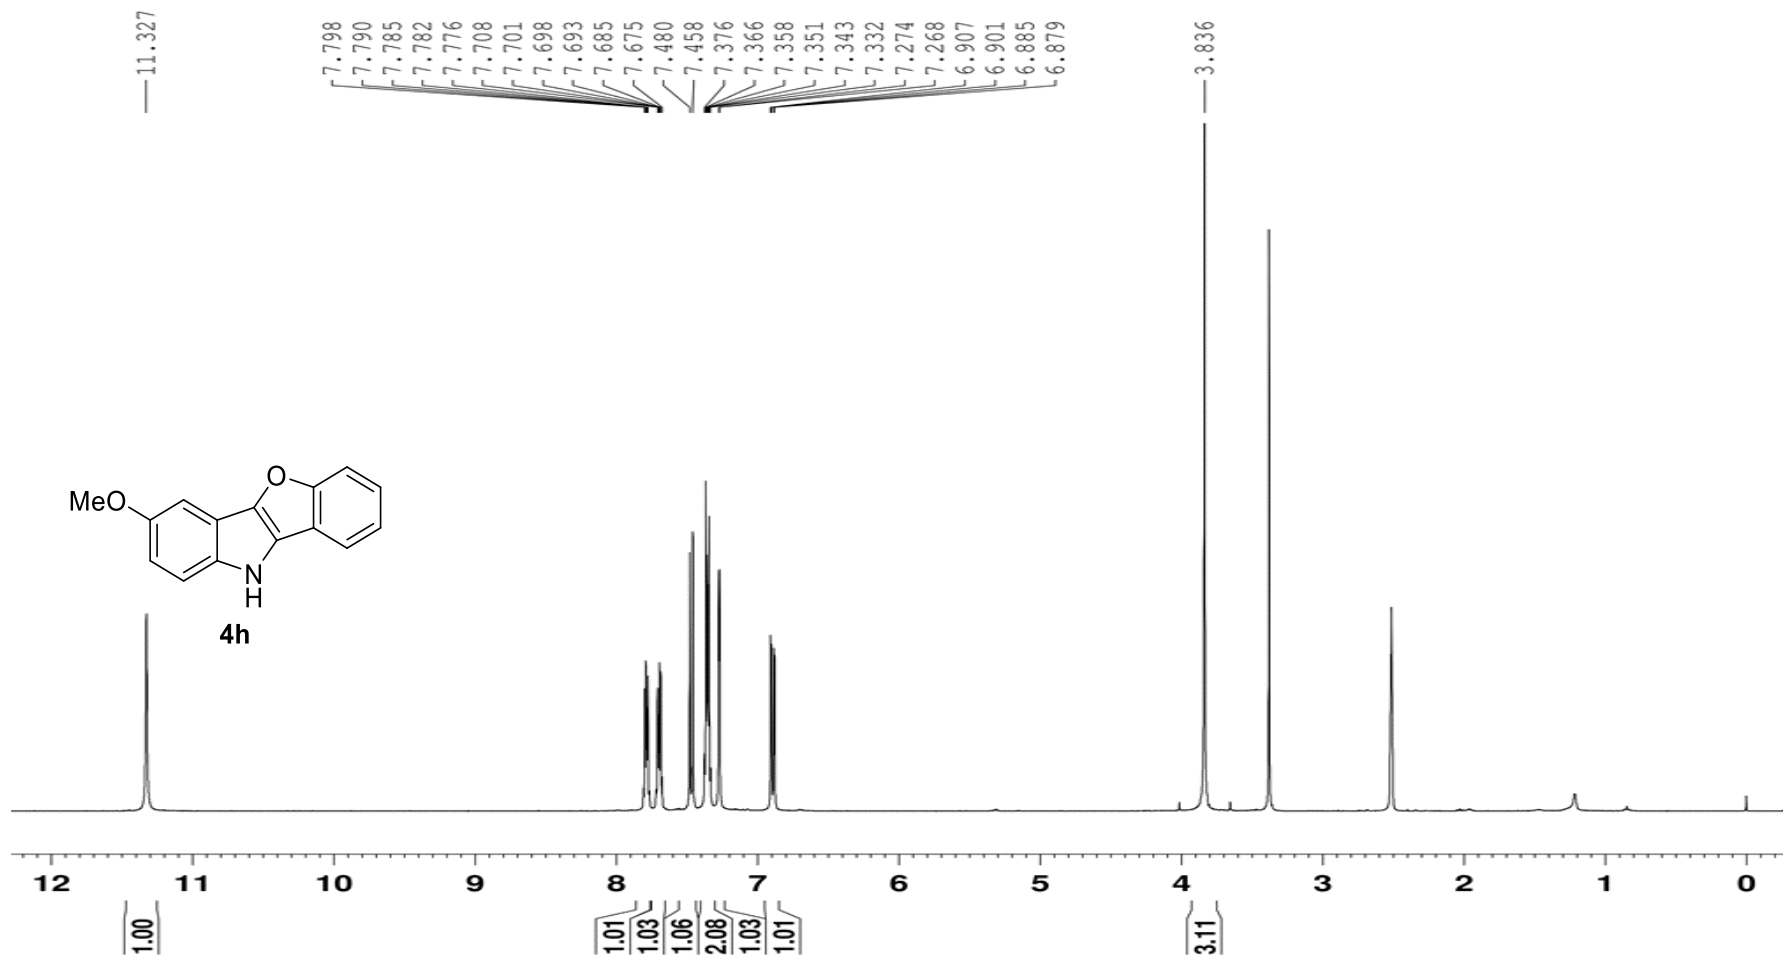



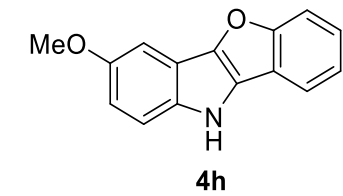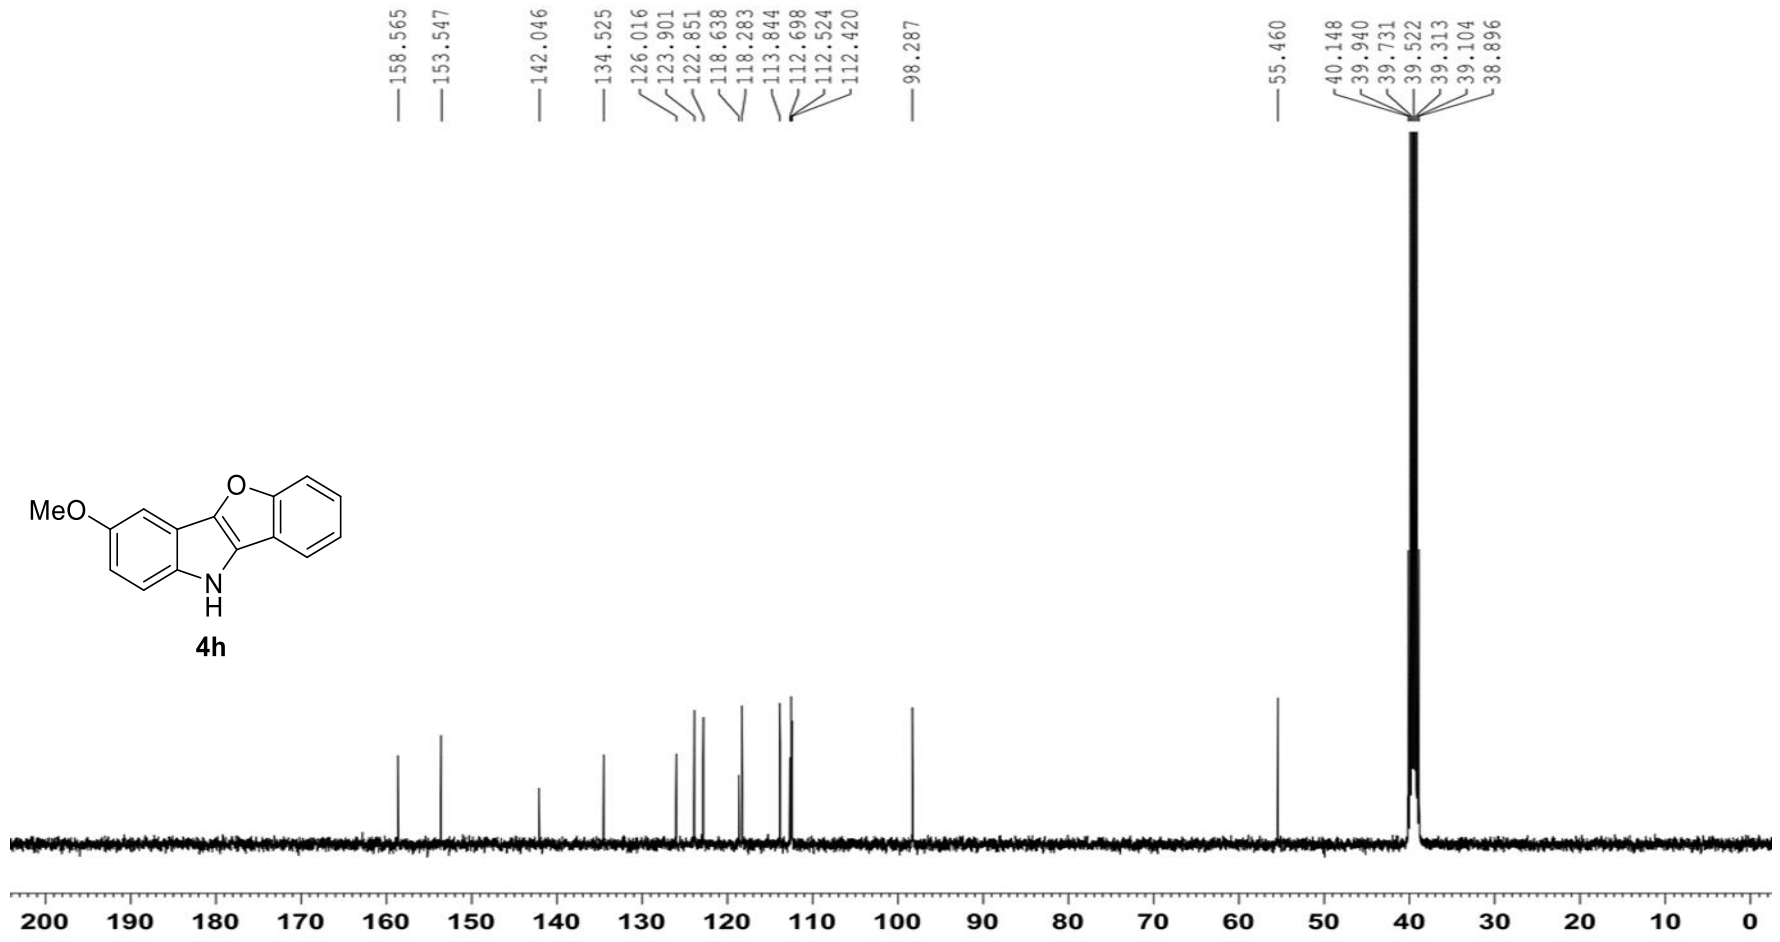

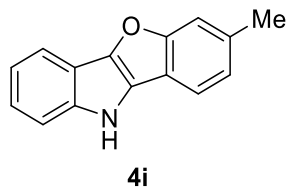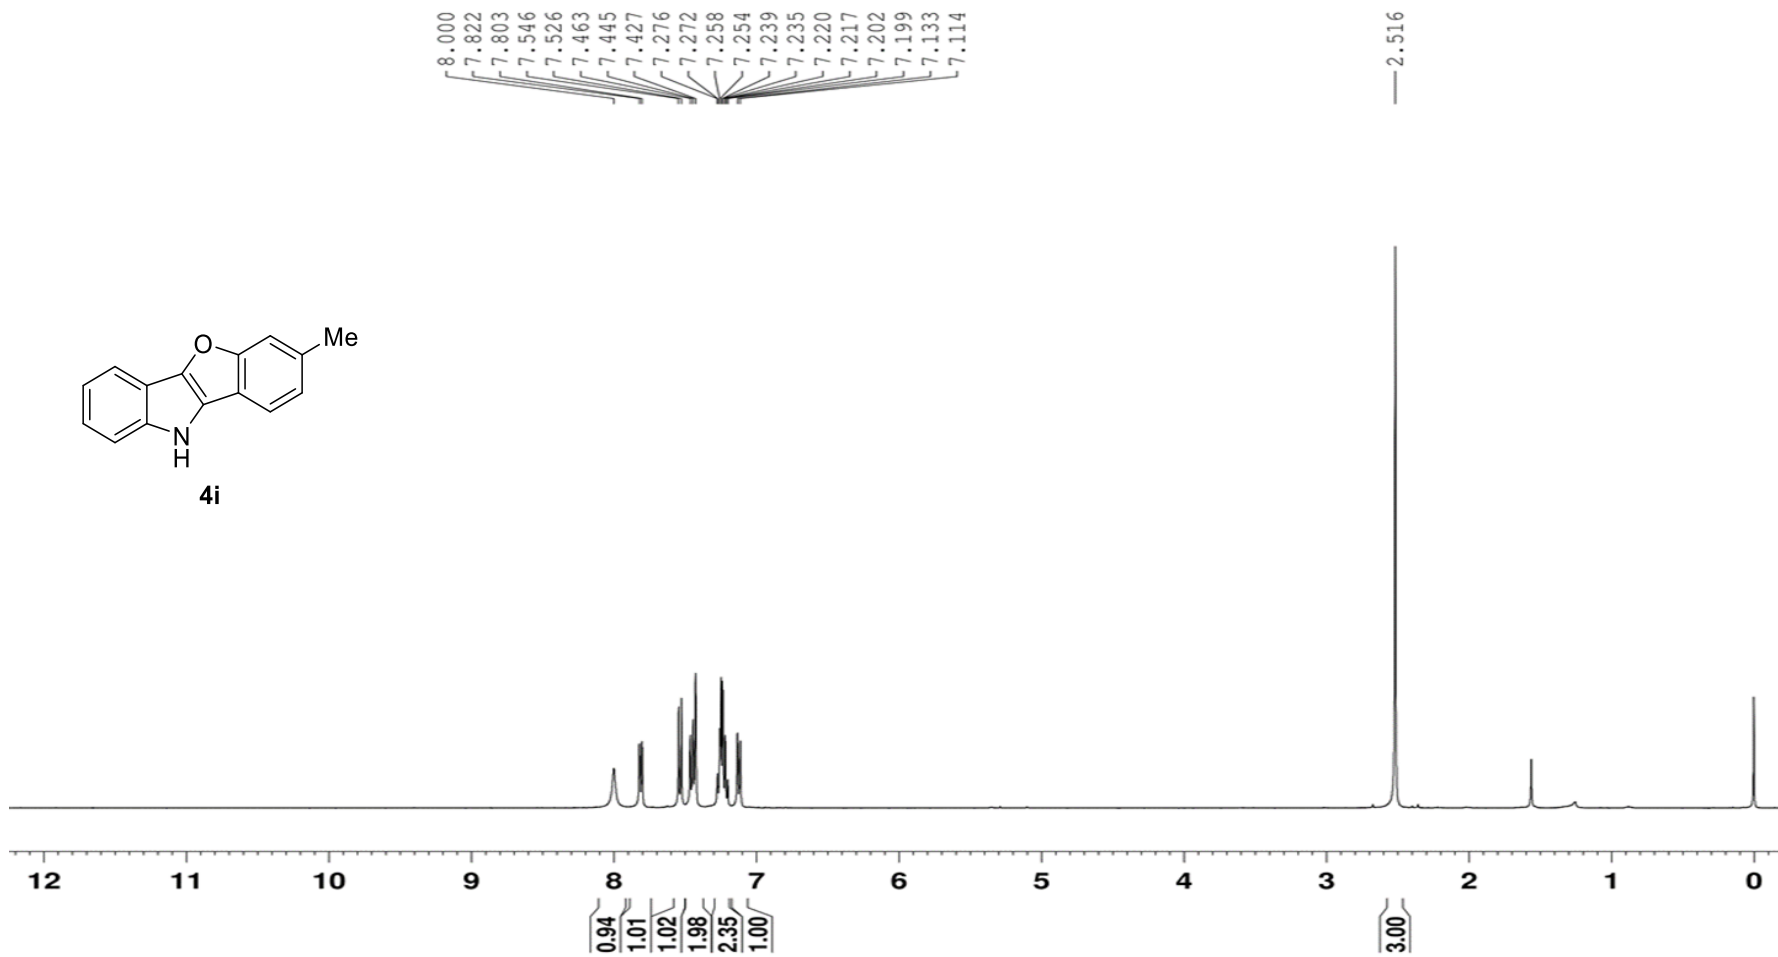

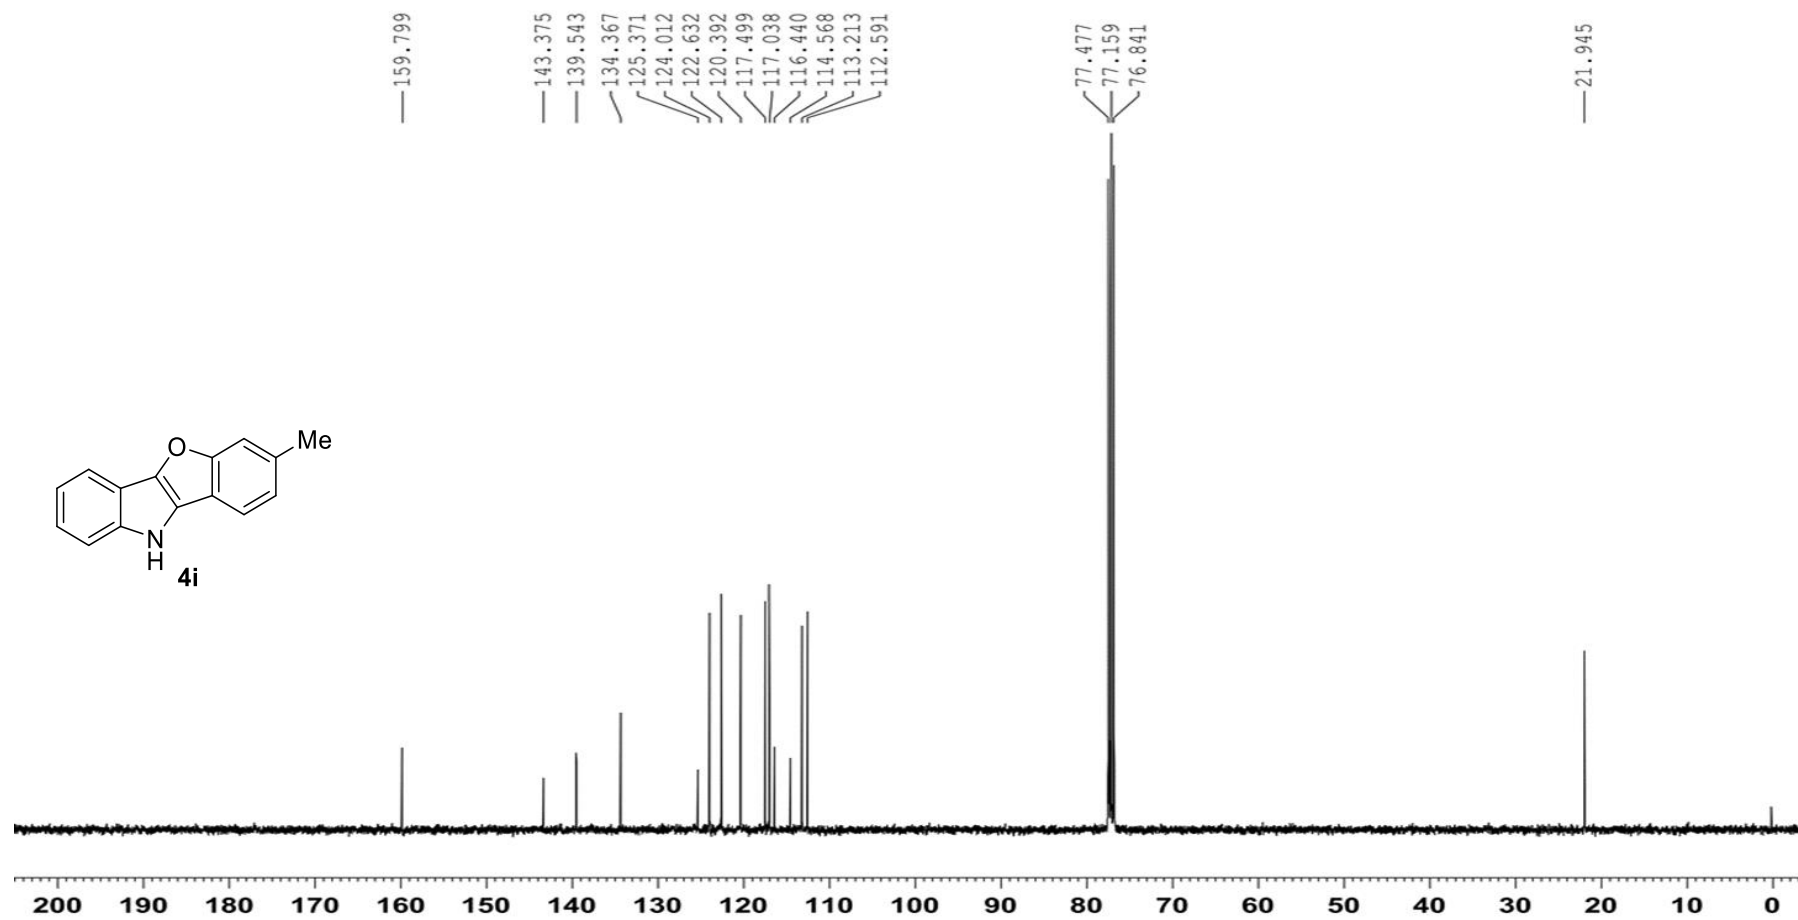

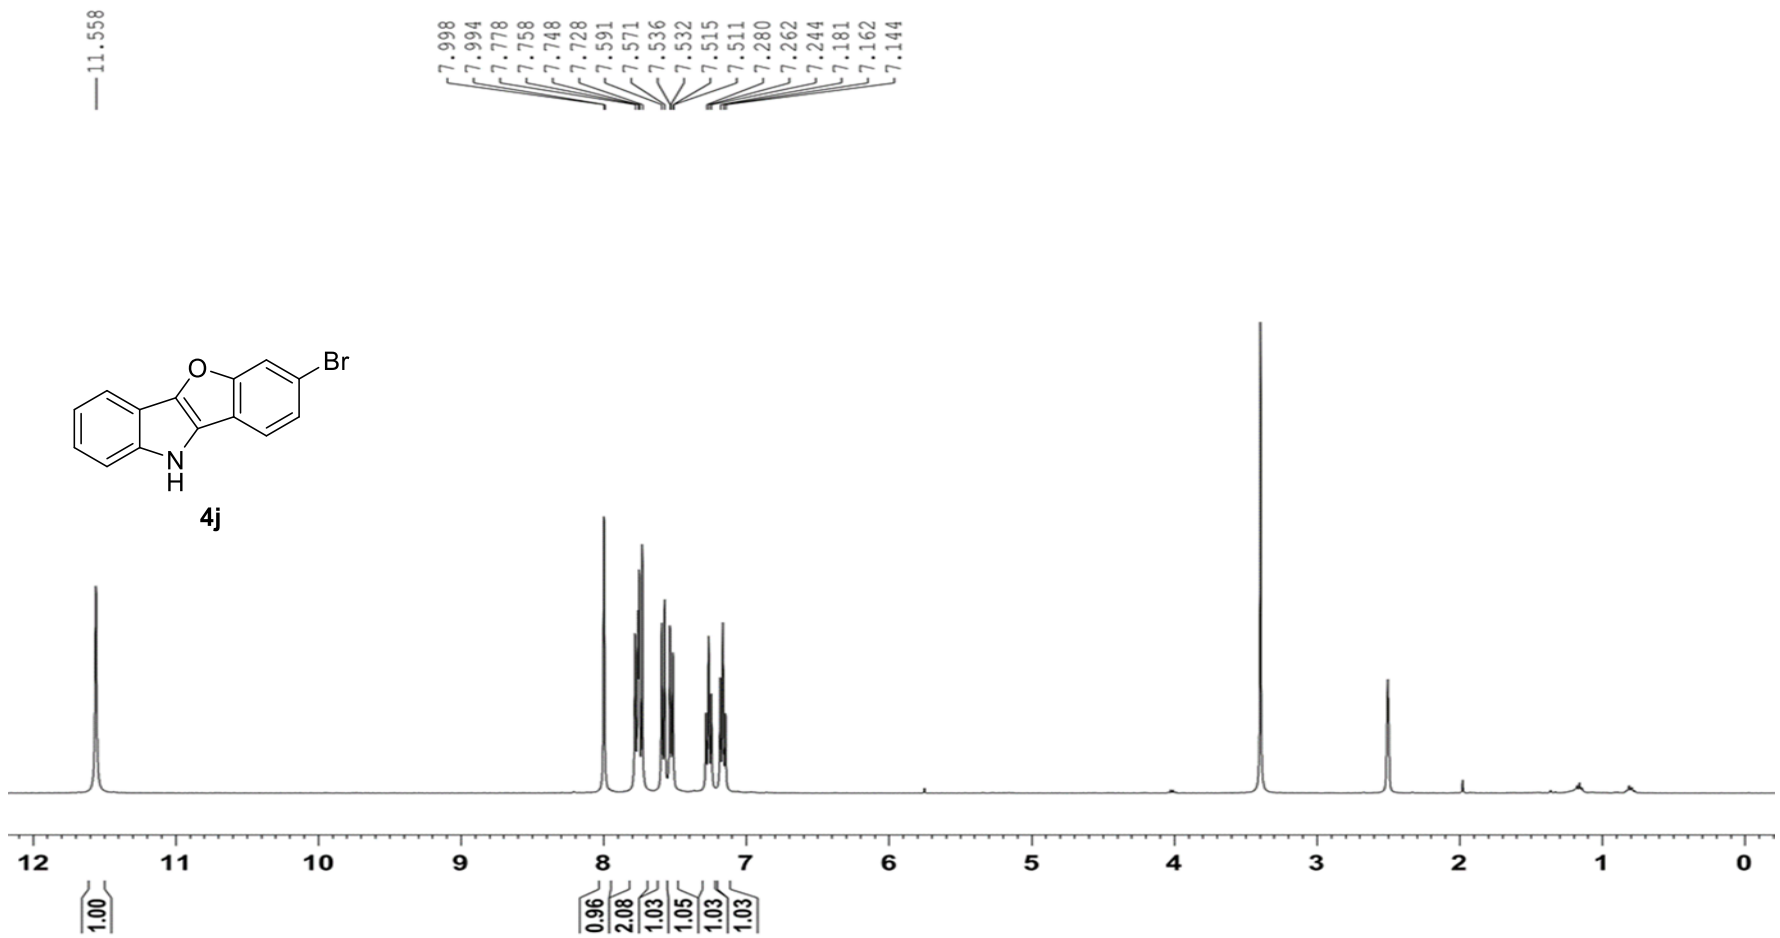

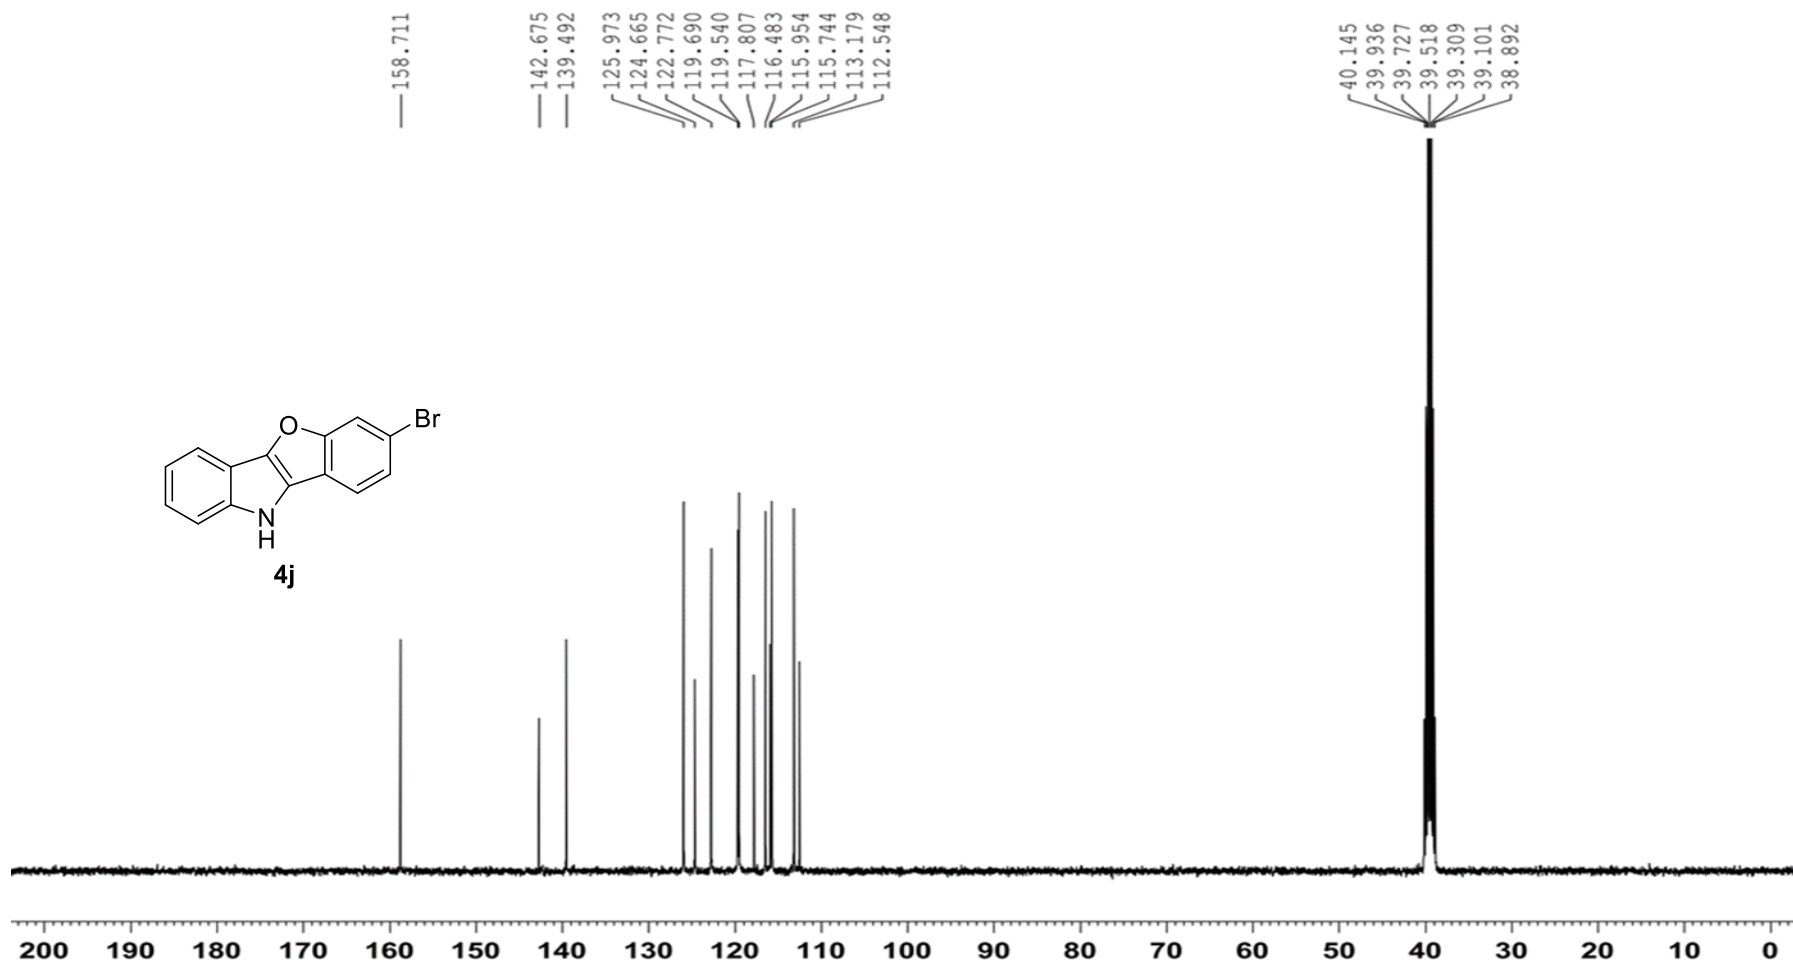

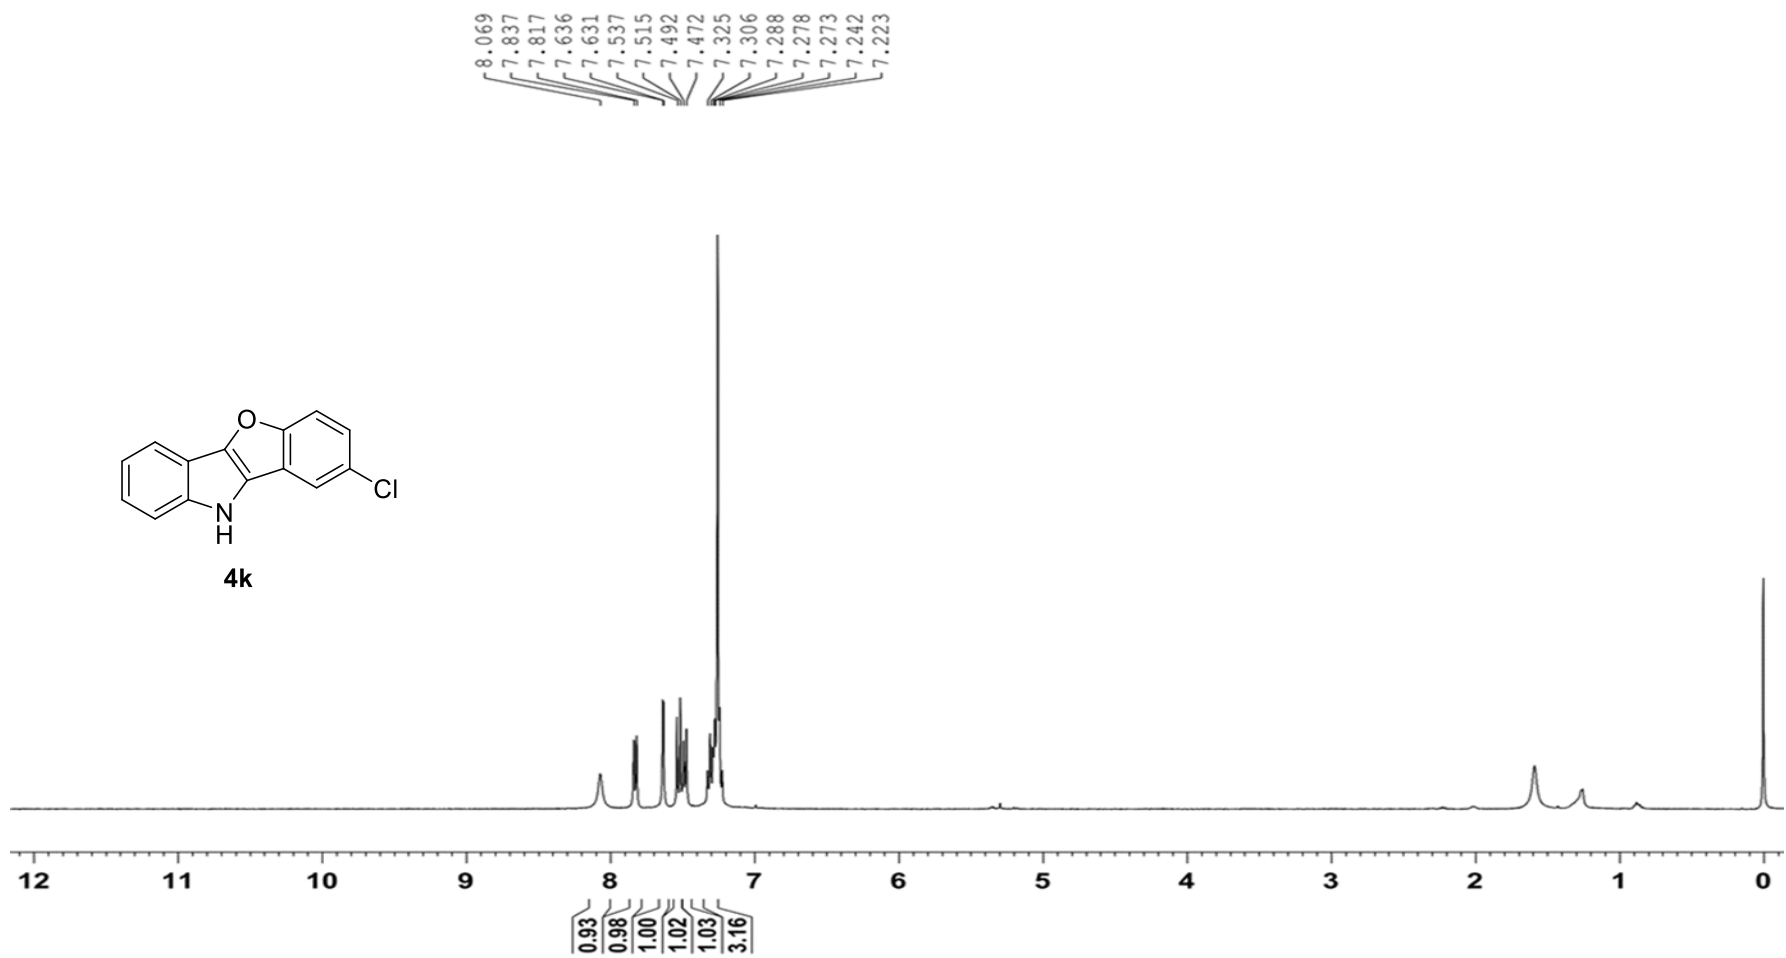

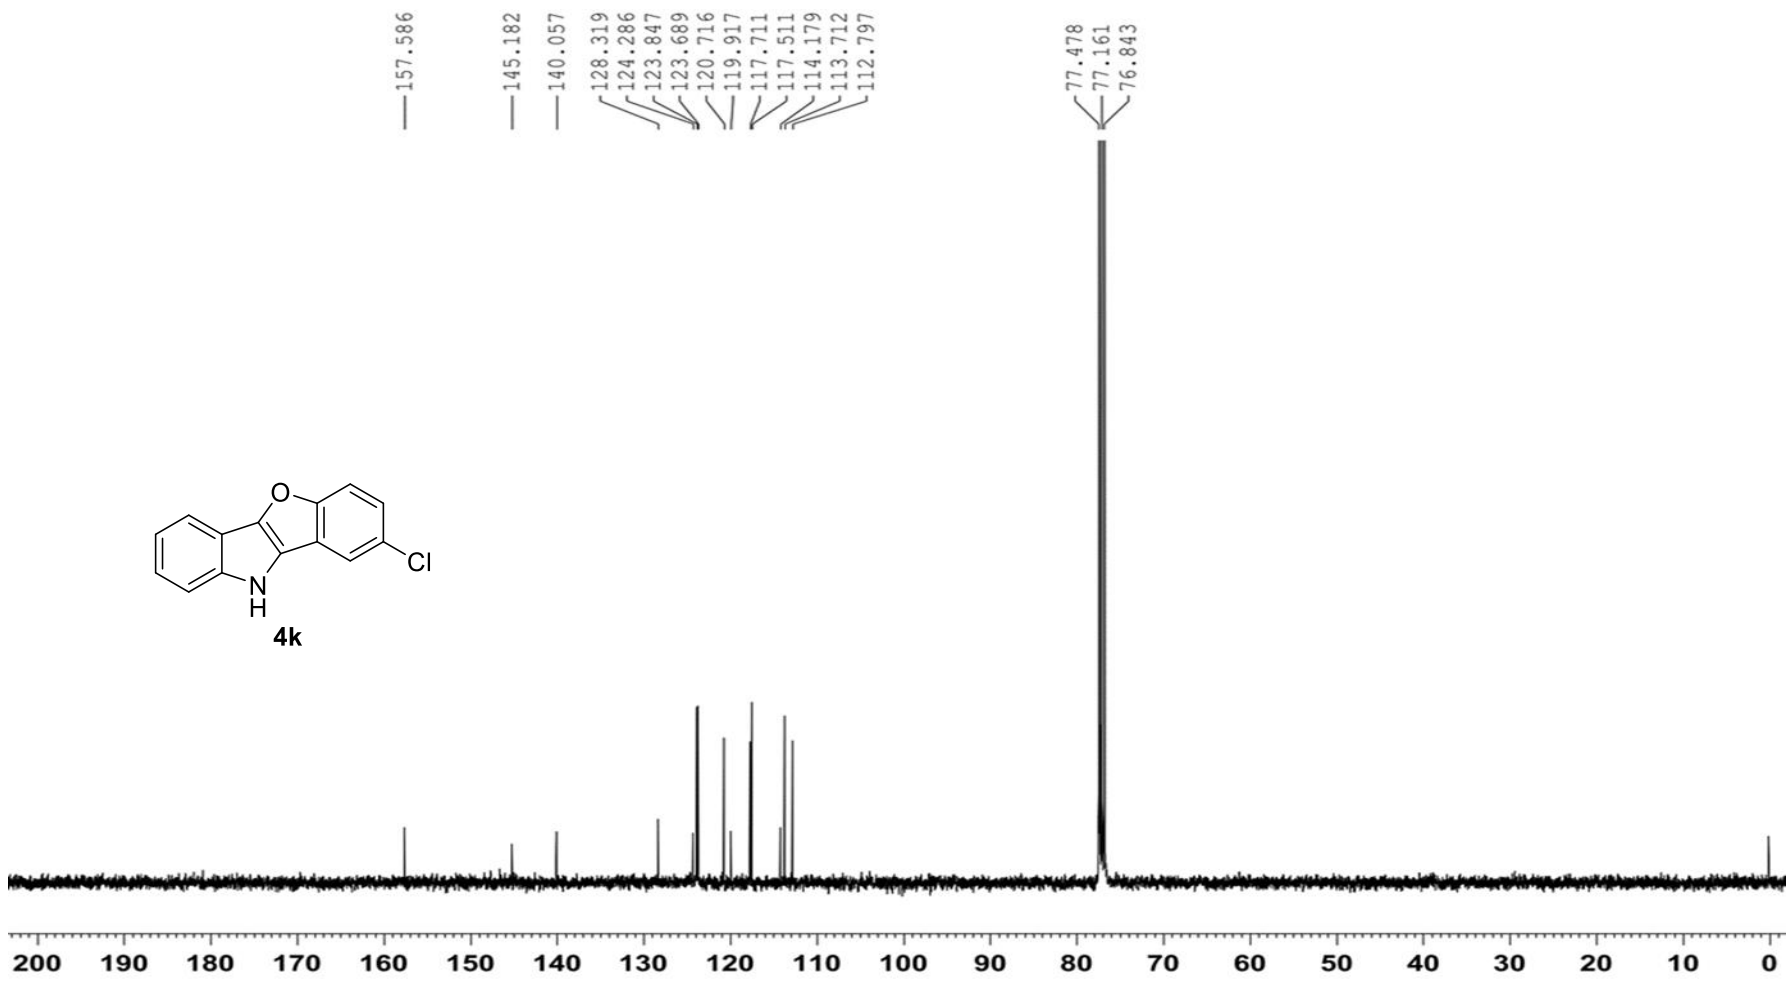

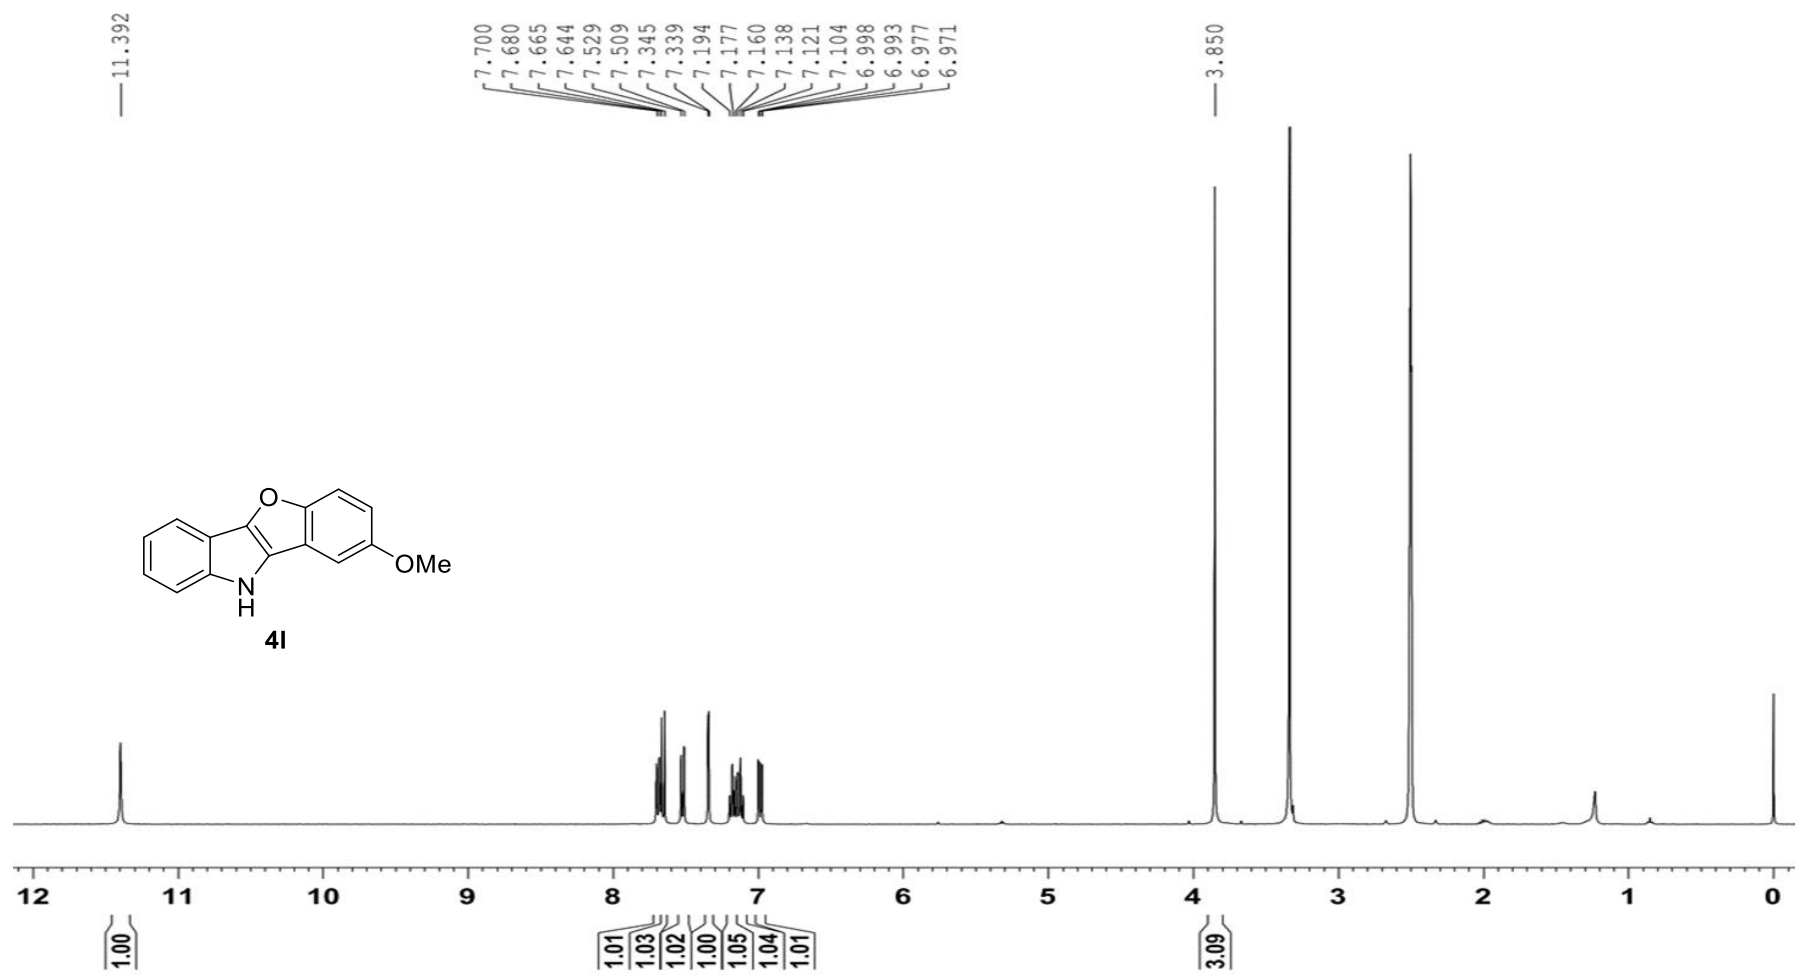



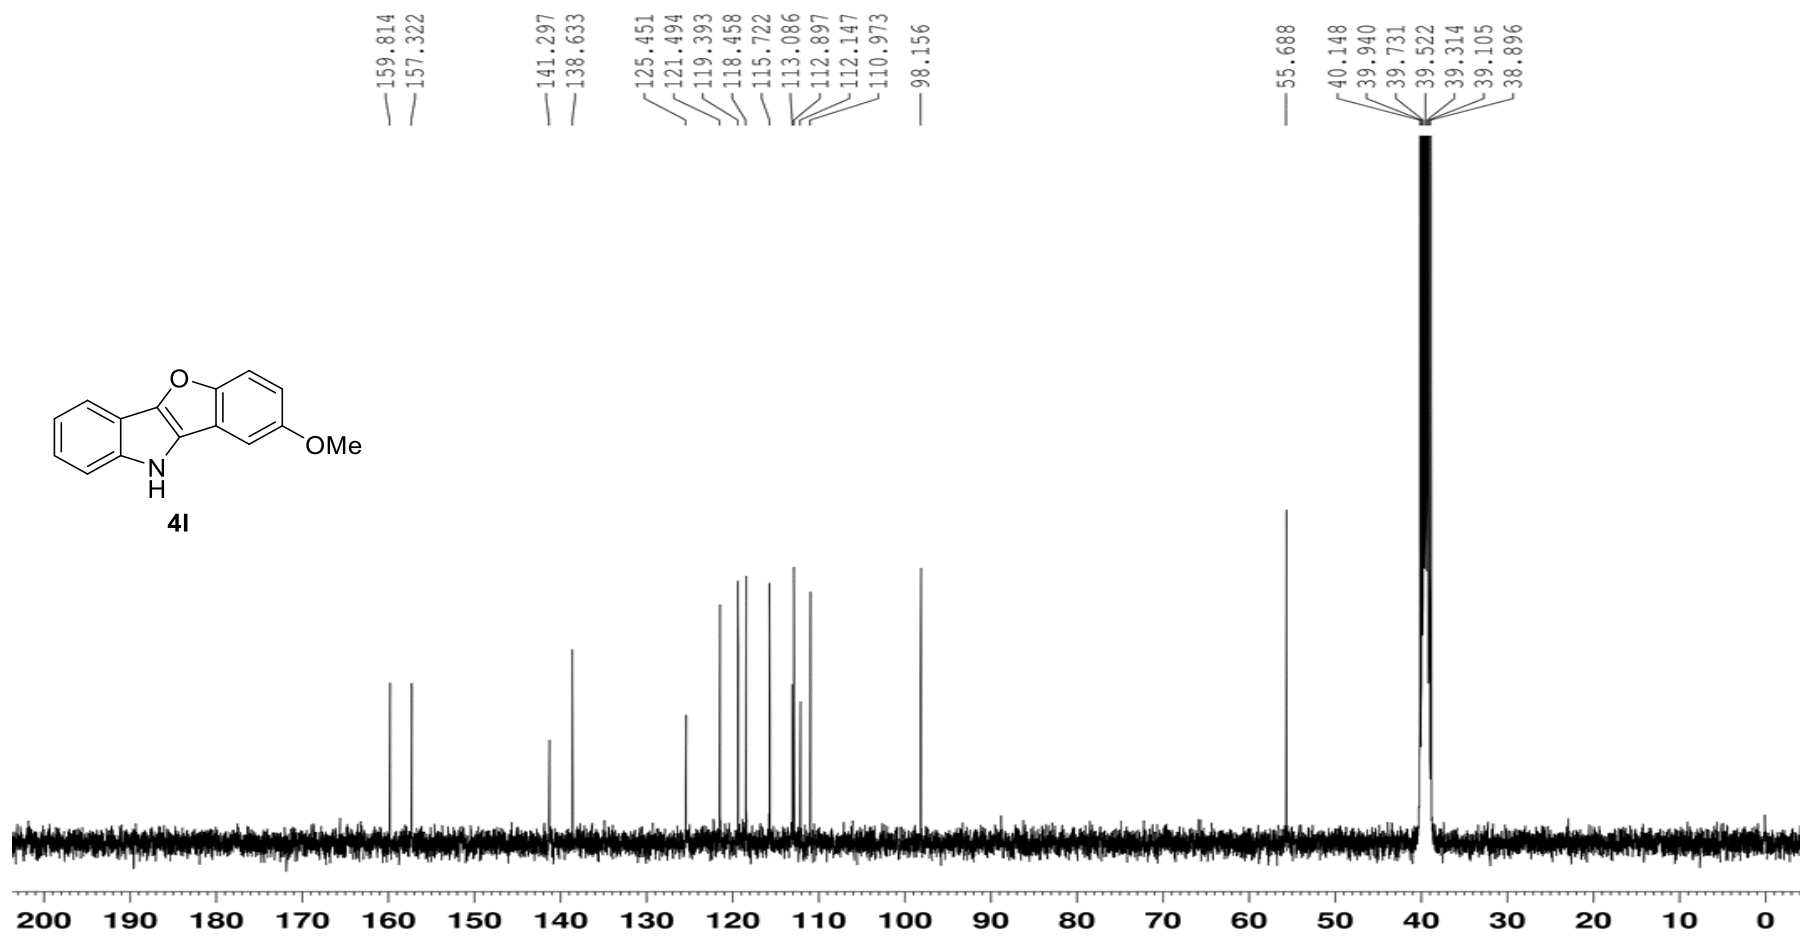

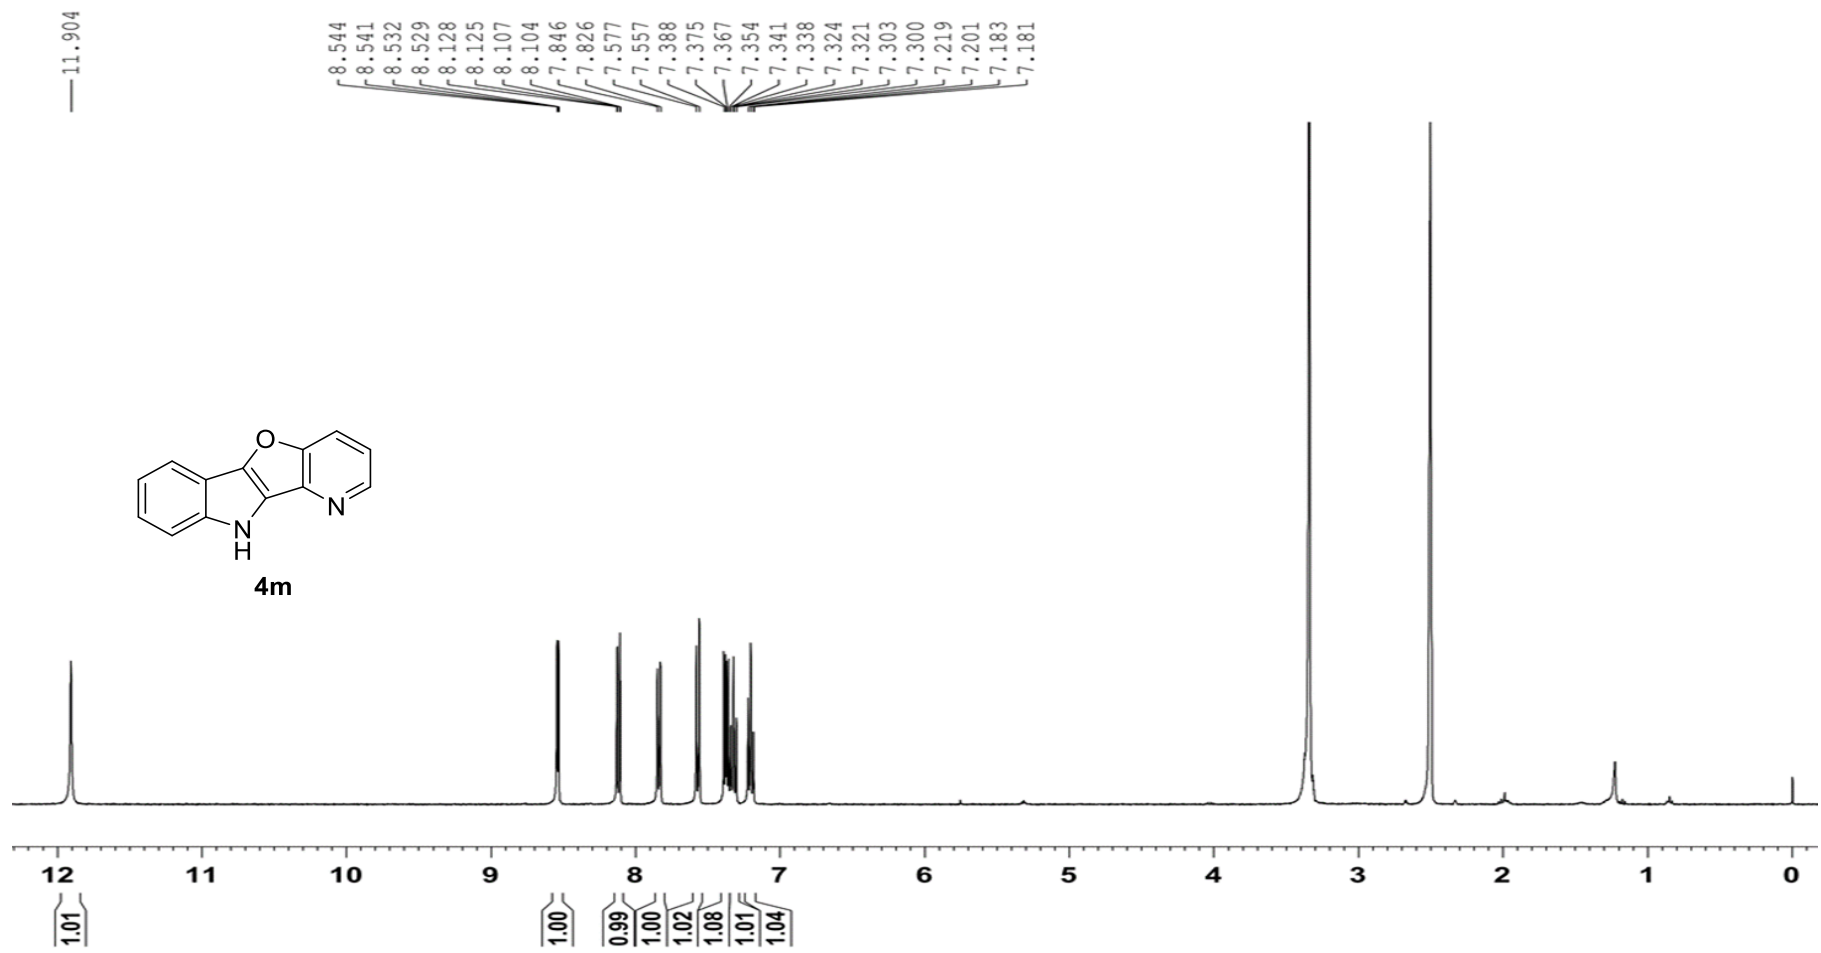

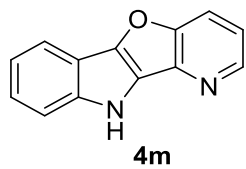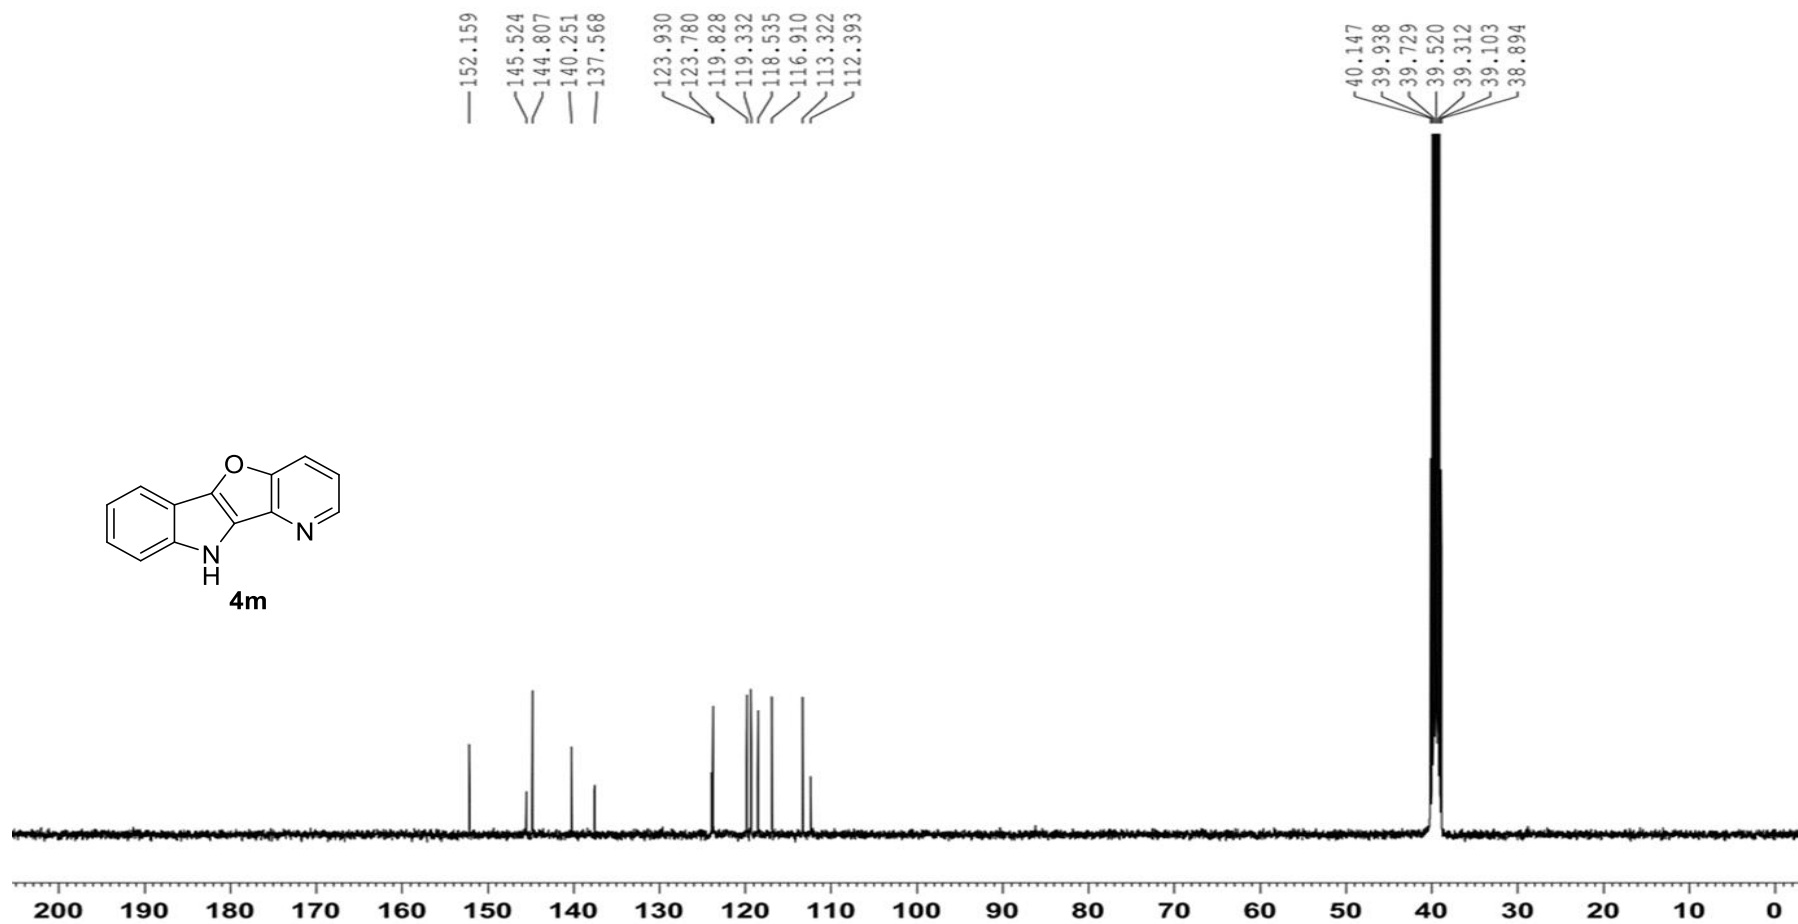

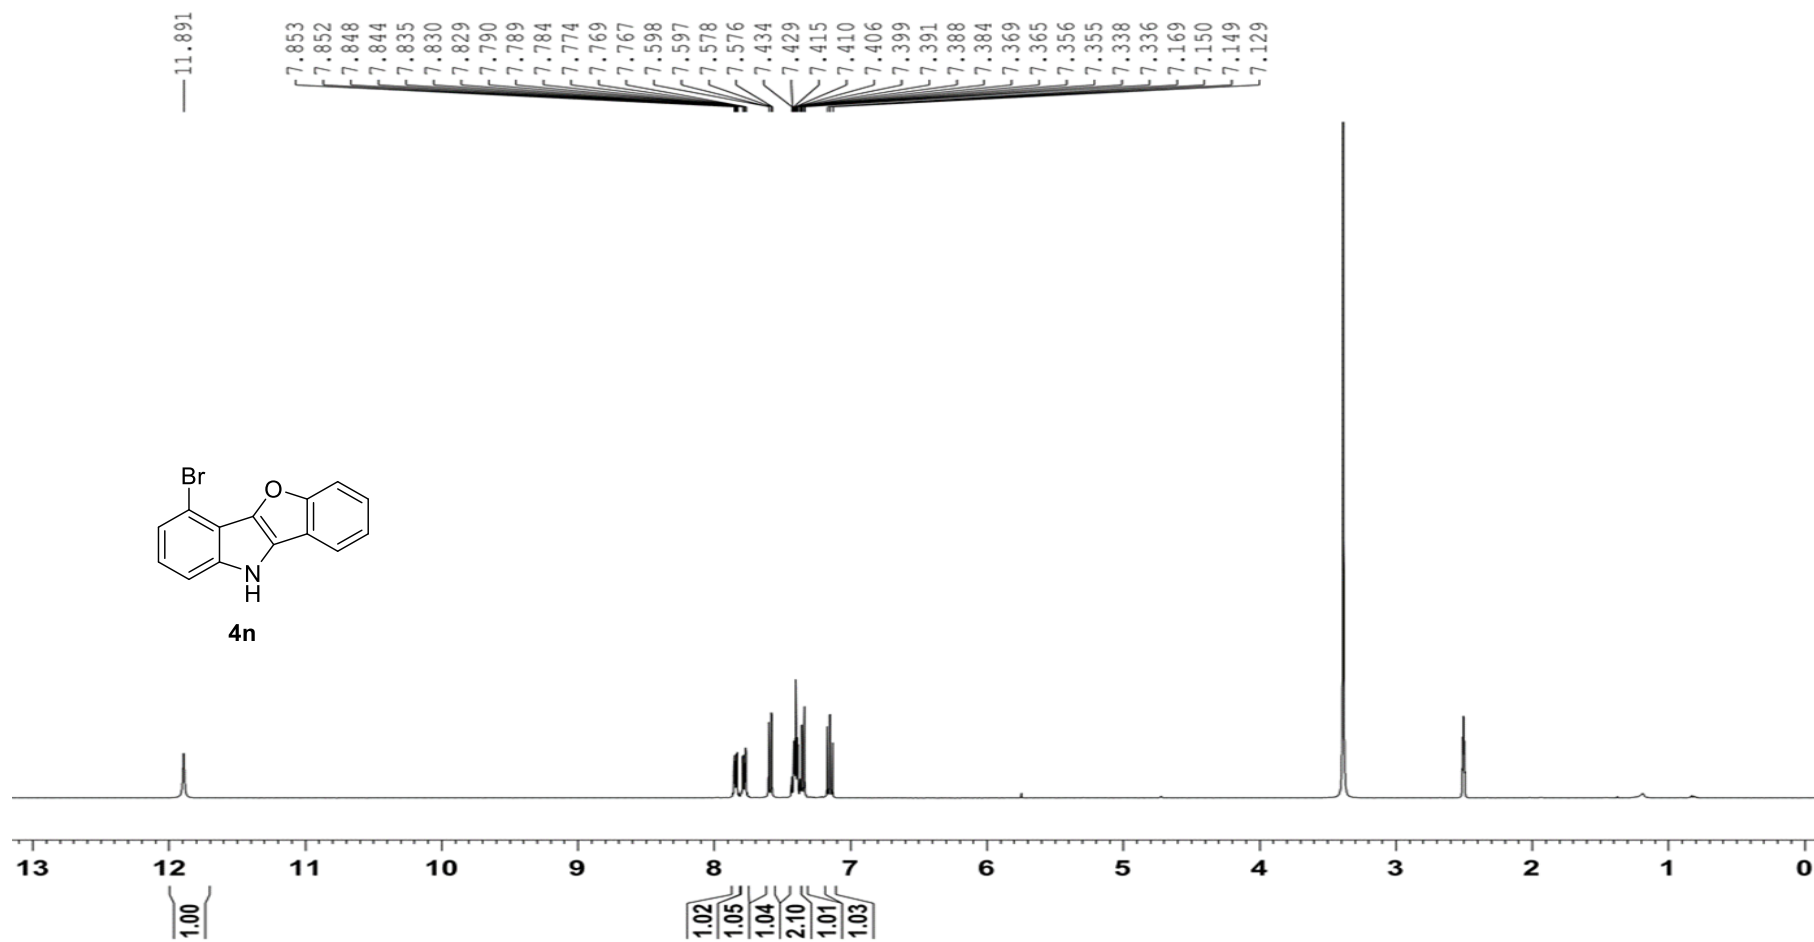

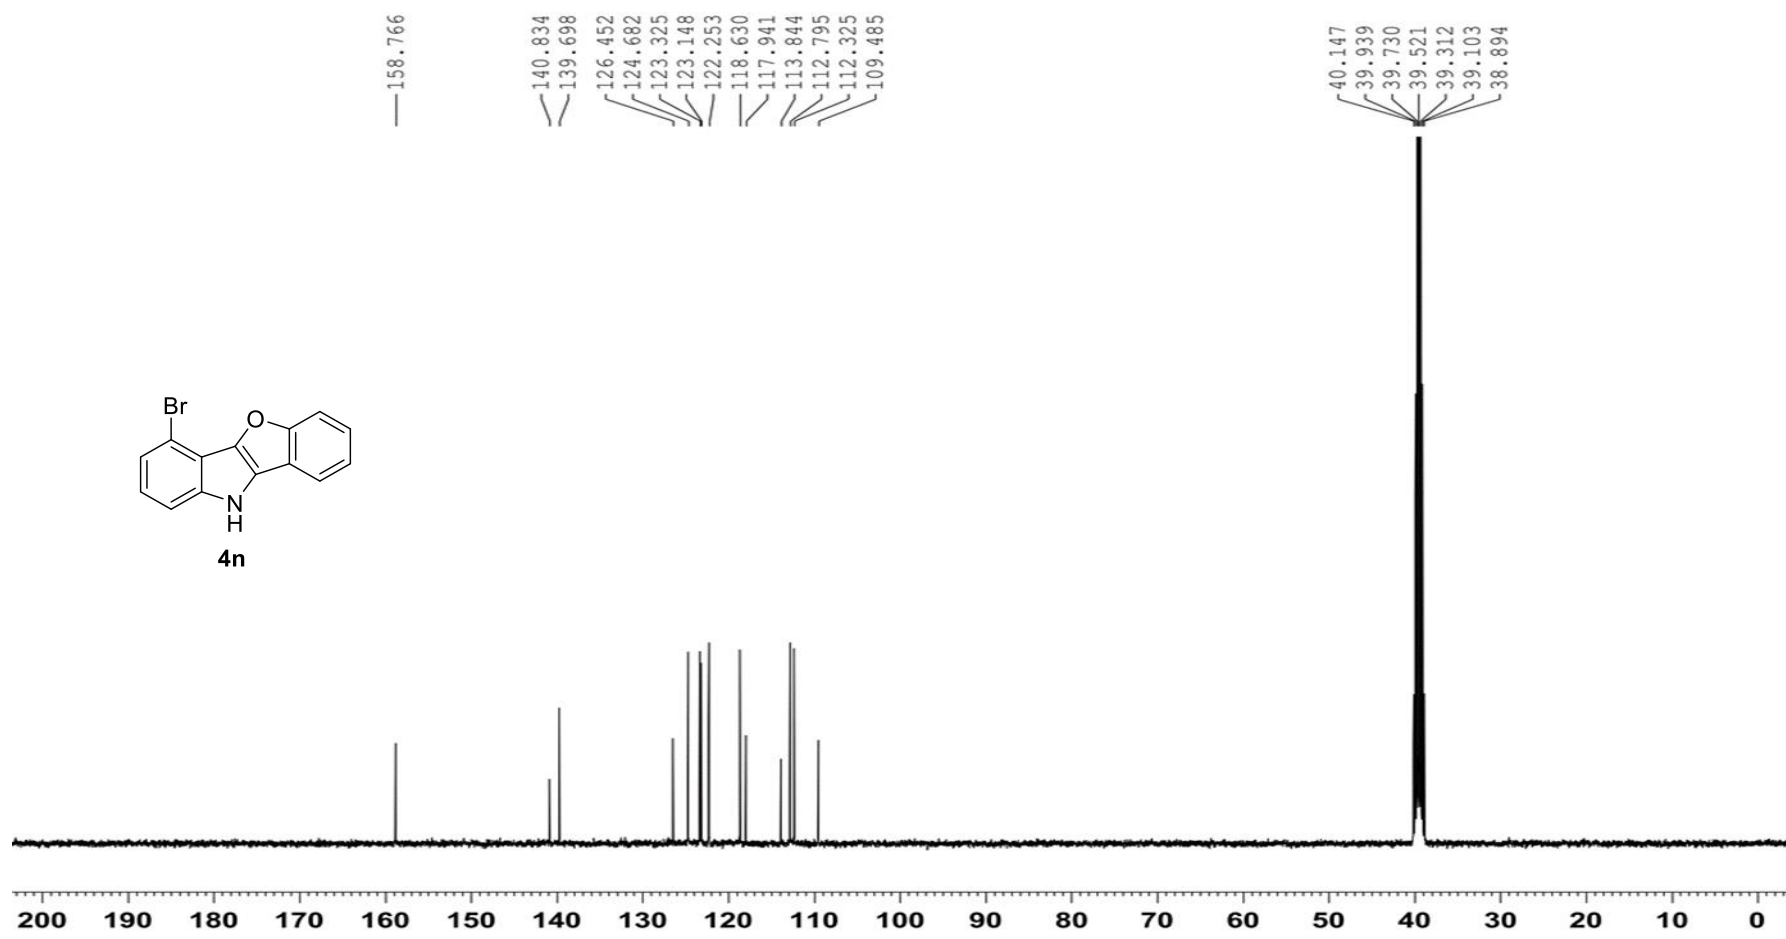

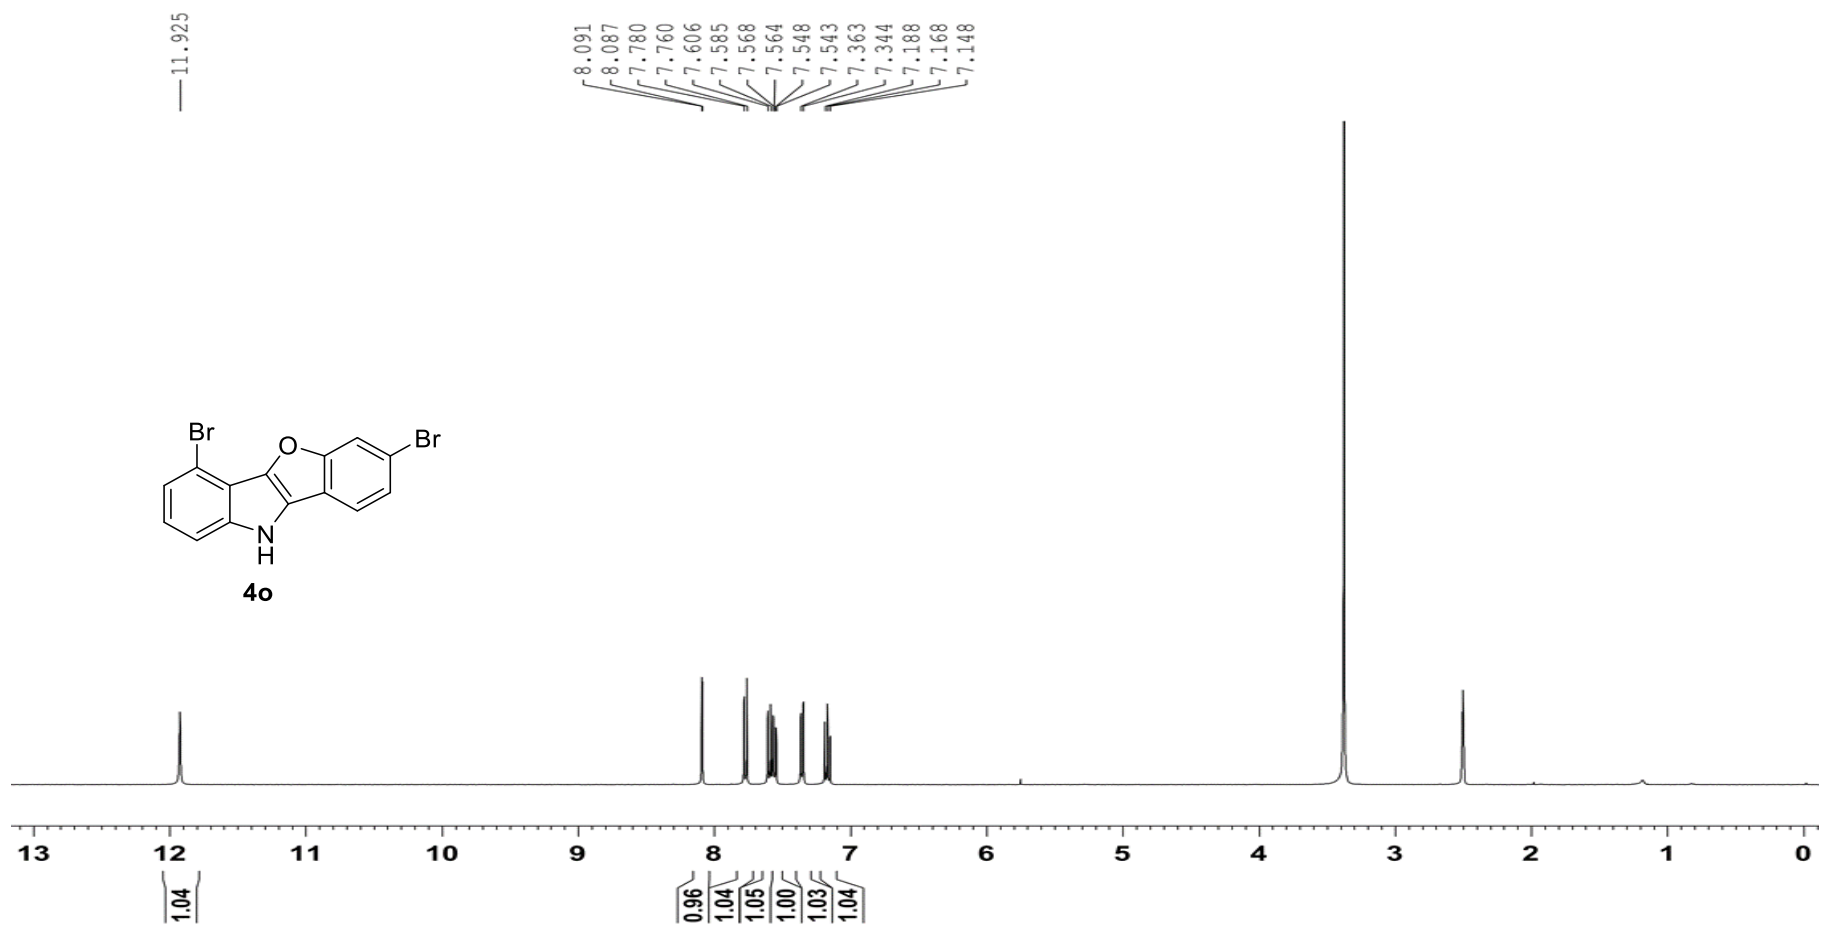

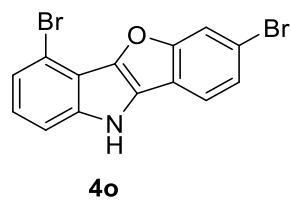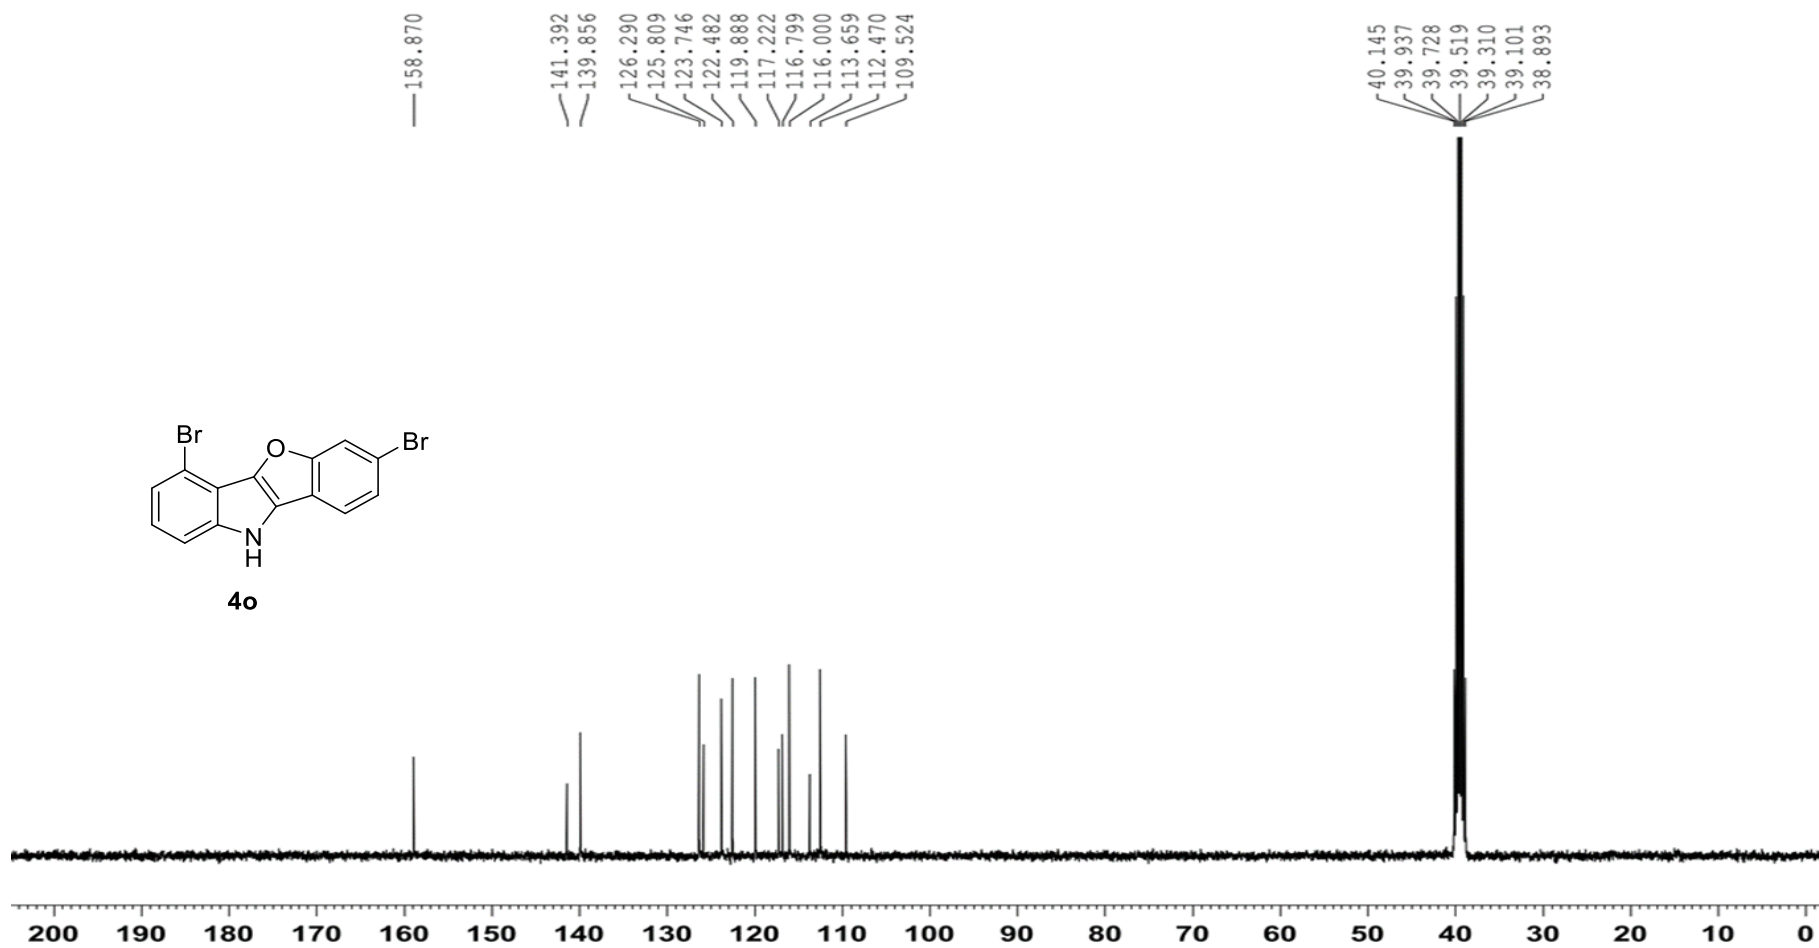

—12.027

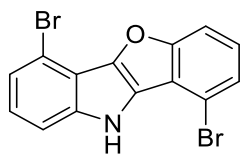

4p

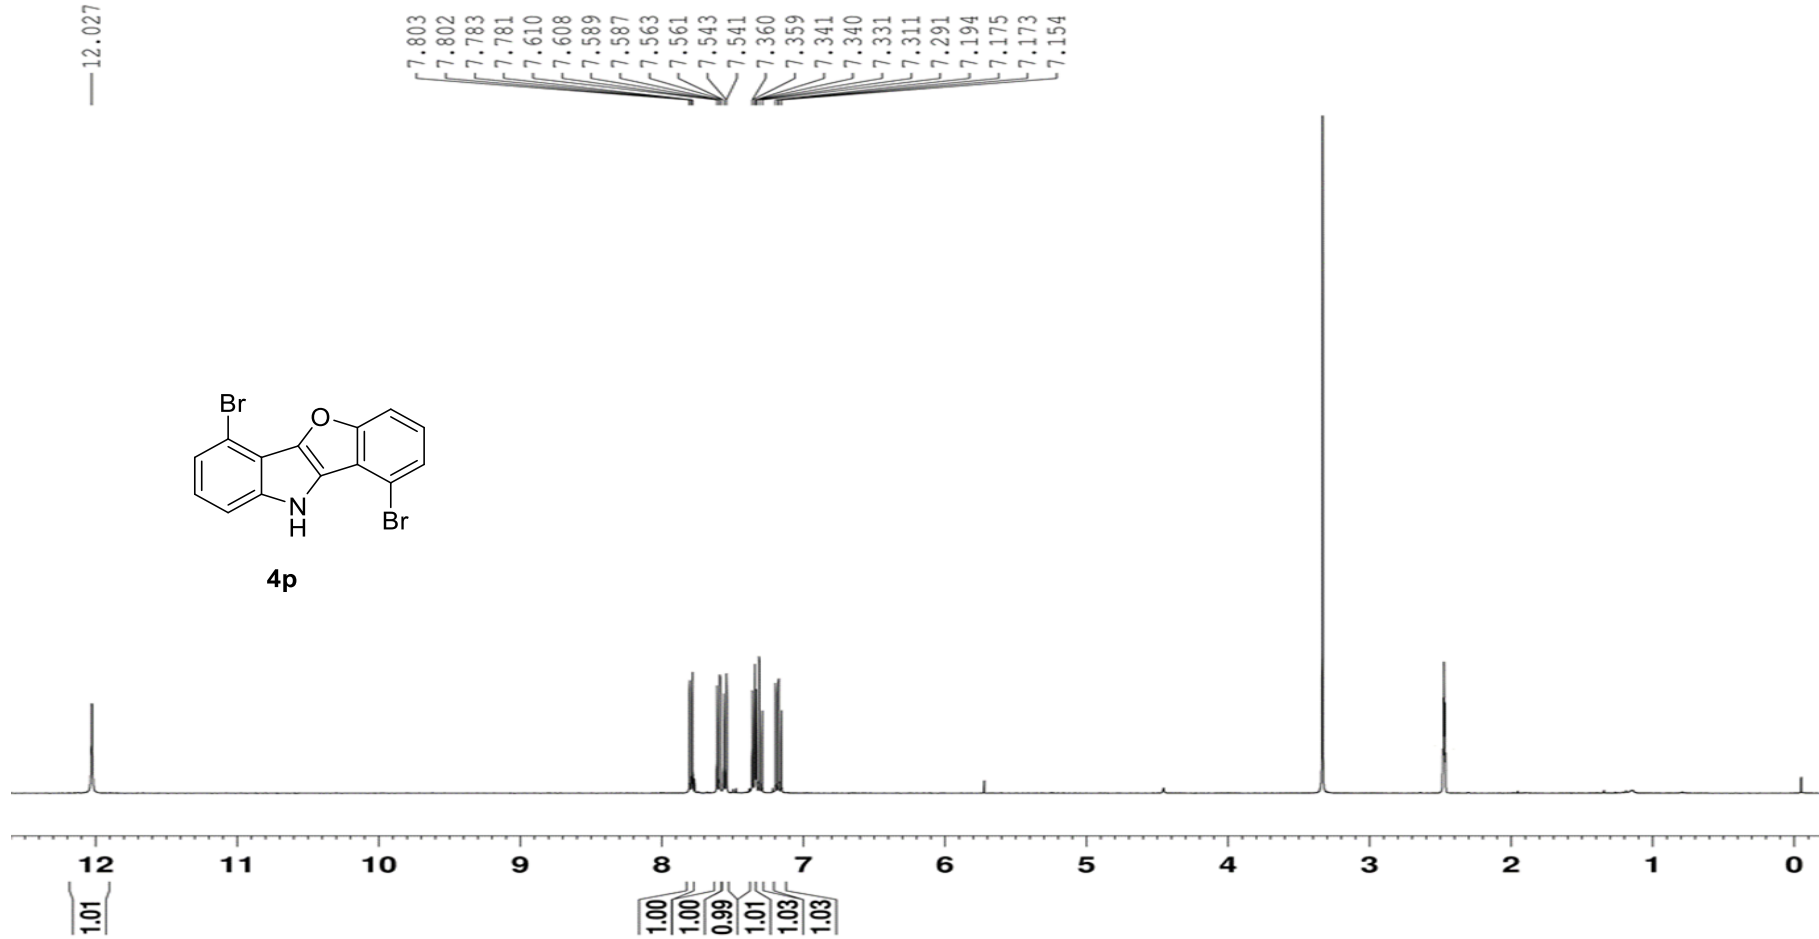



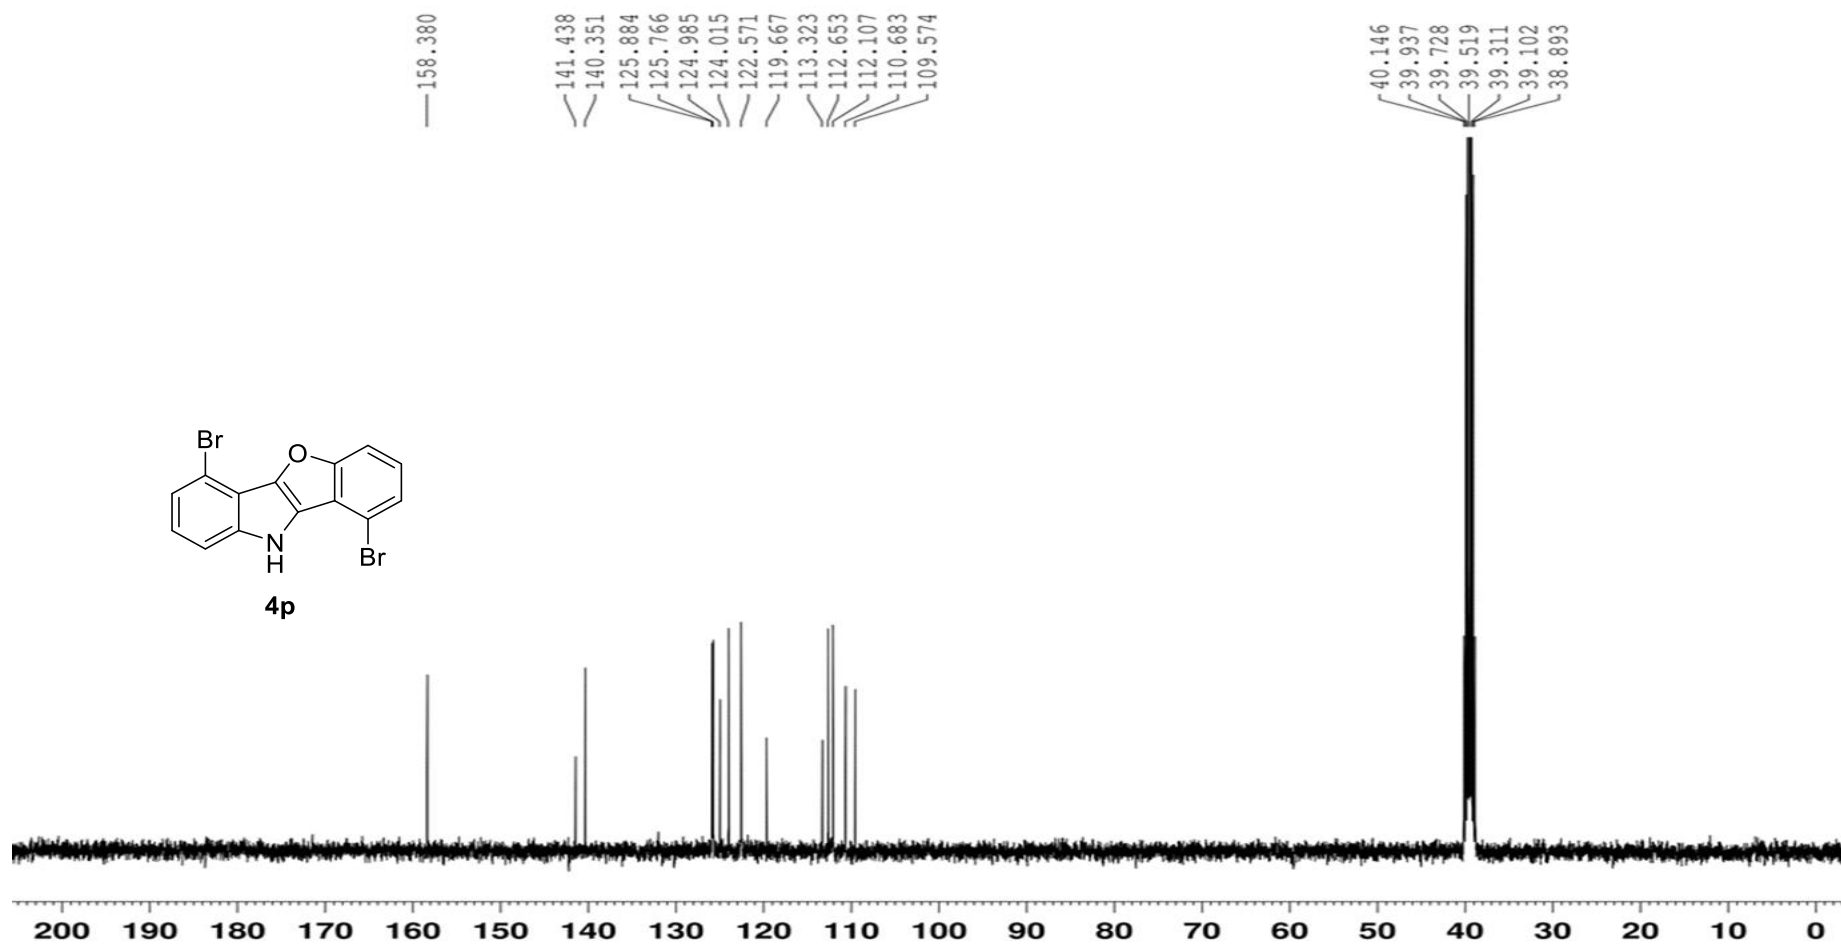

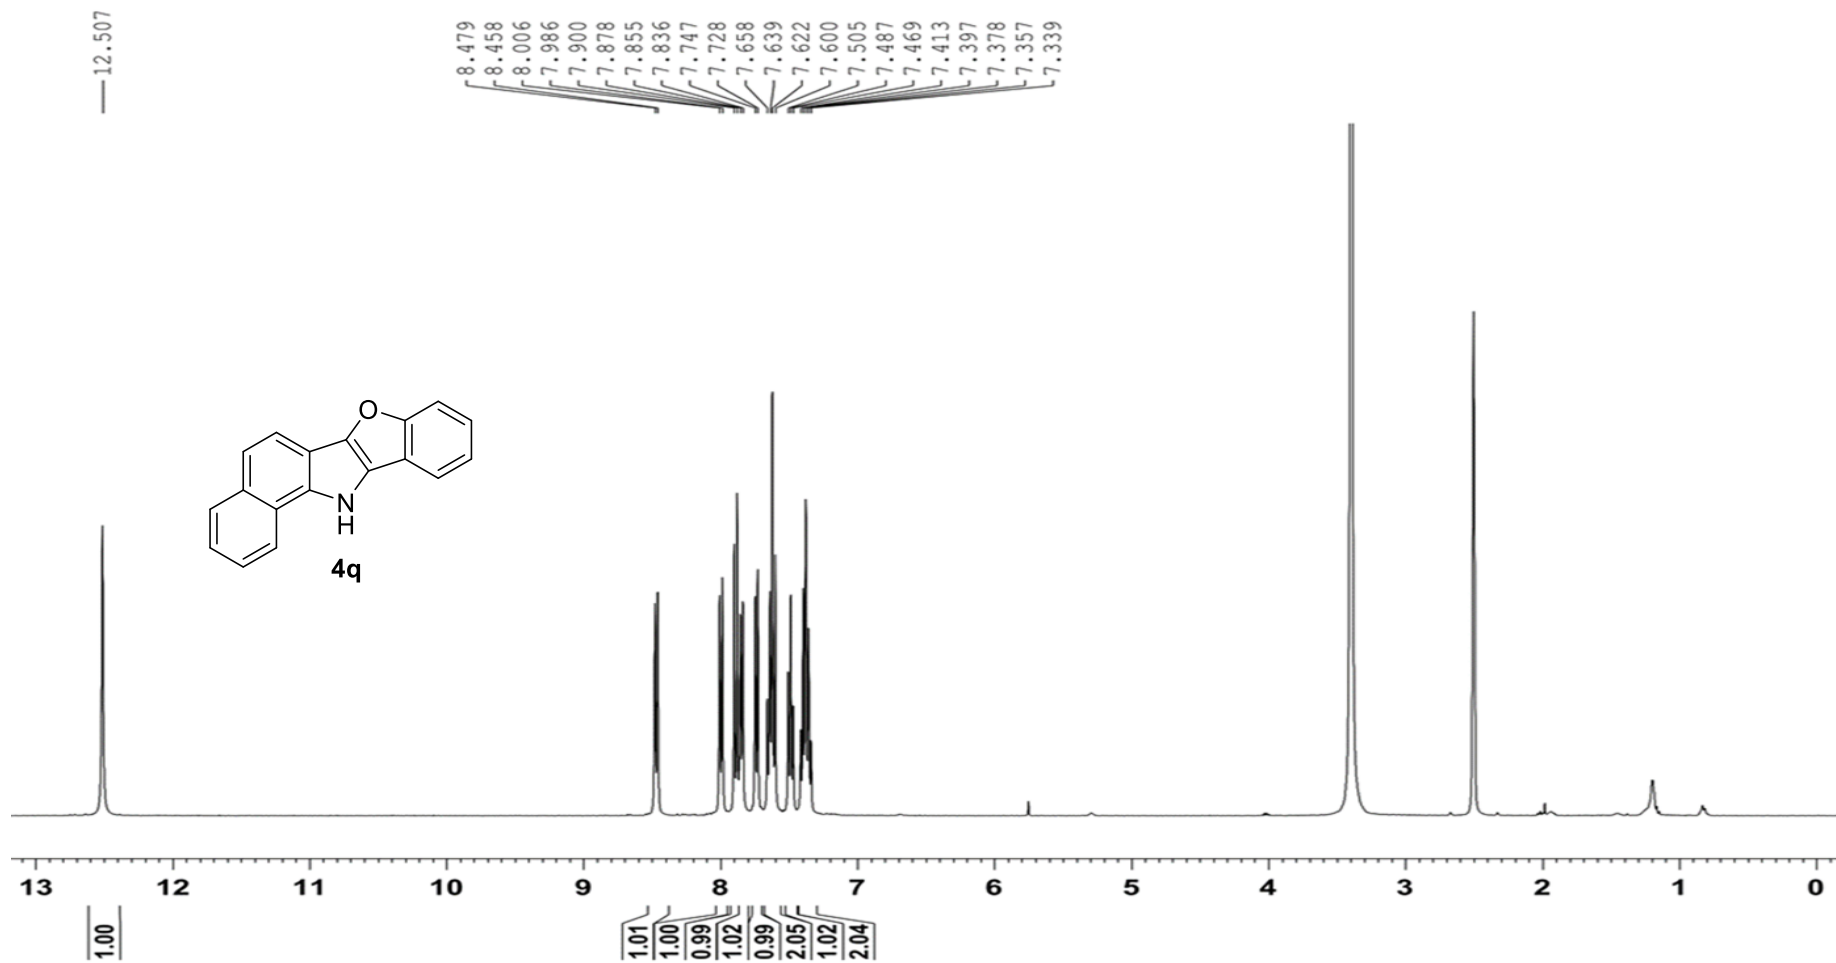

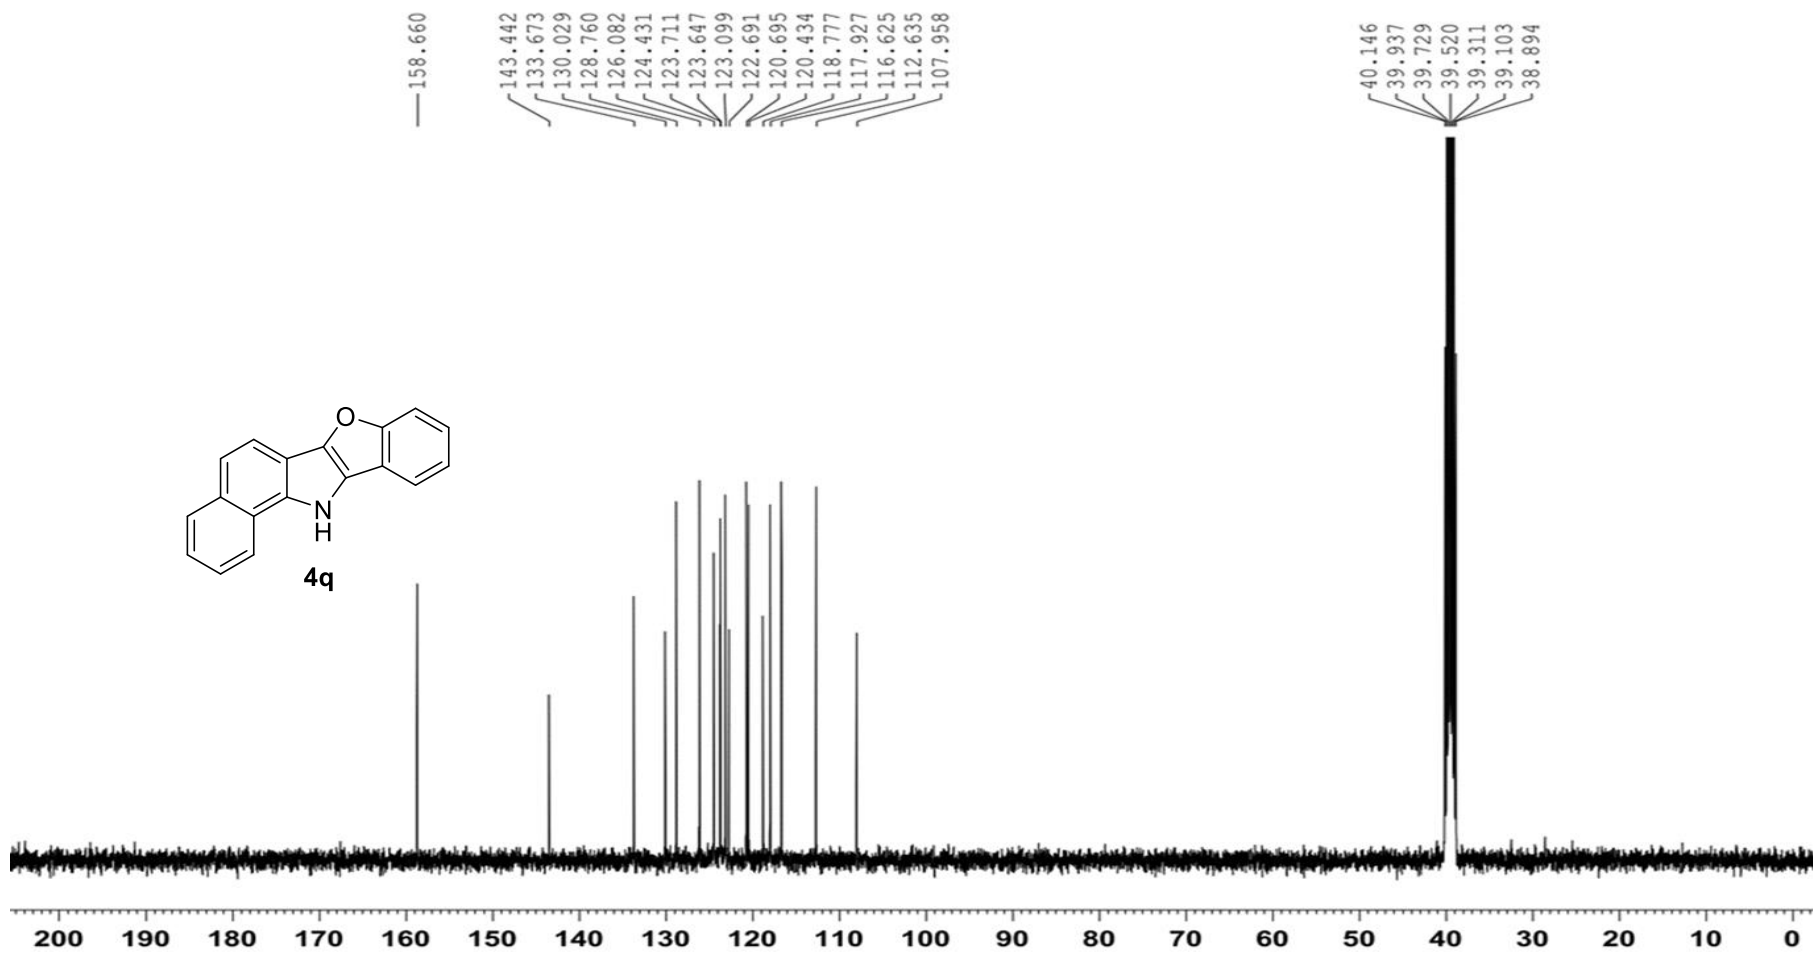

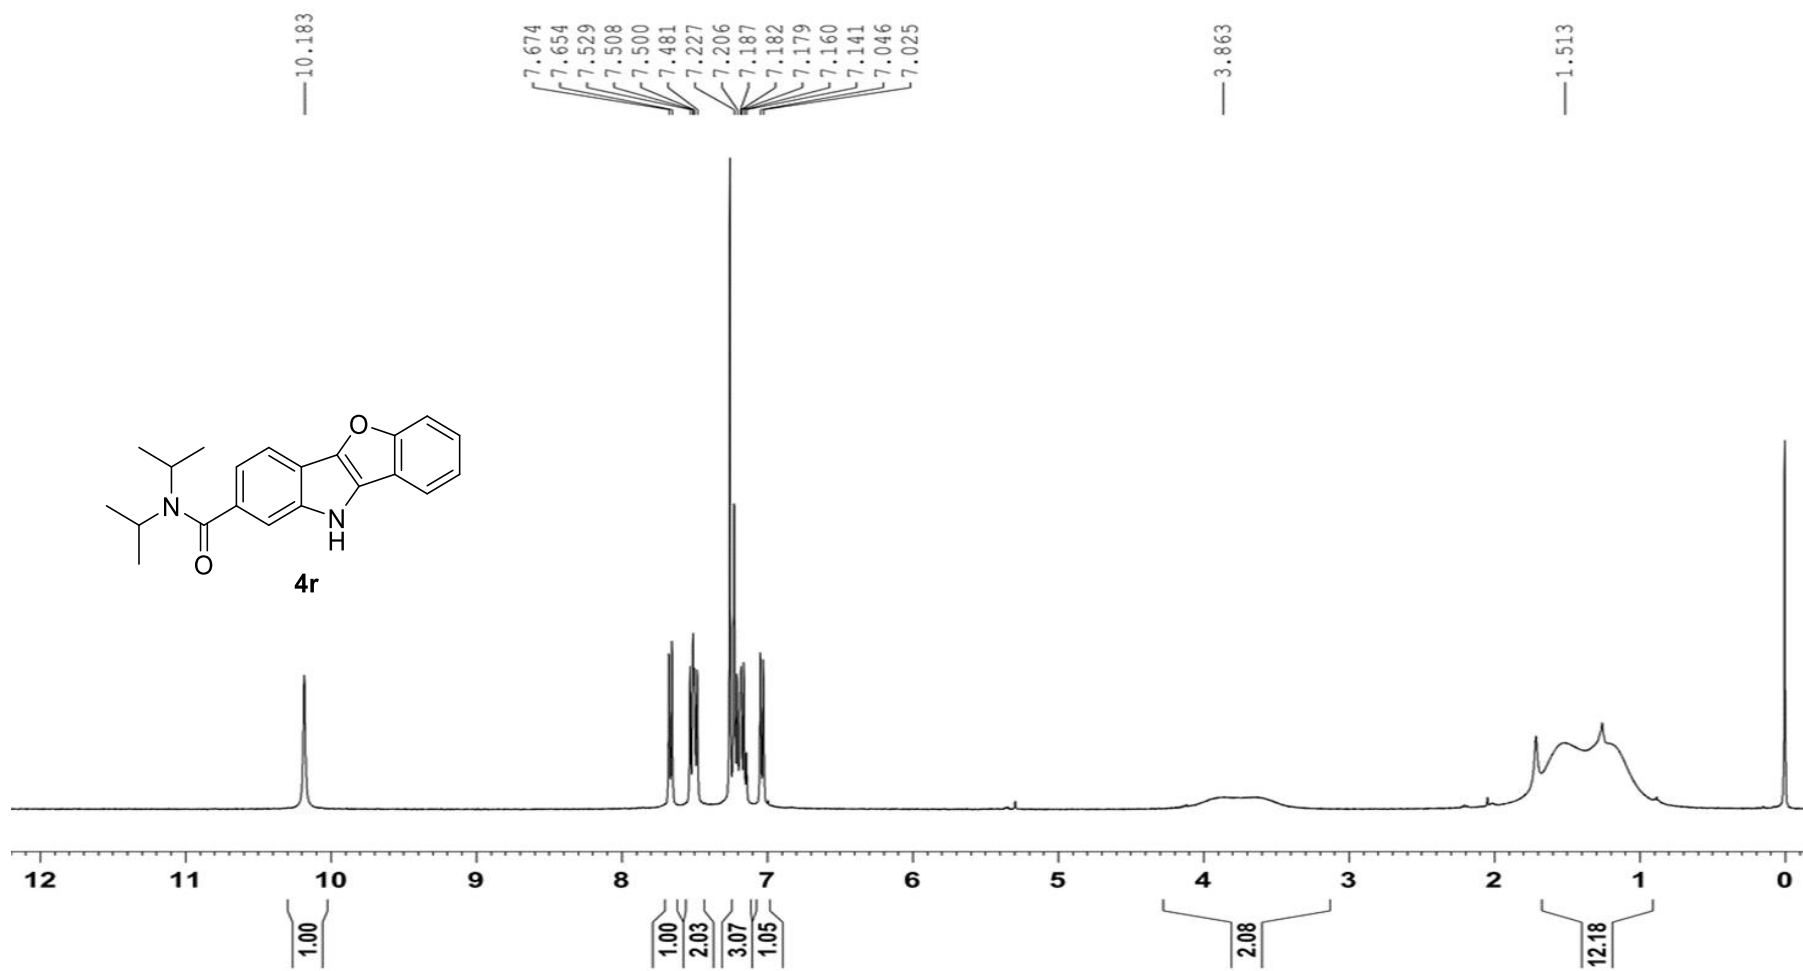

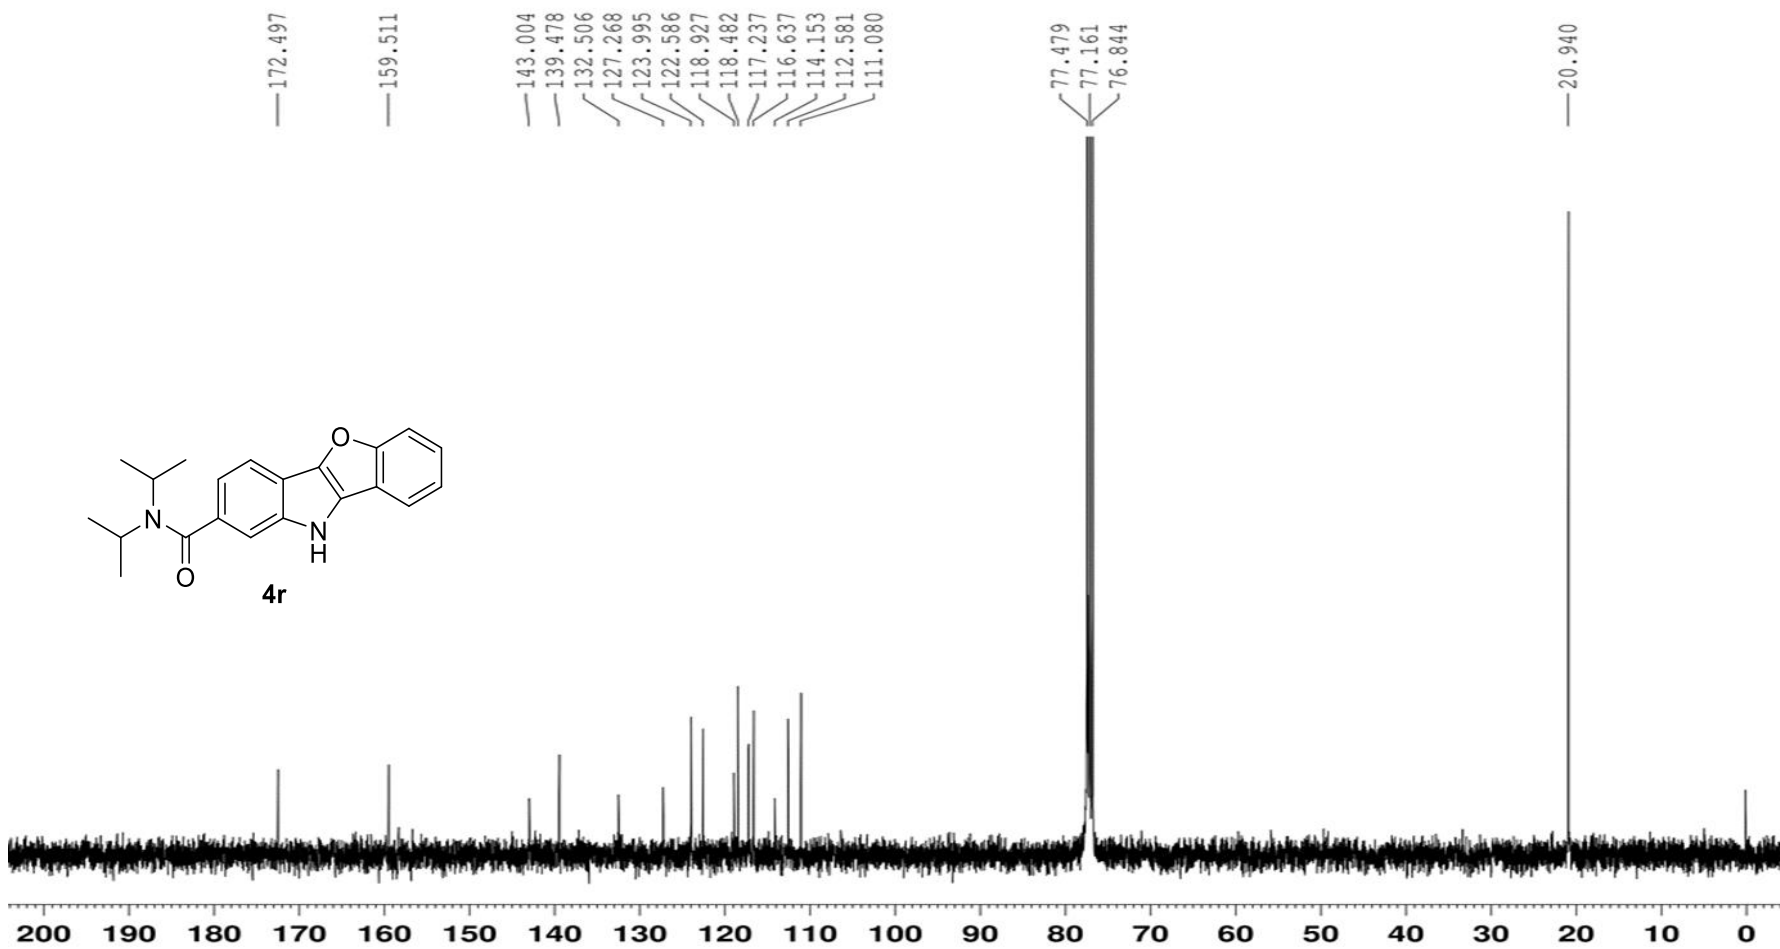

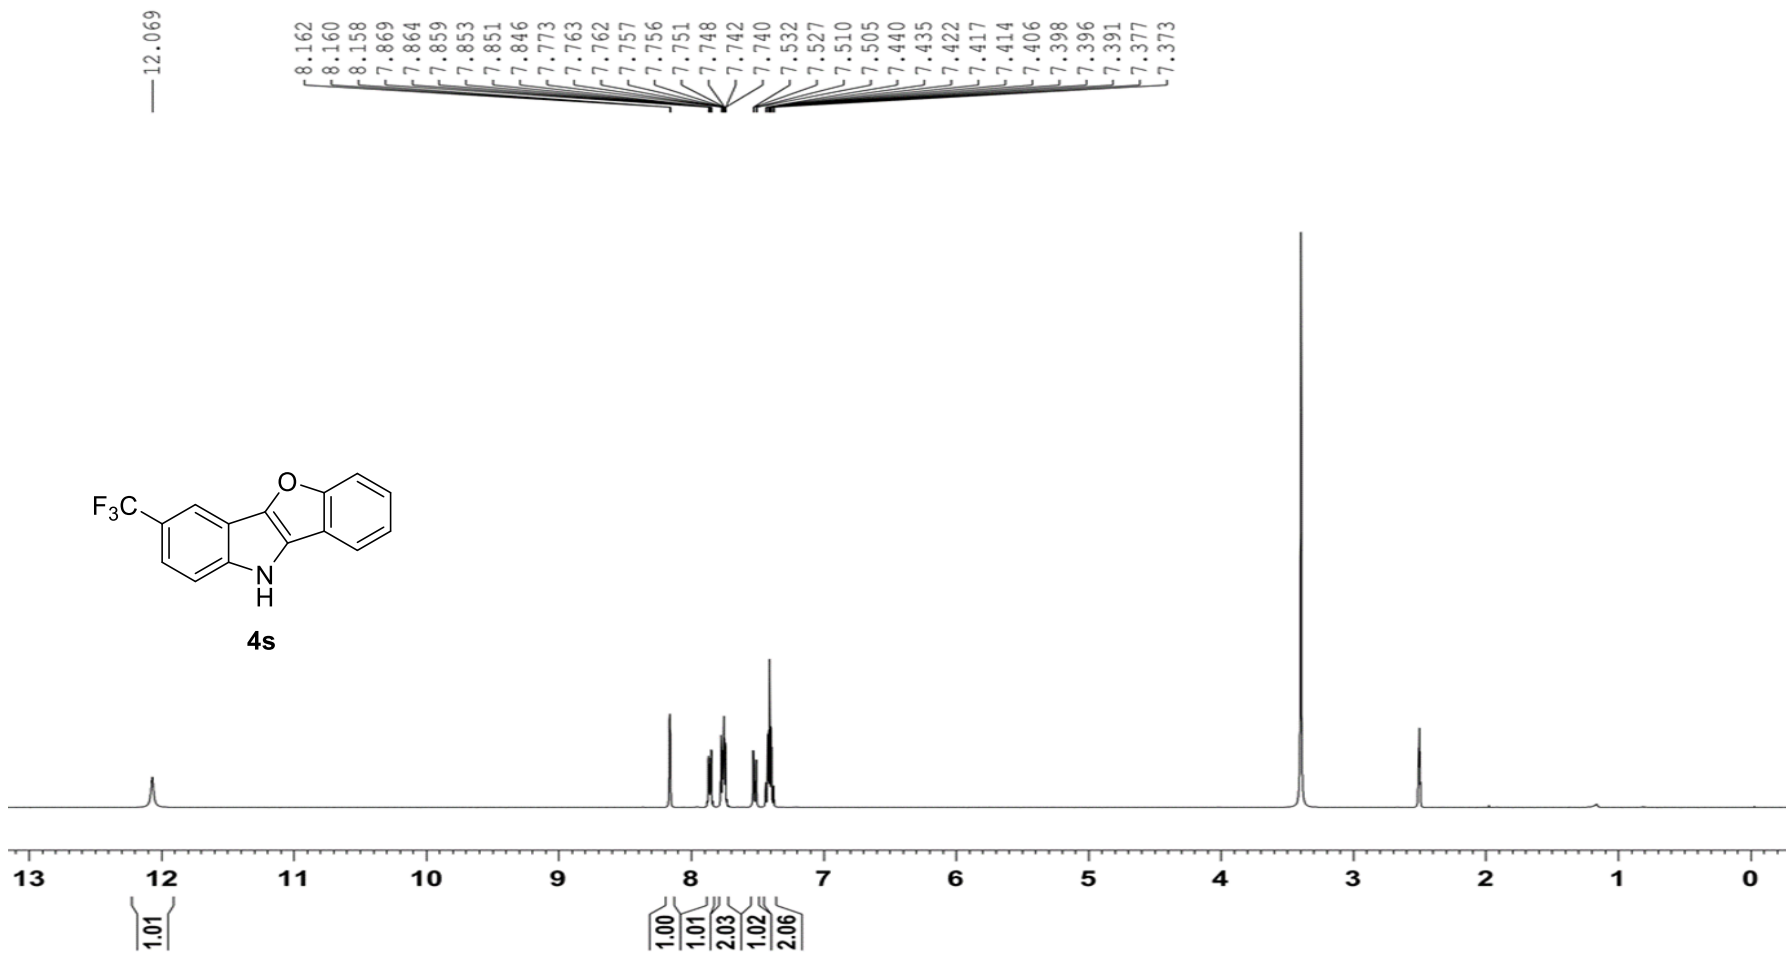

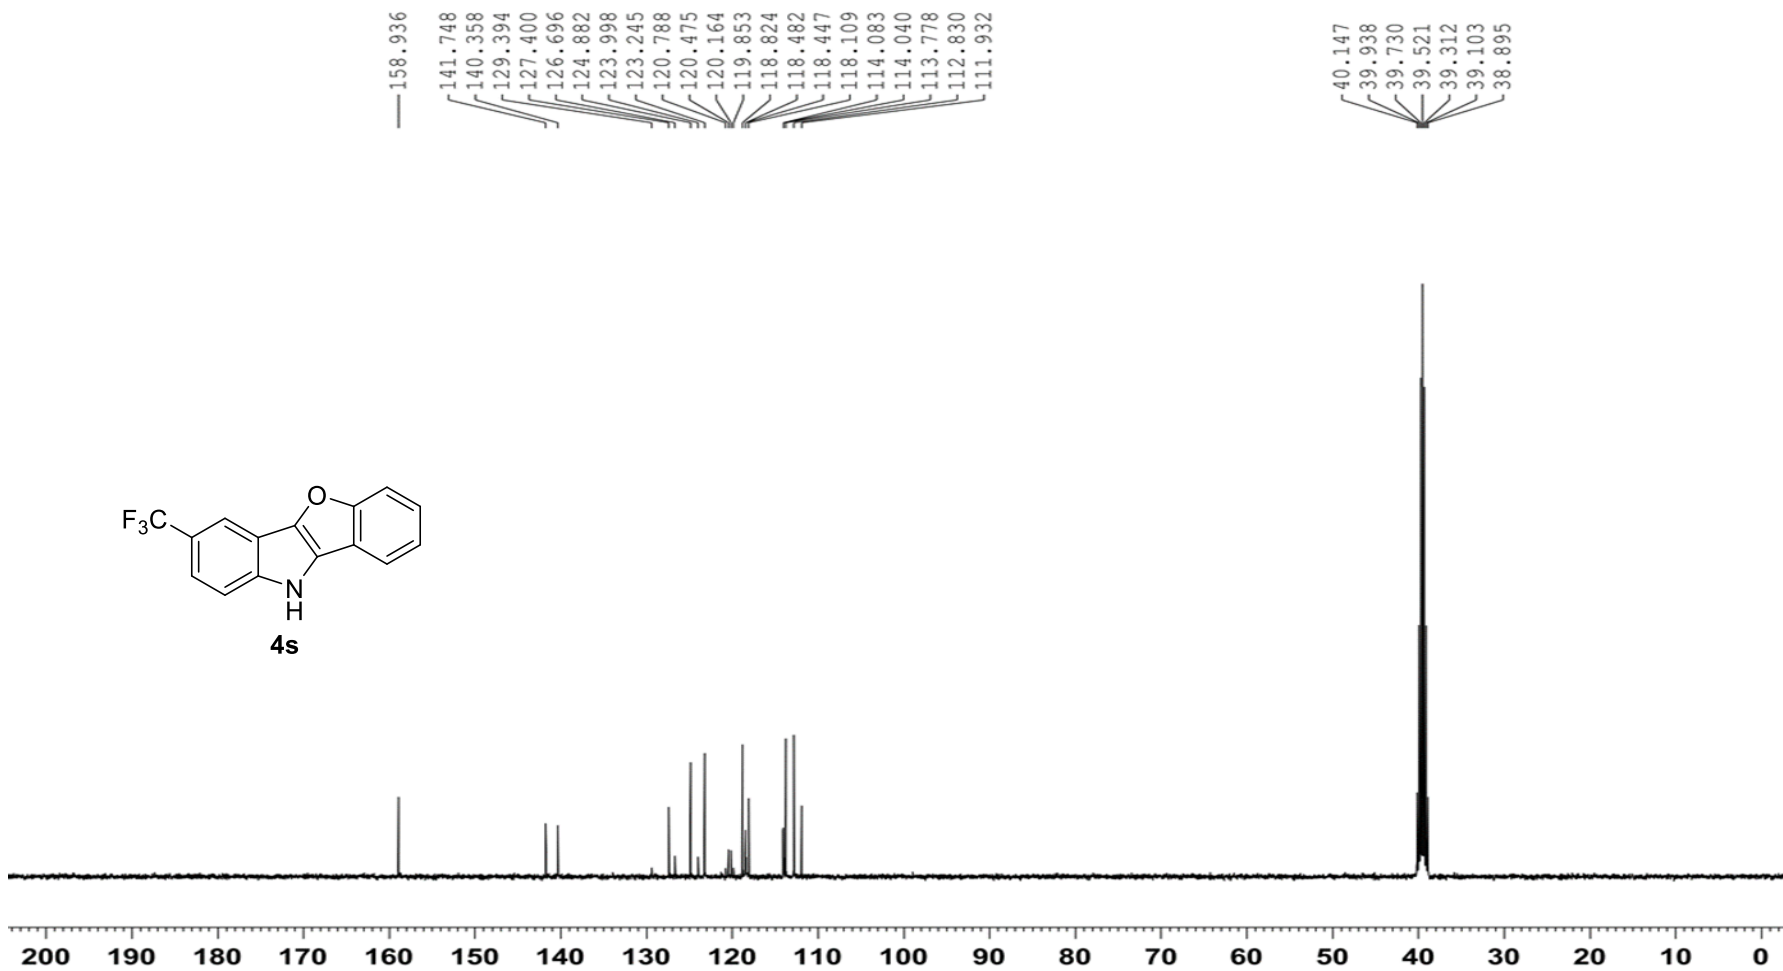

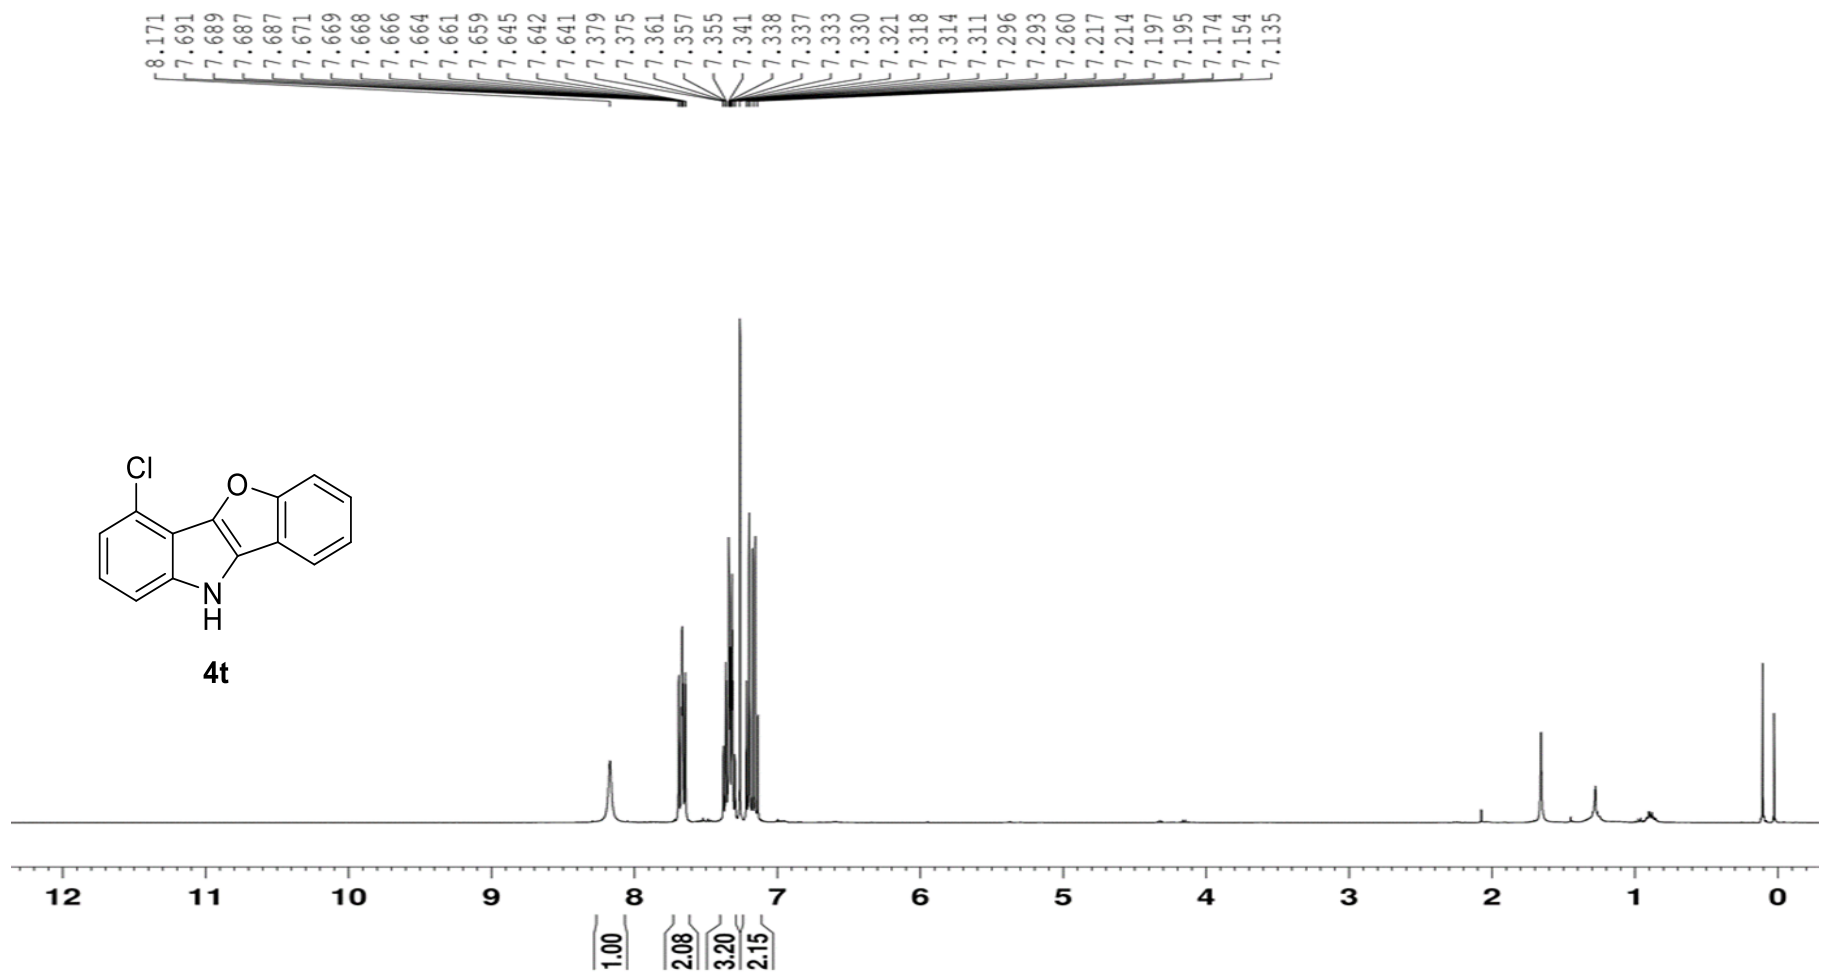



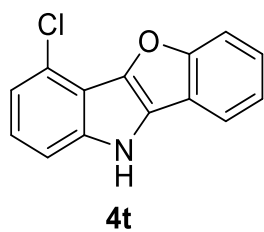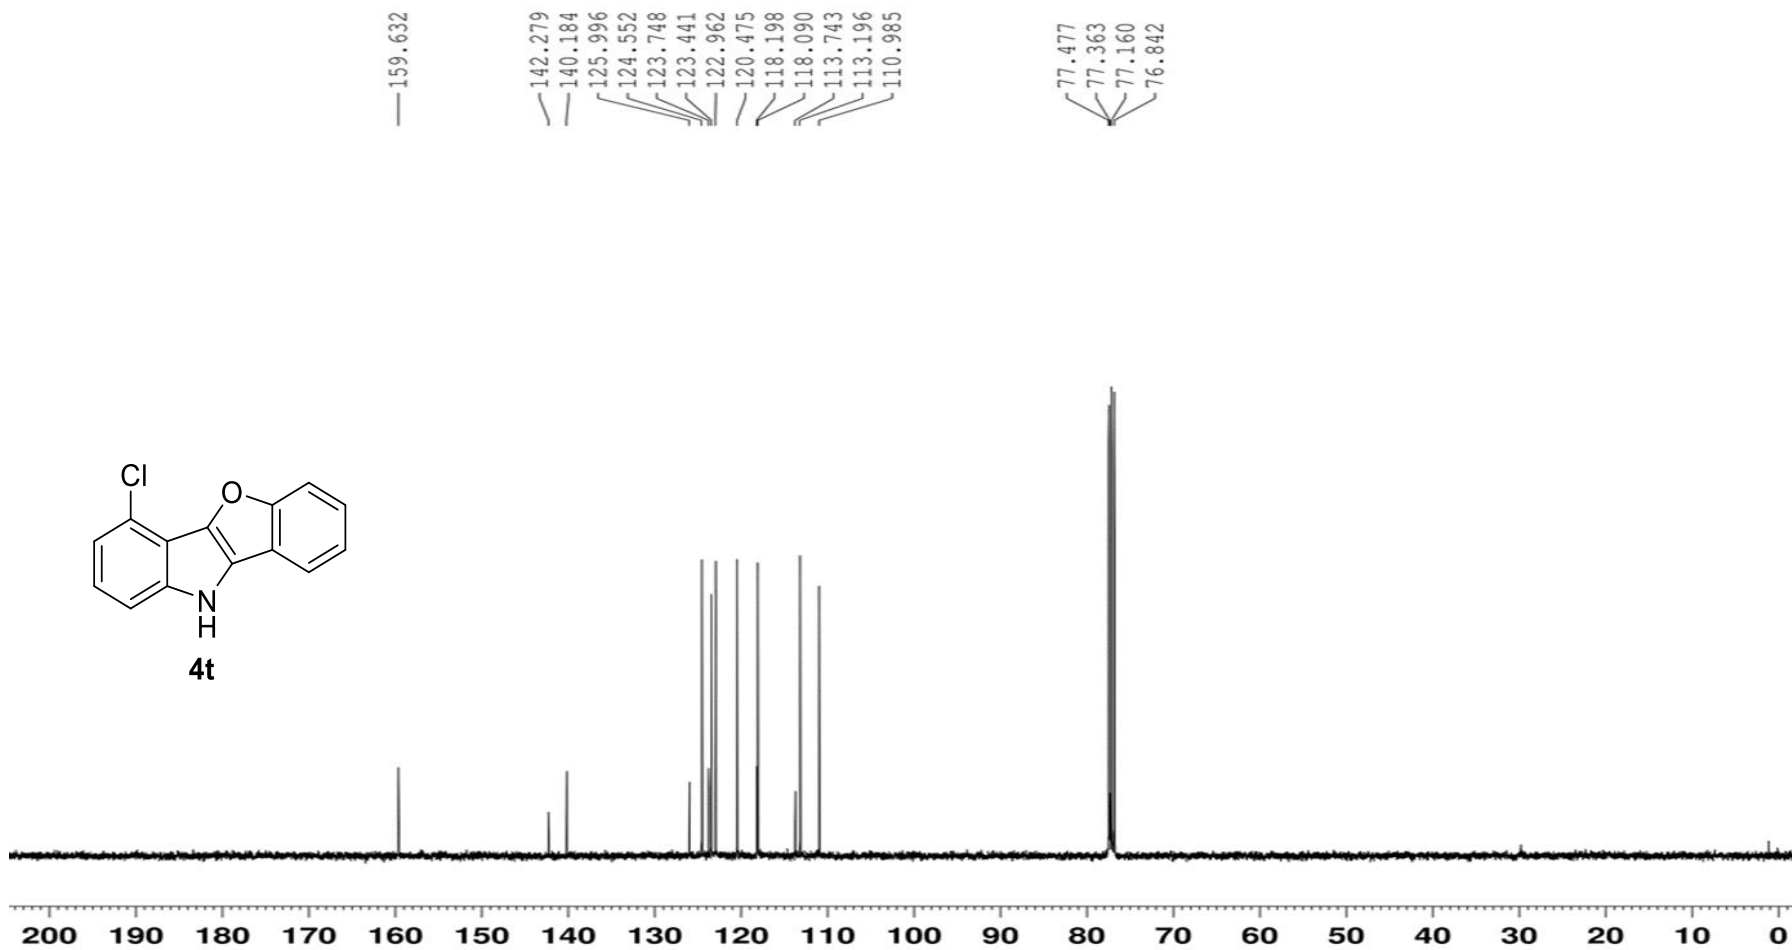

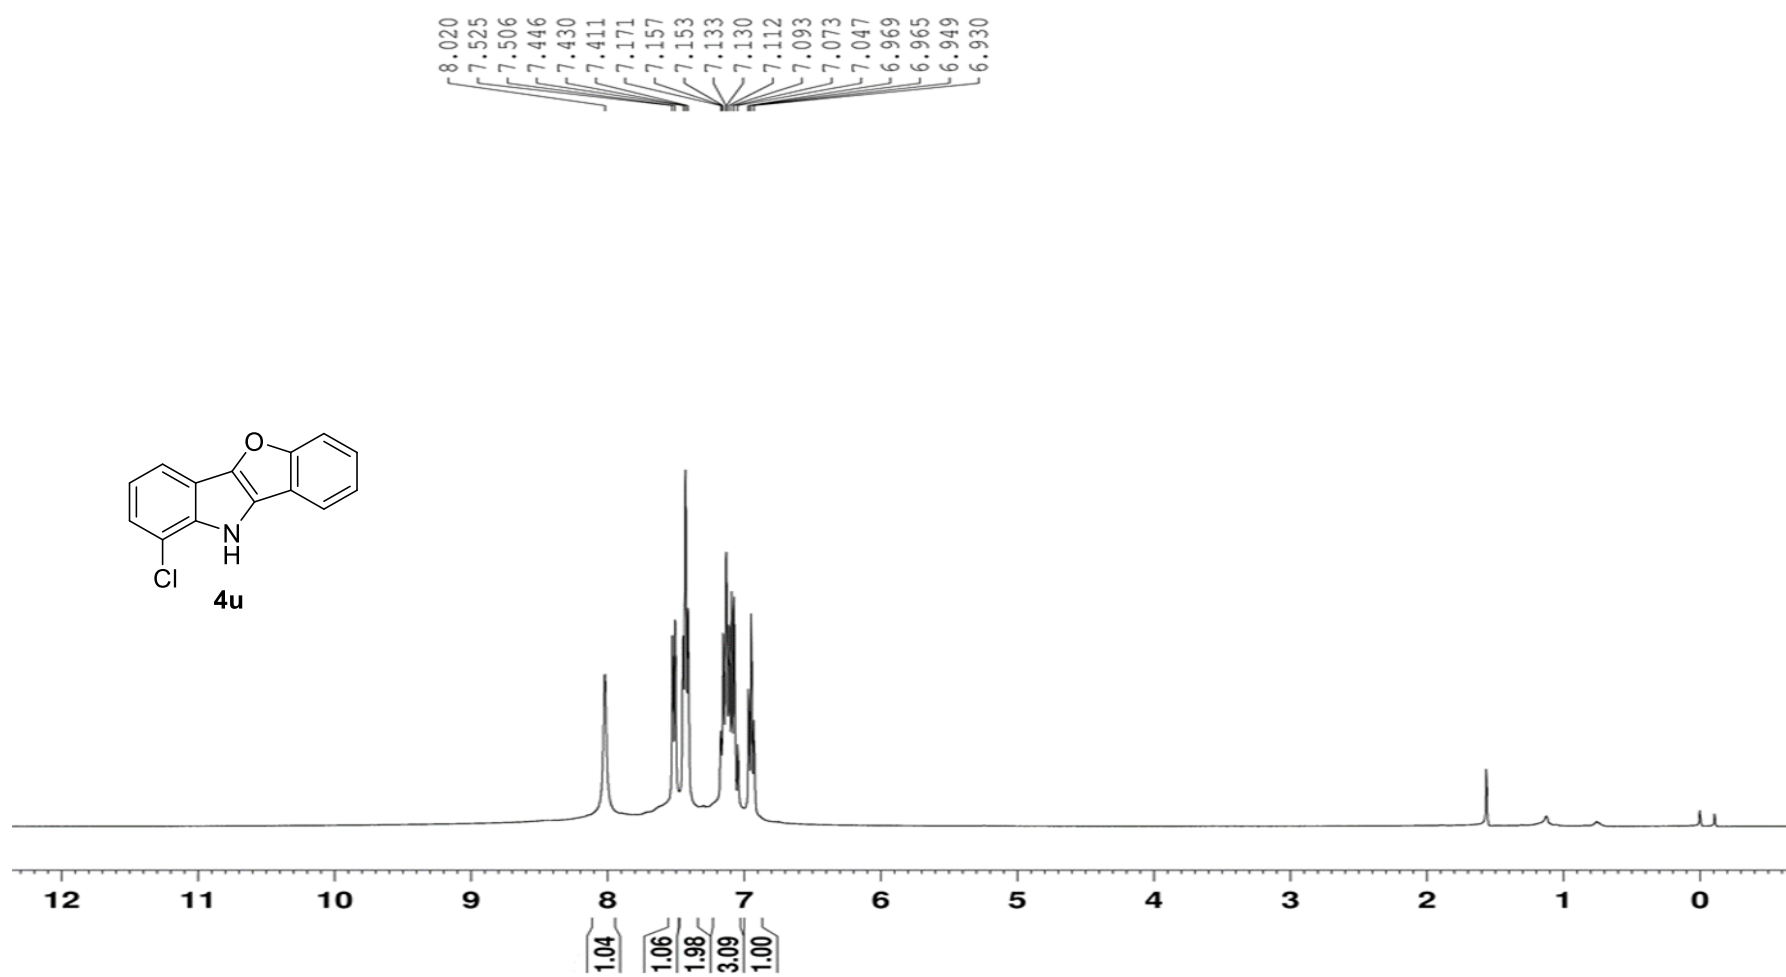

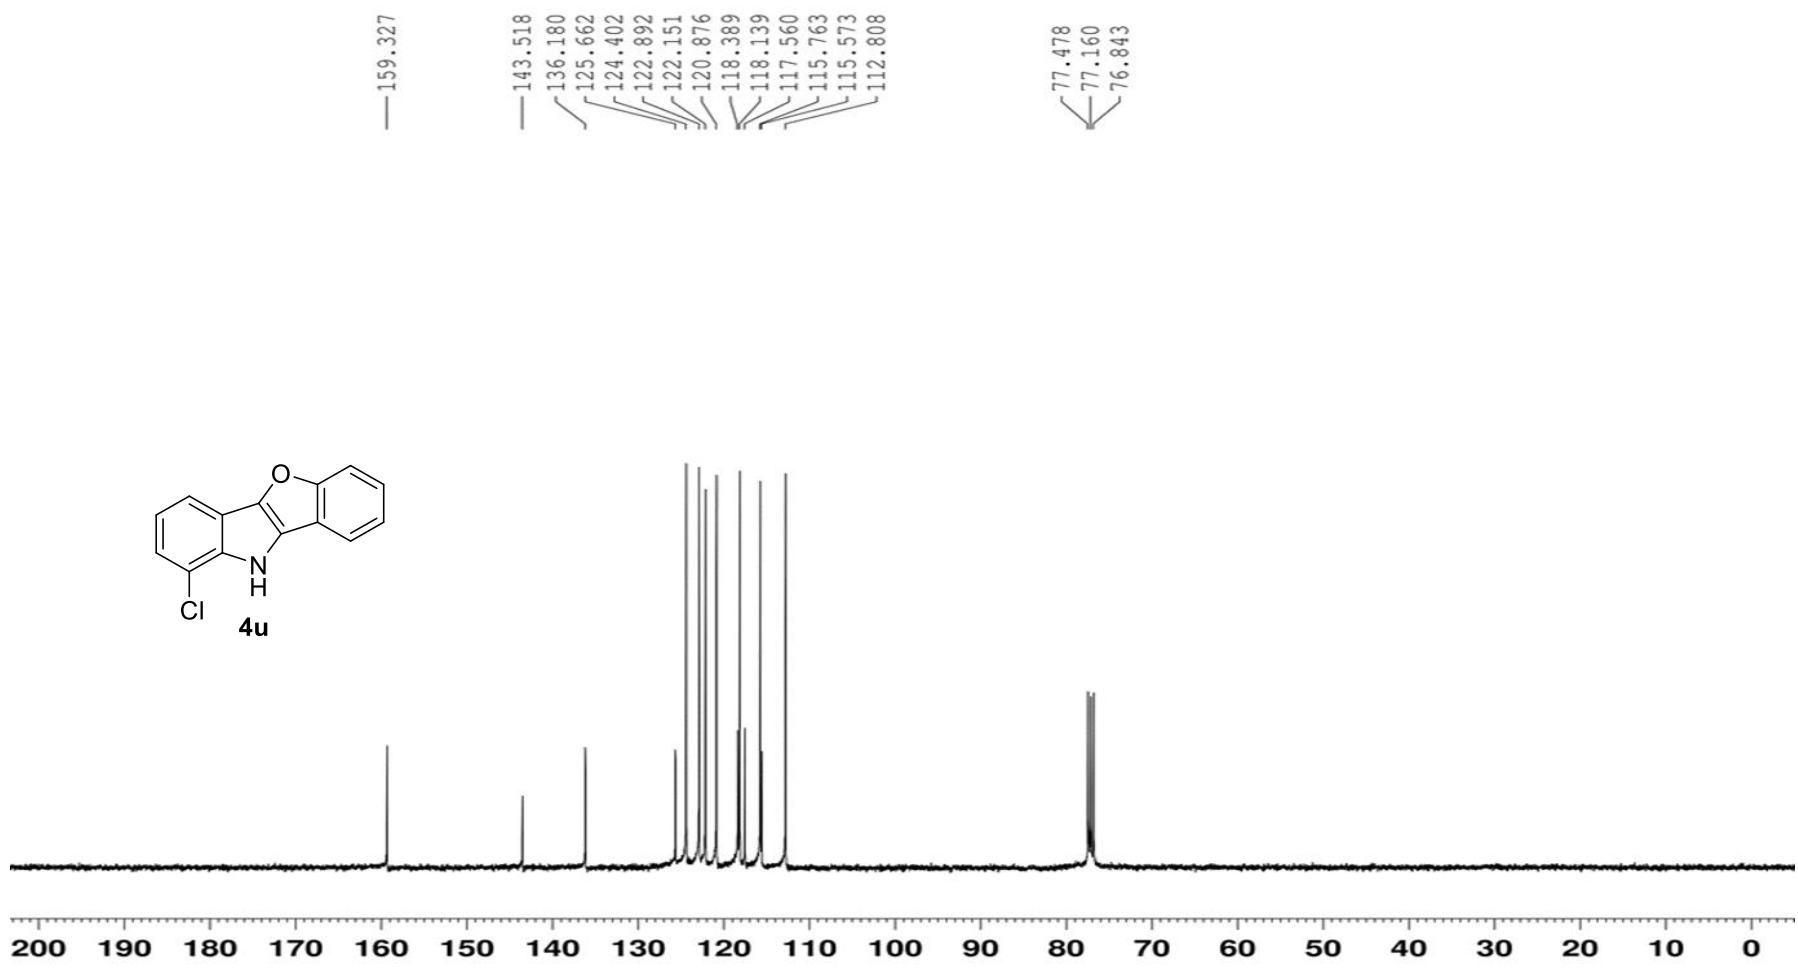

12.124

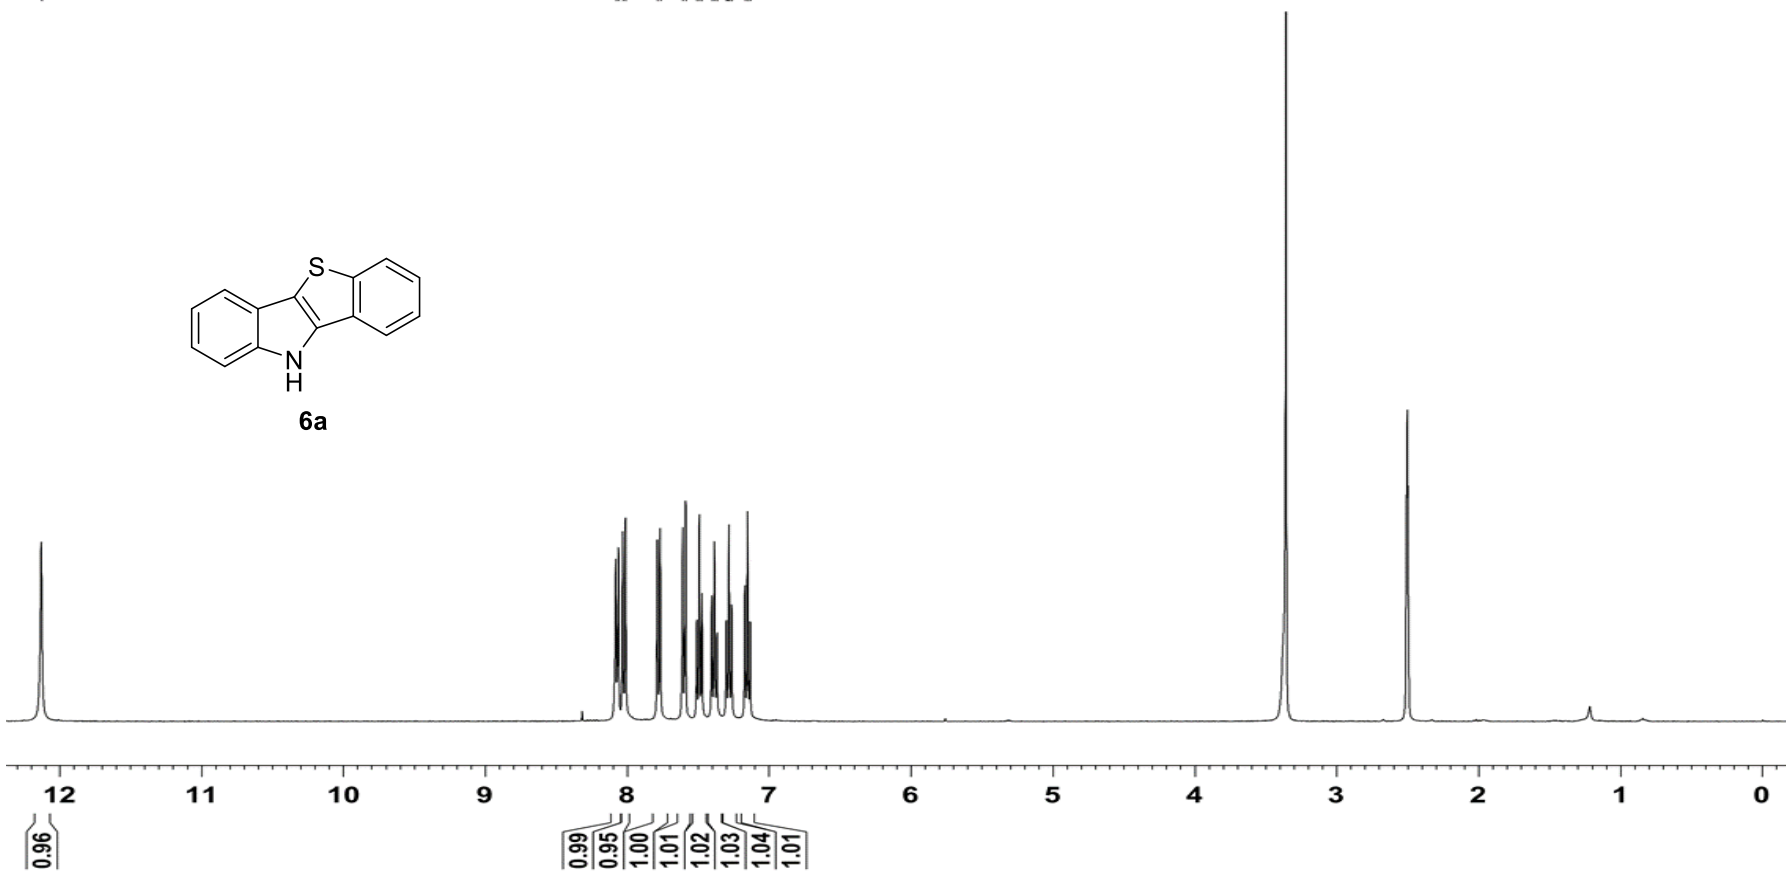

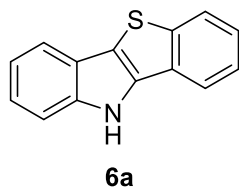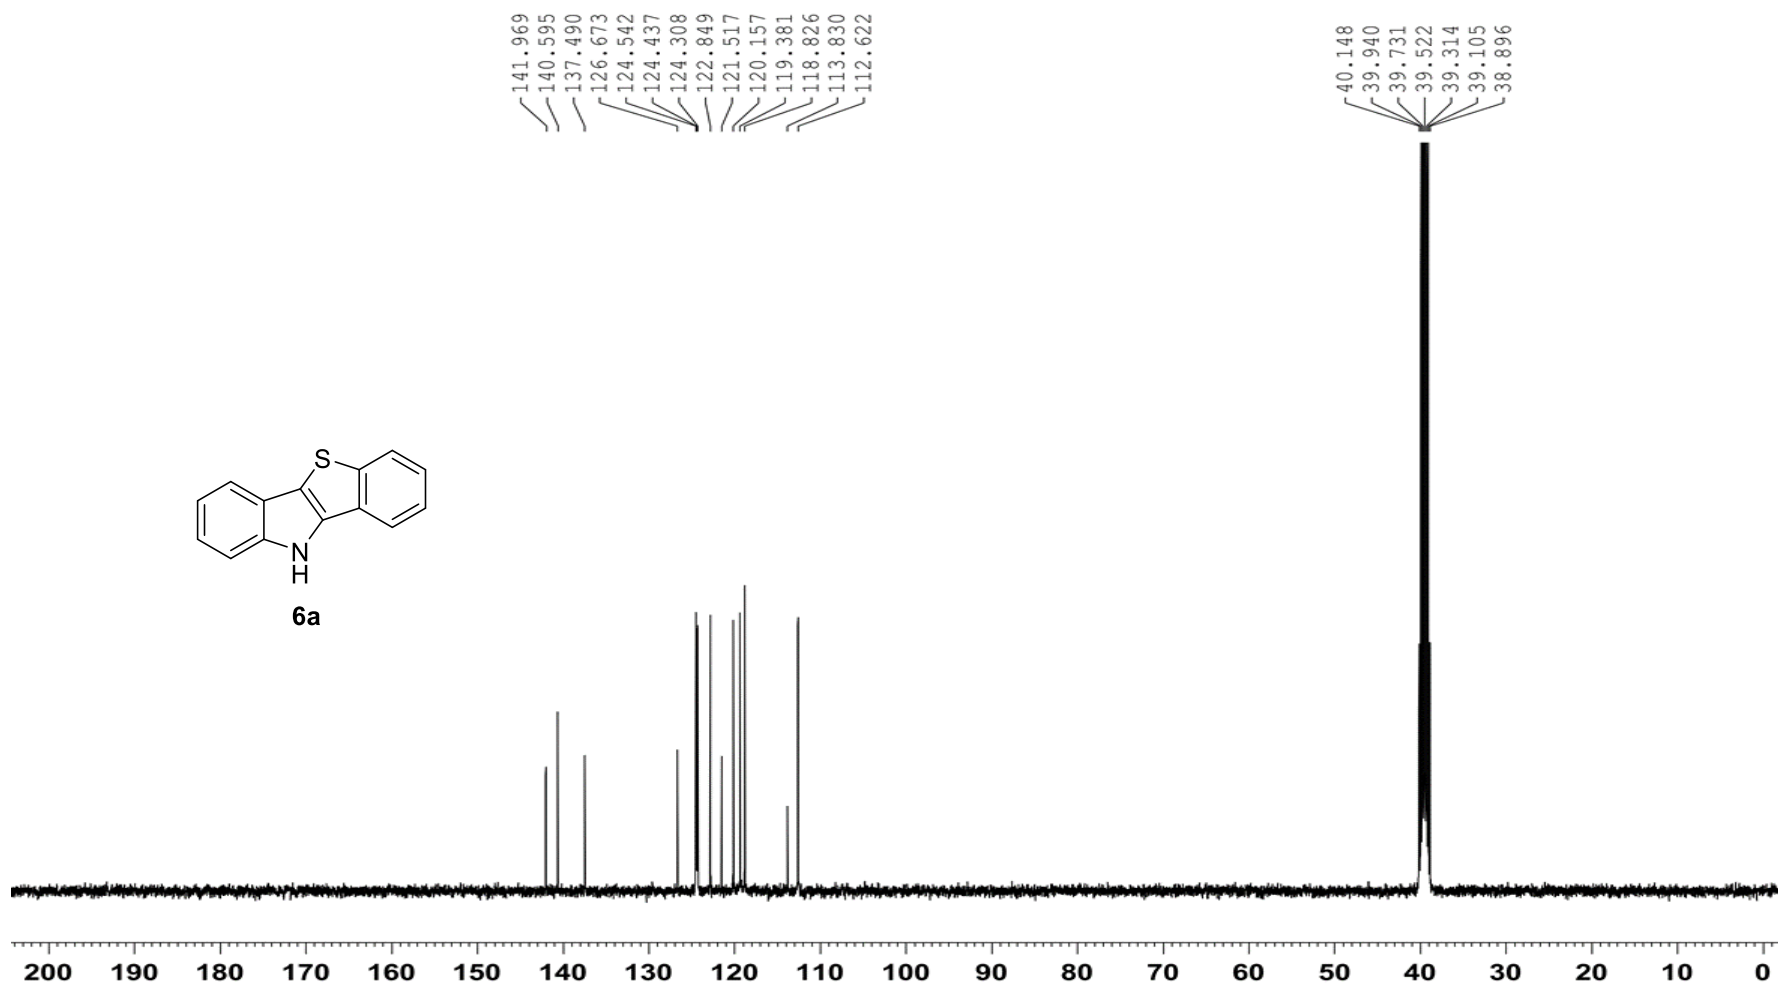

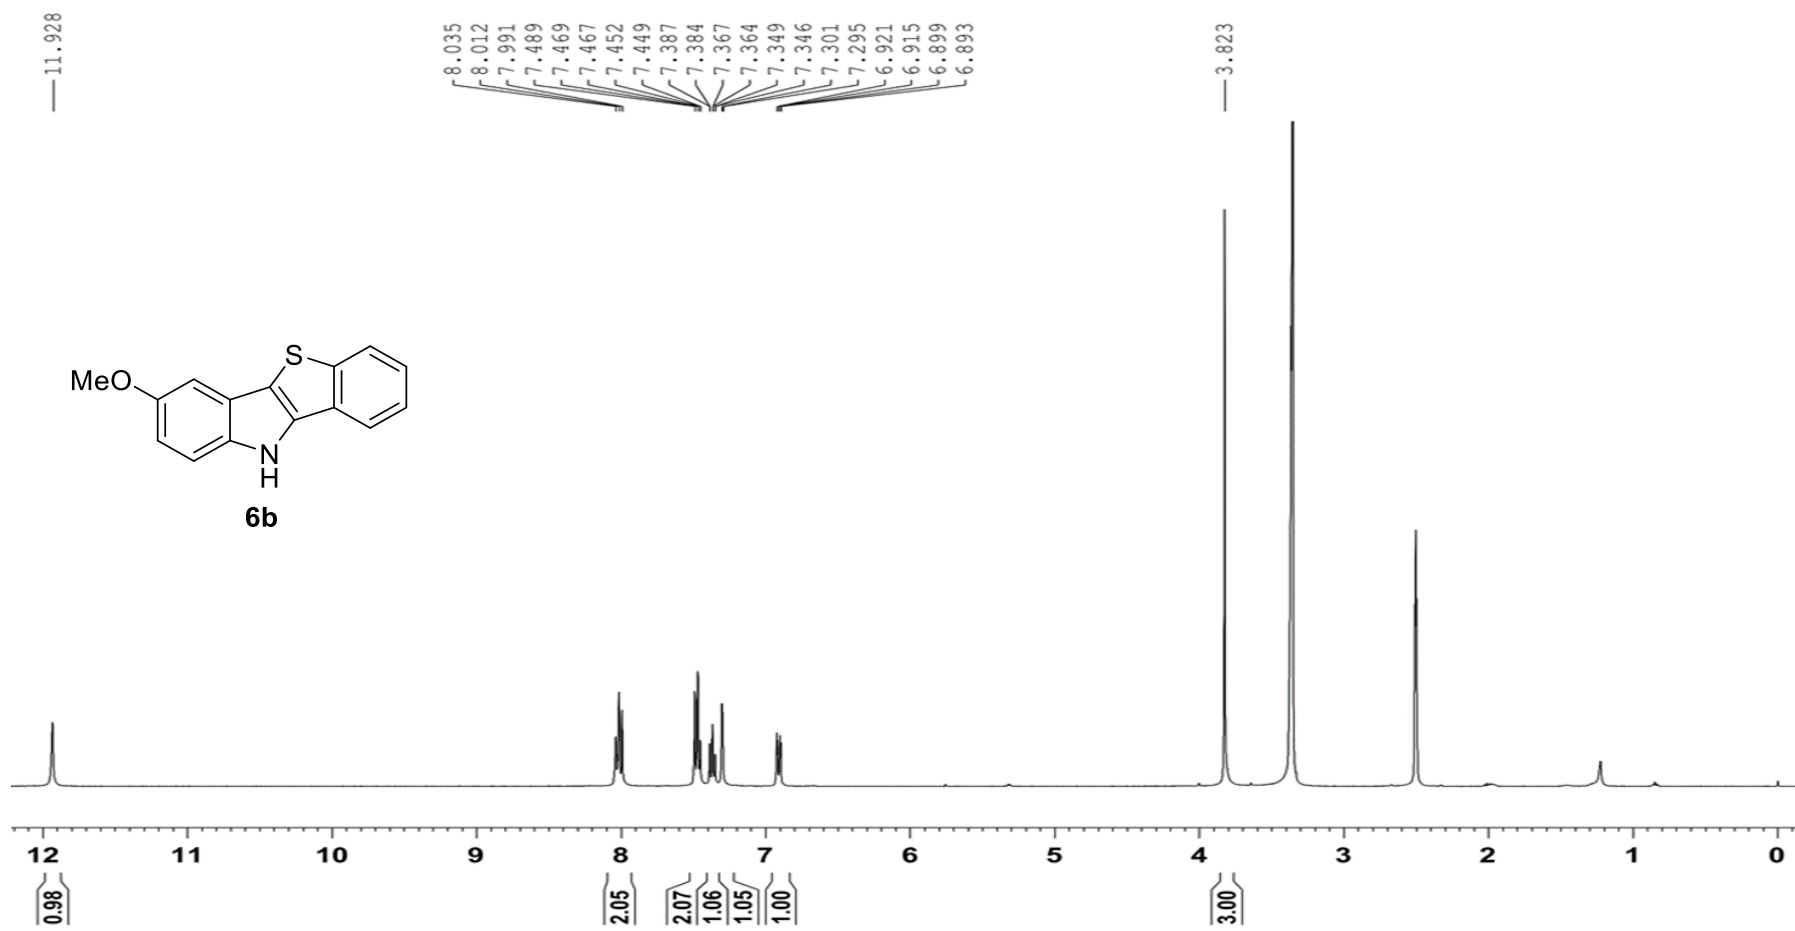

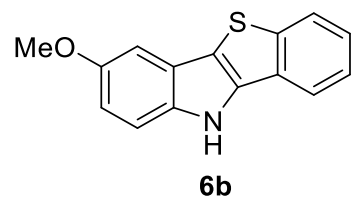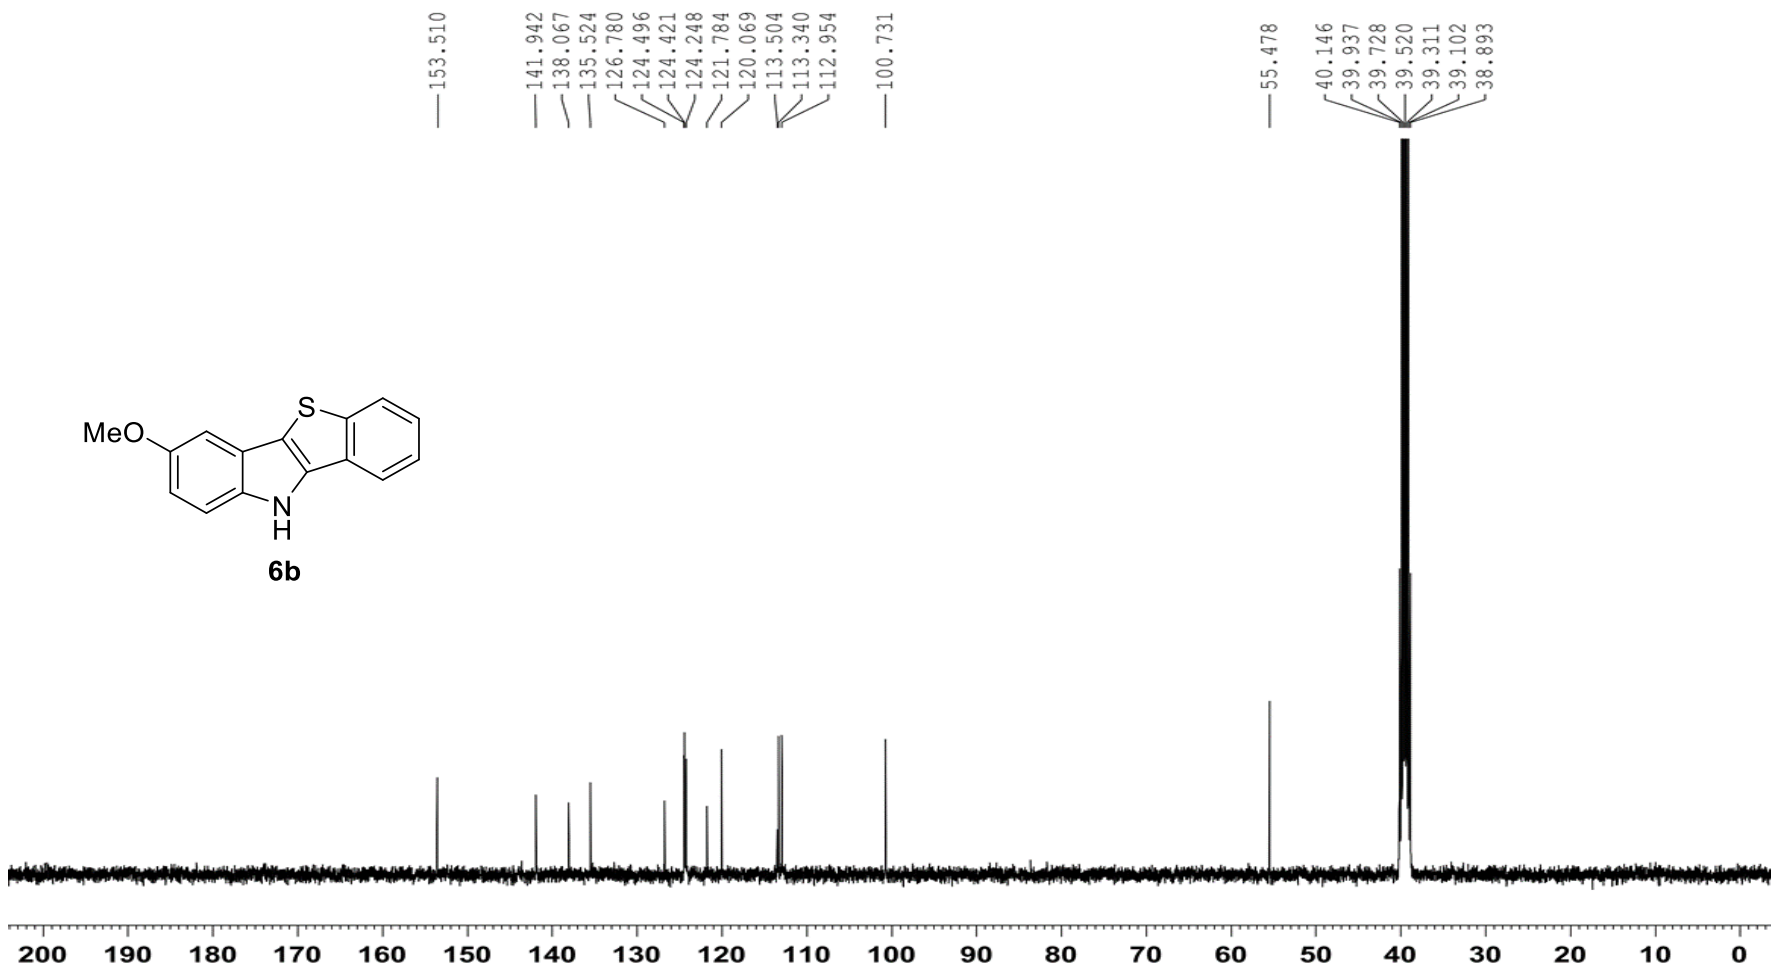

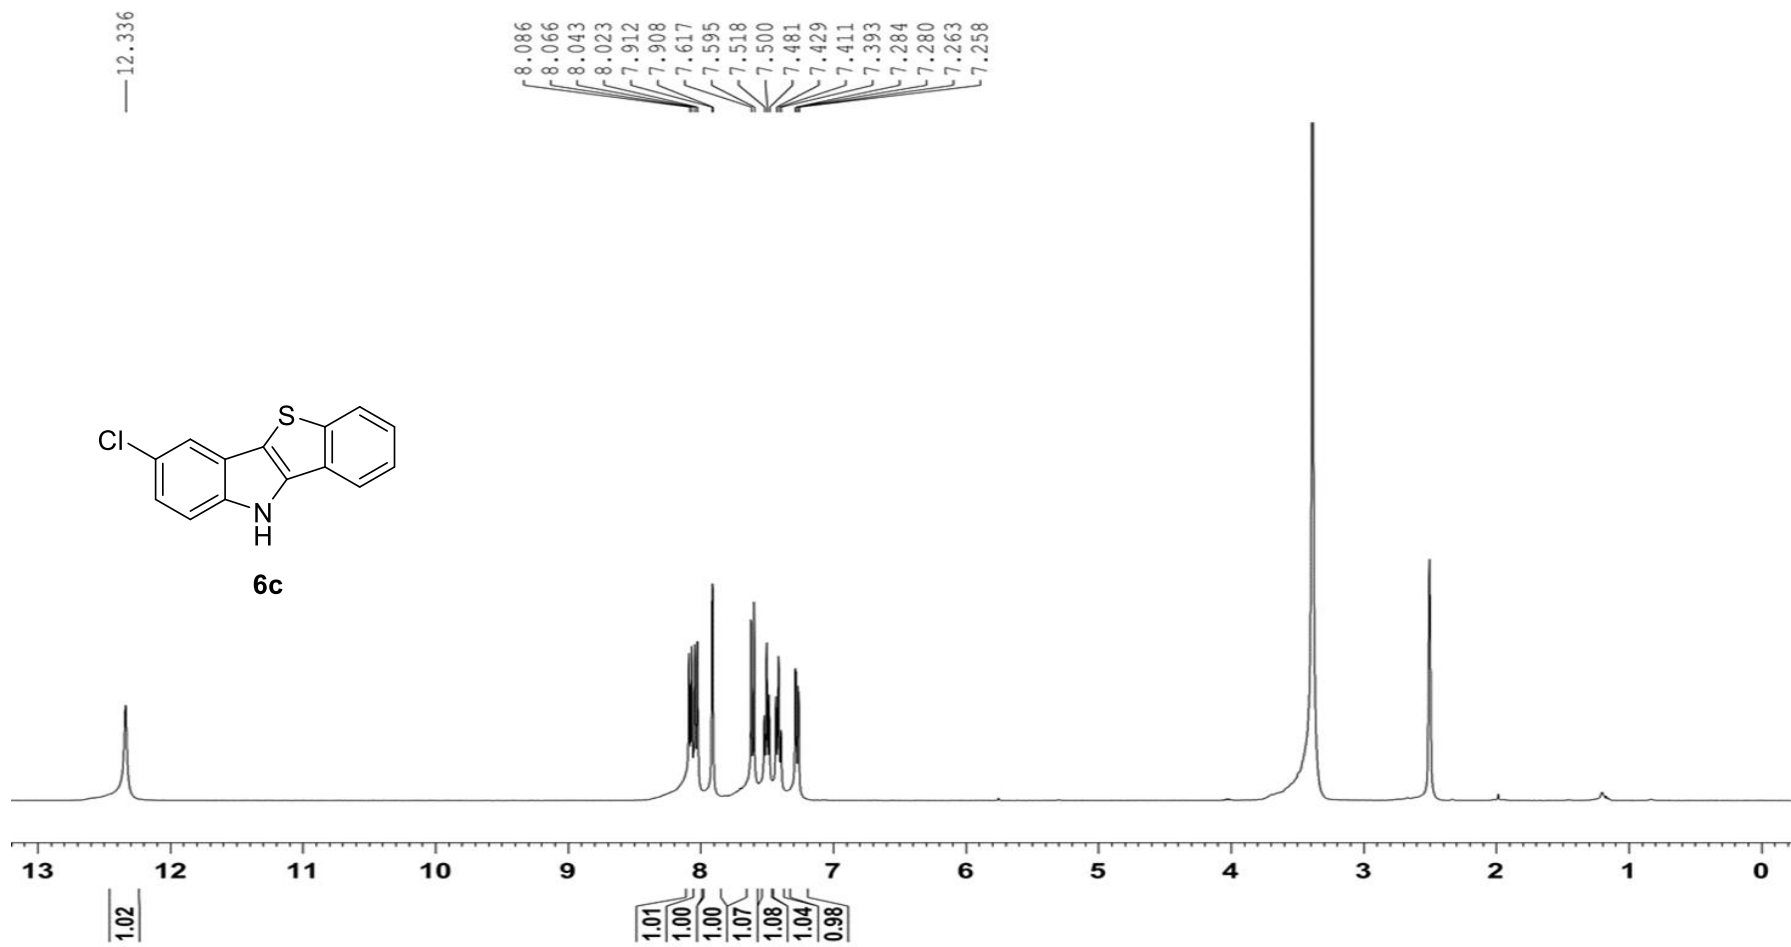



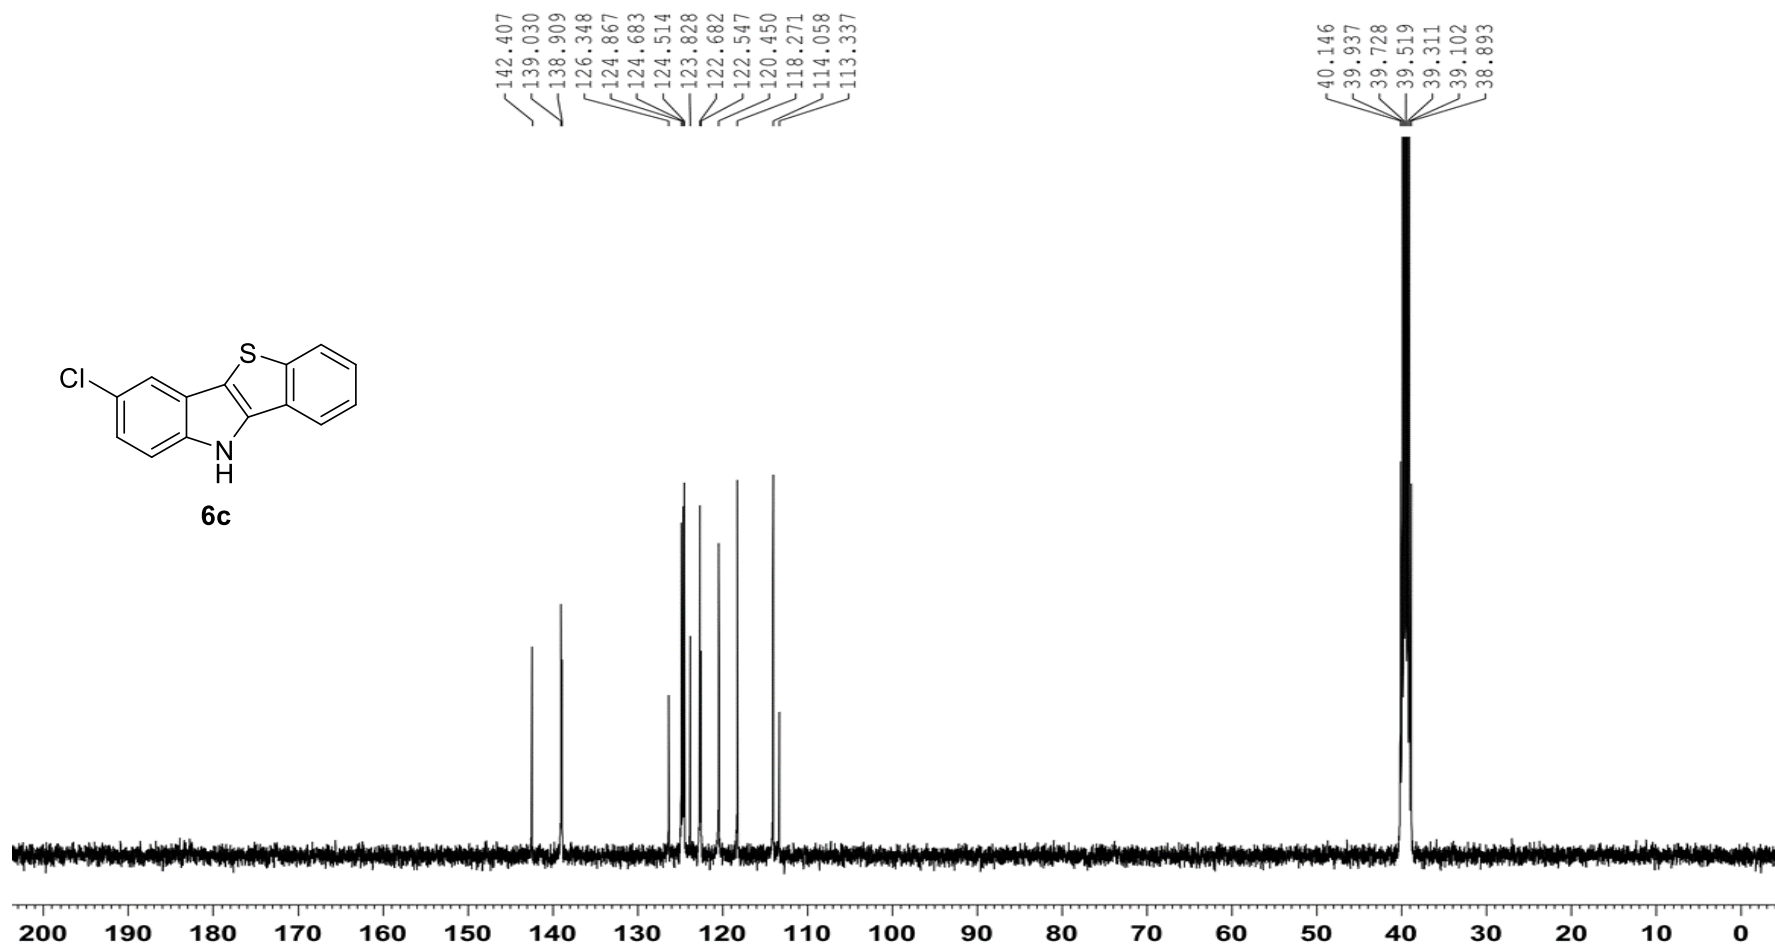

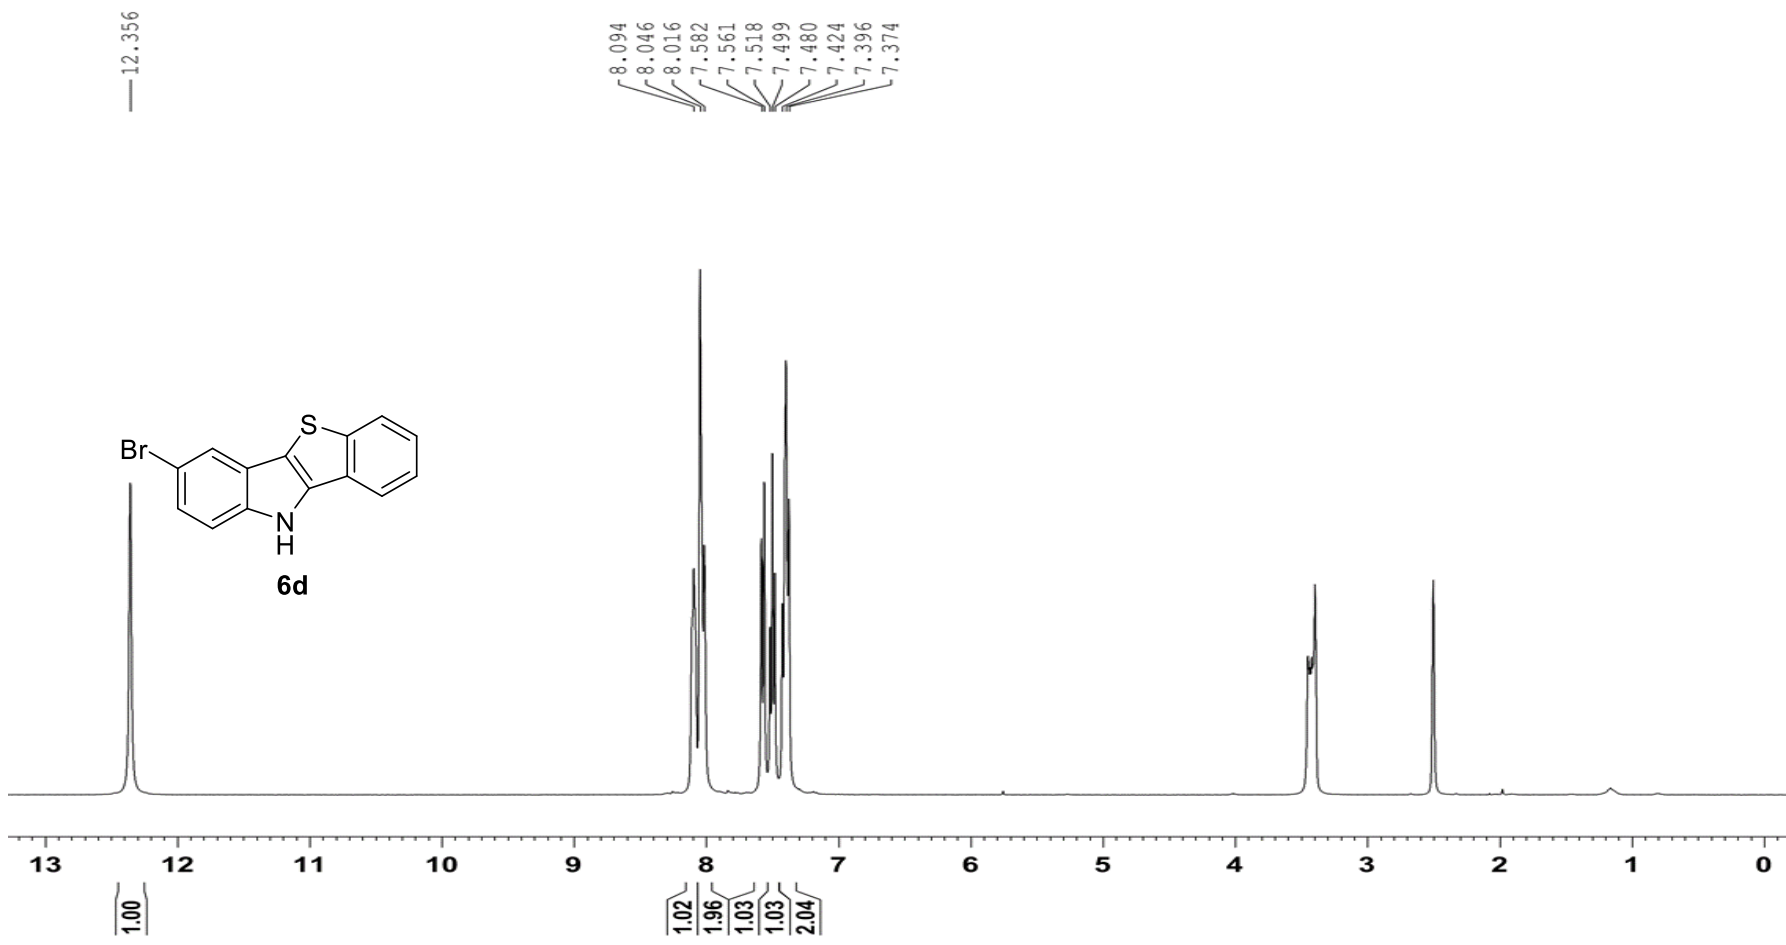

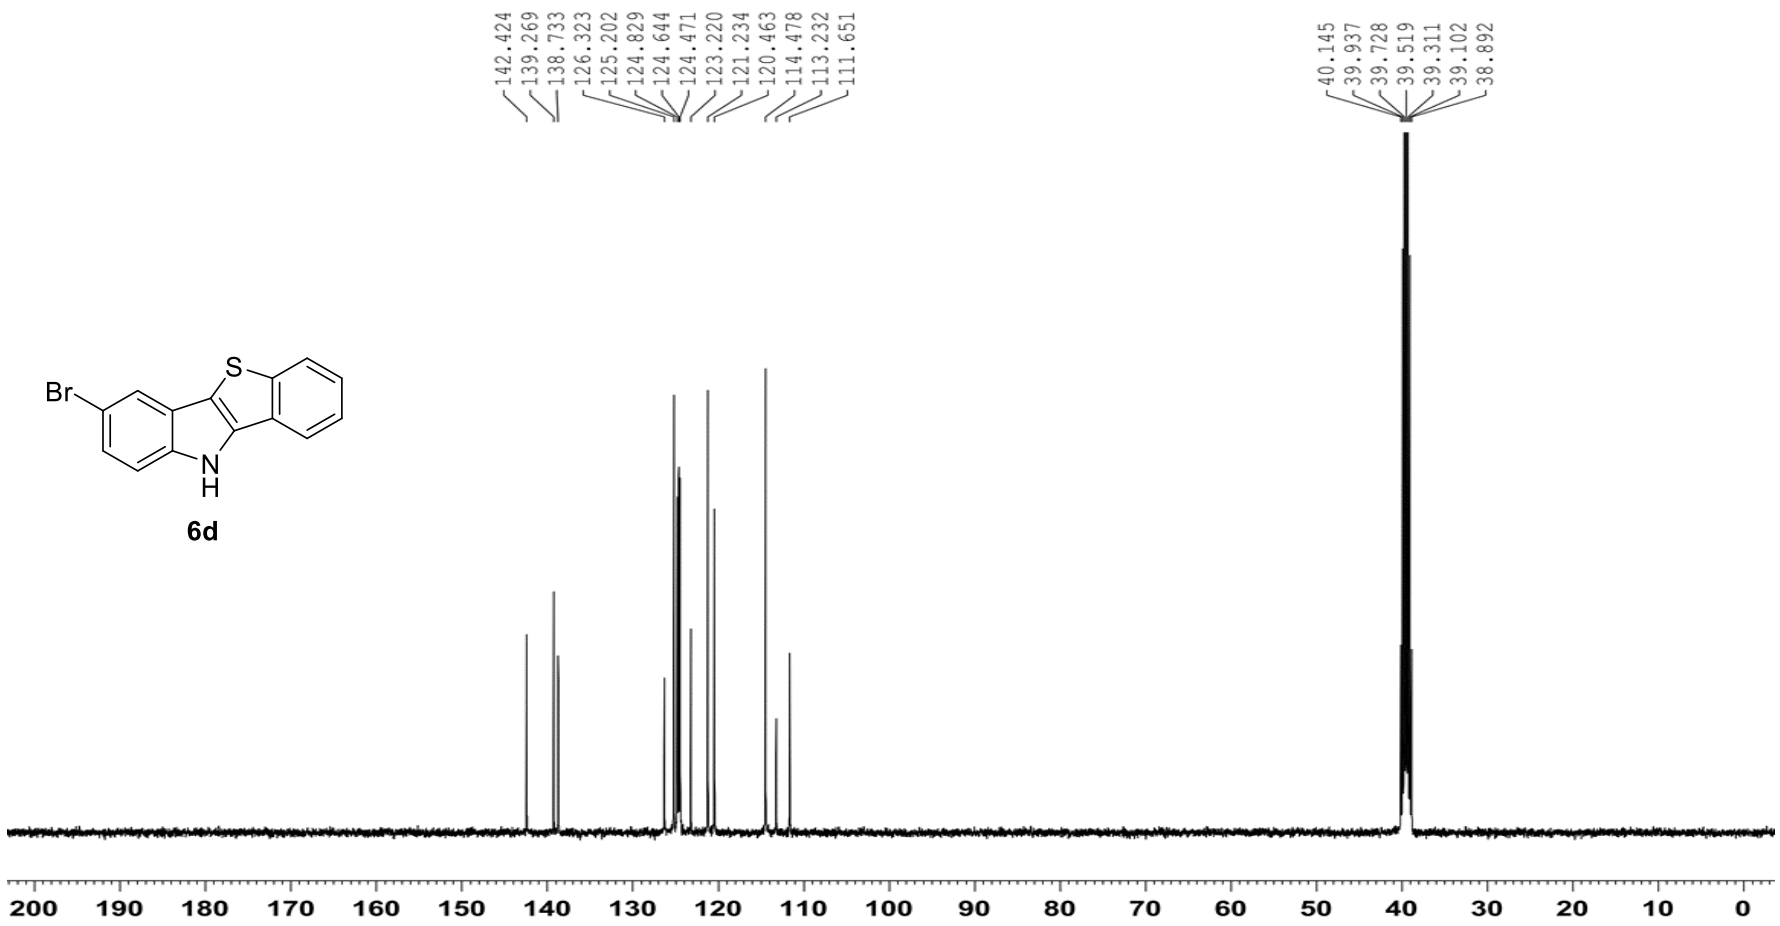

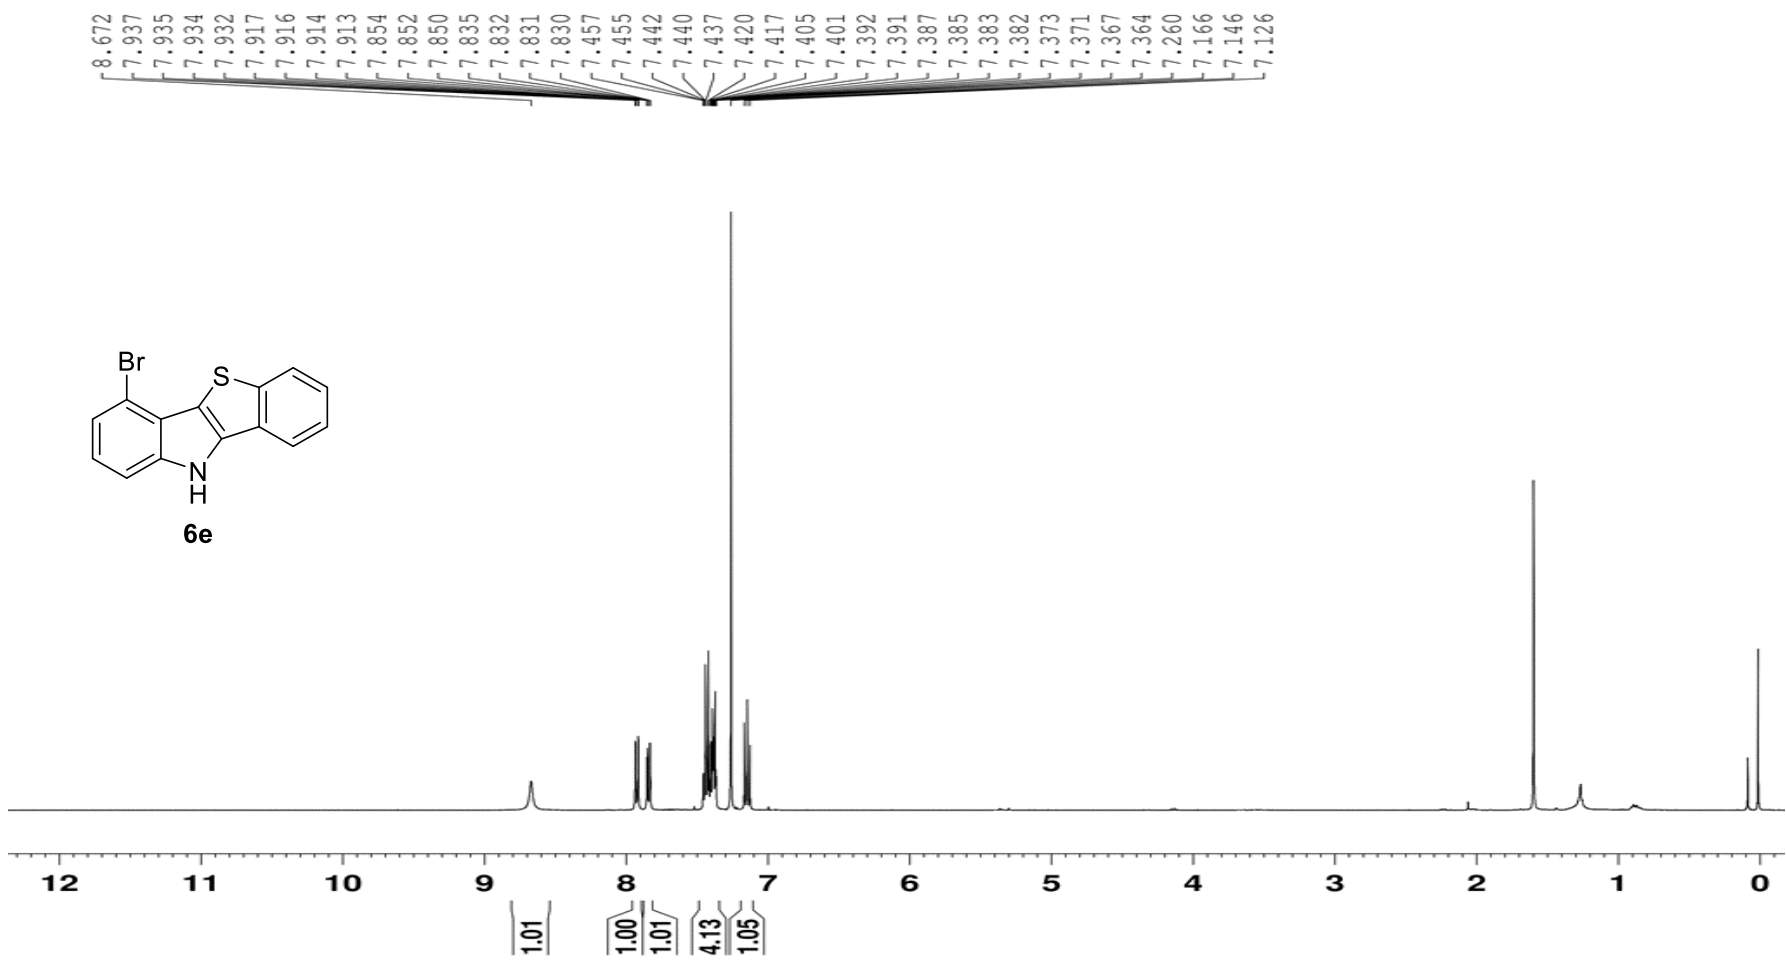

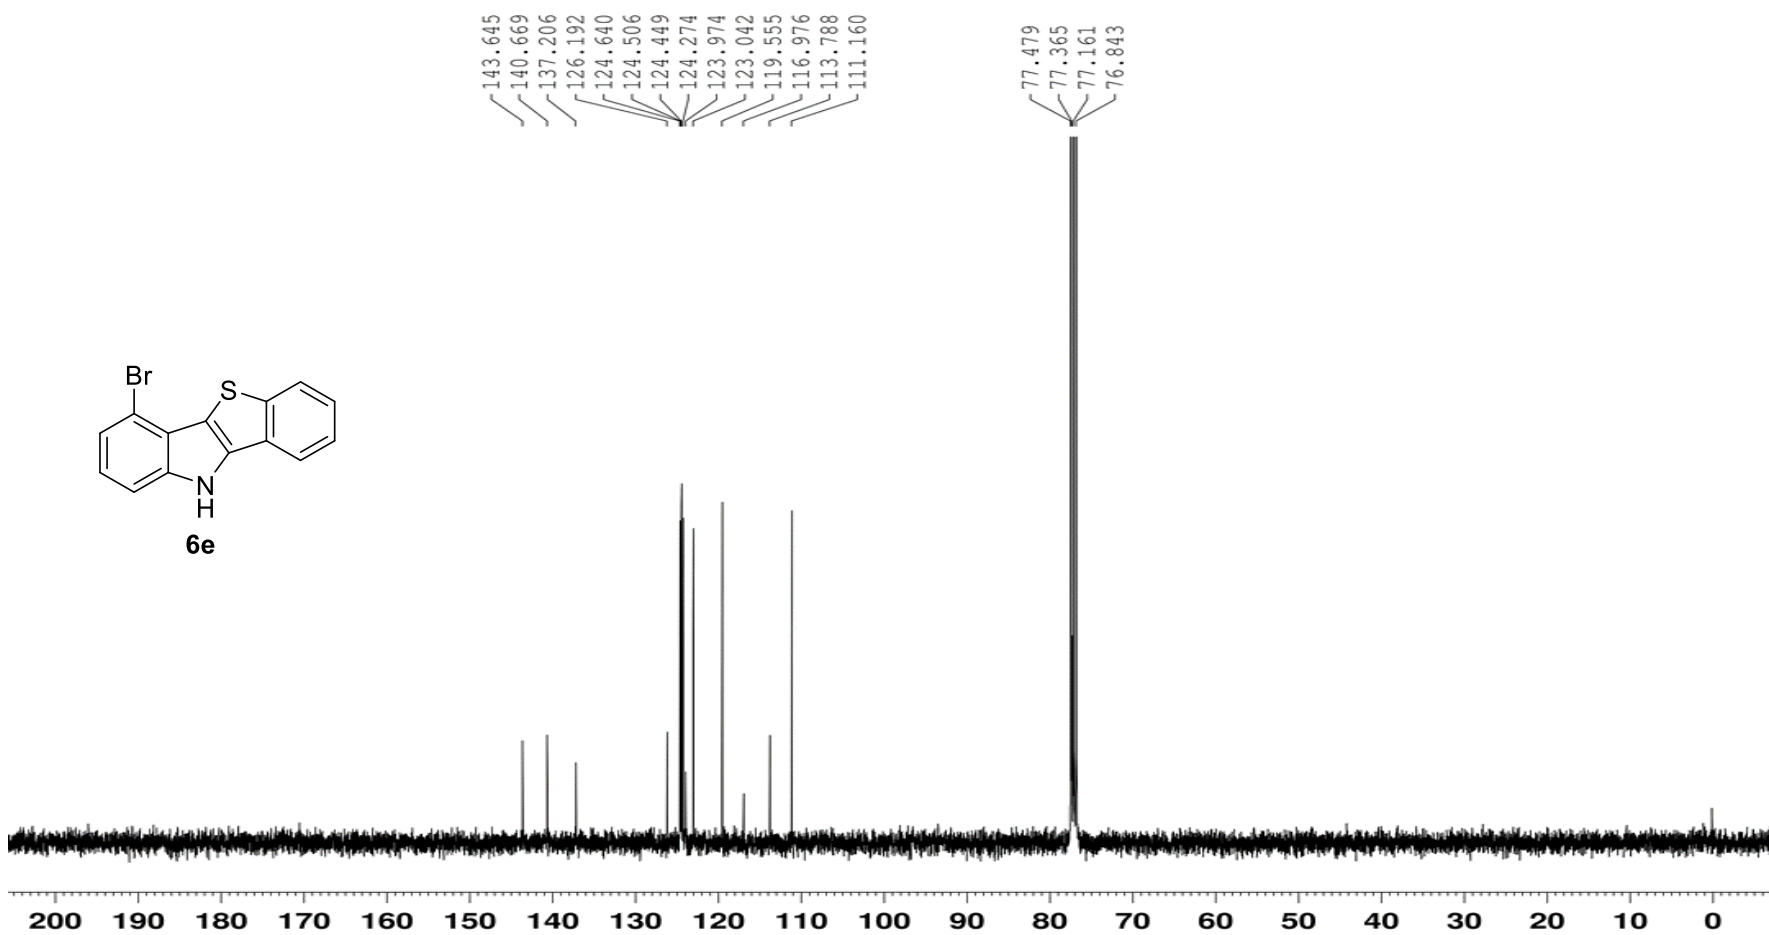

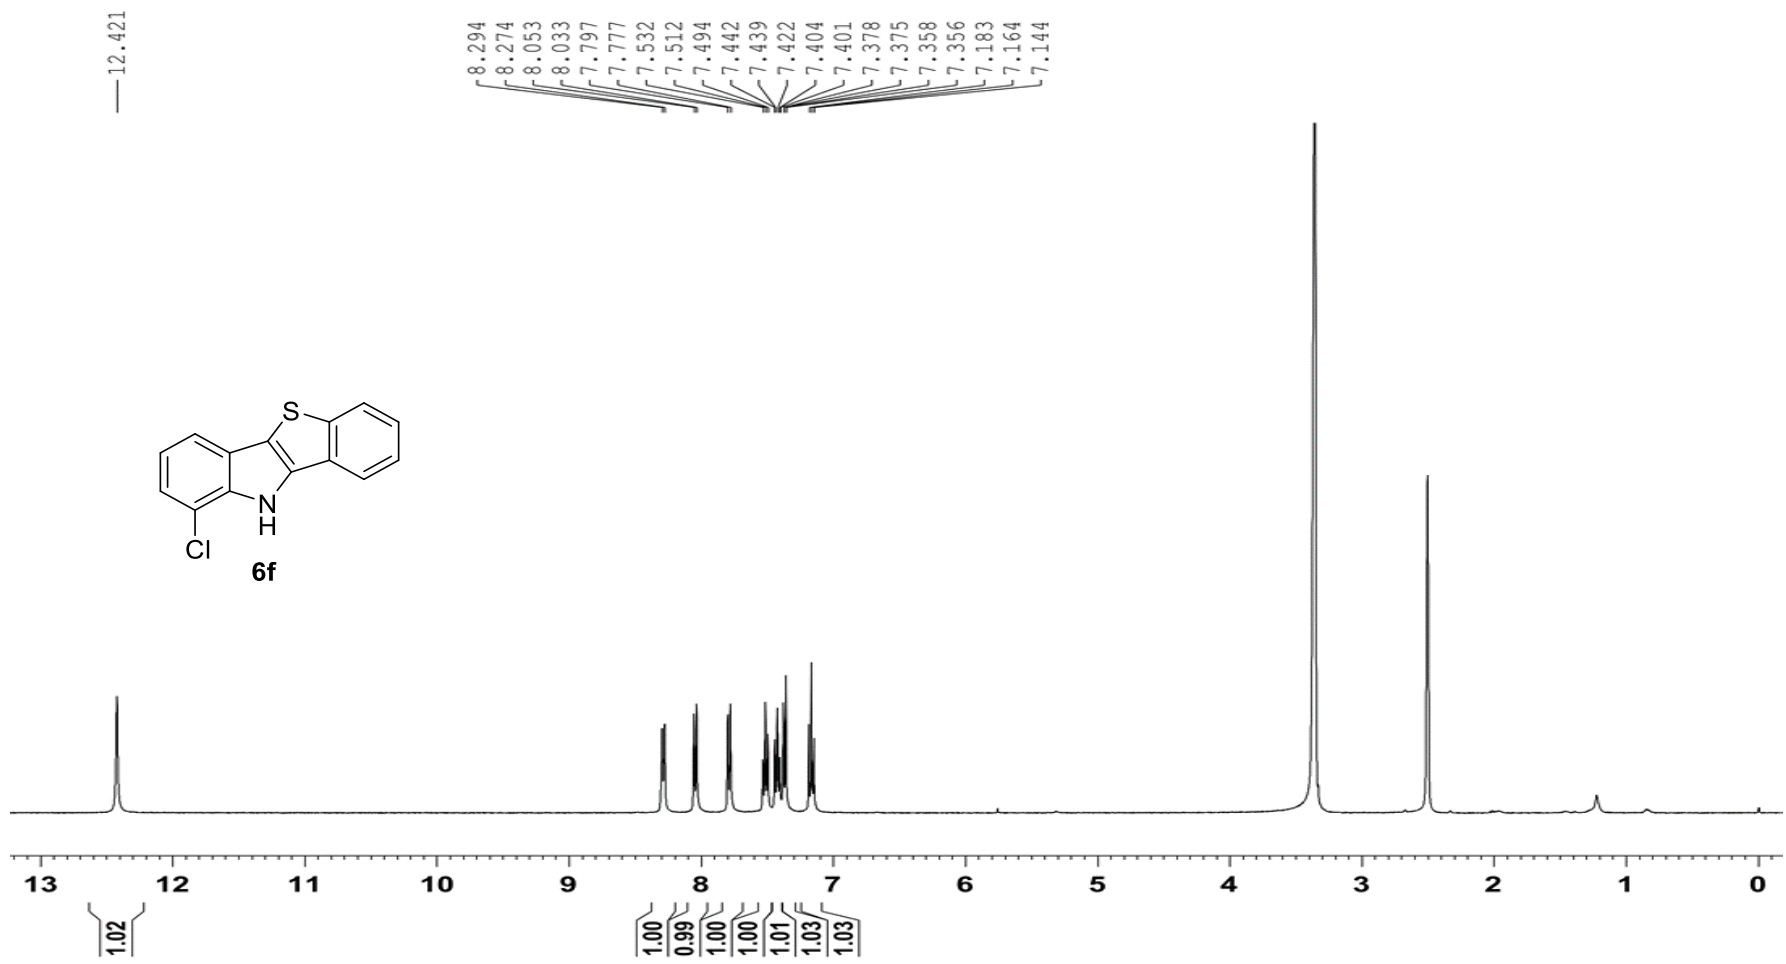

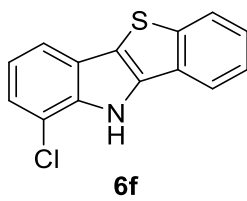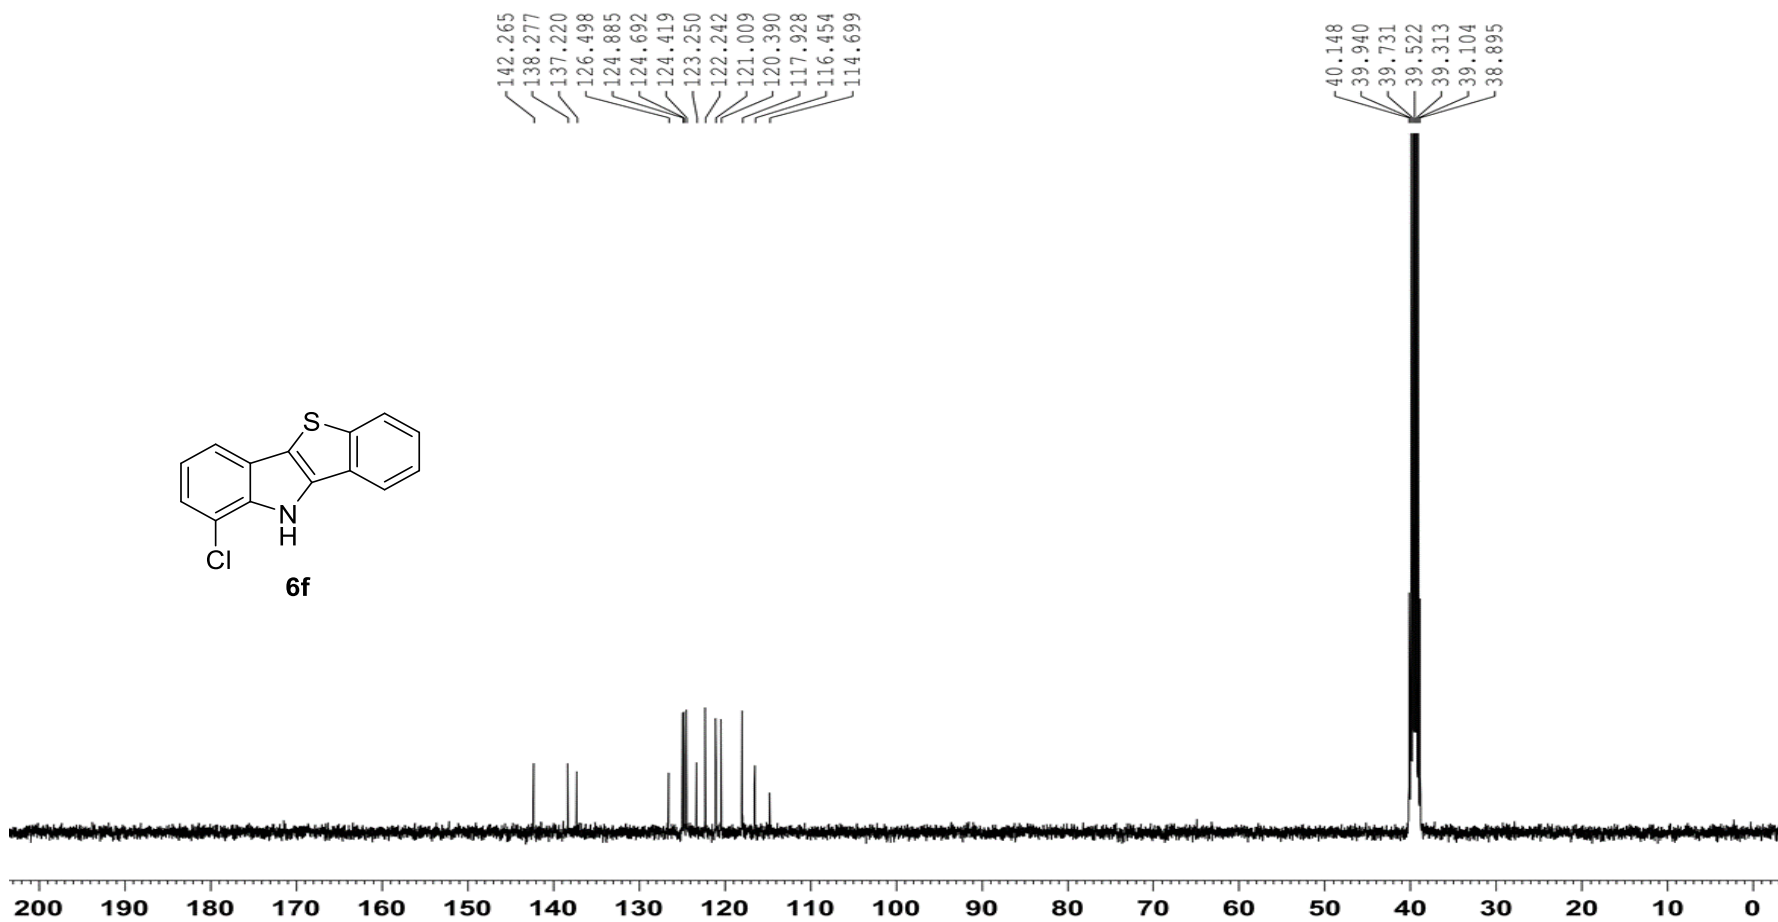

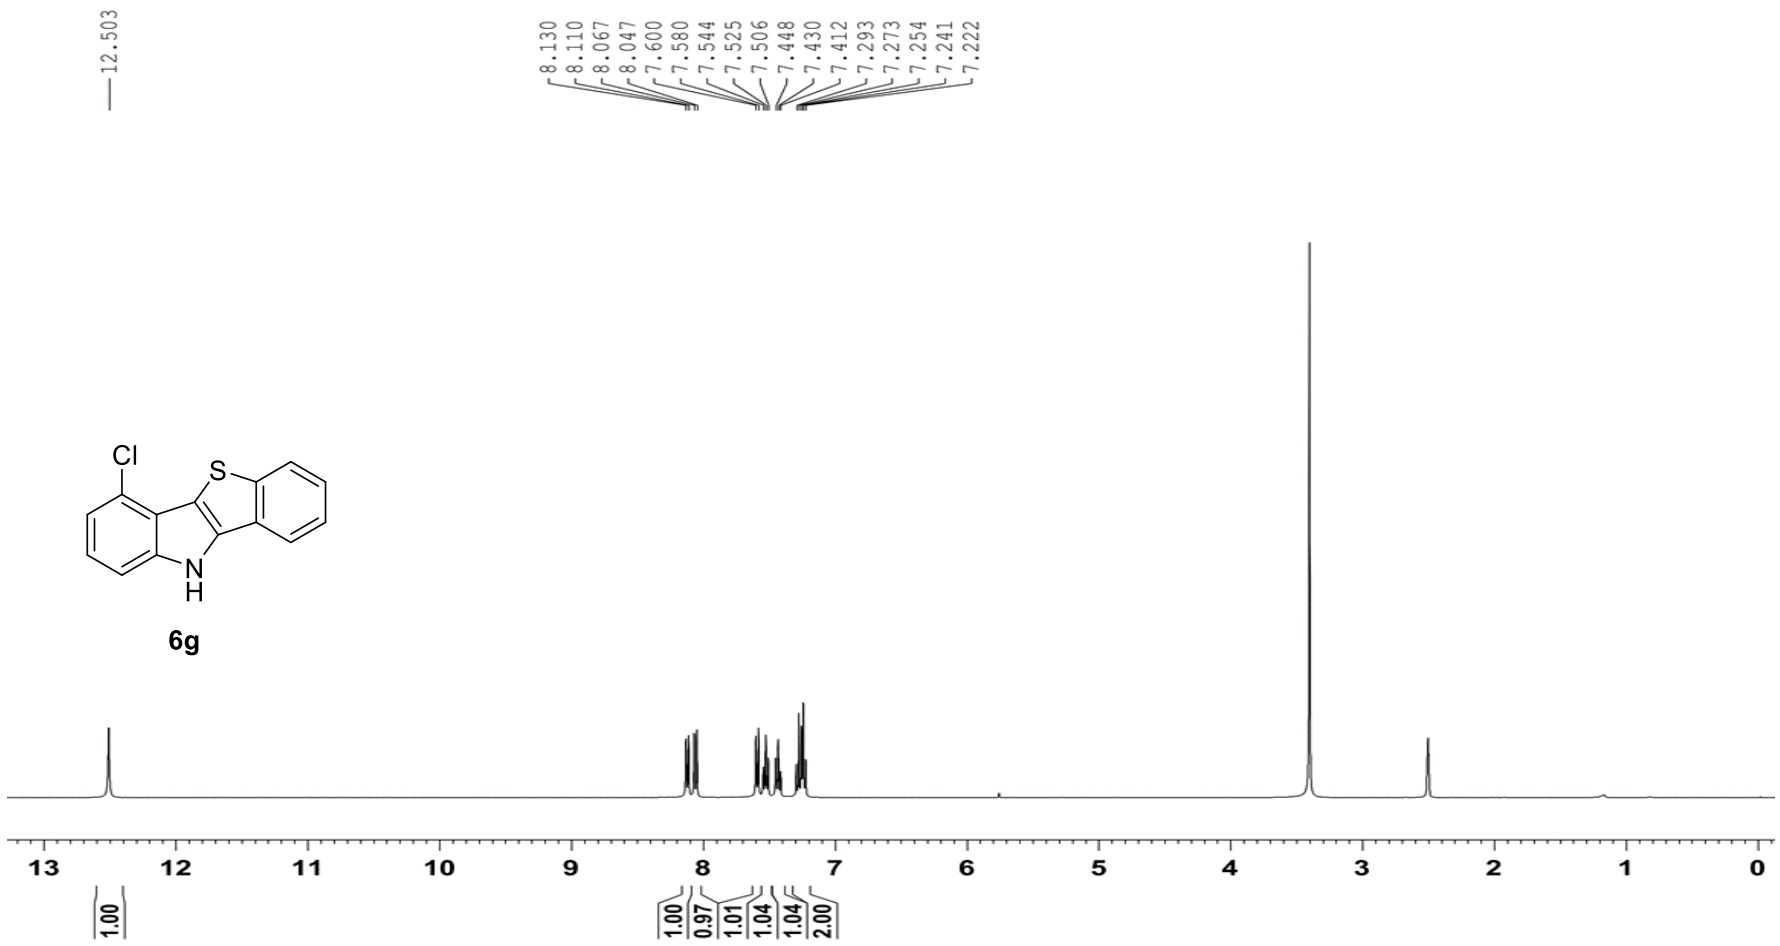



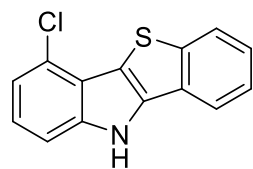

6g

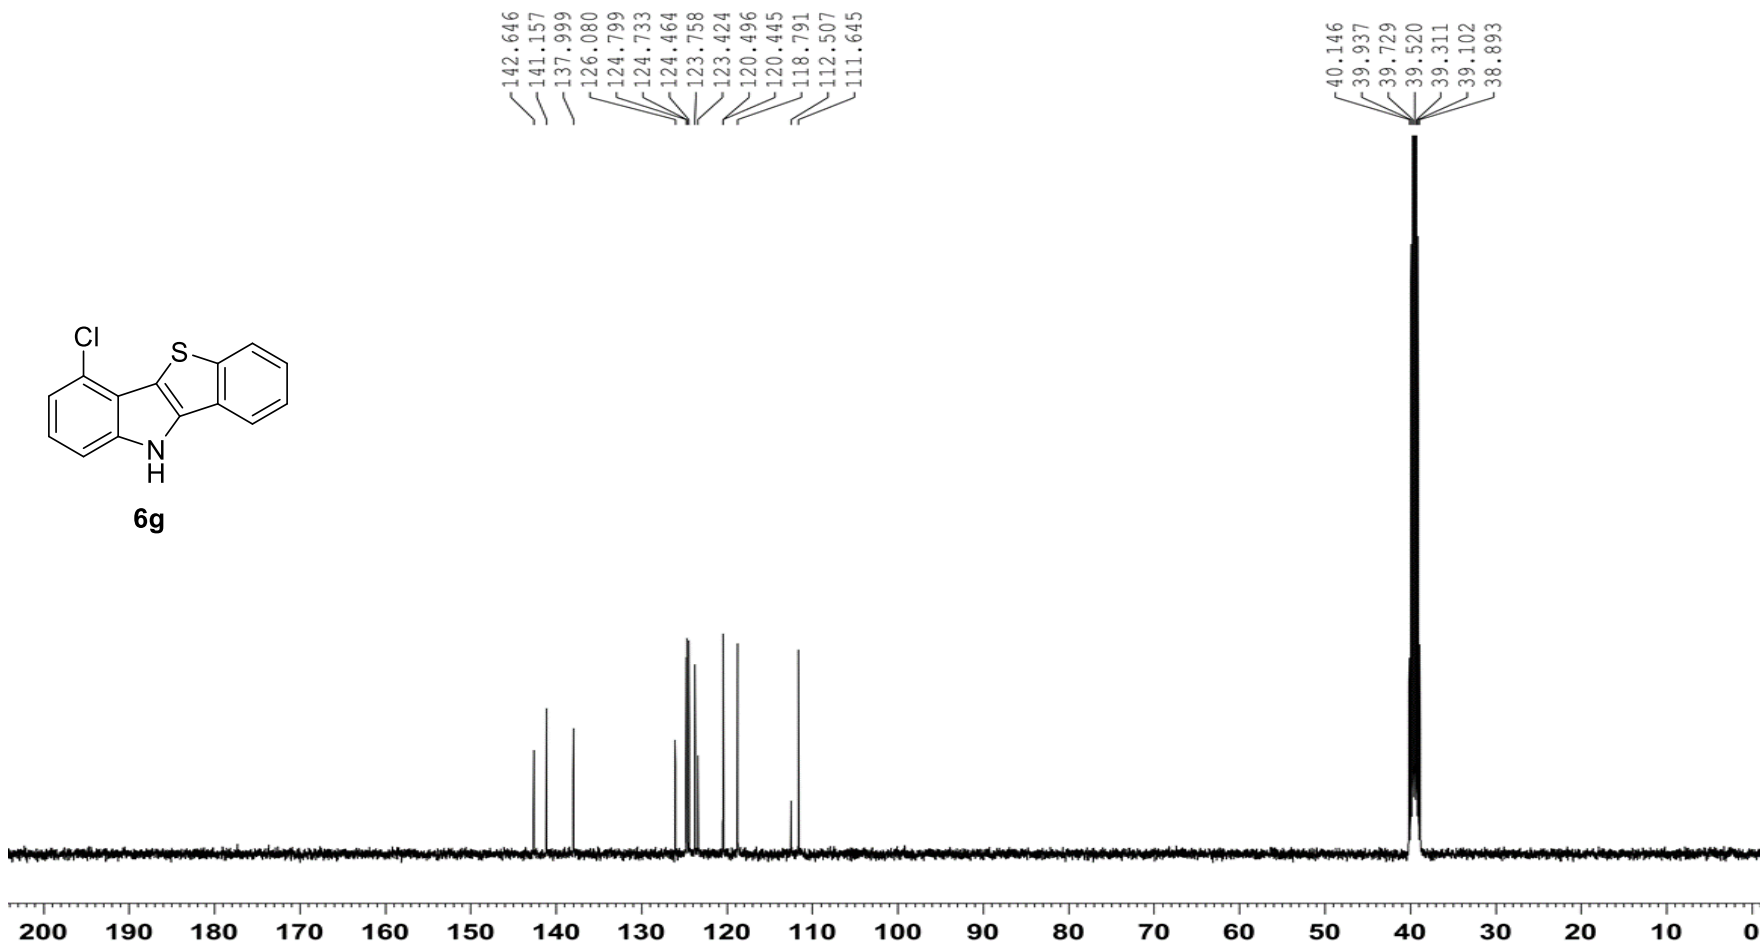

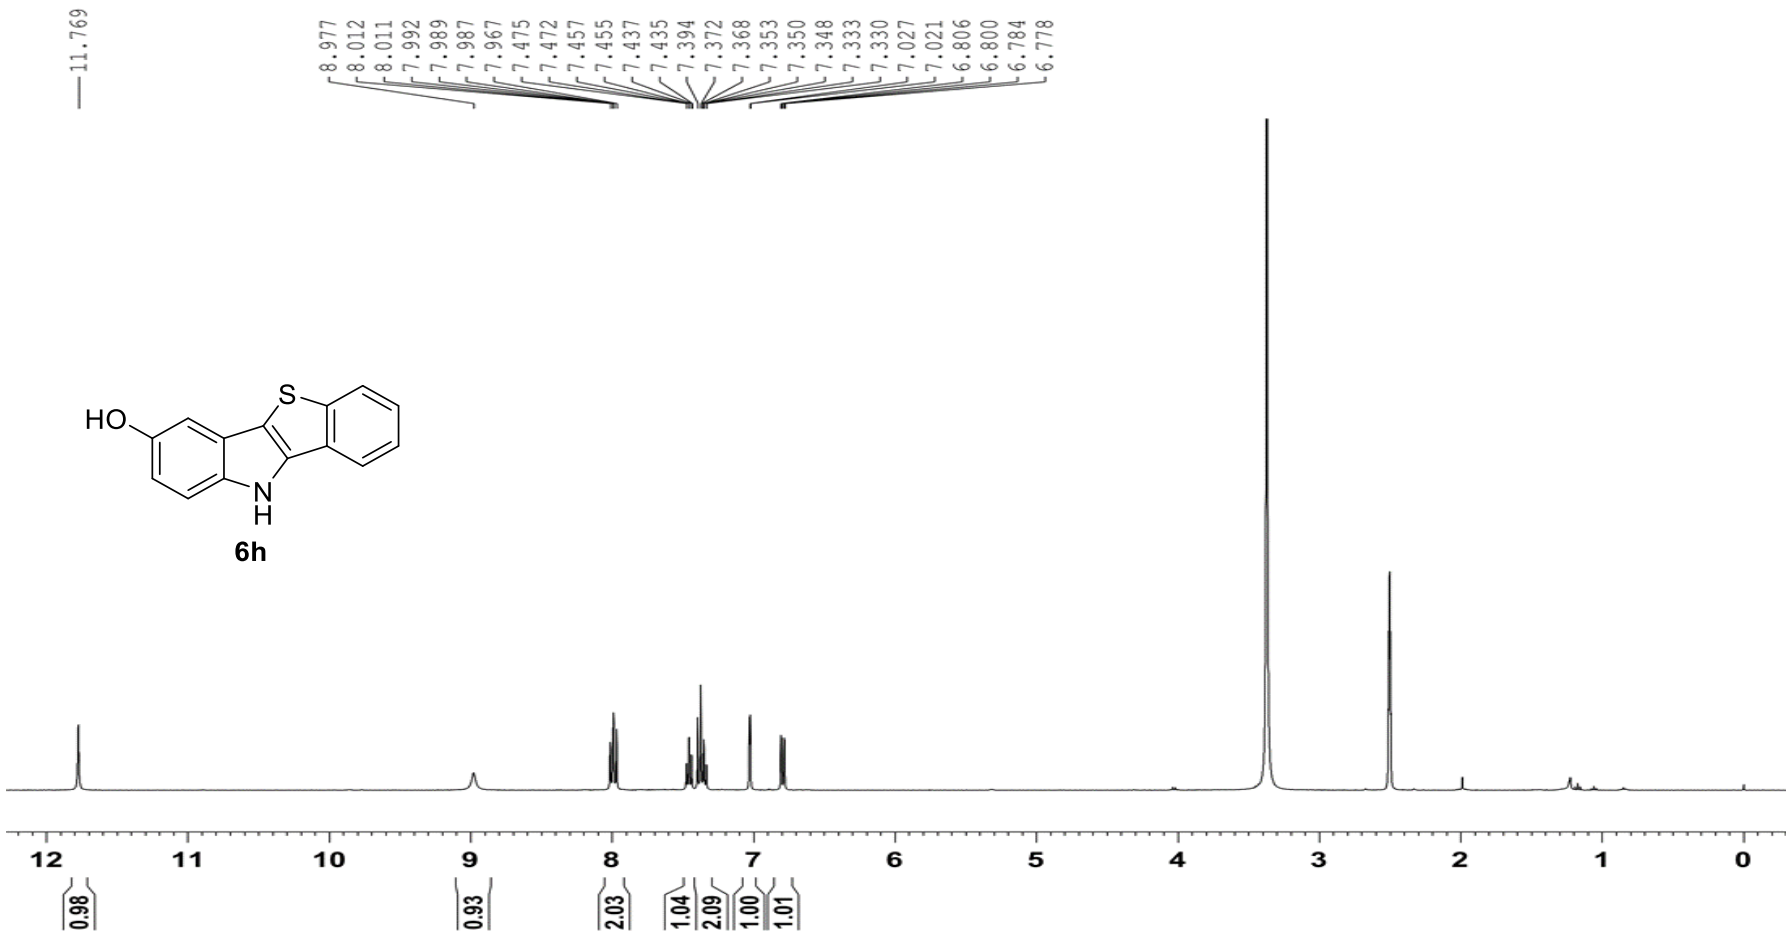

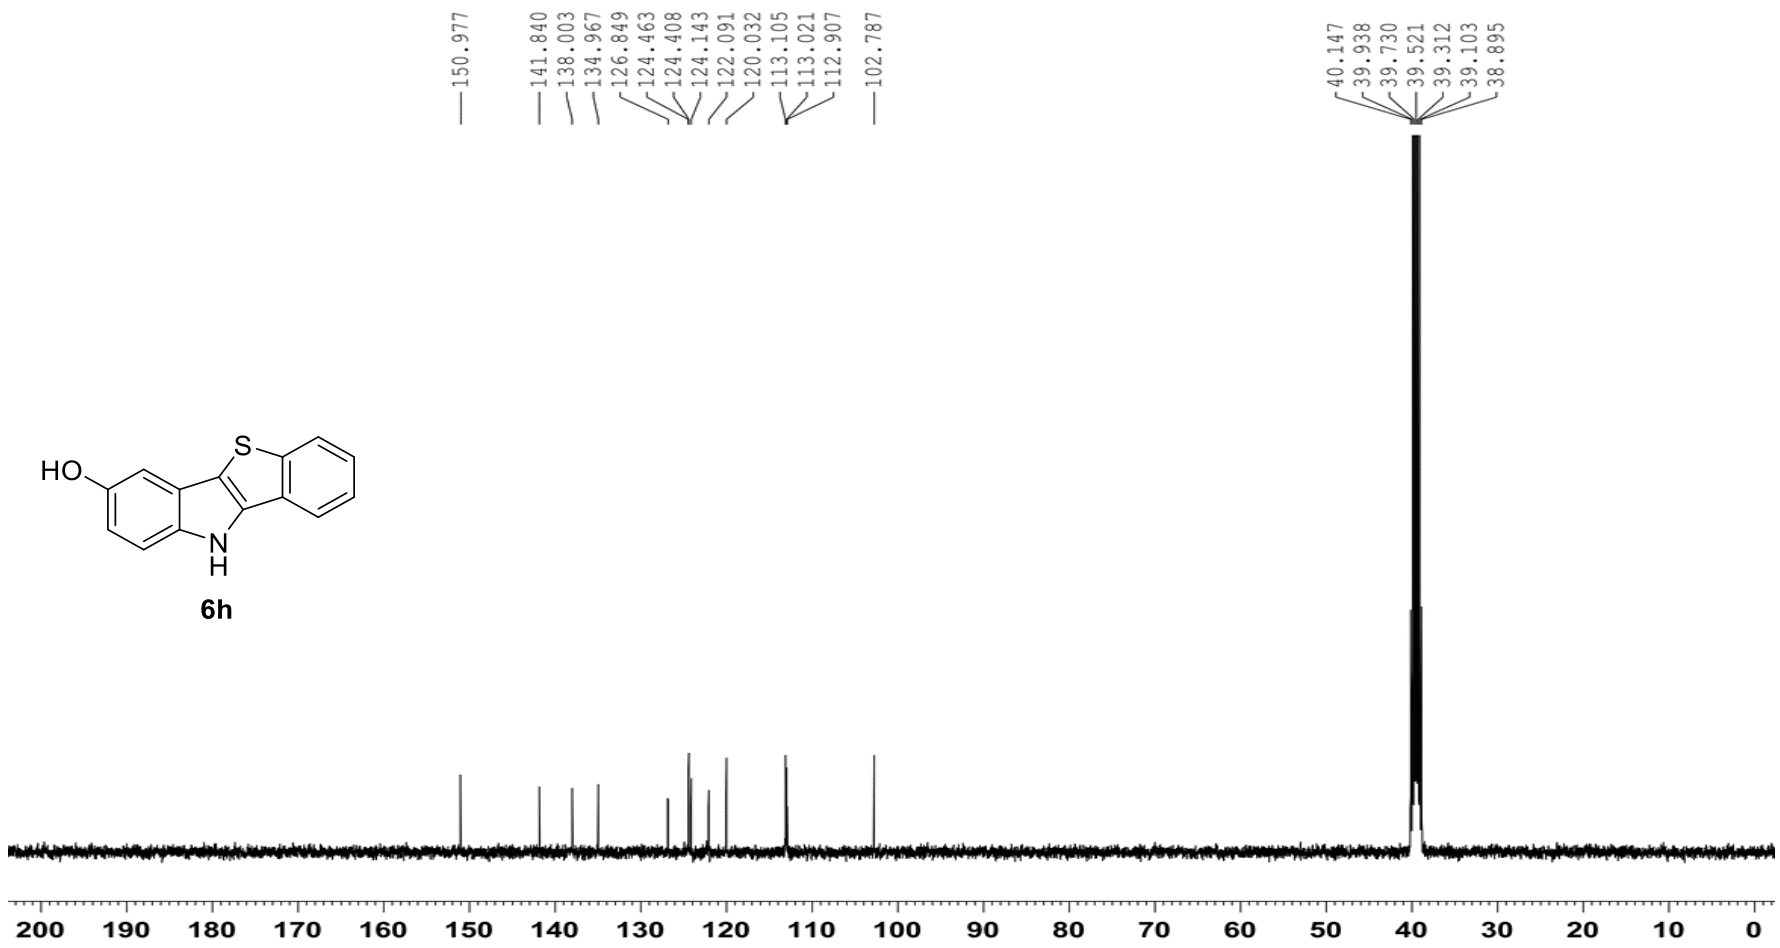

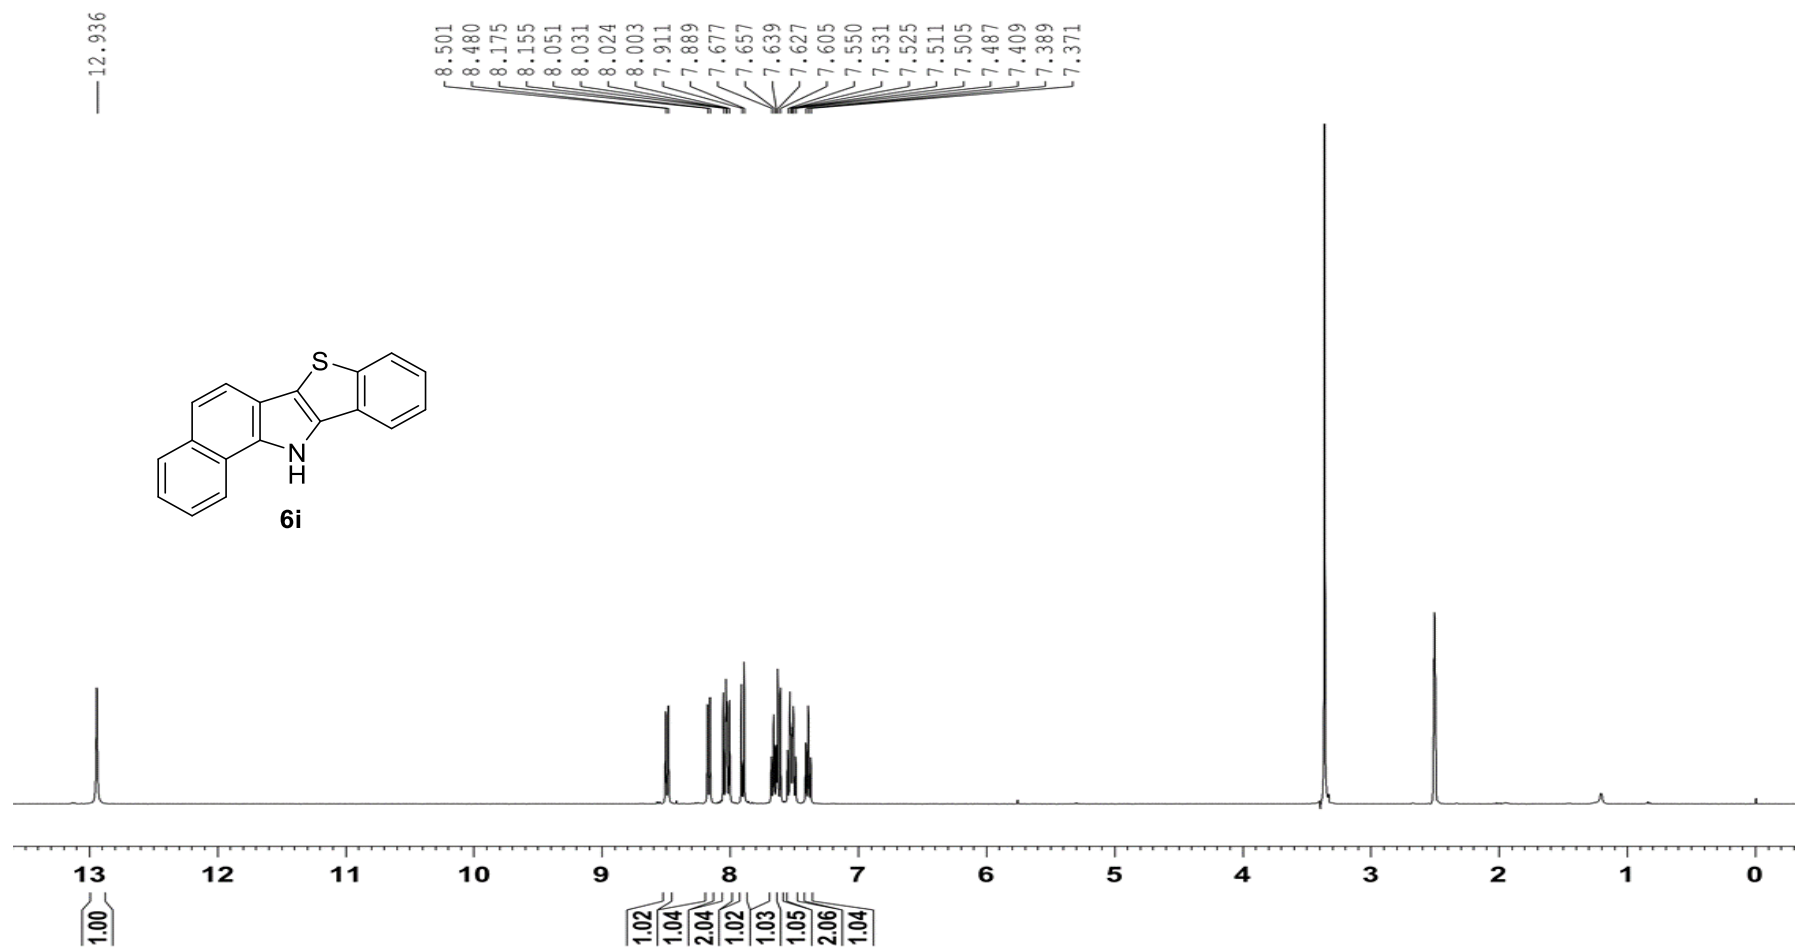

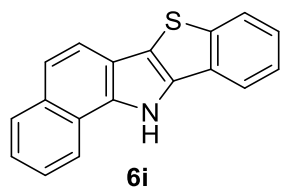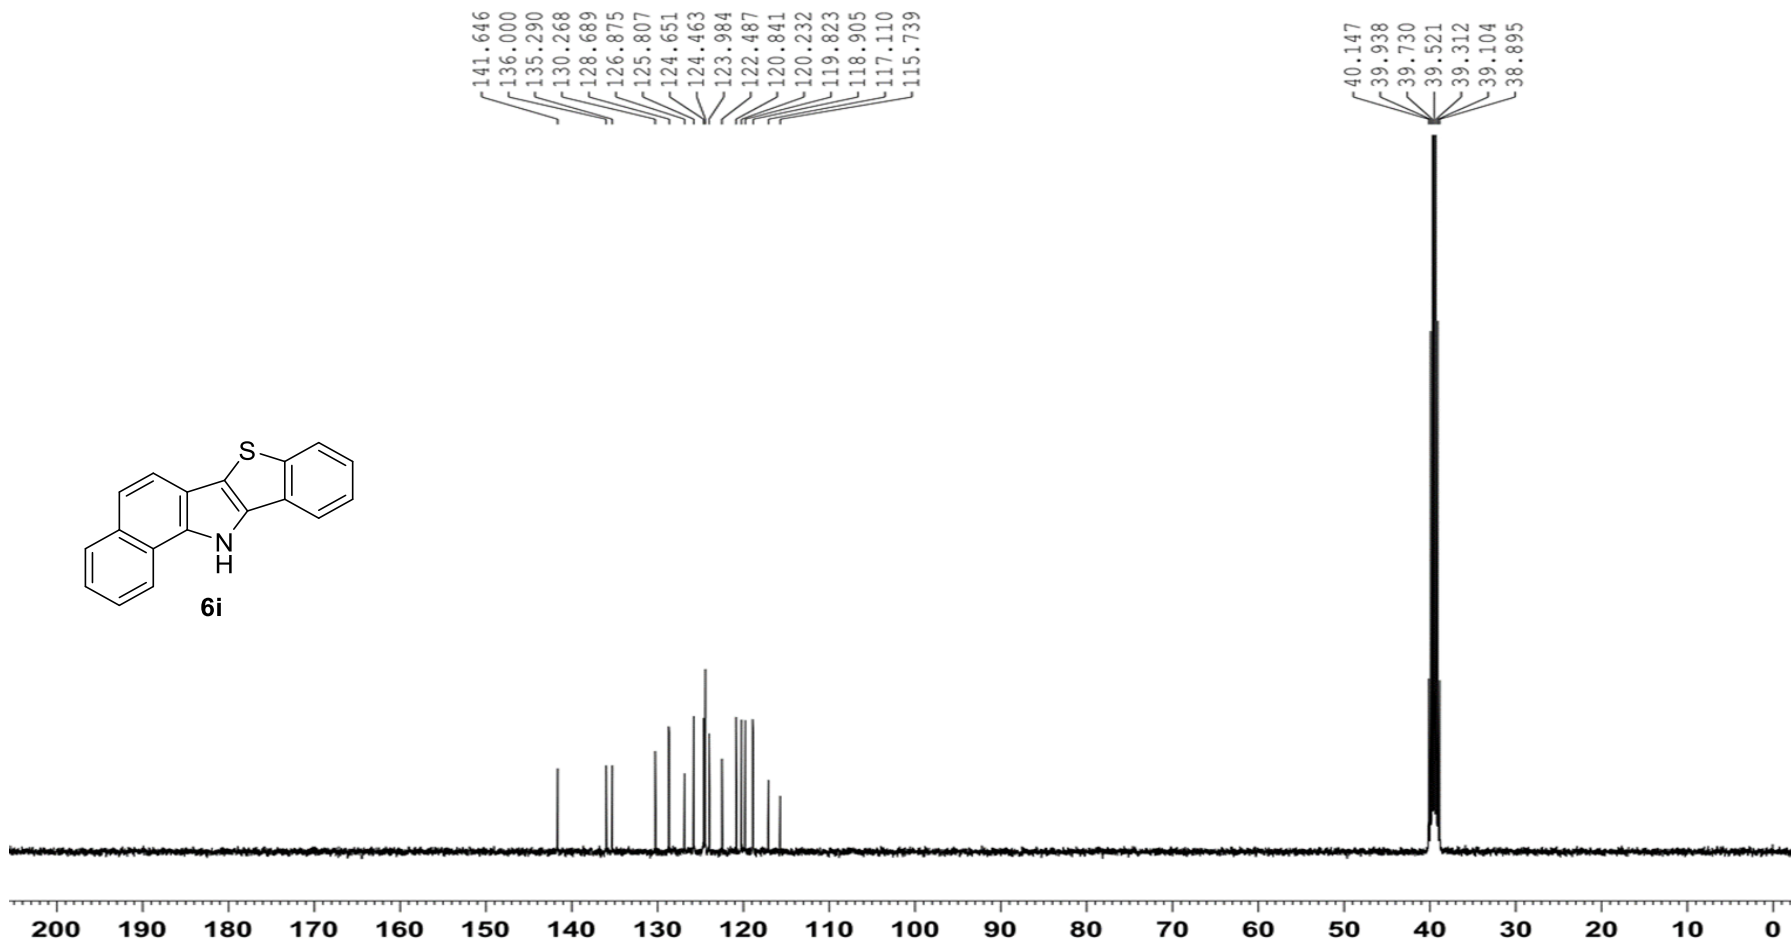

—12.327

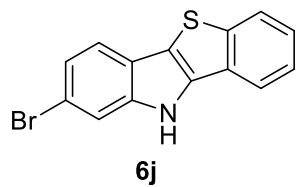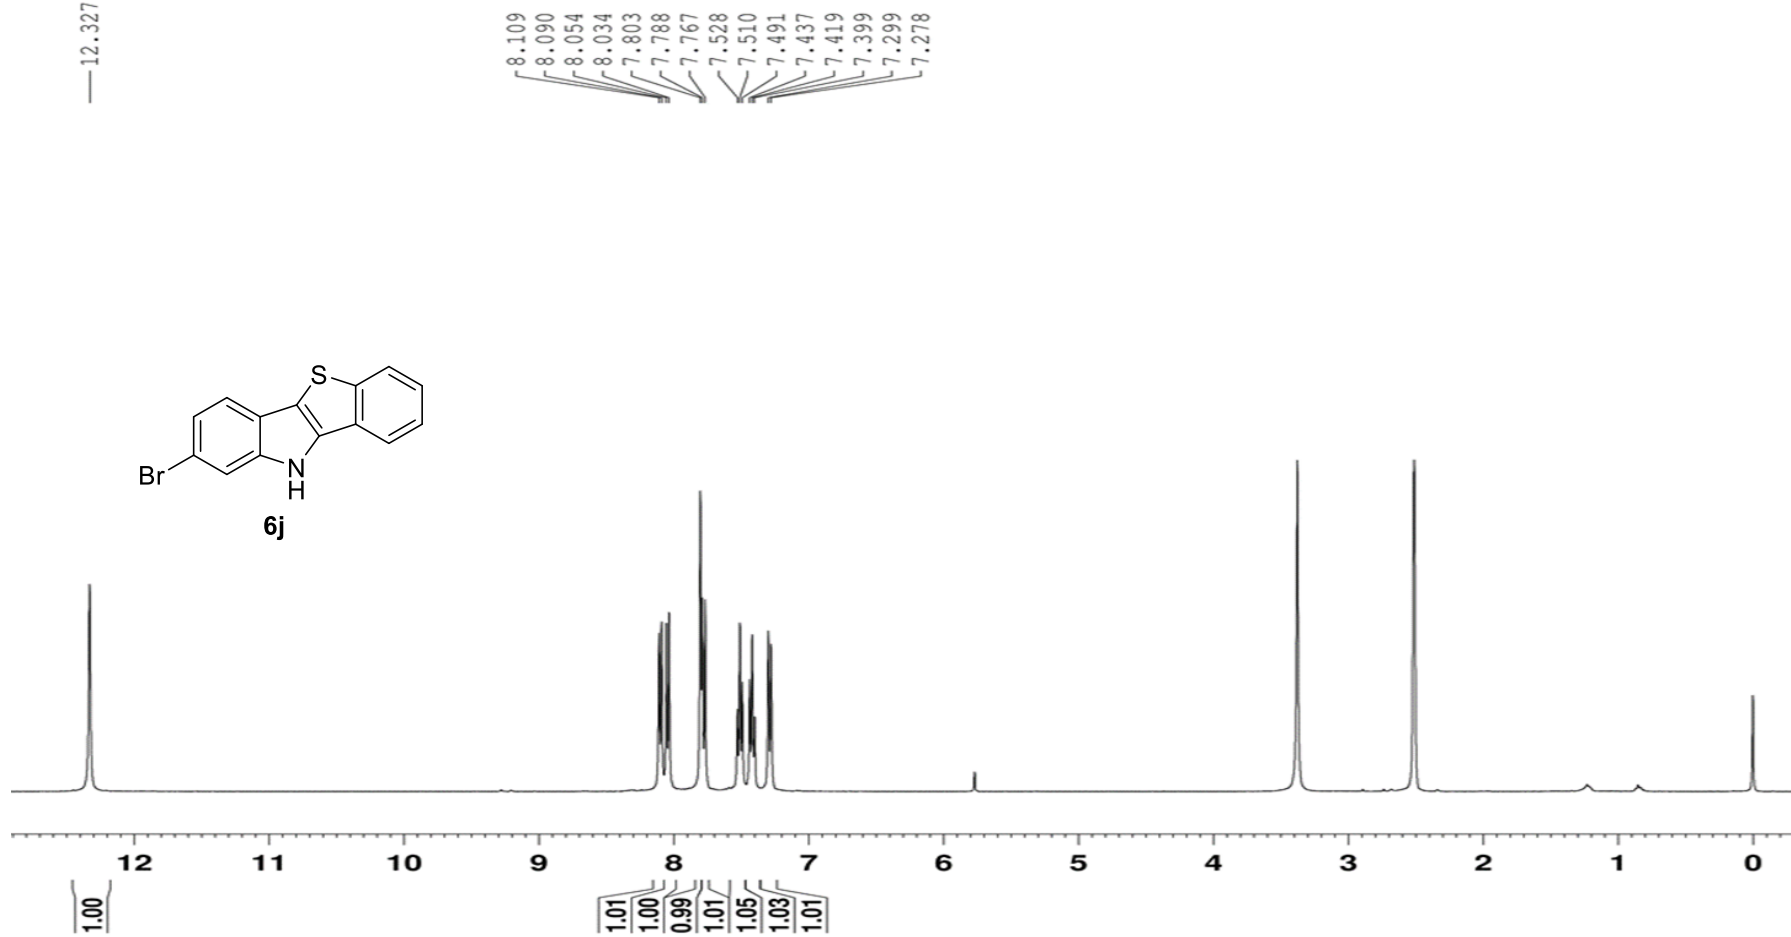

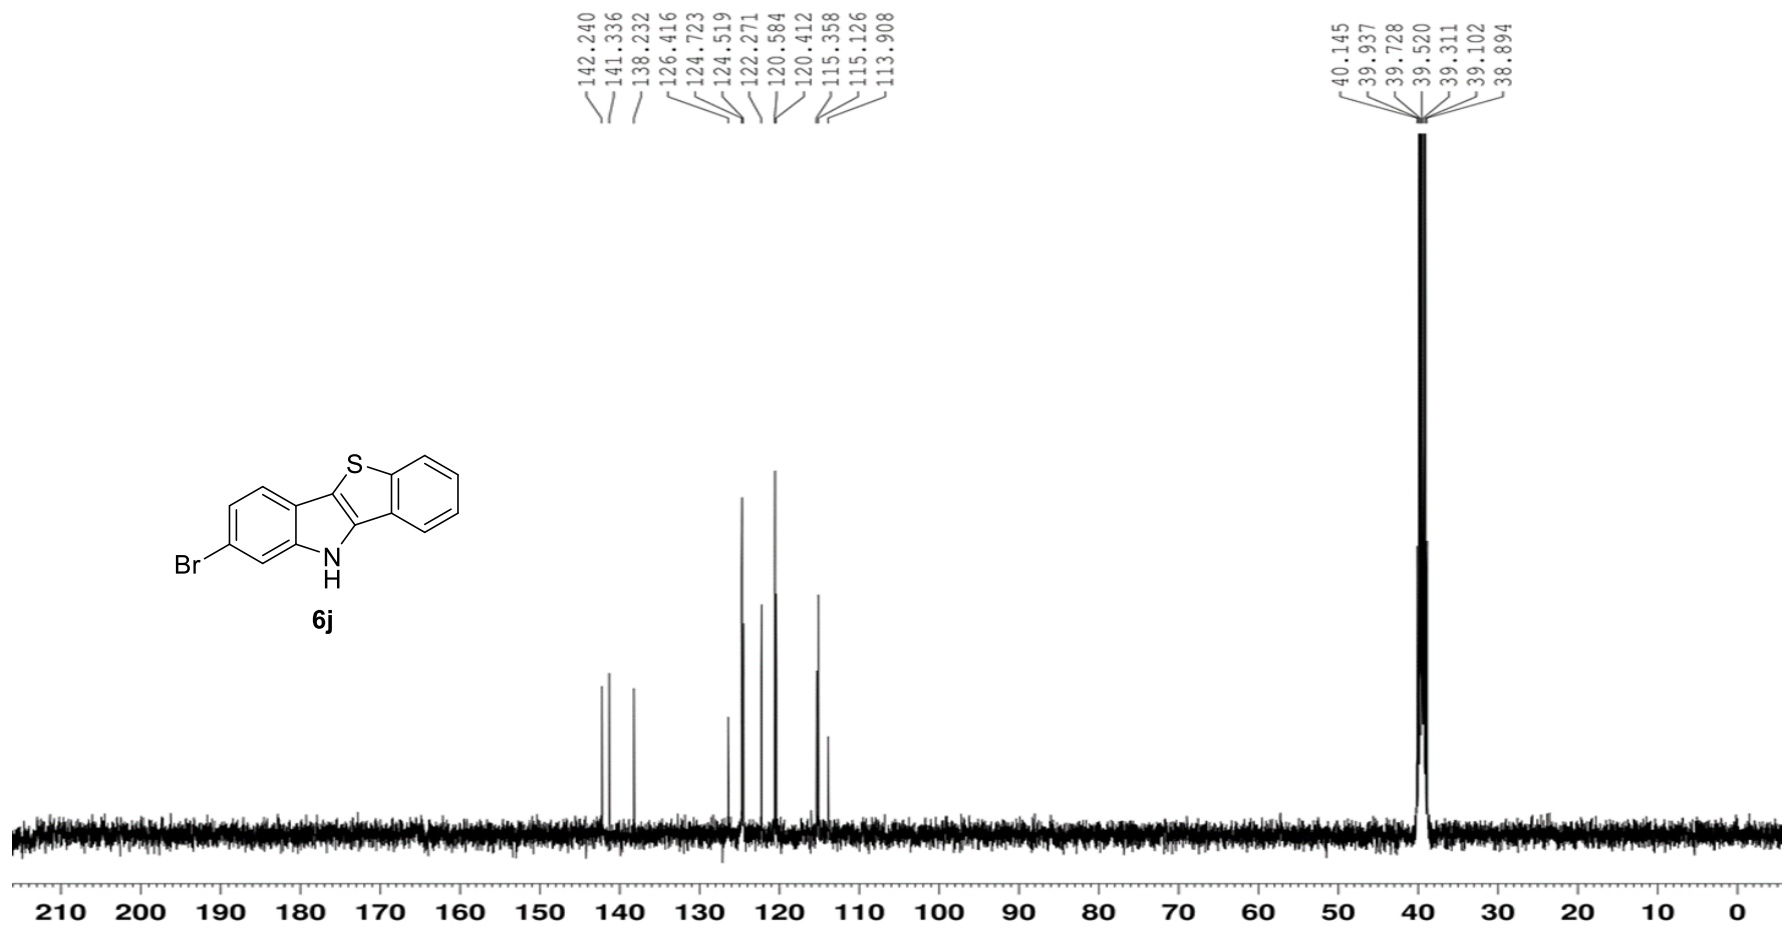

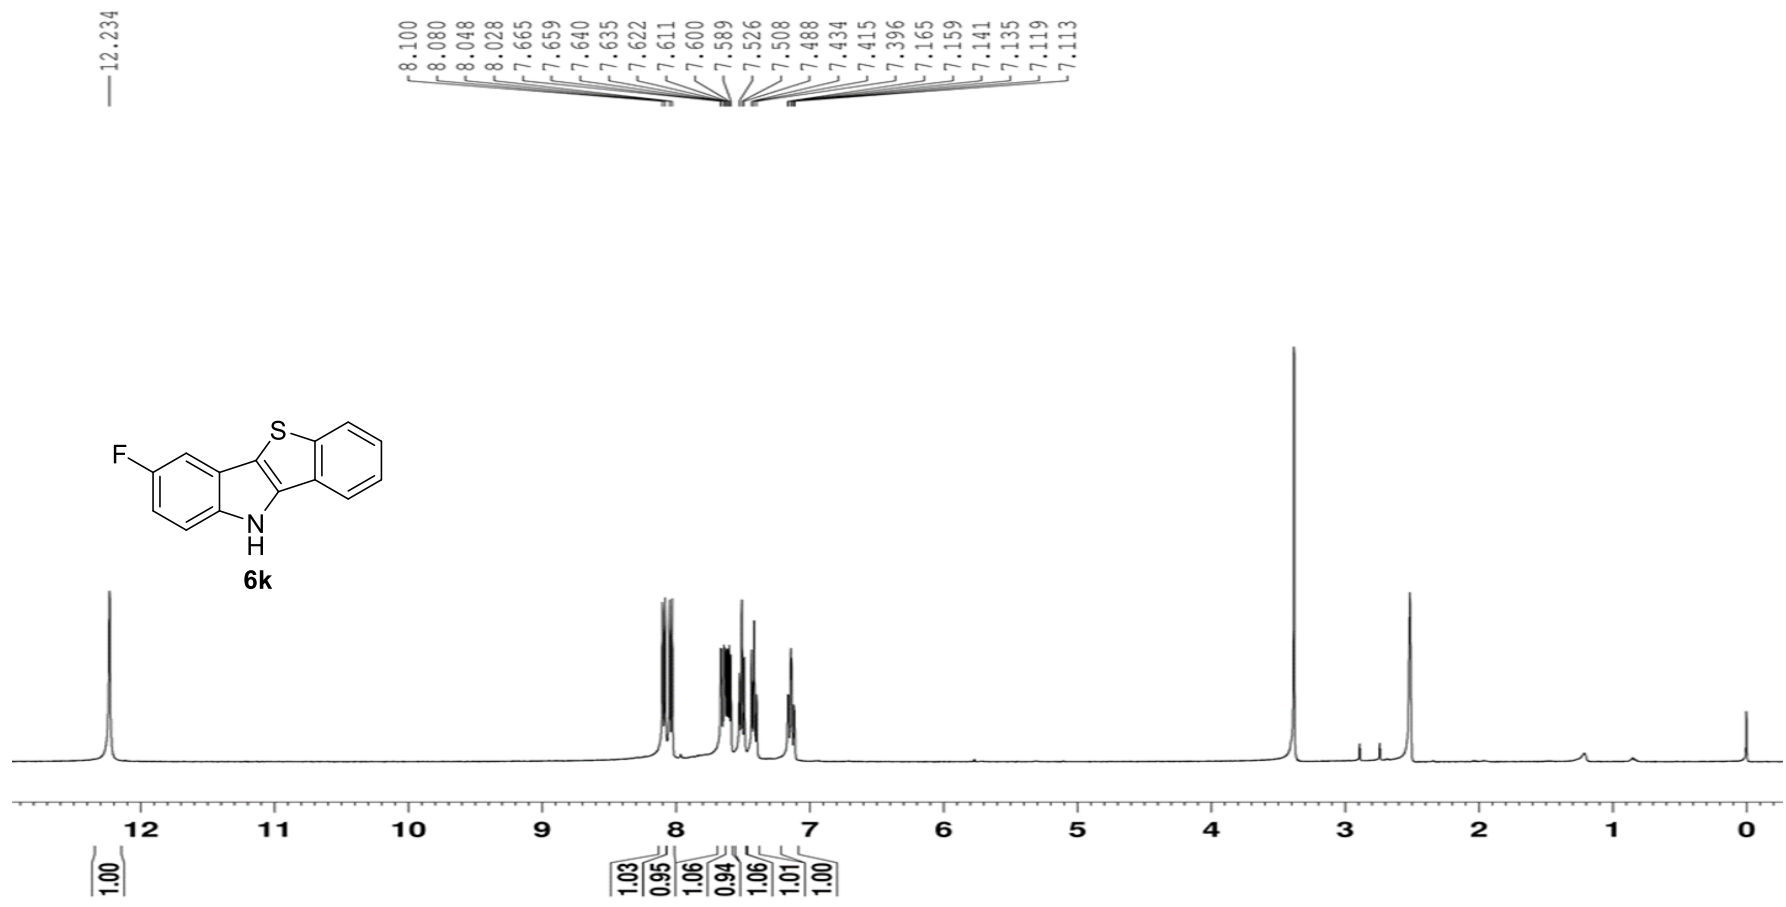



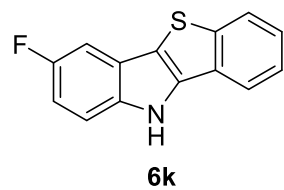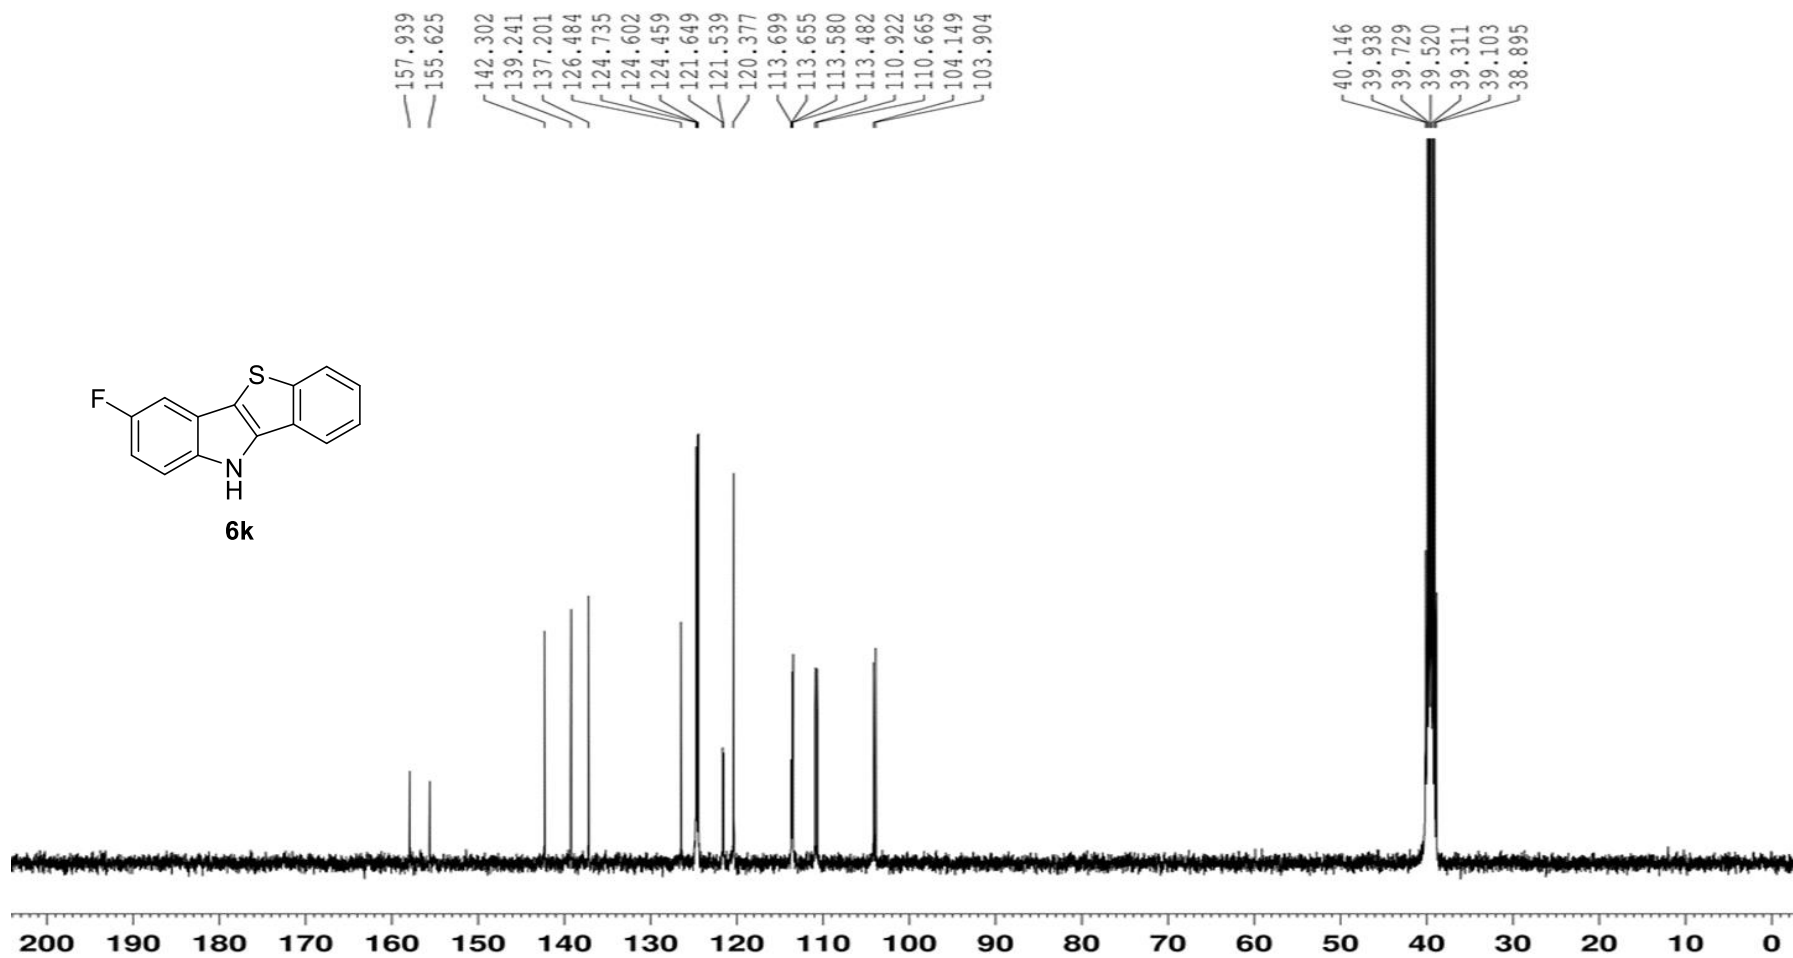

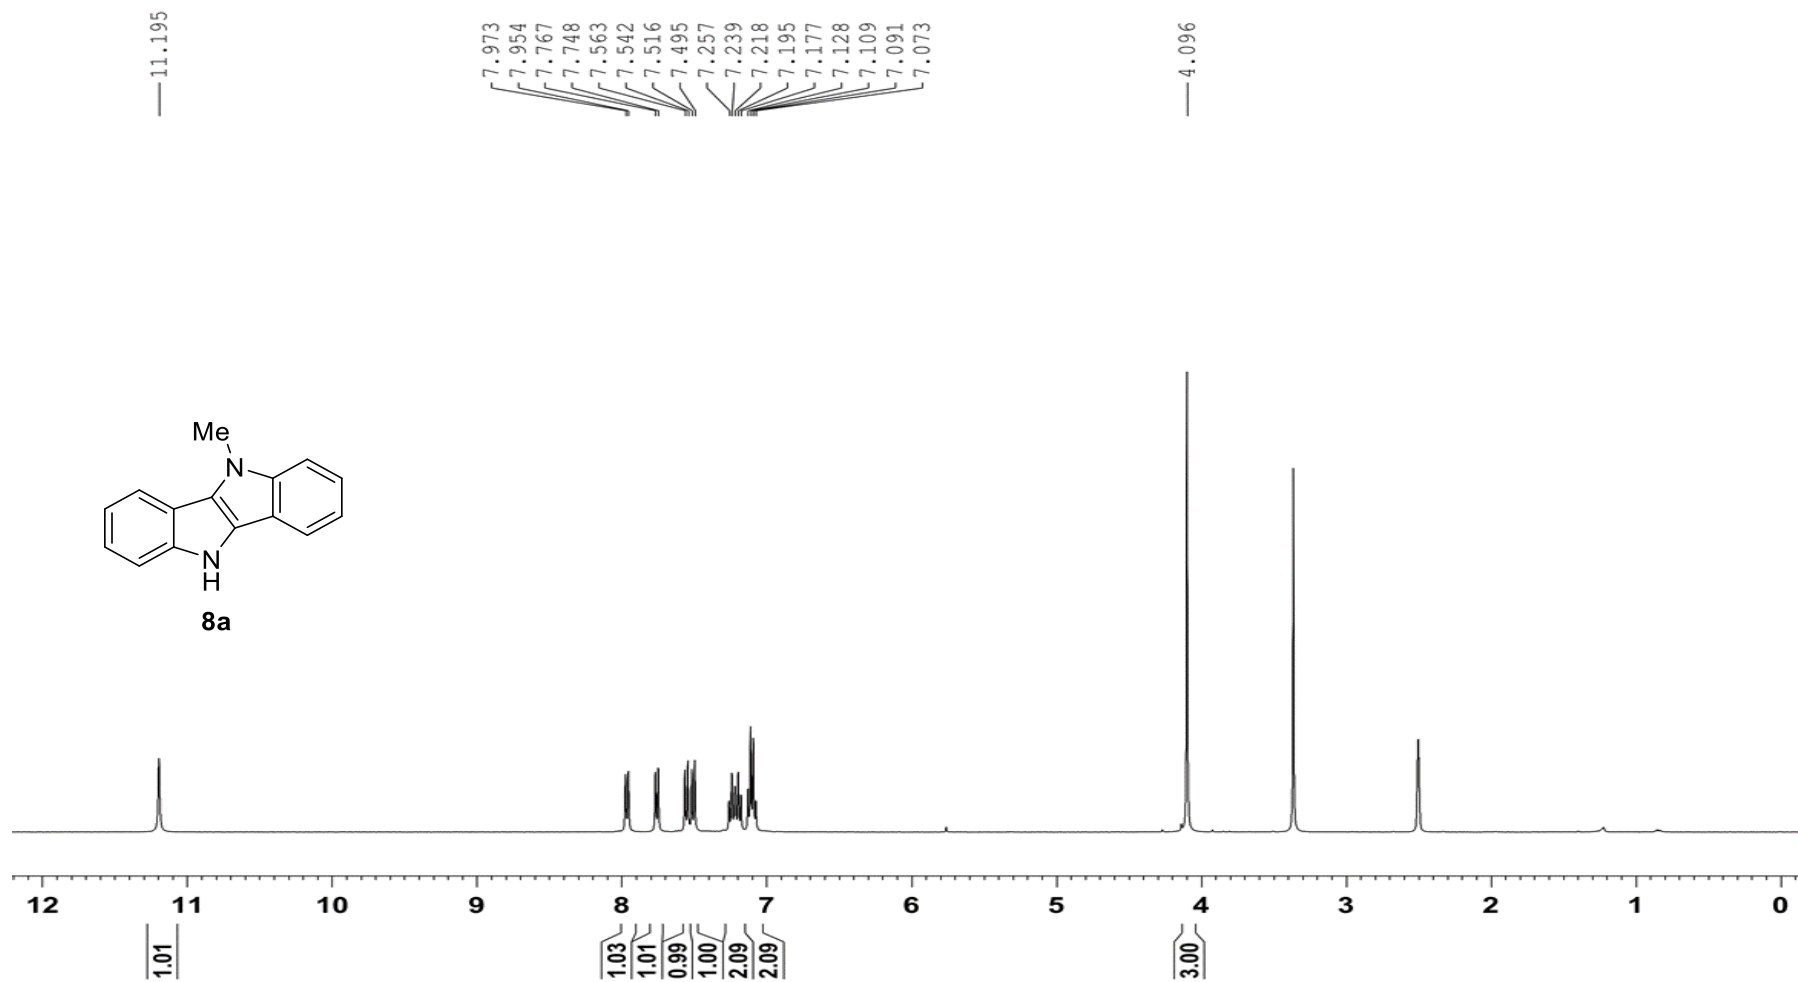

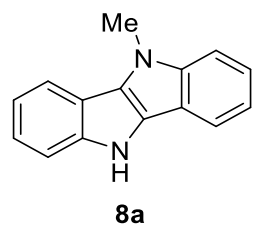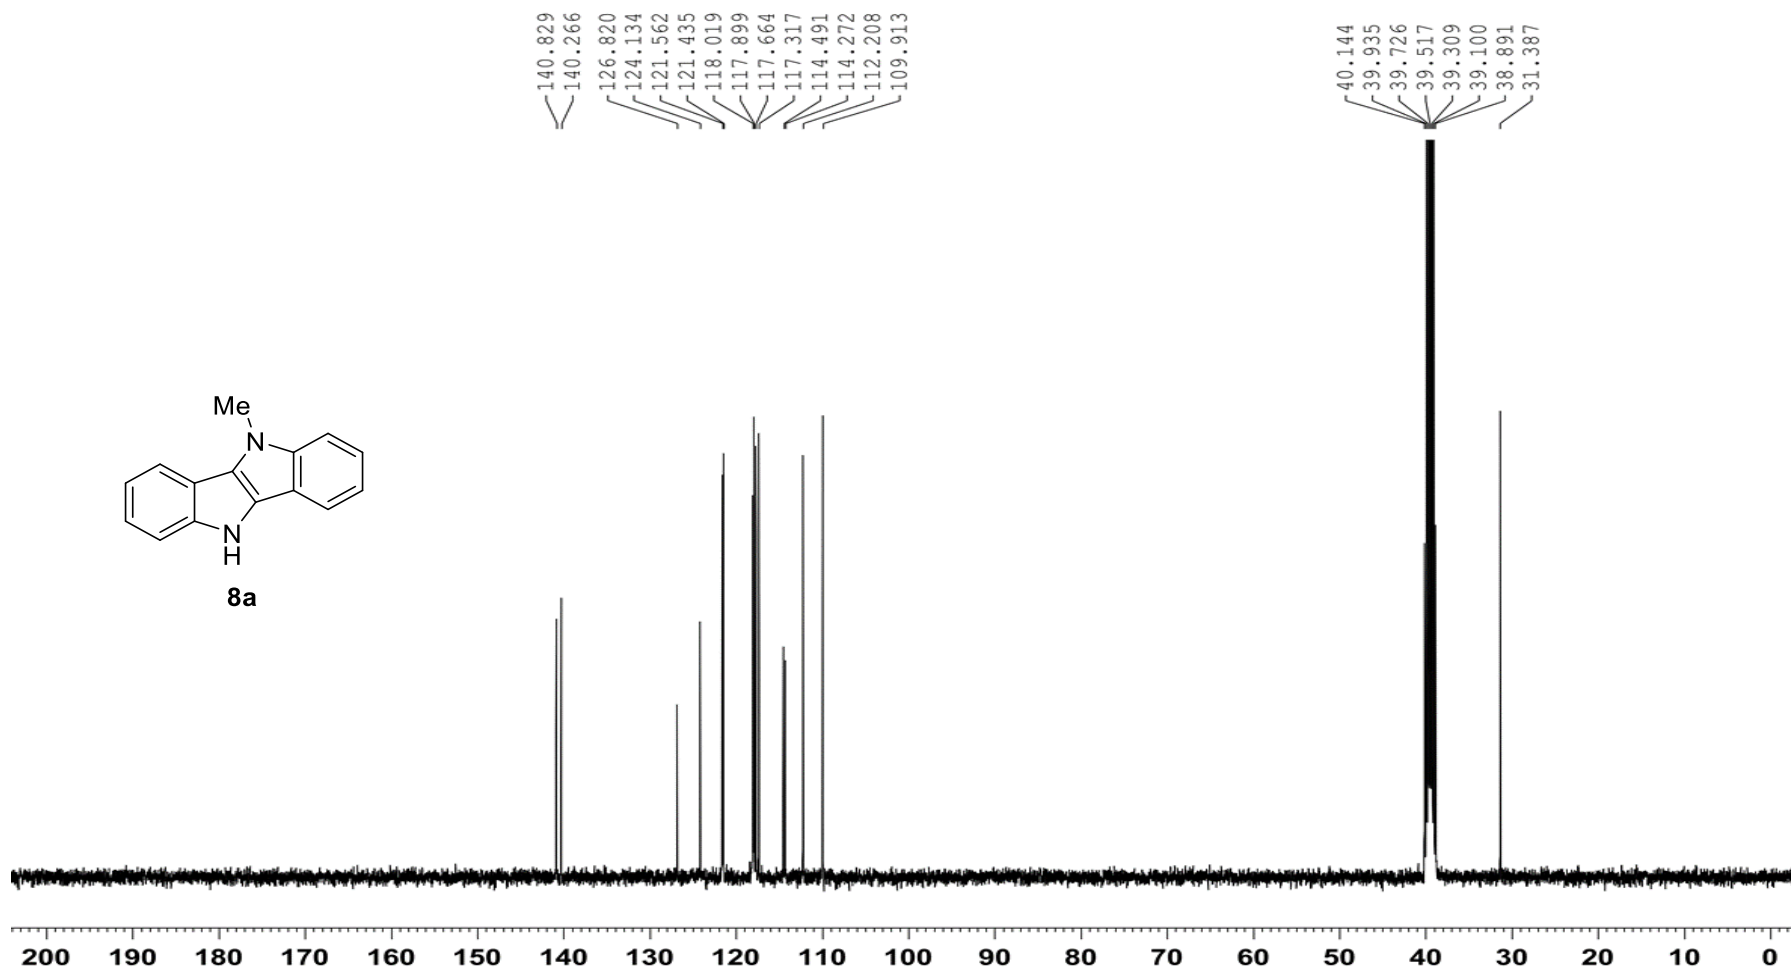

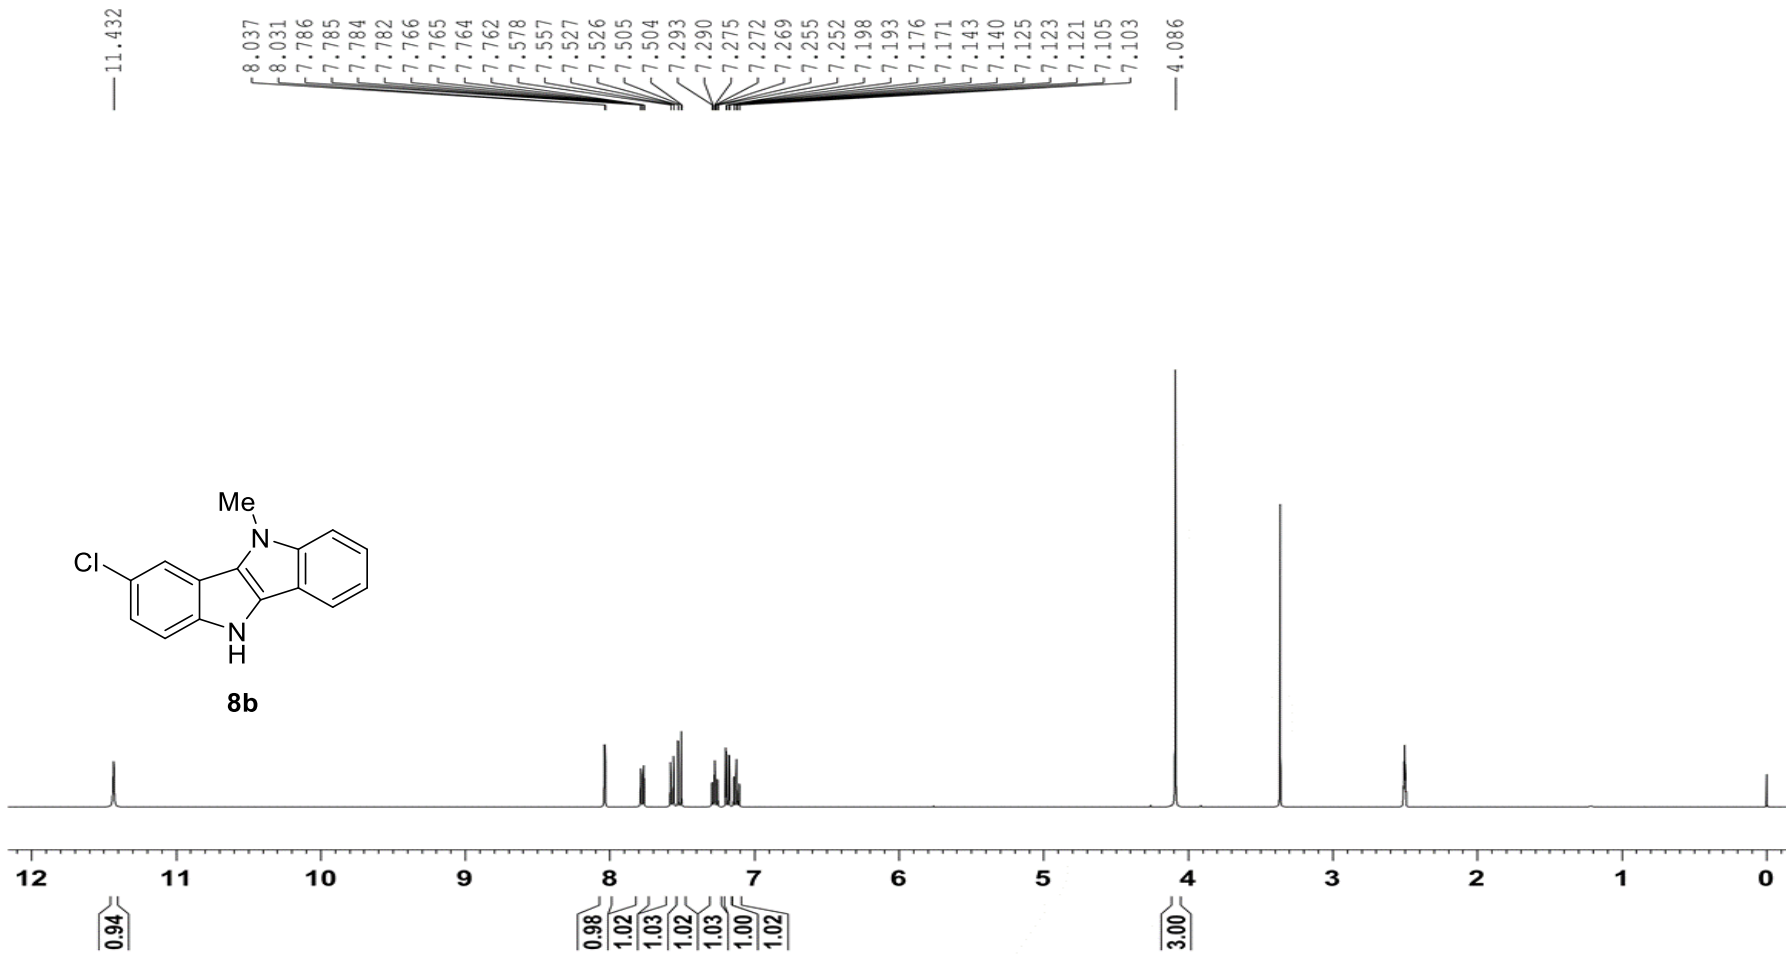

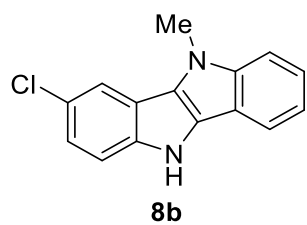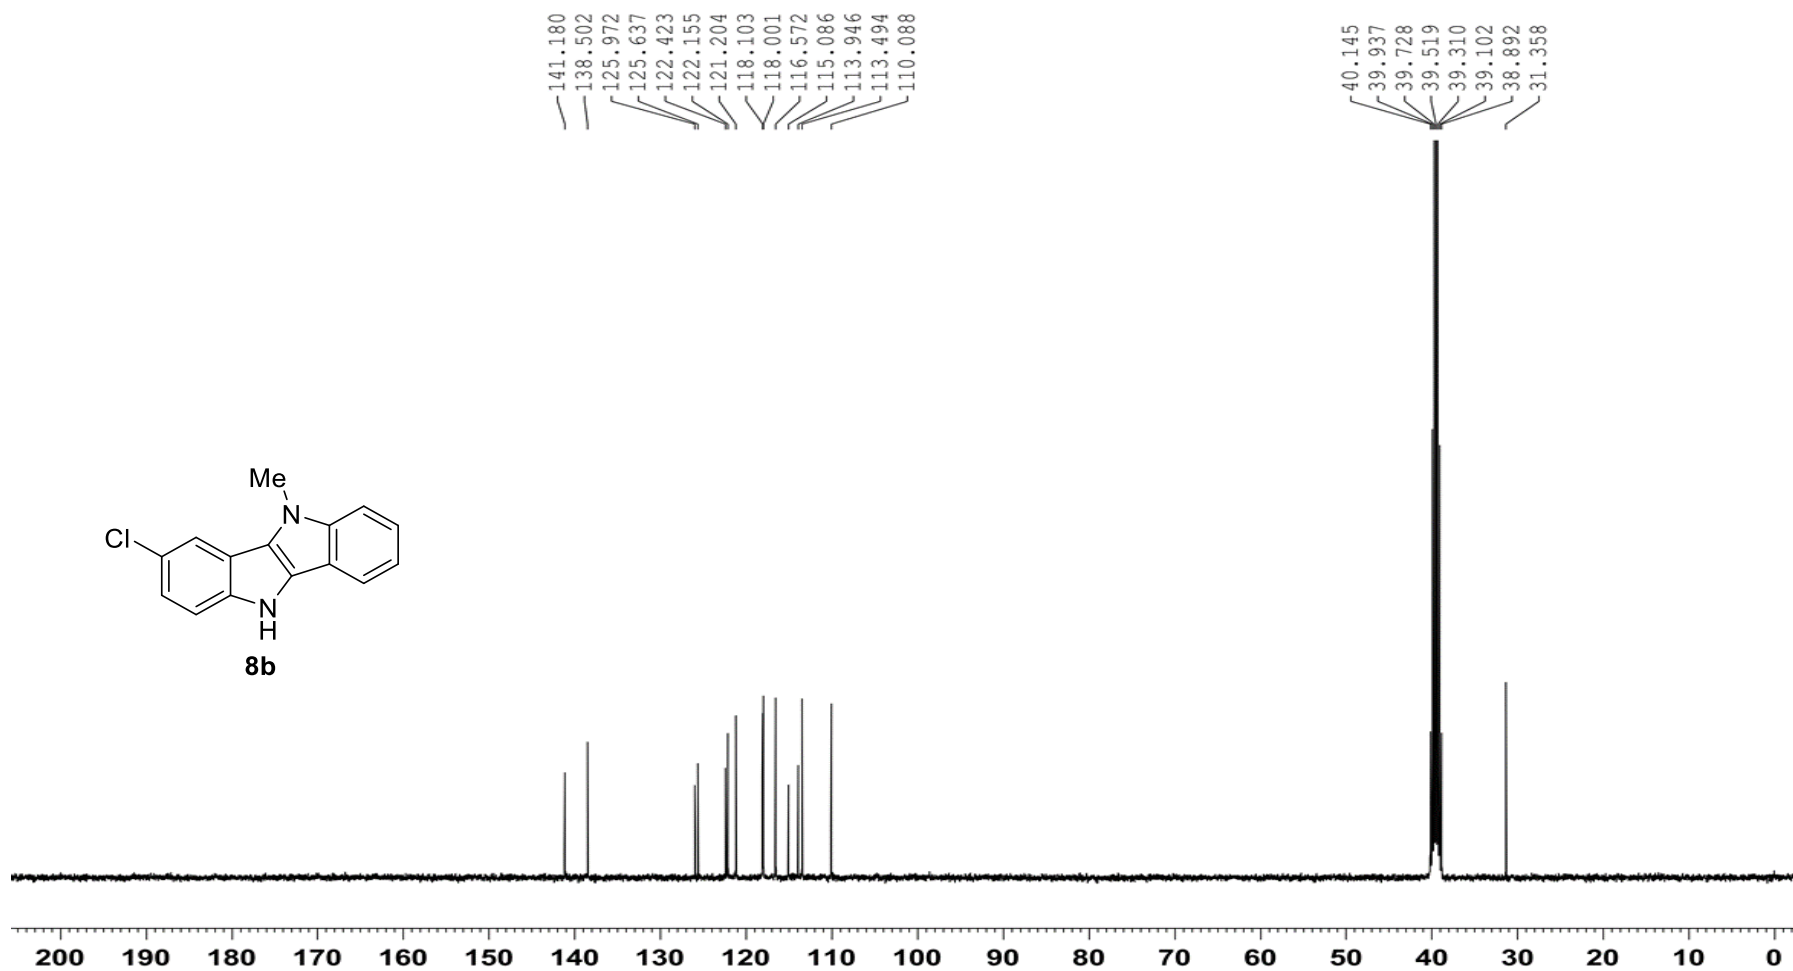

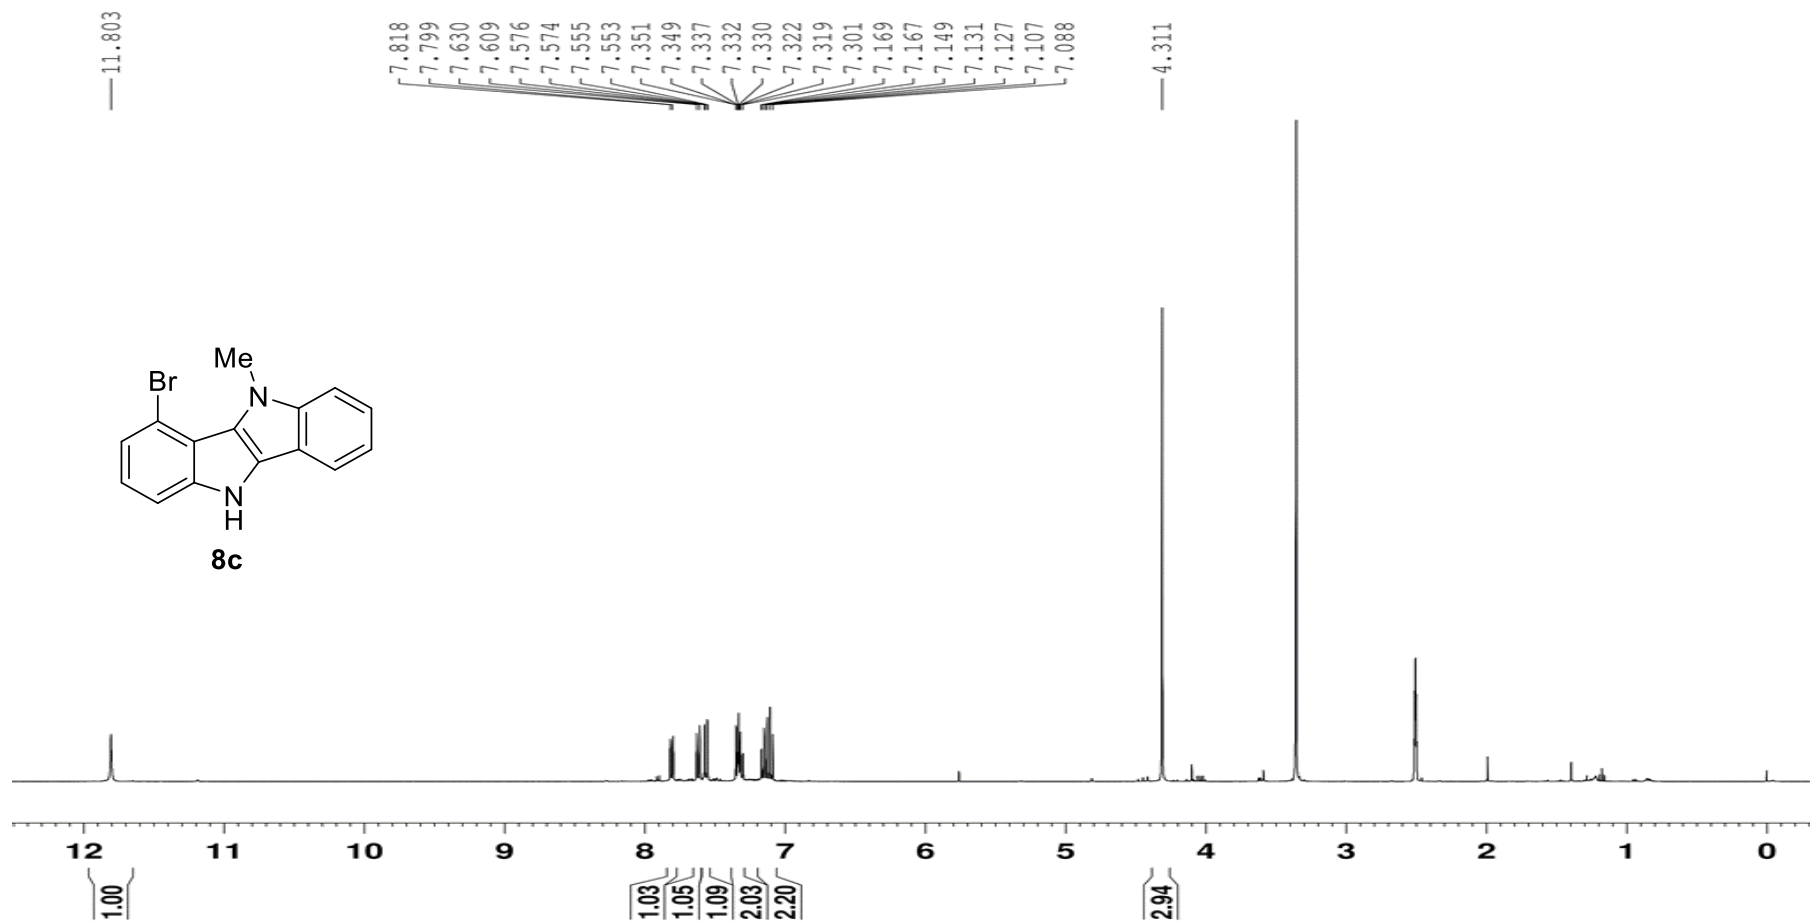

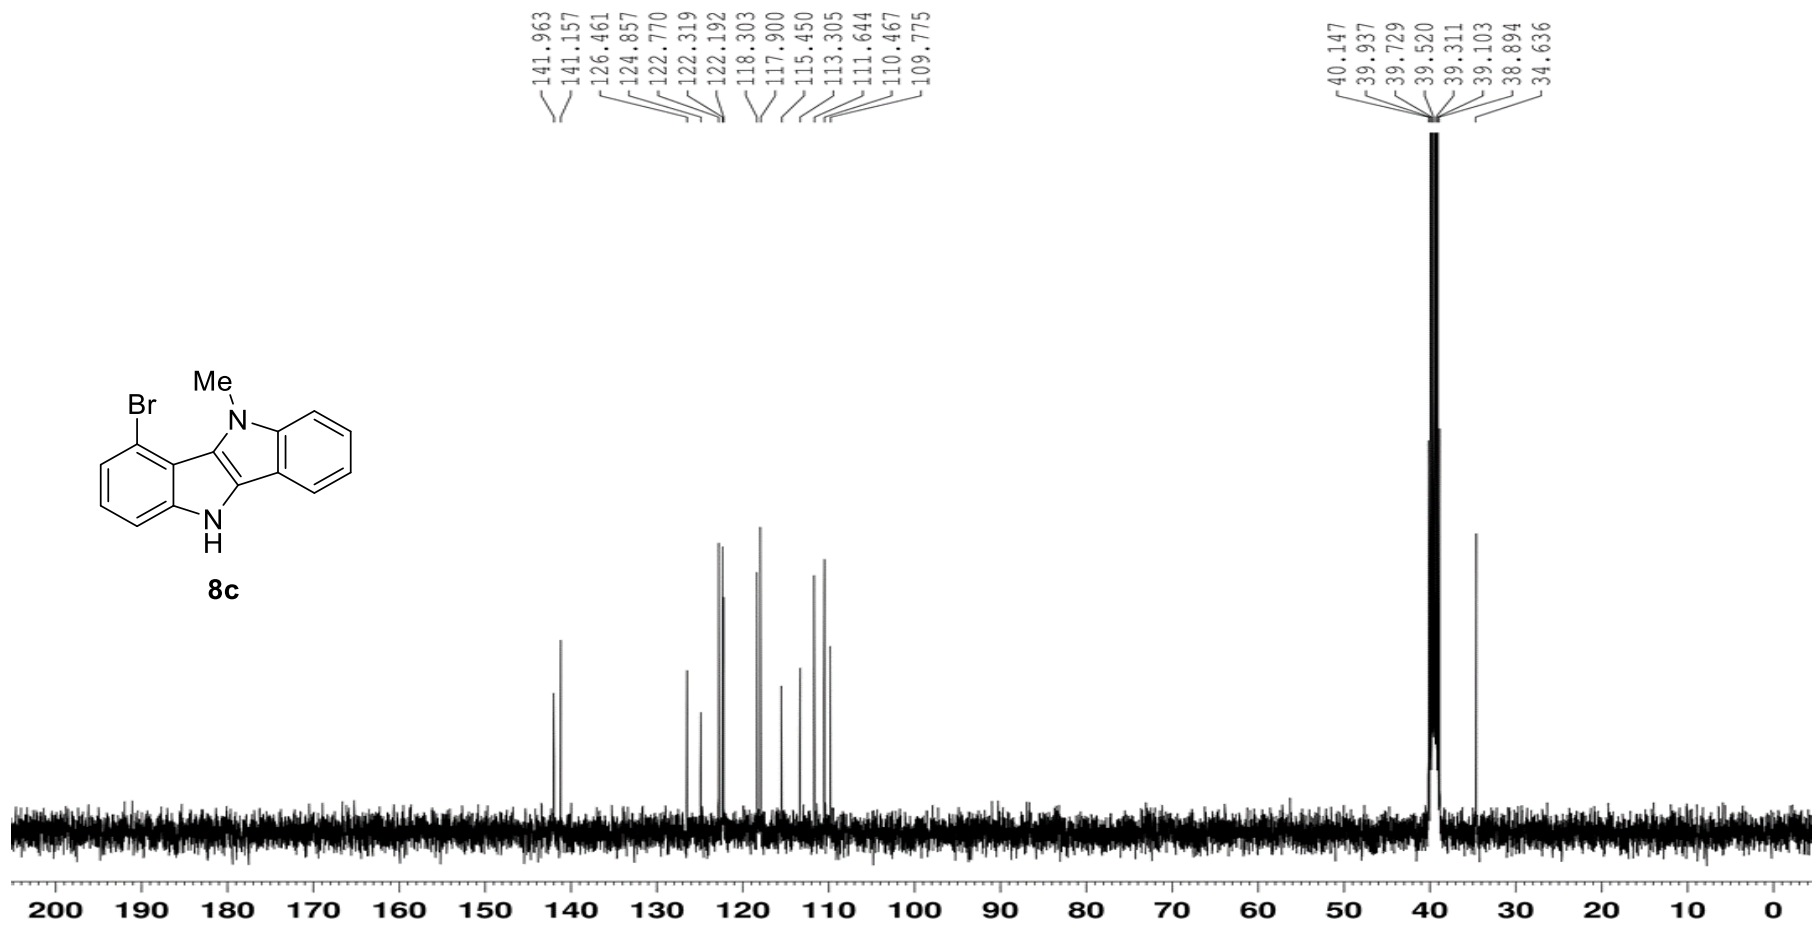

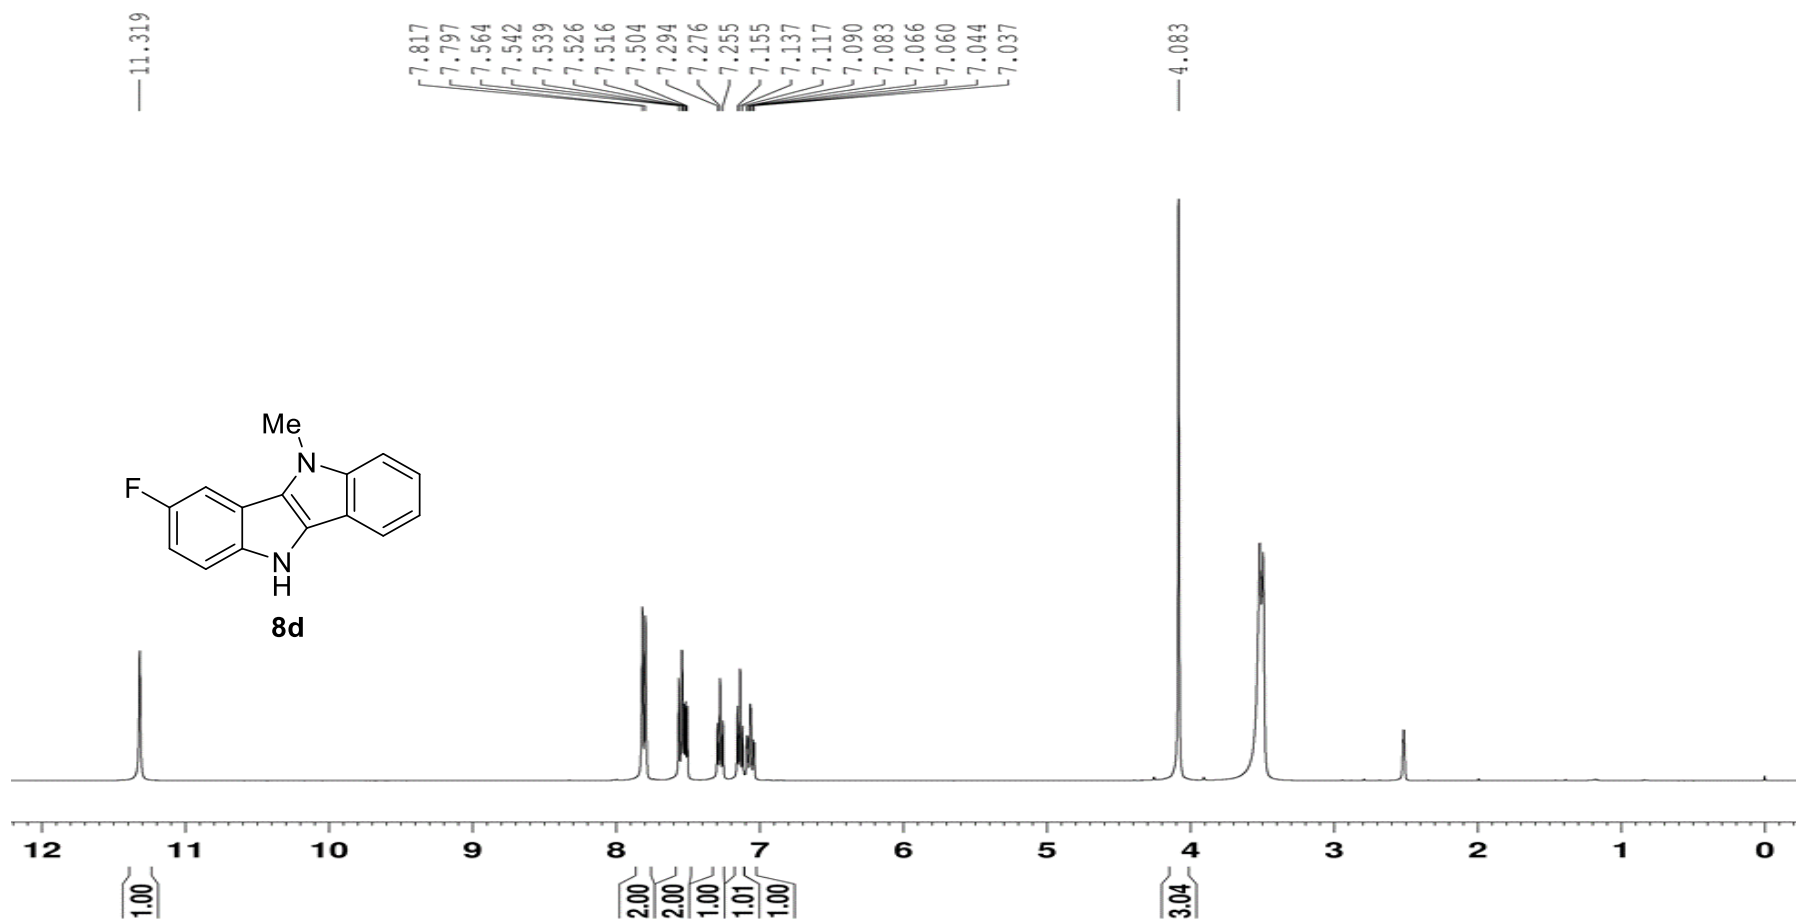



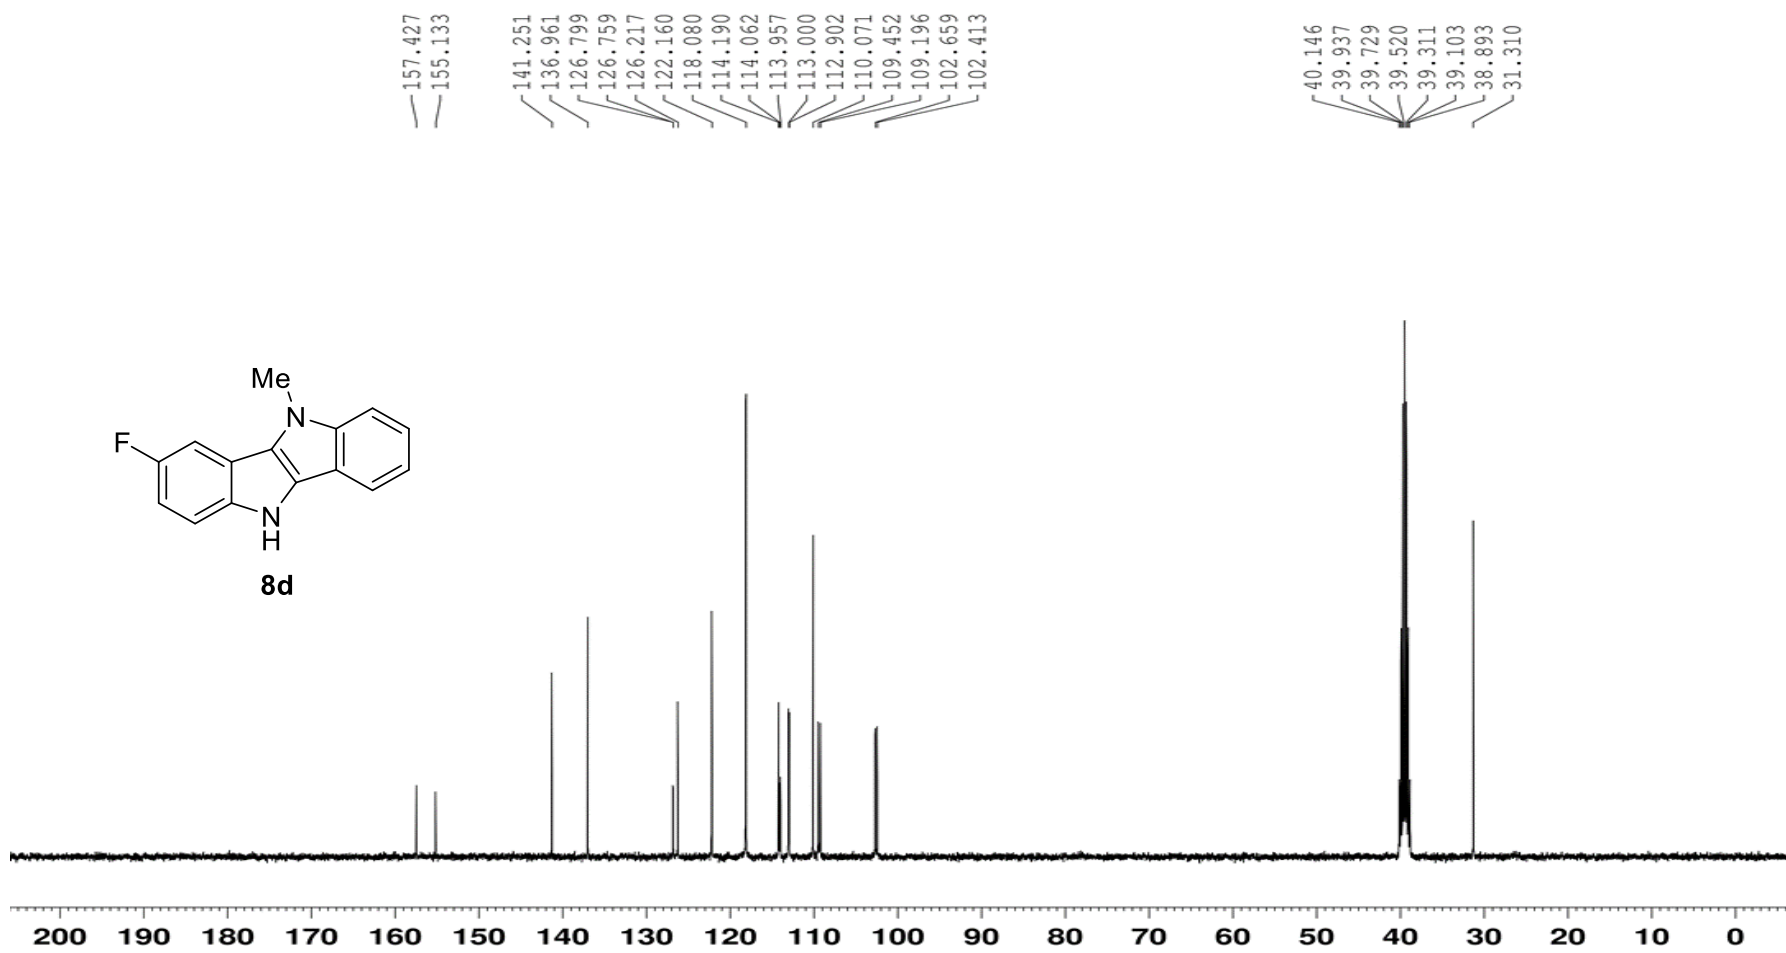

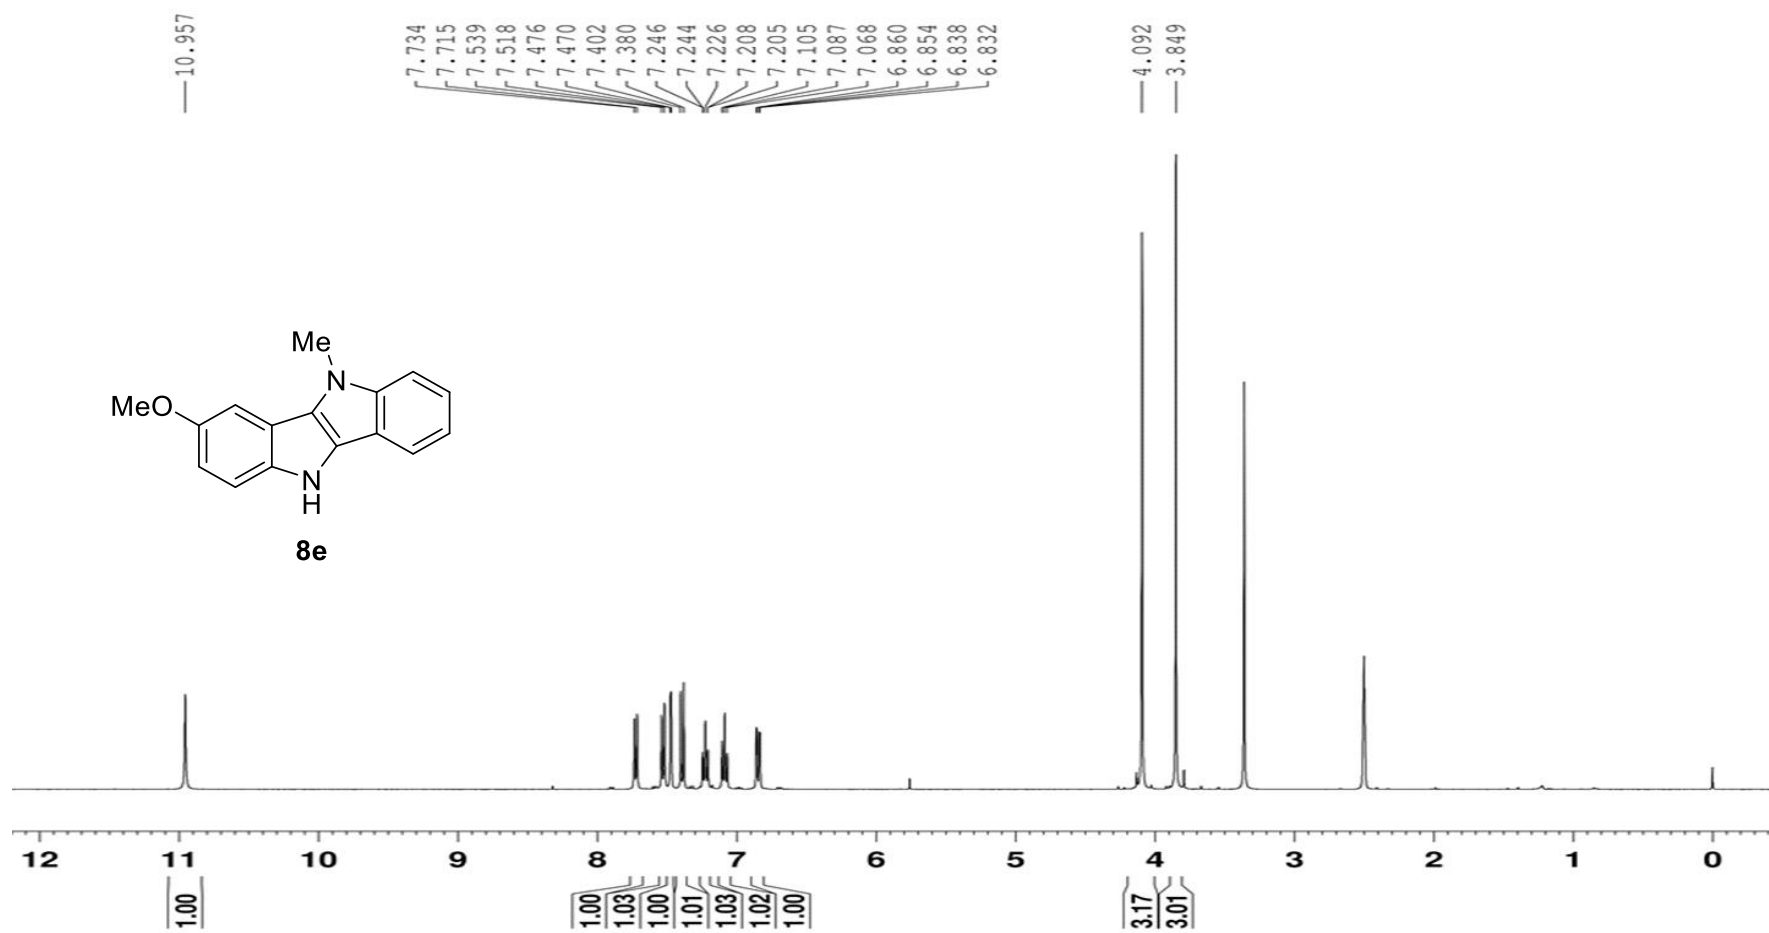

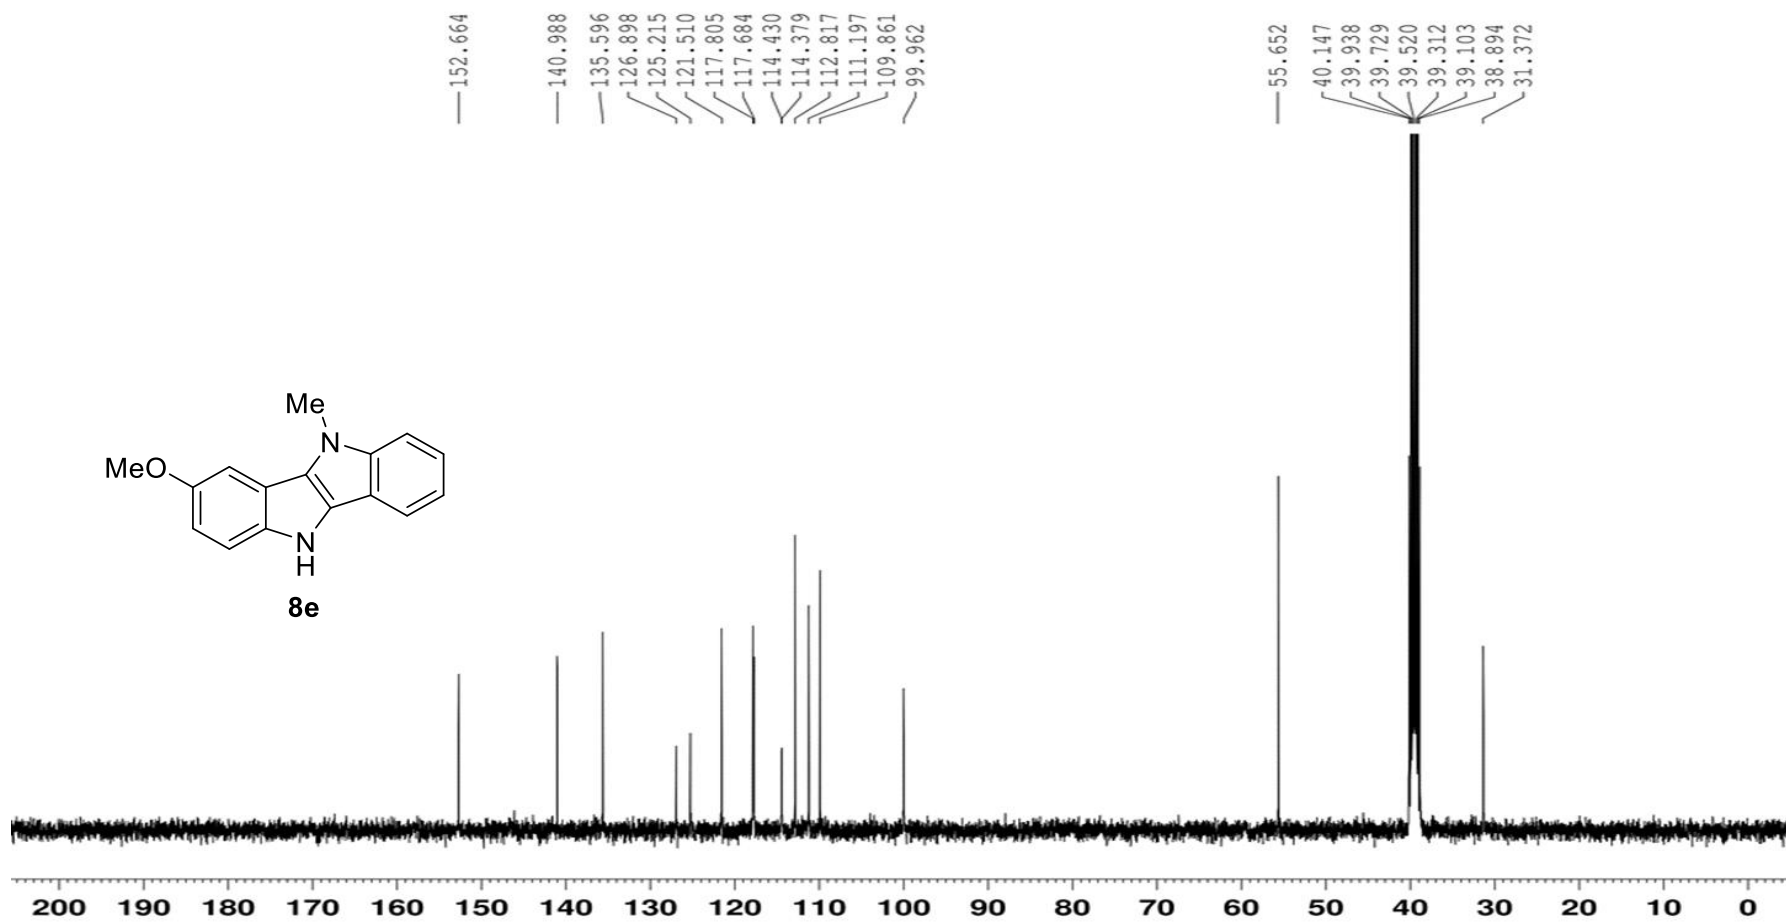

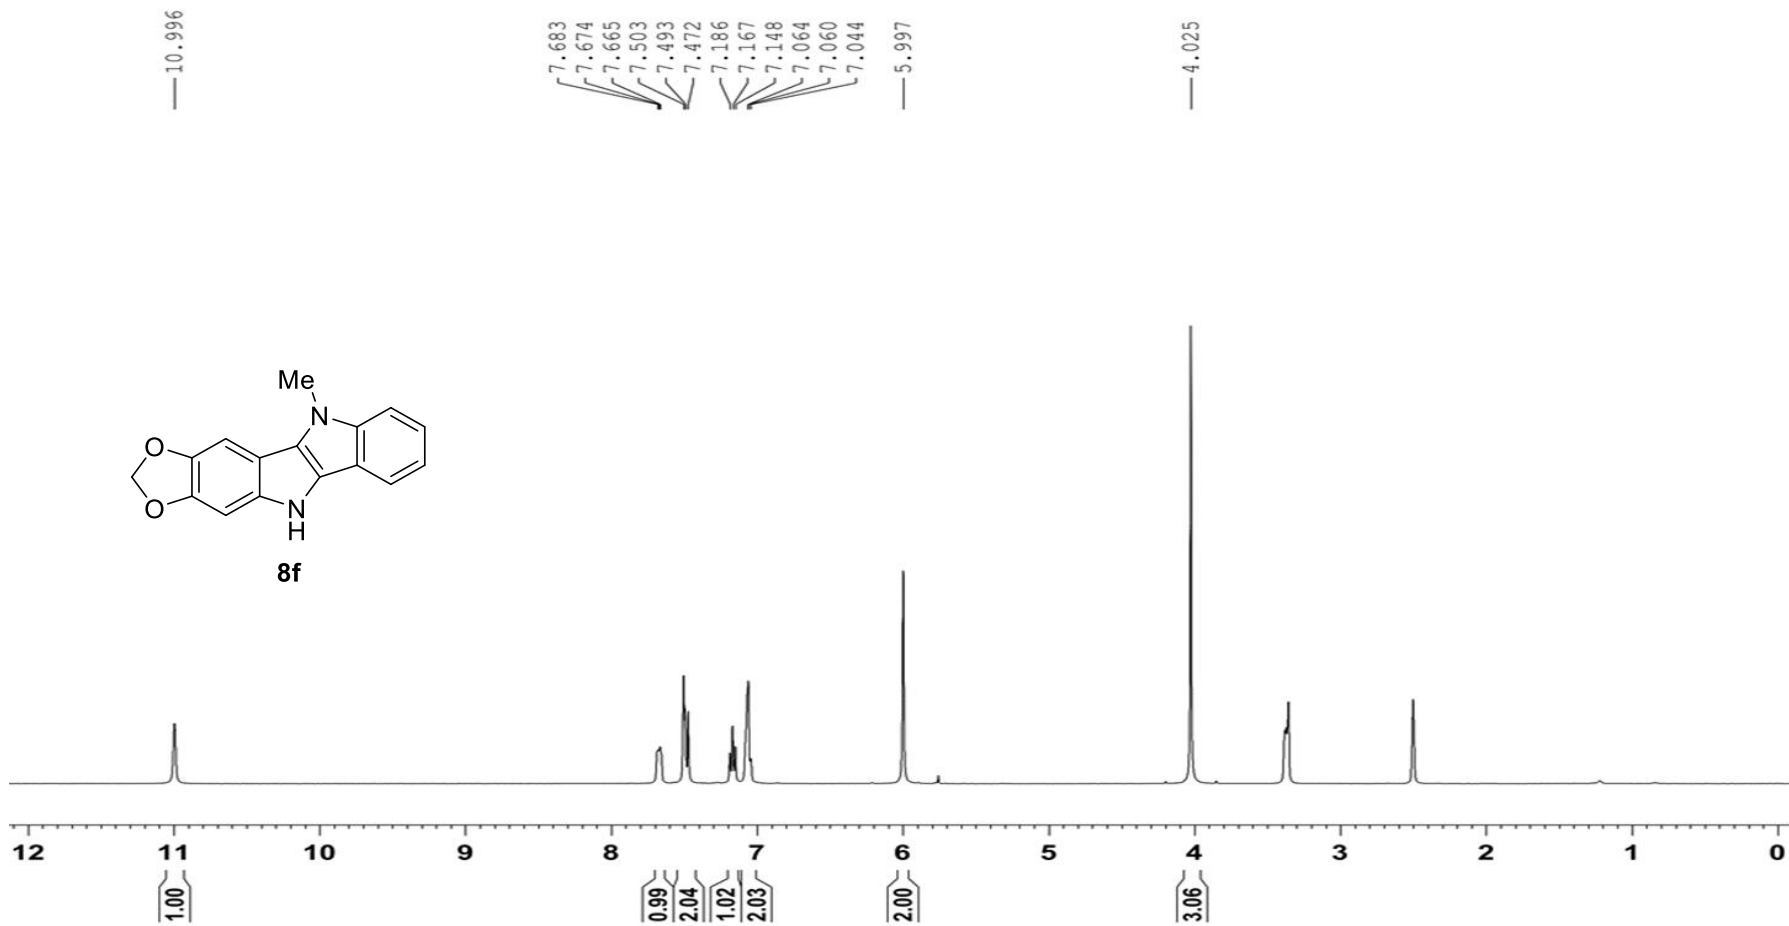

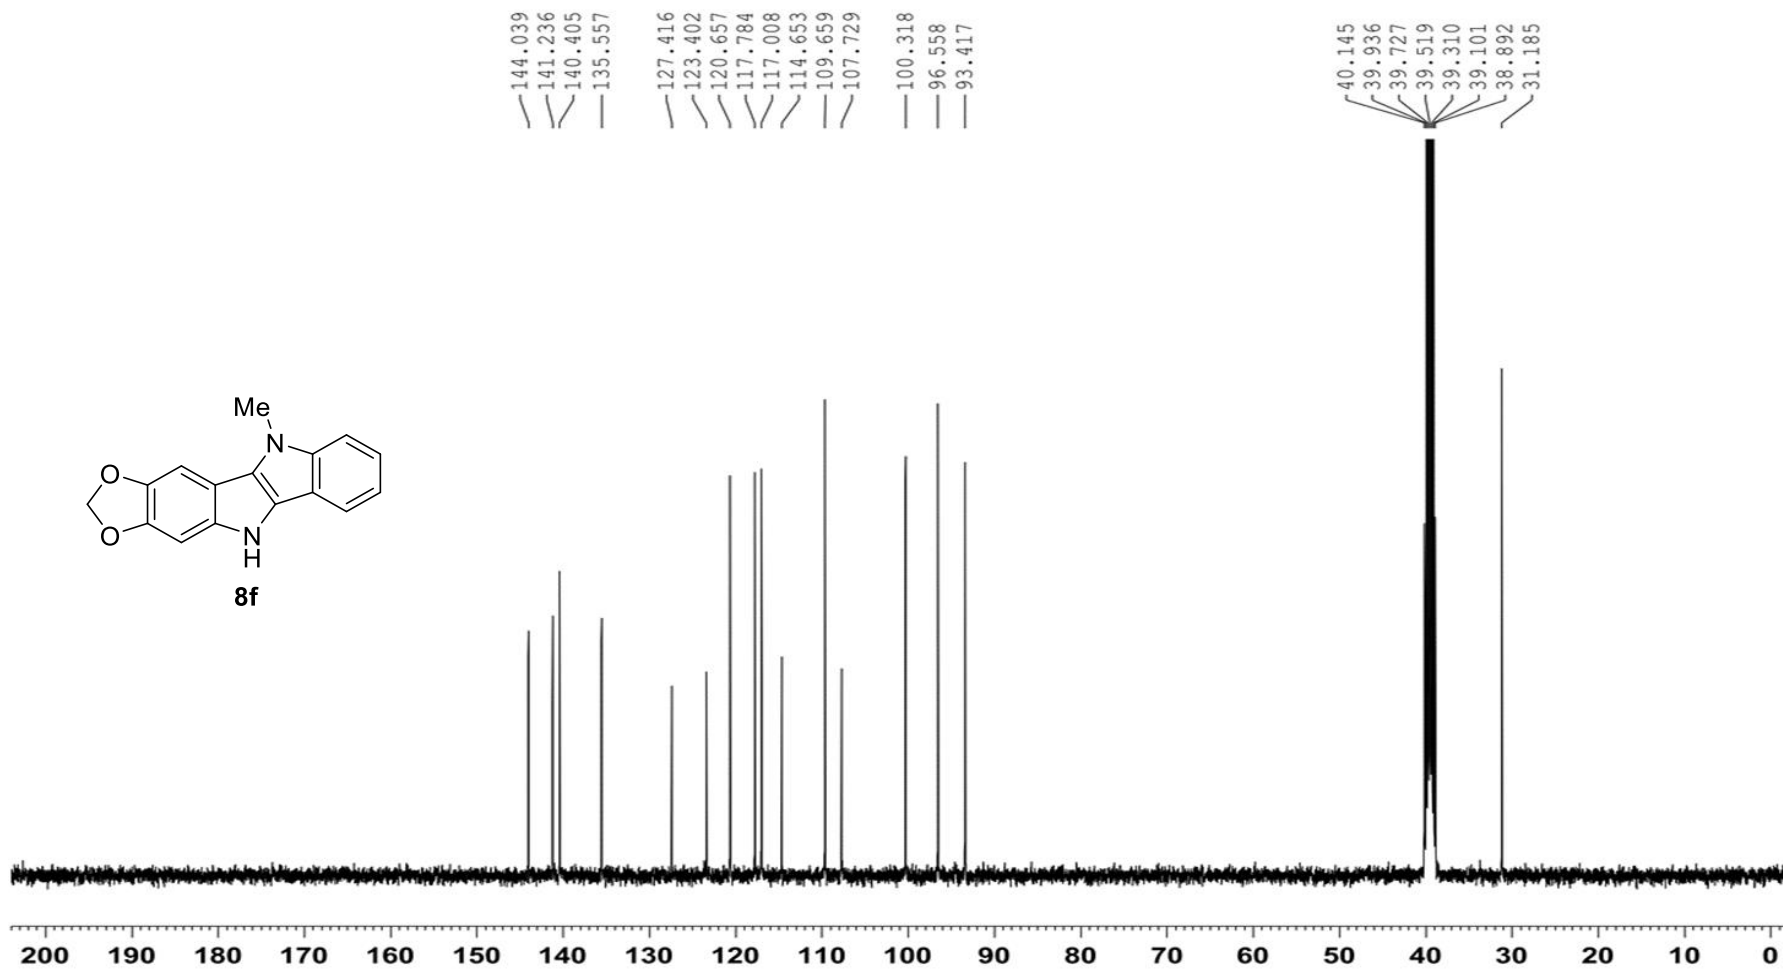

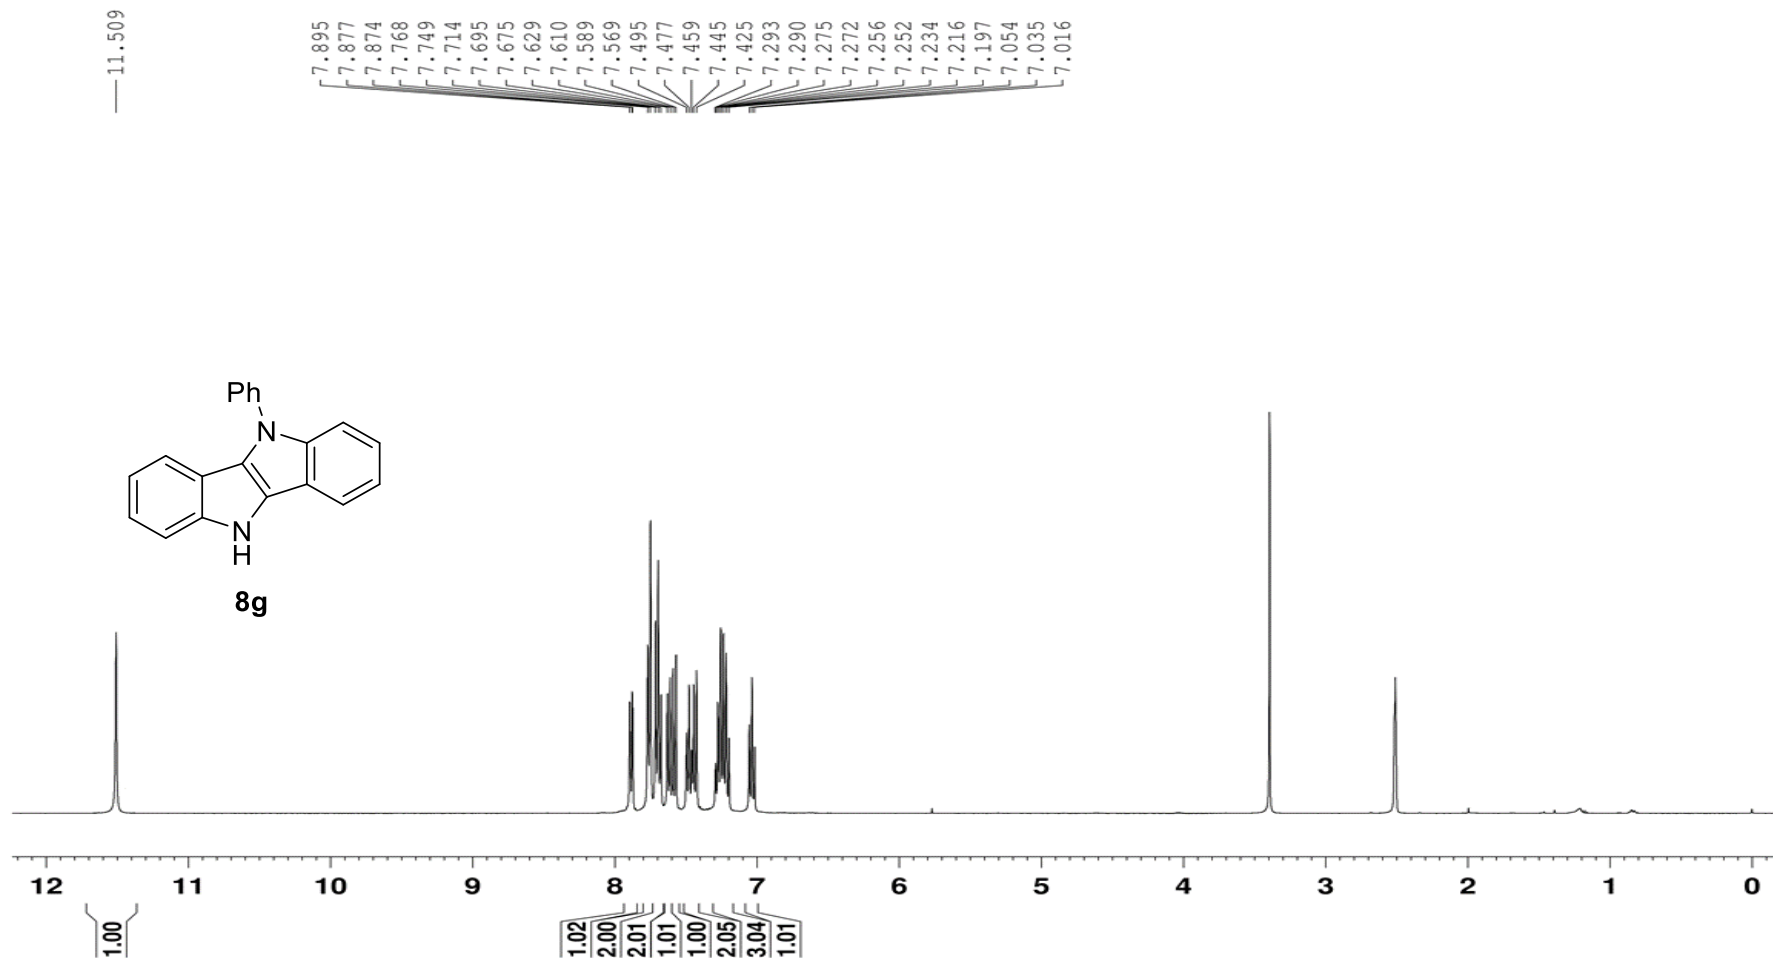

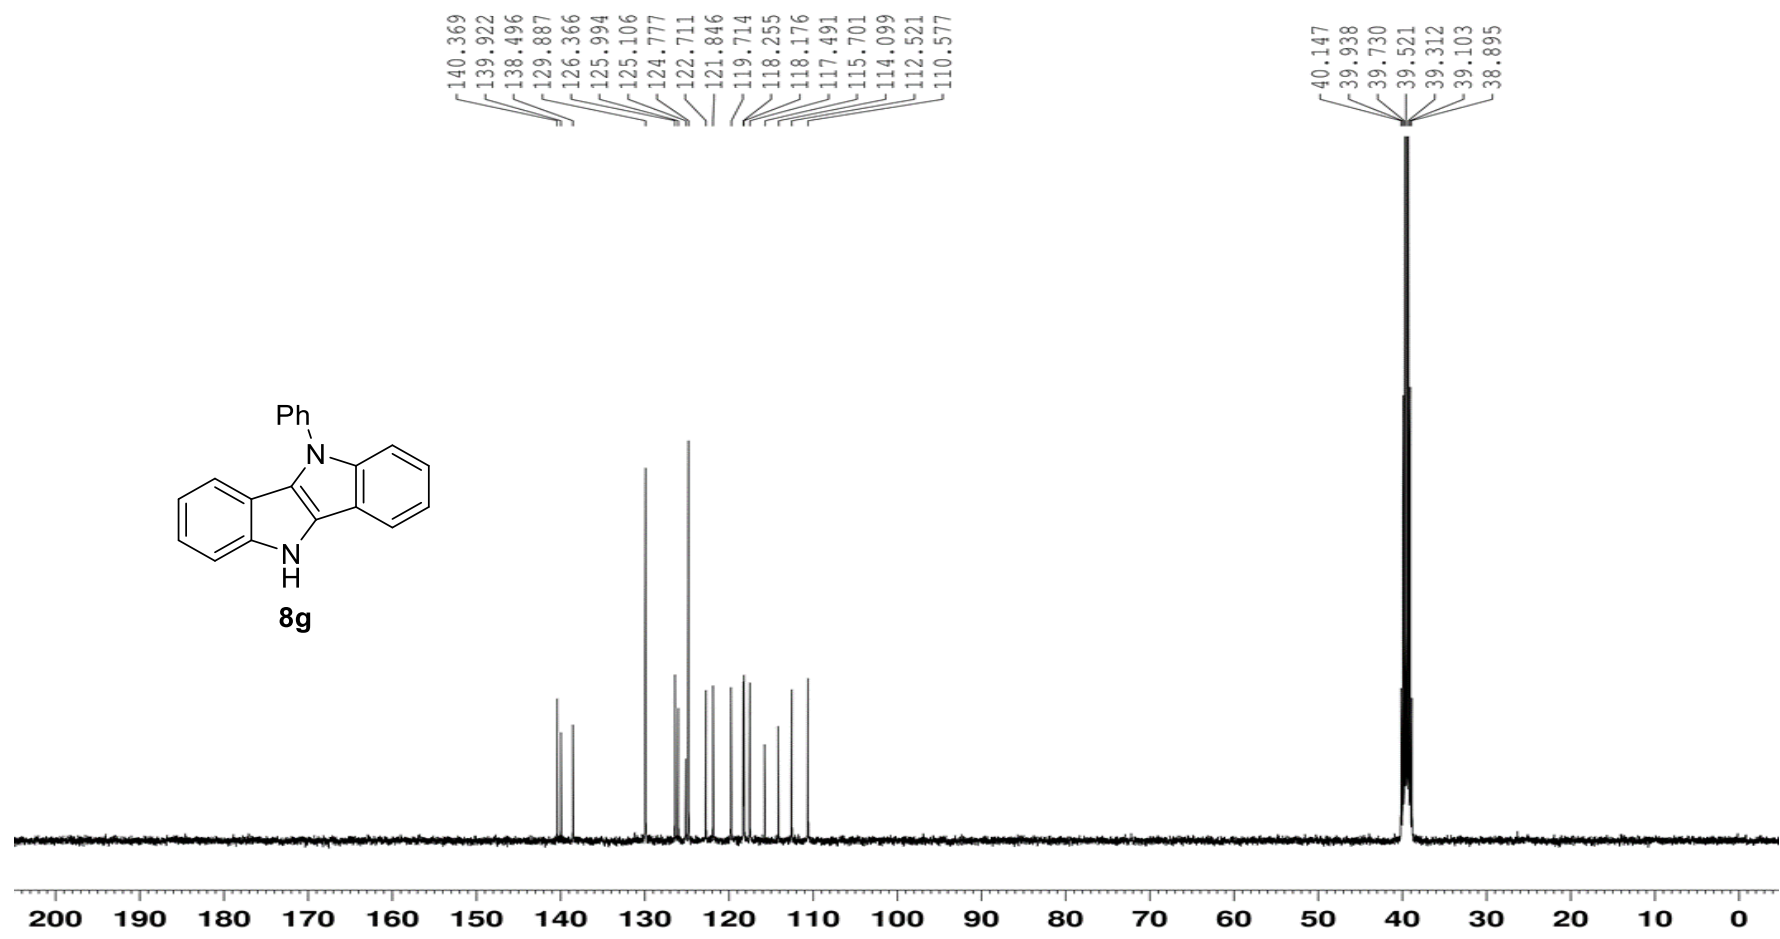

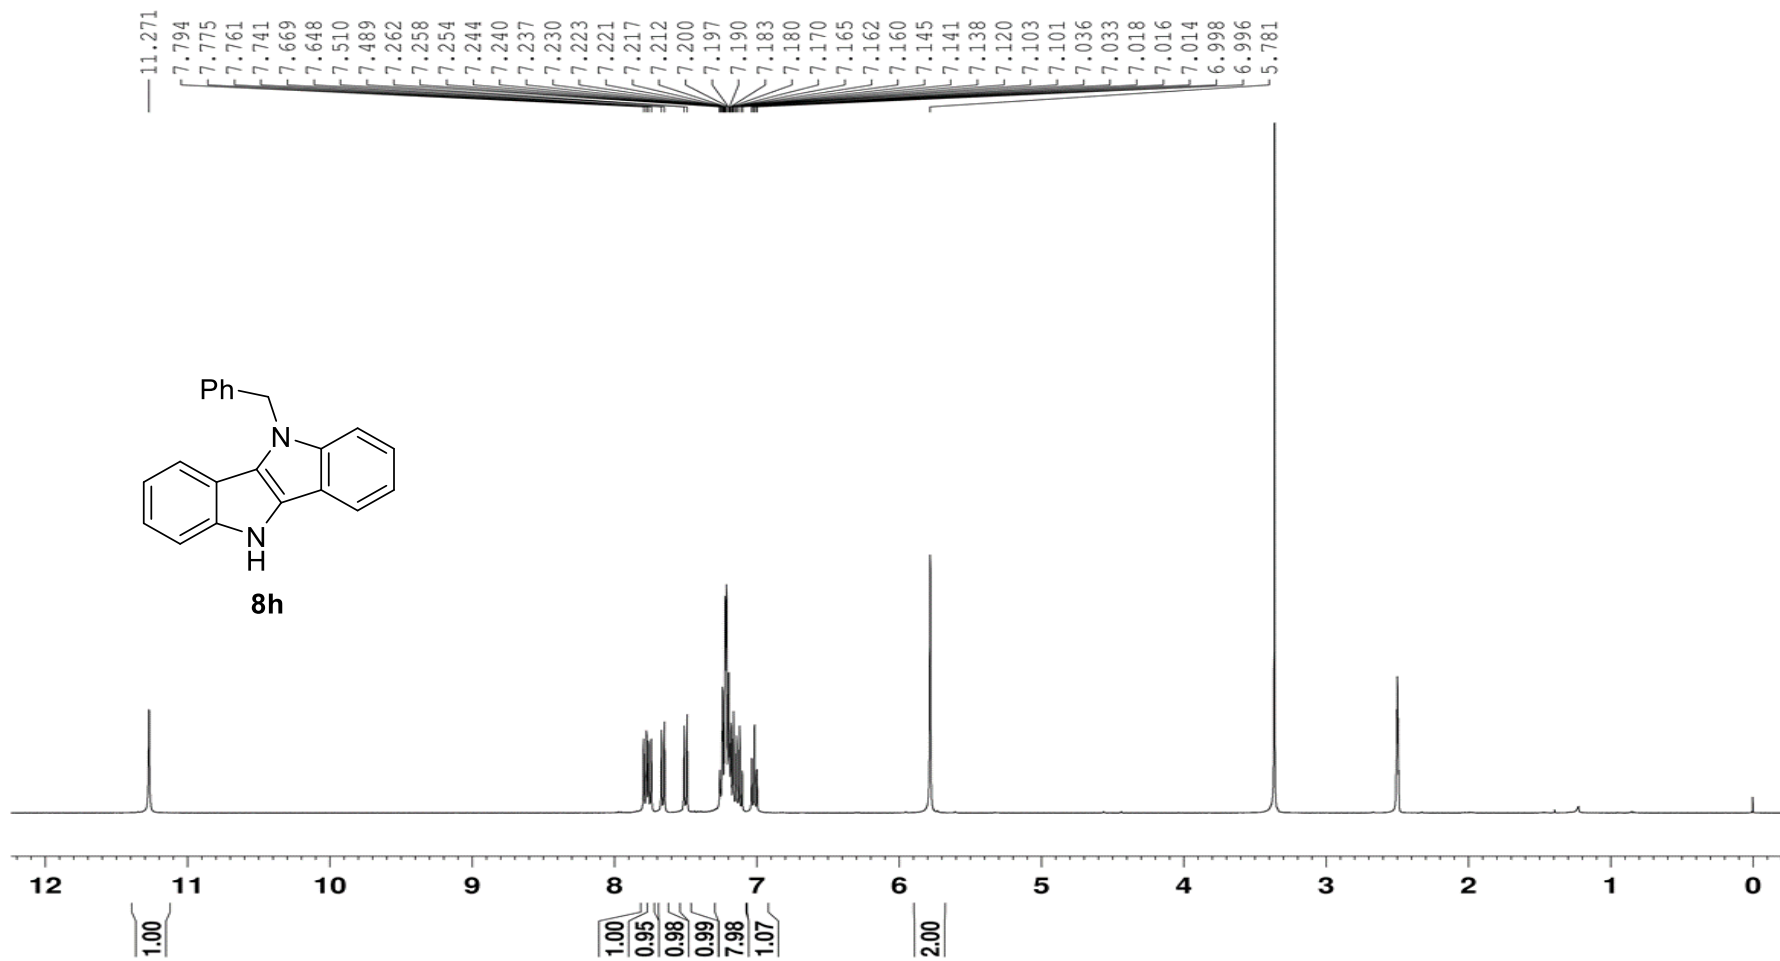



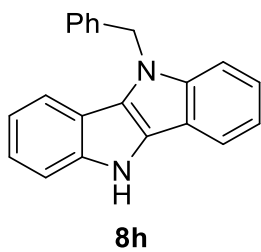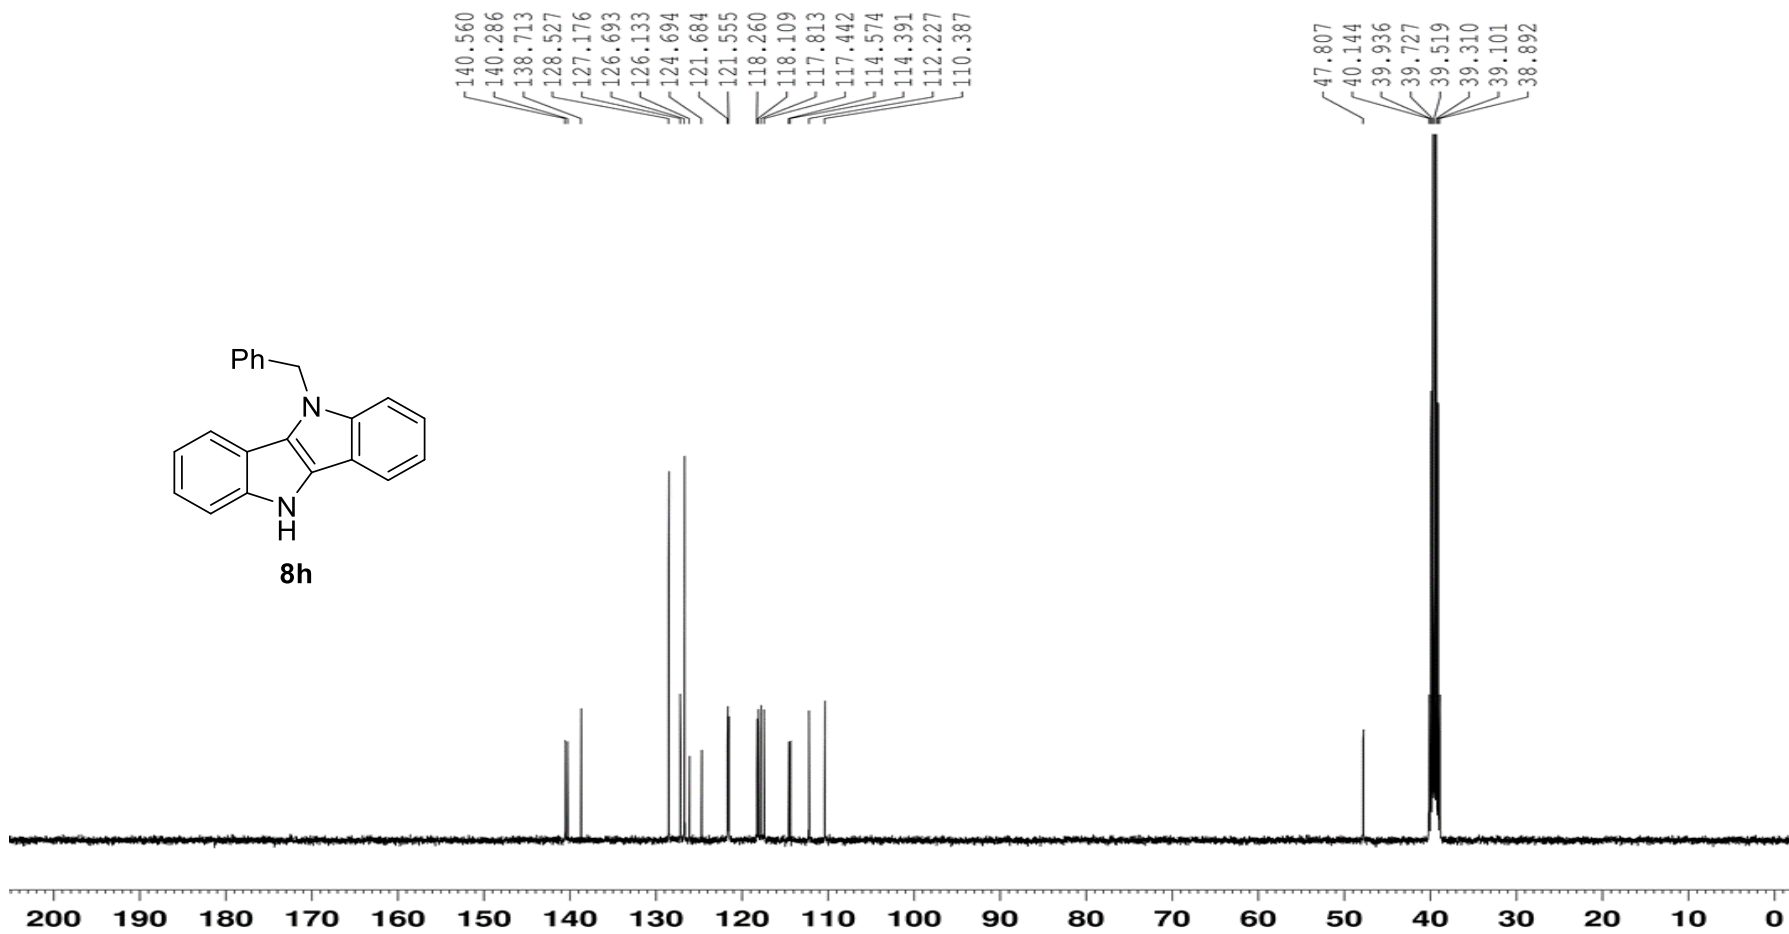

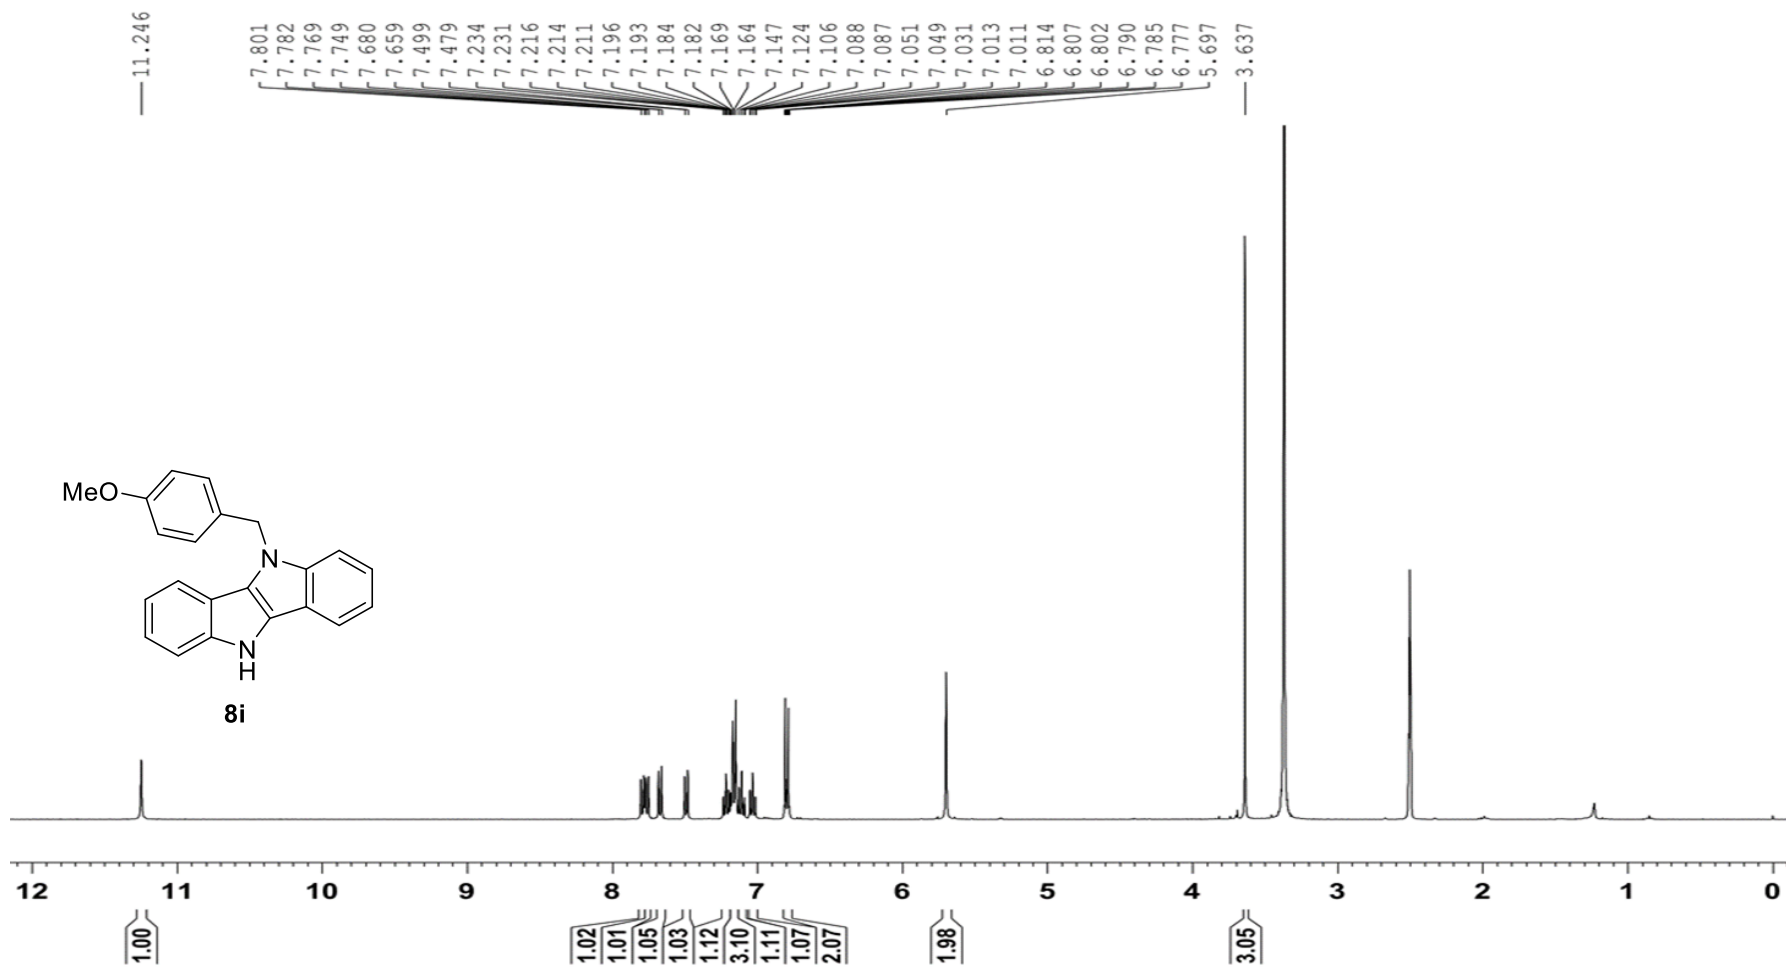

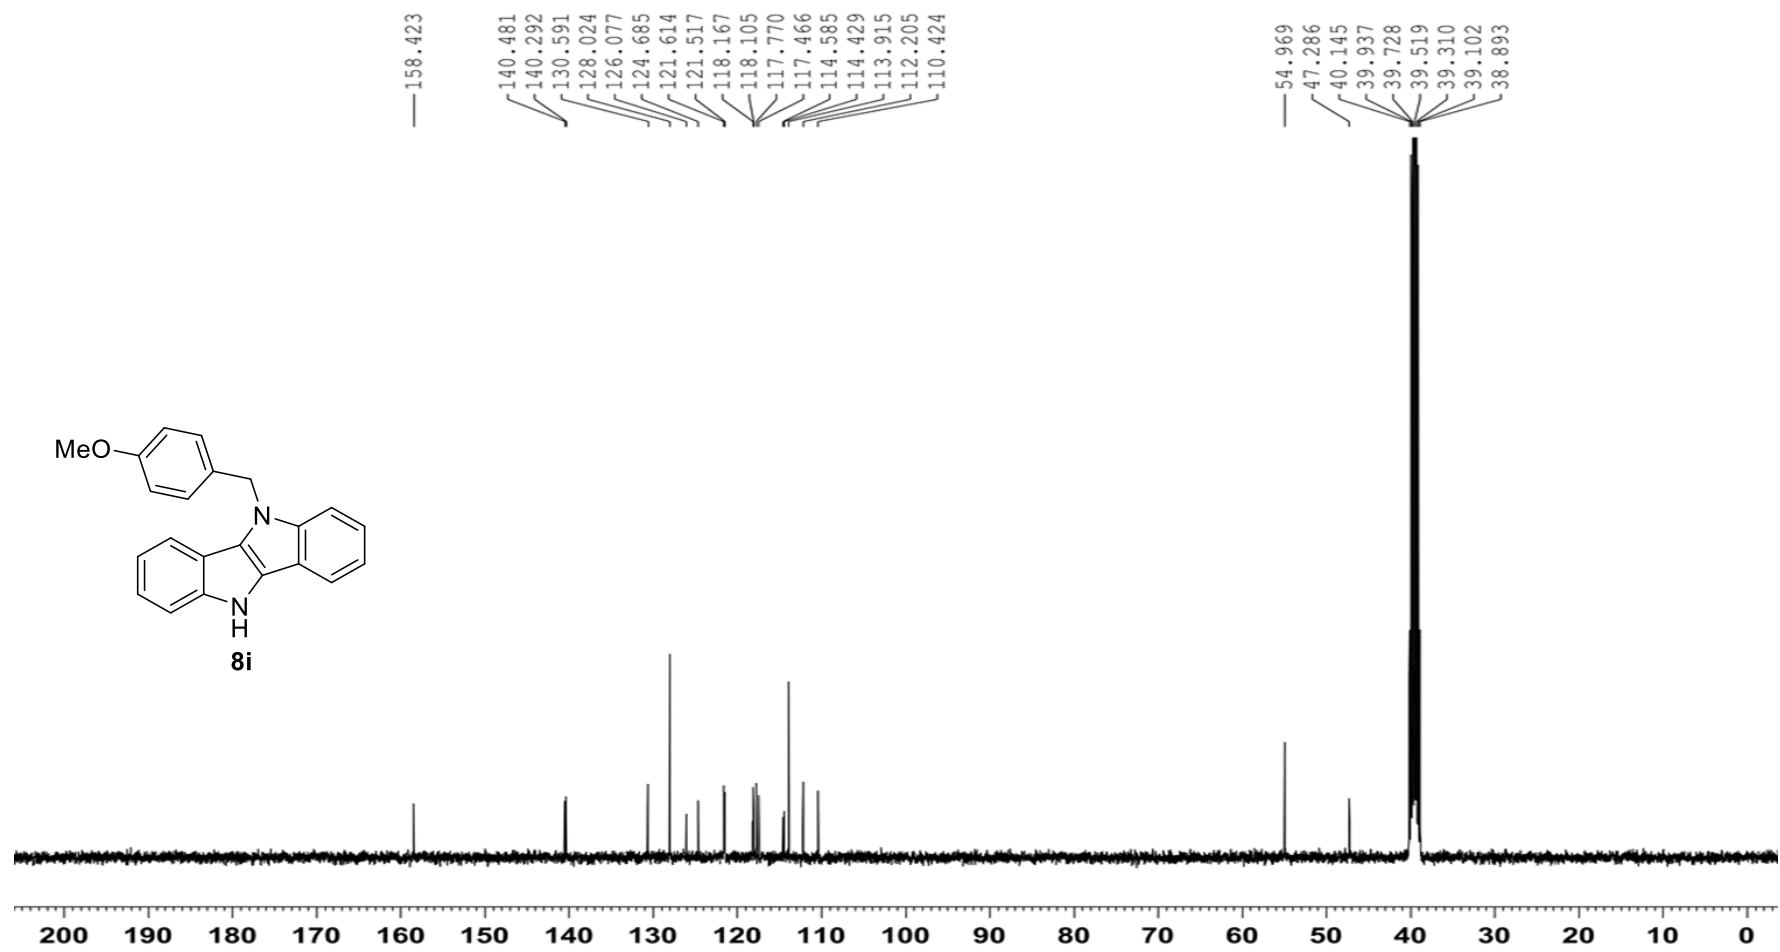

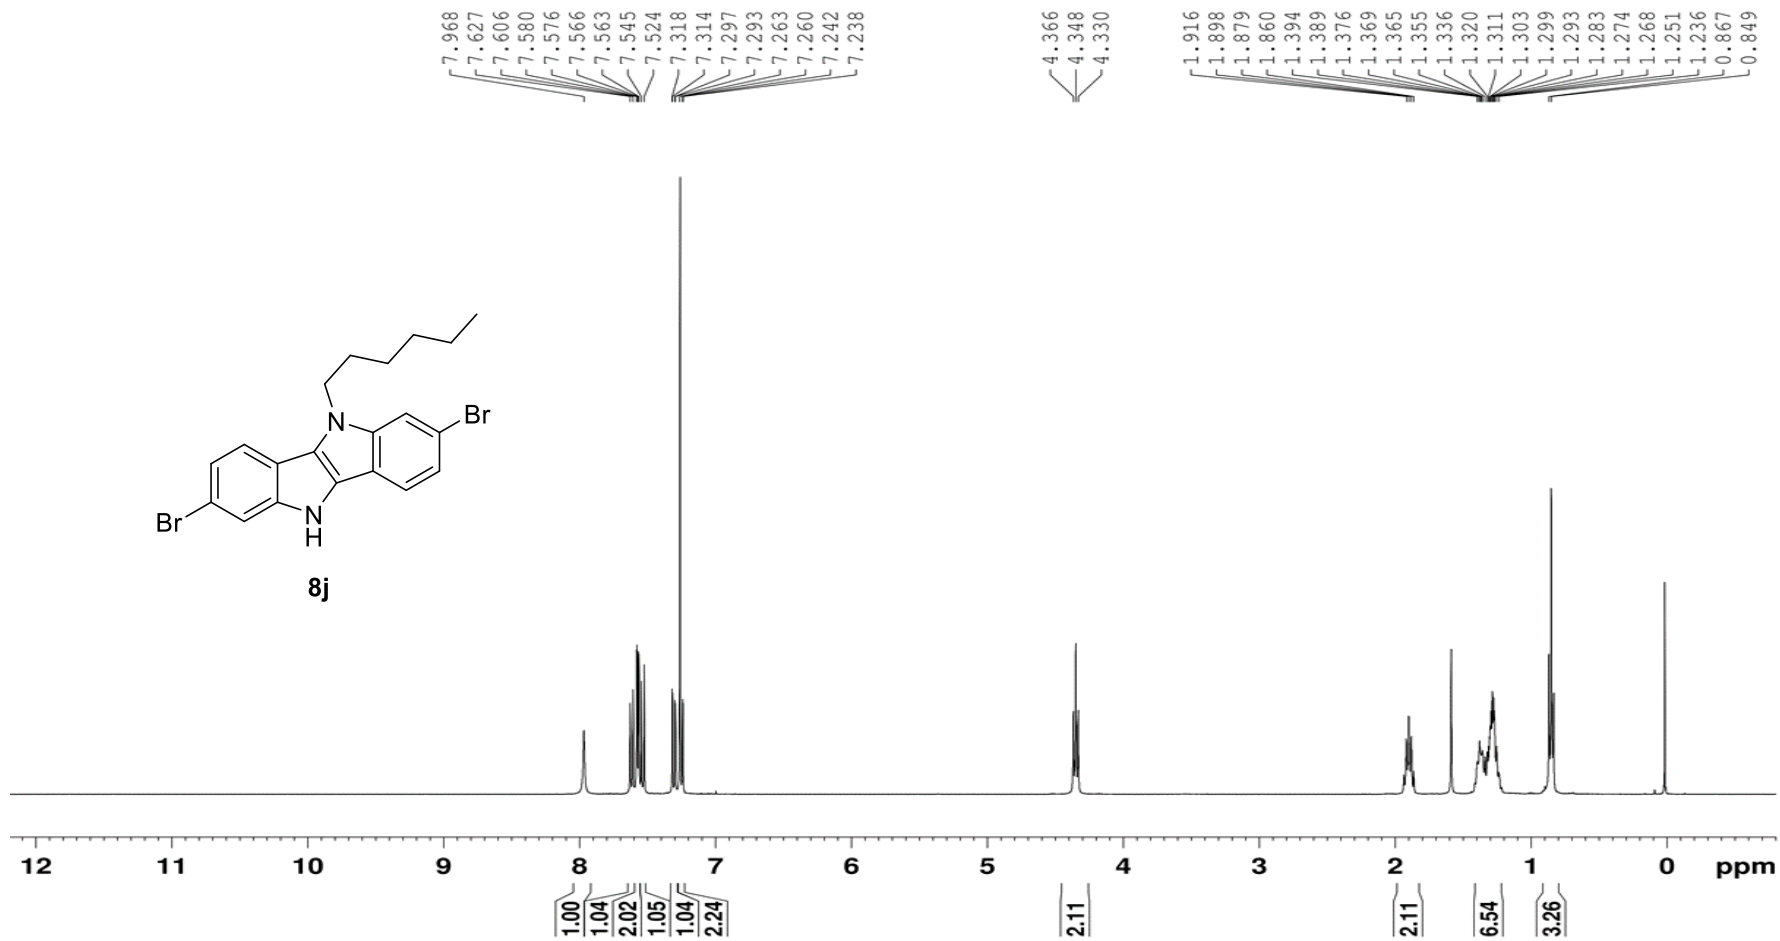

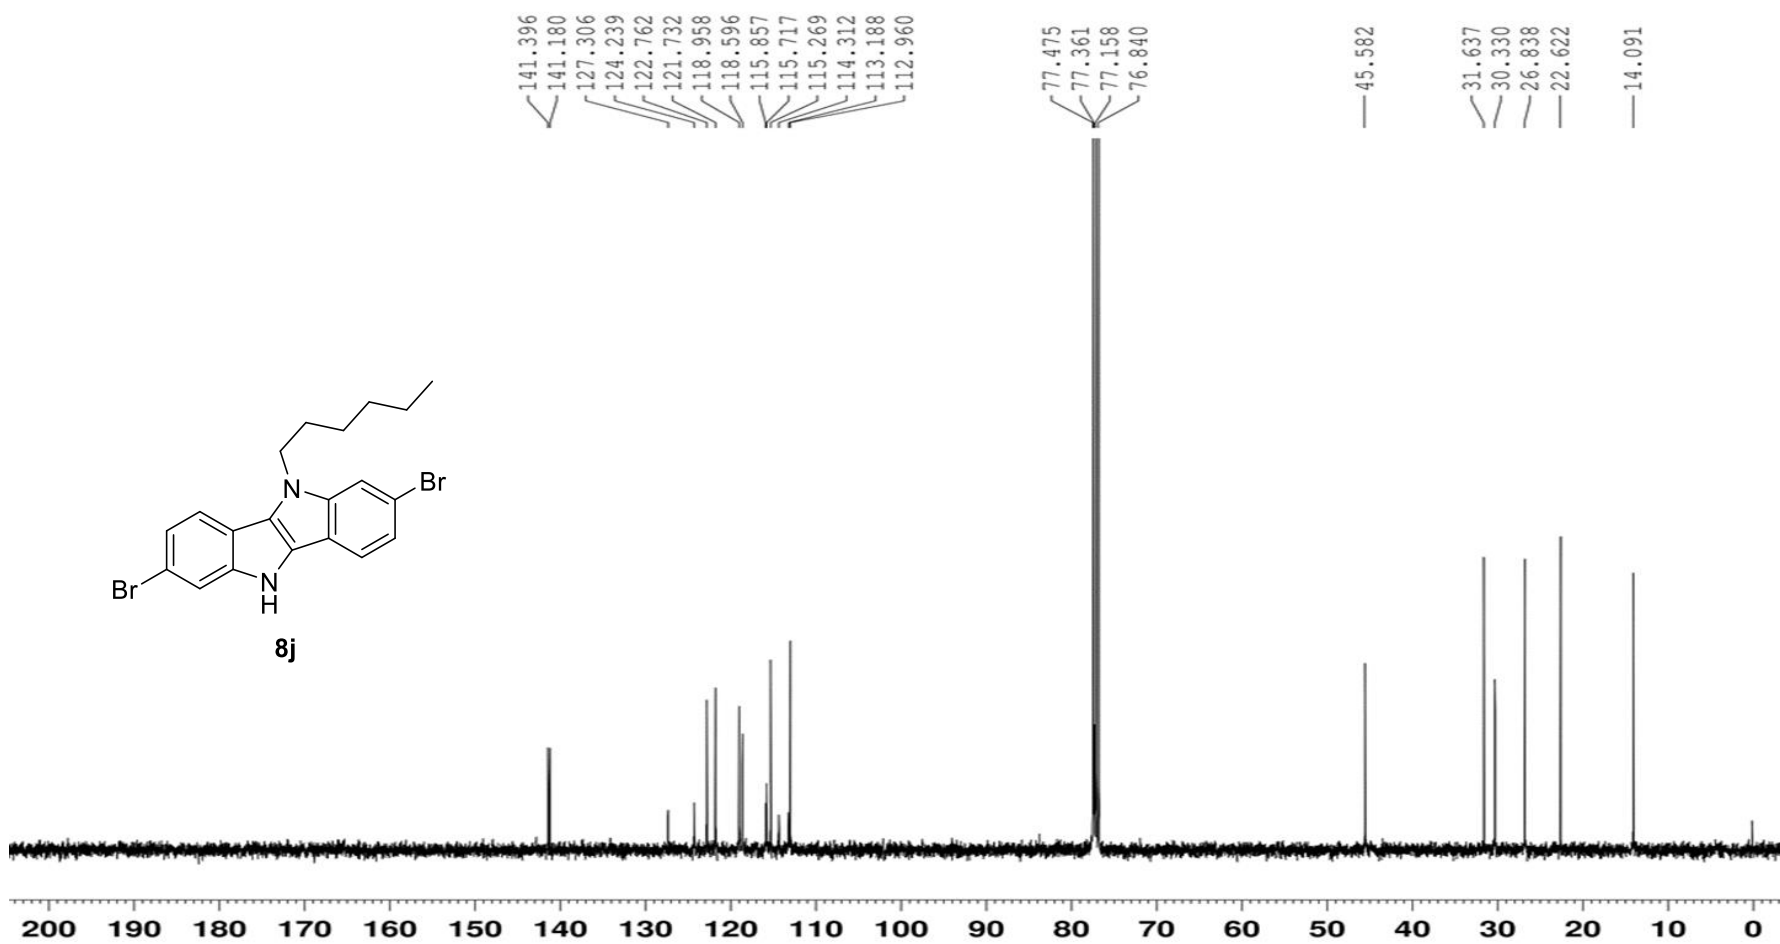

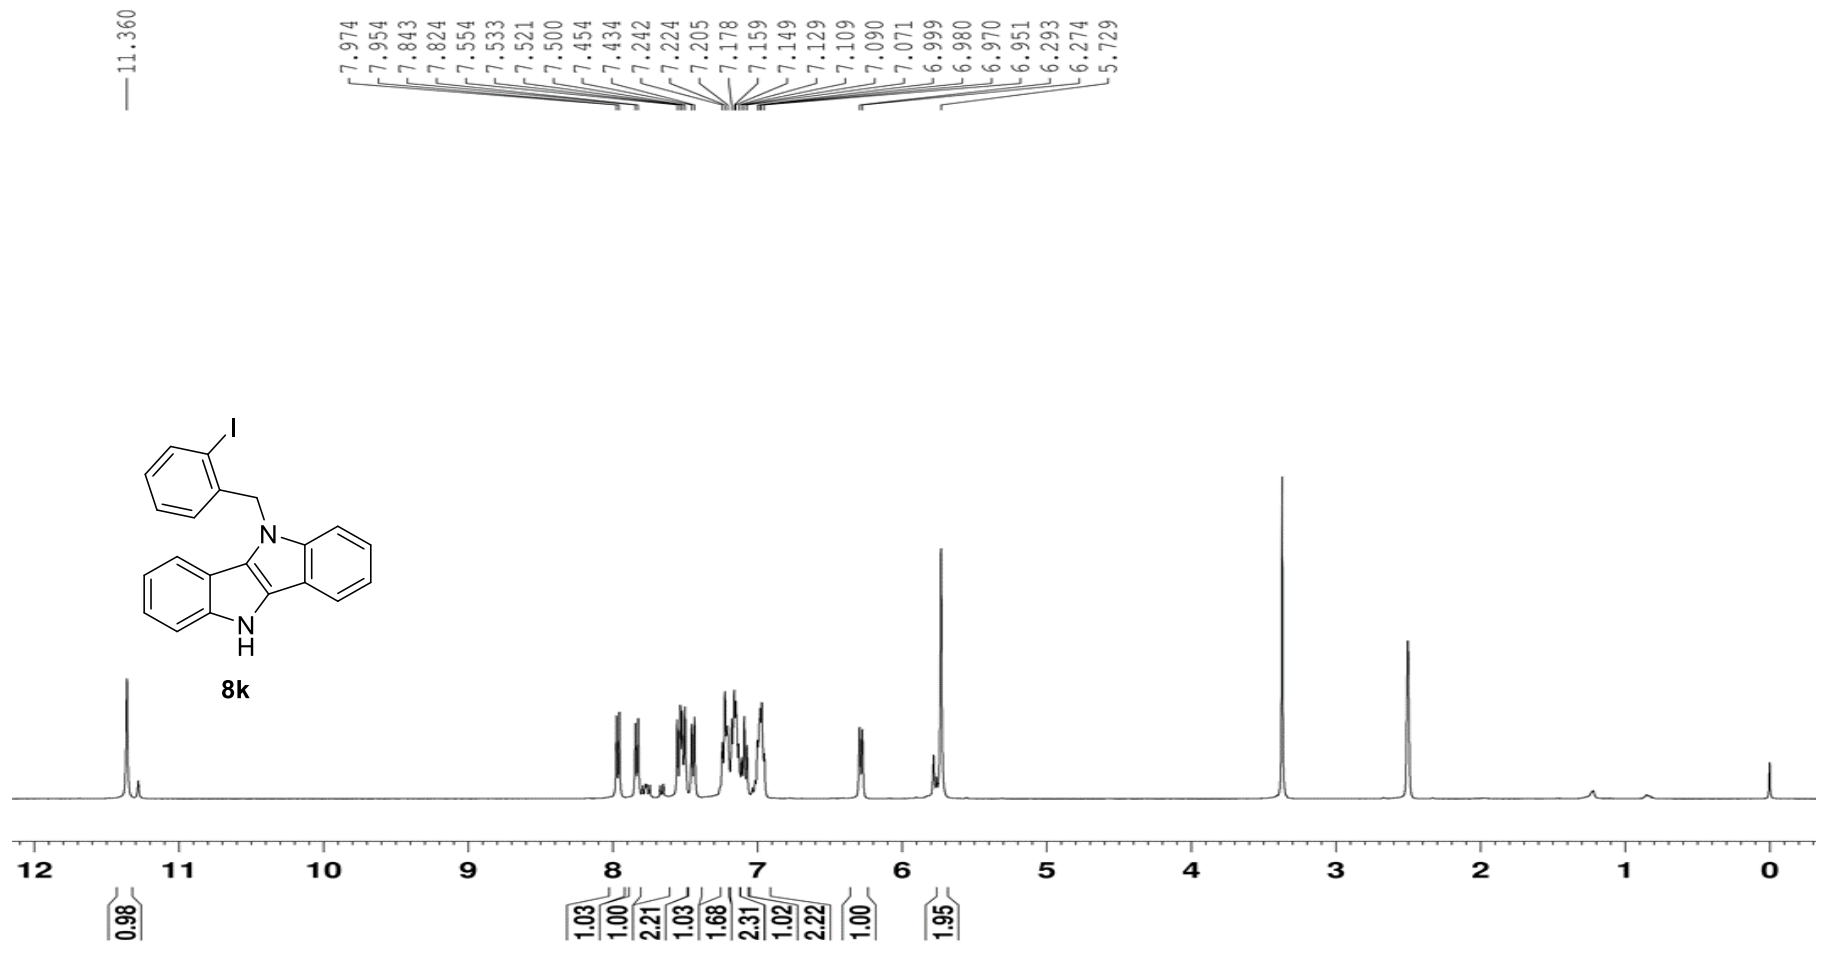

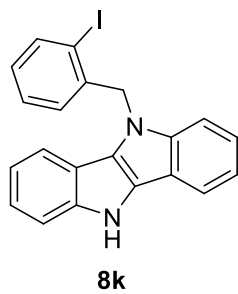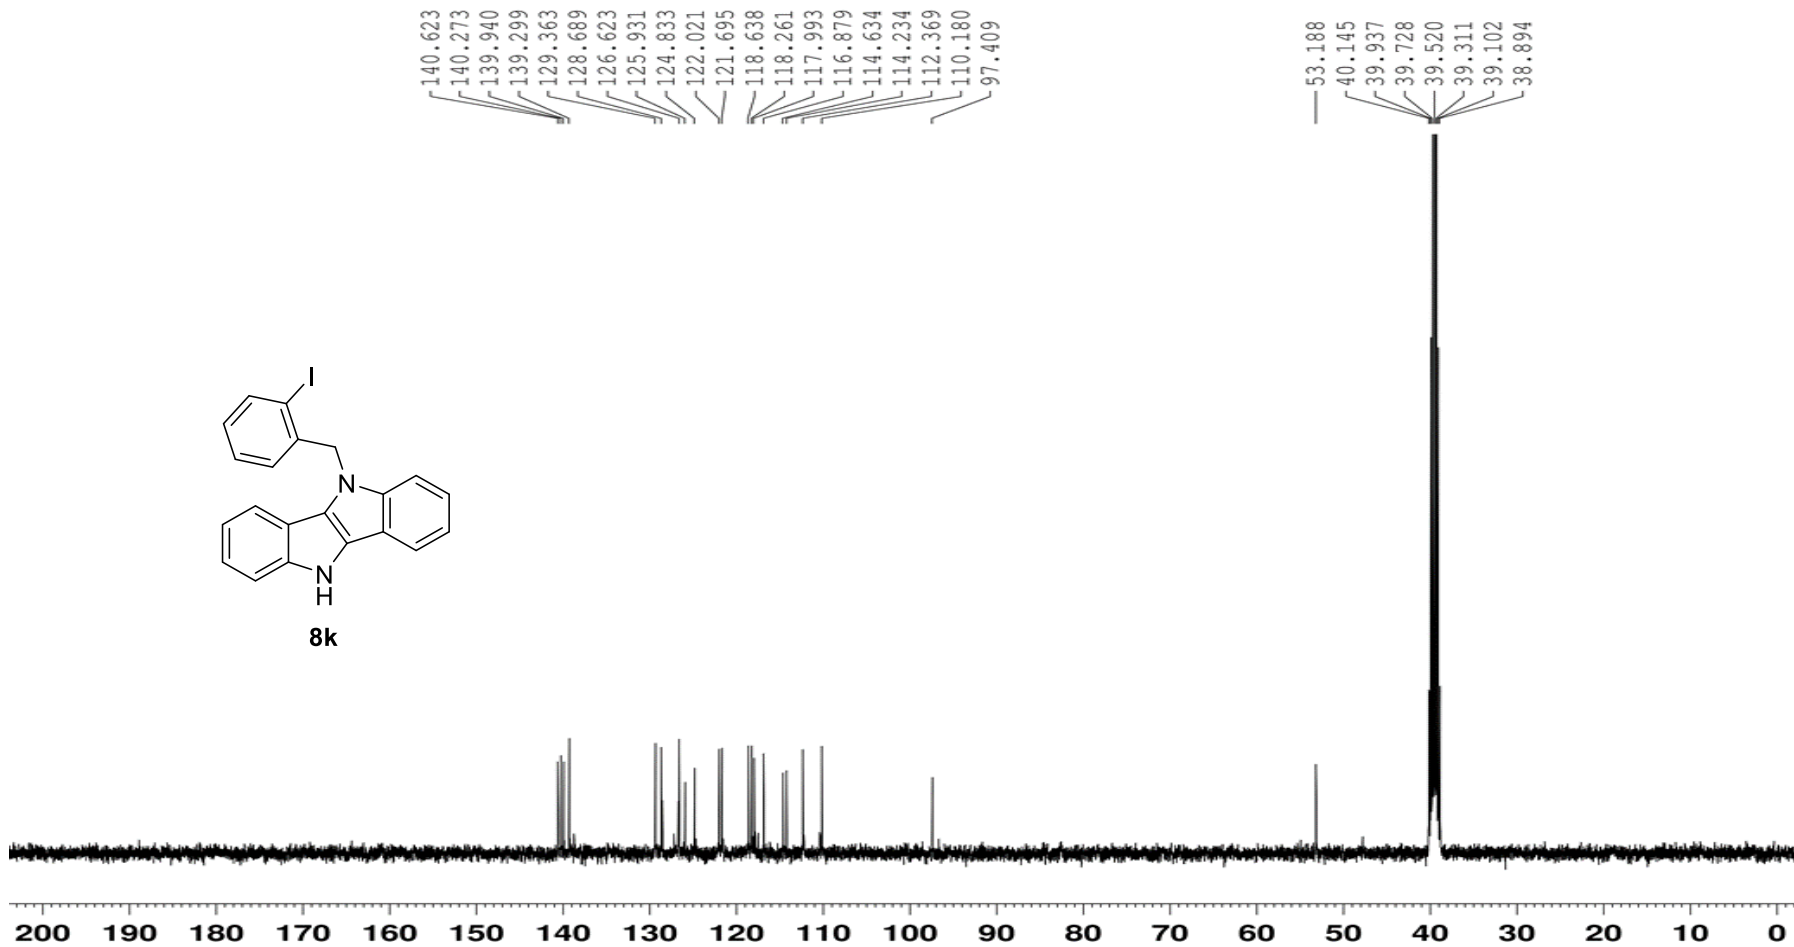

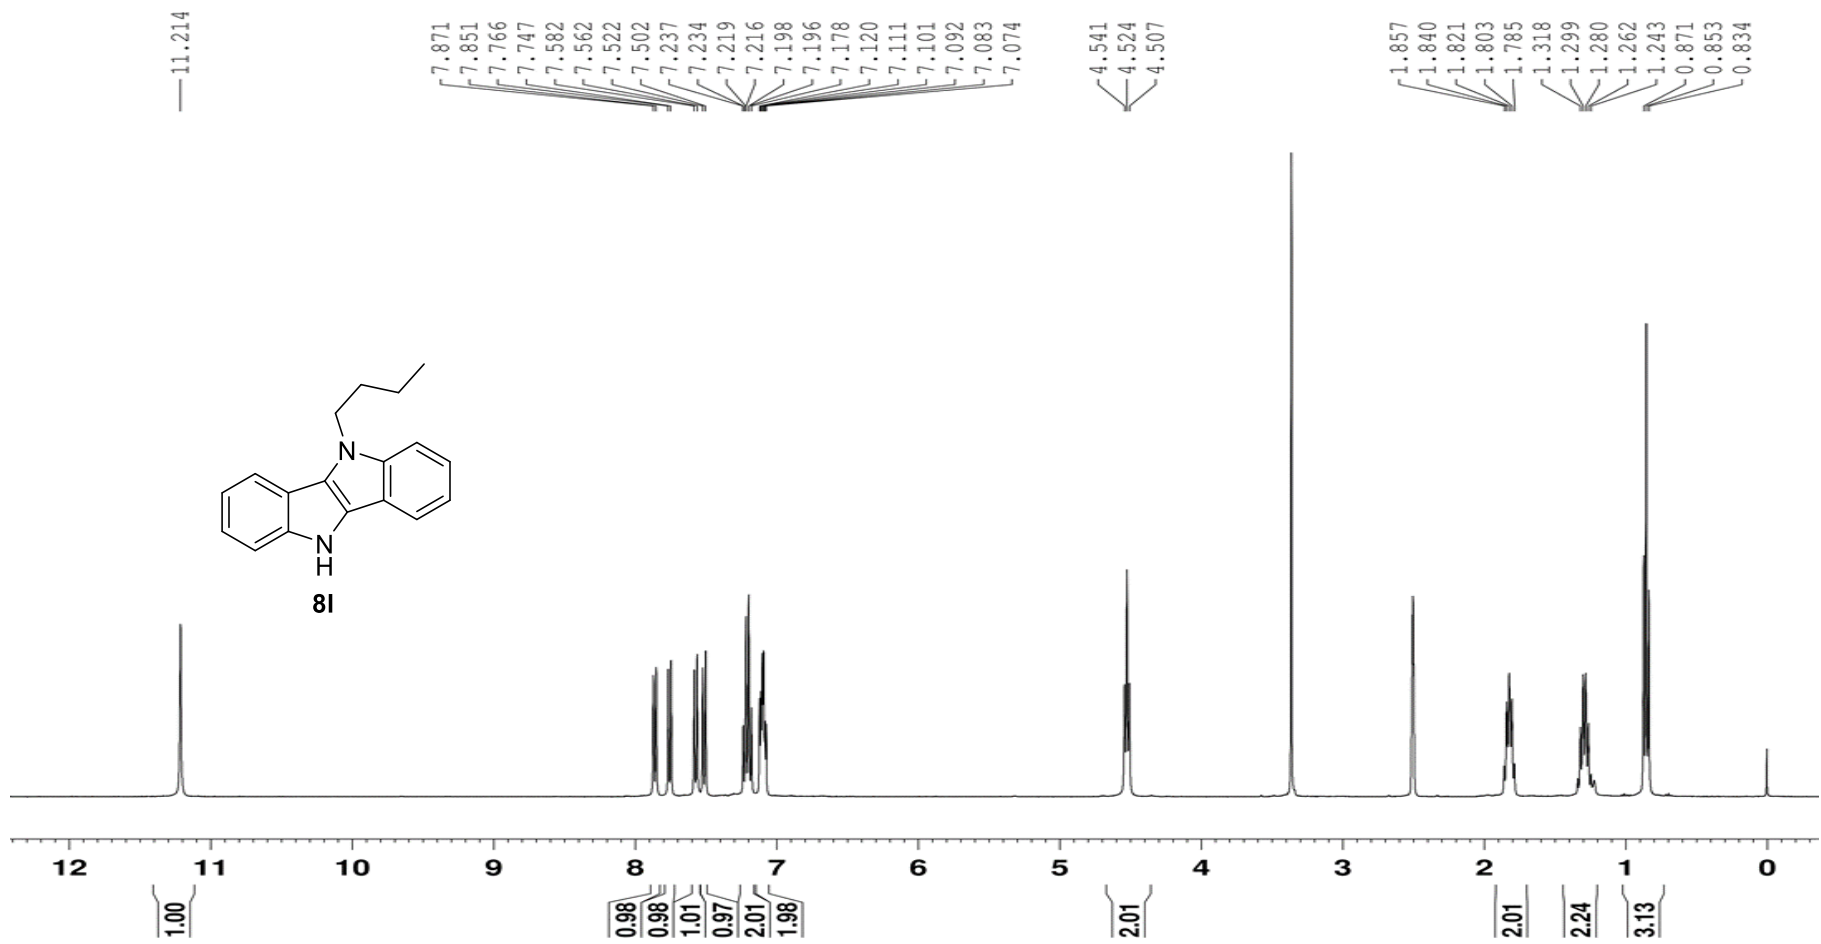



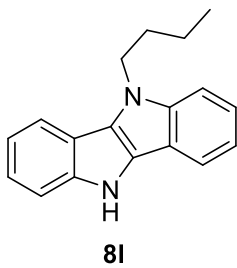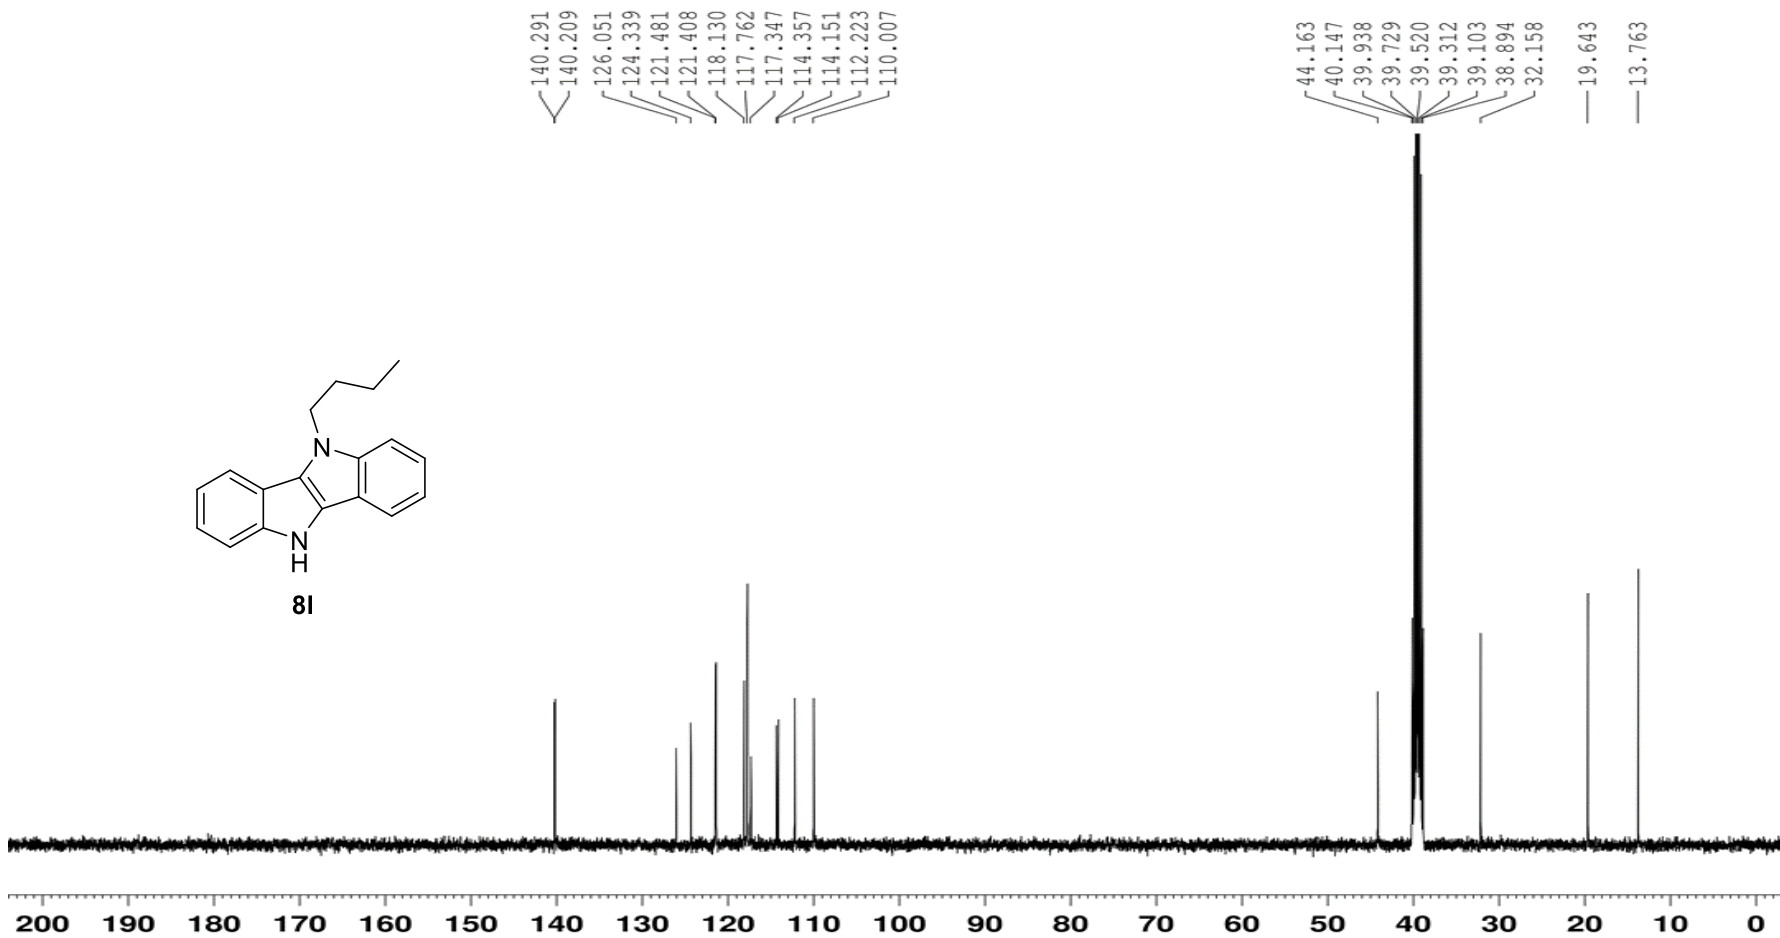

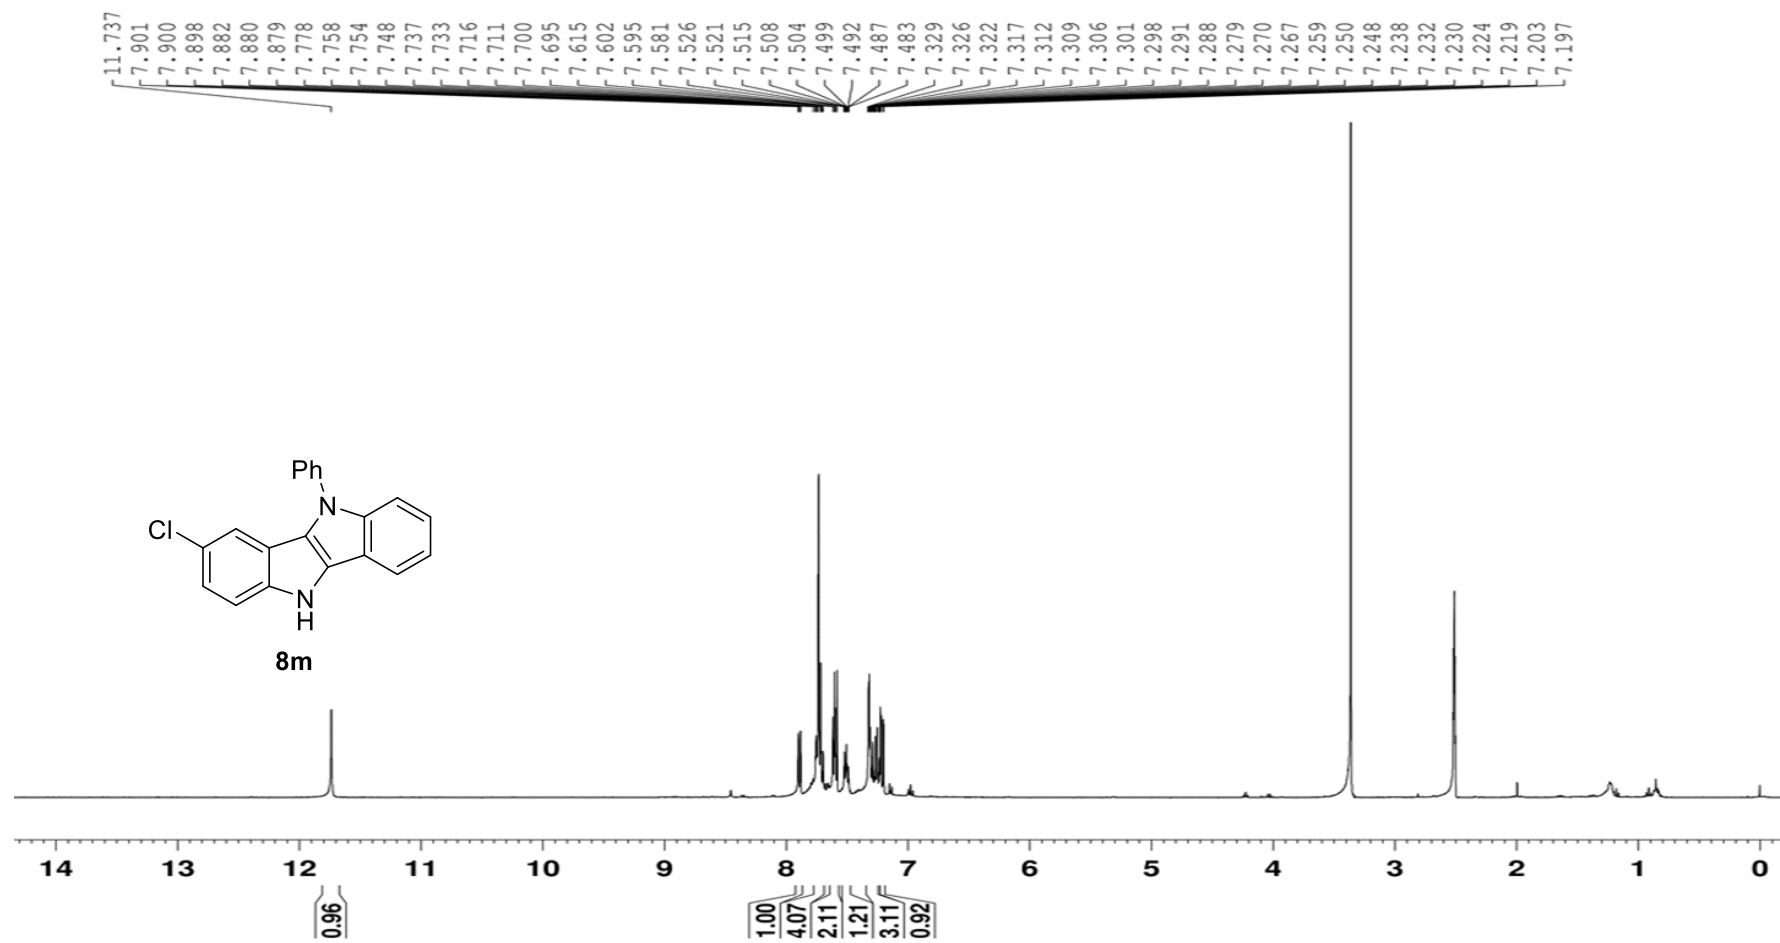

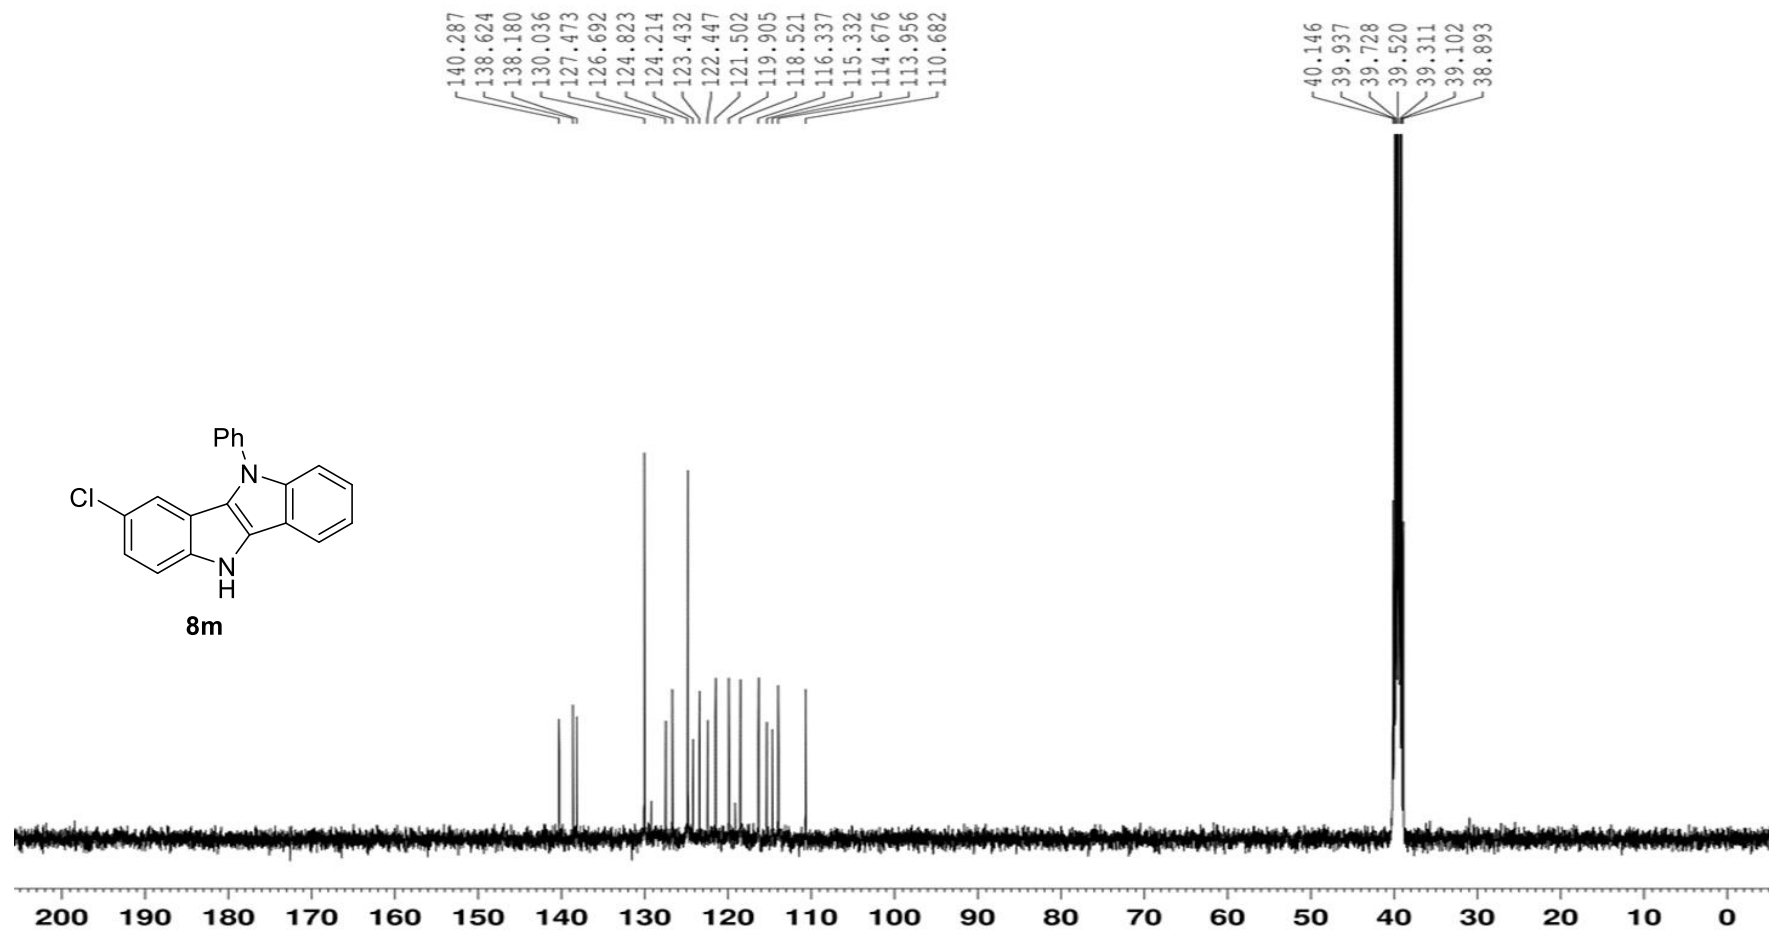

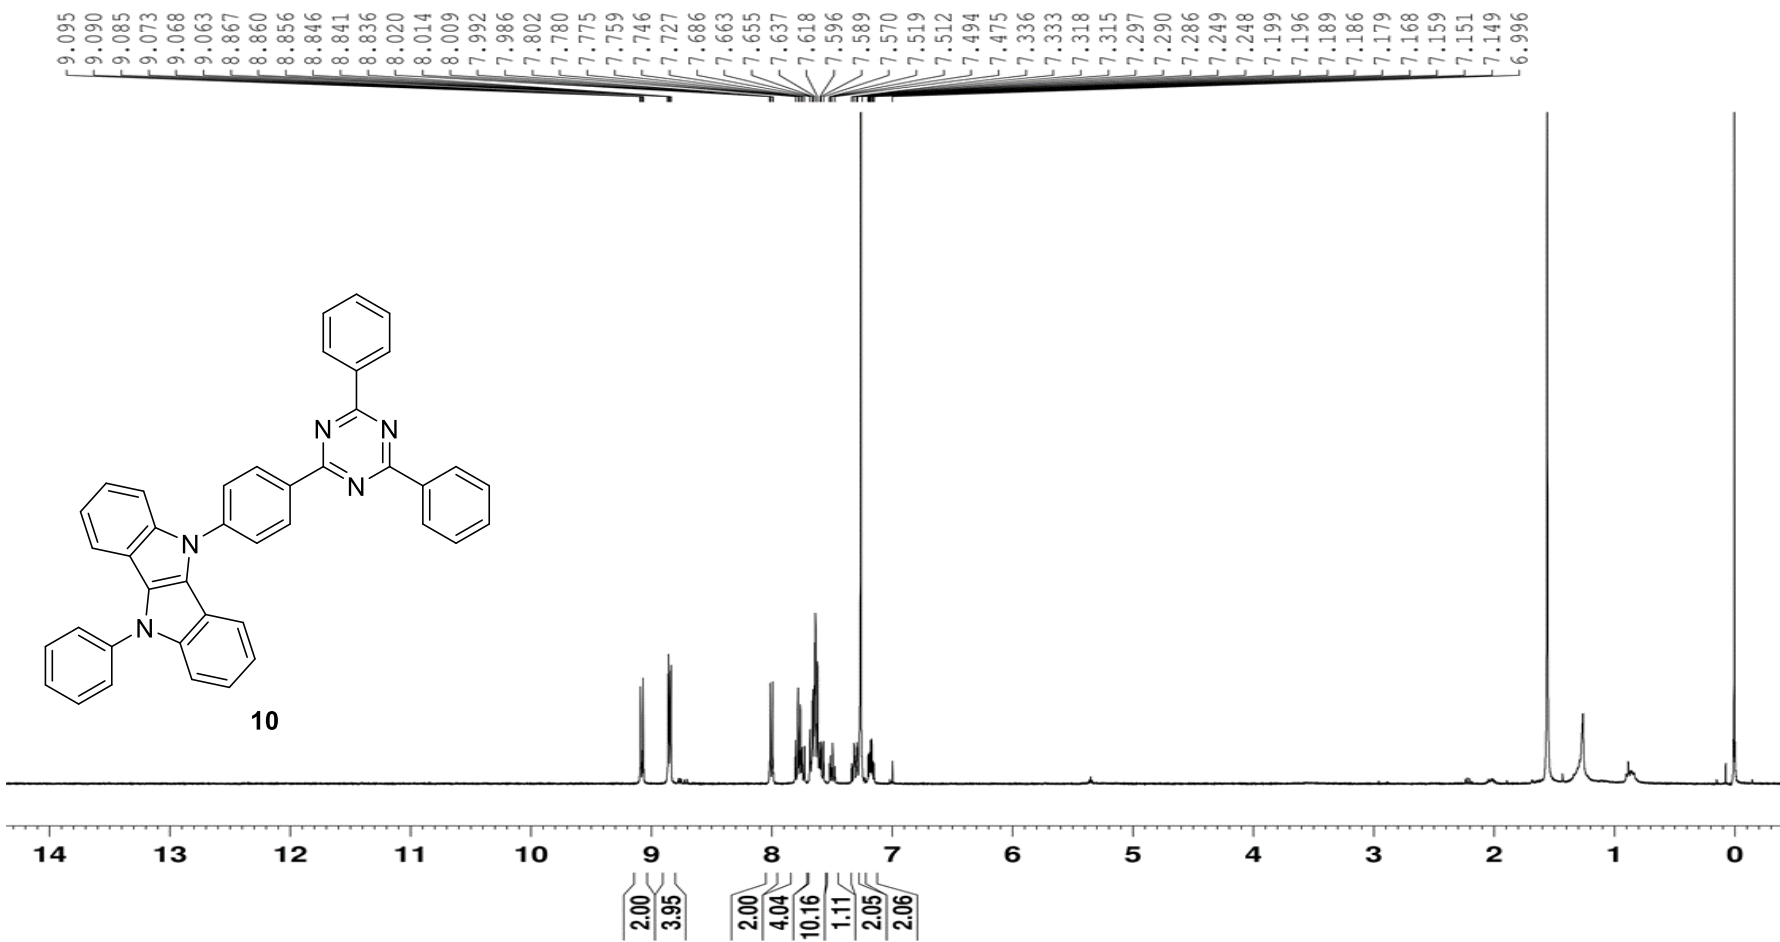

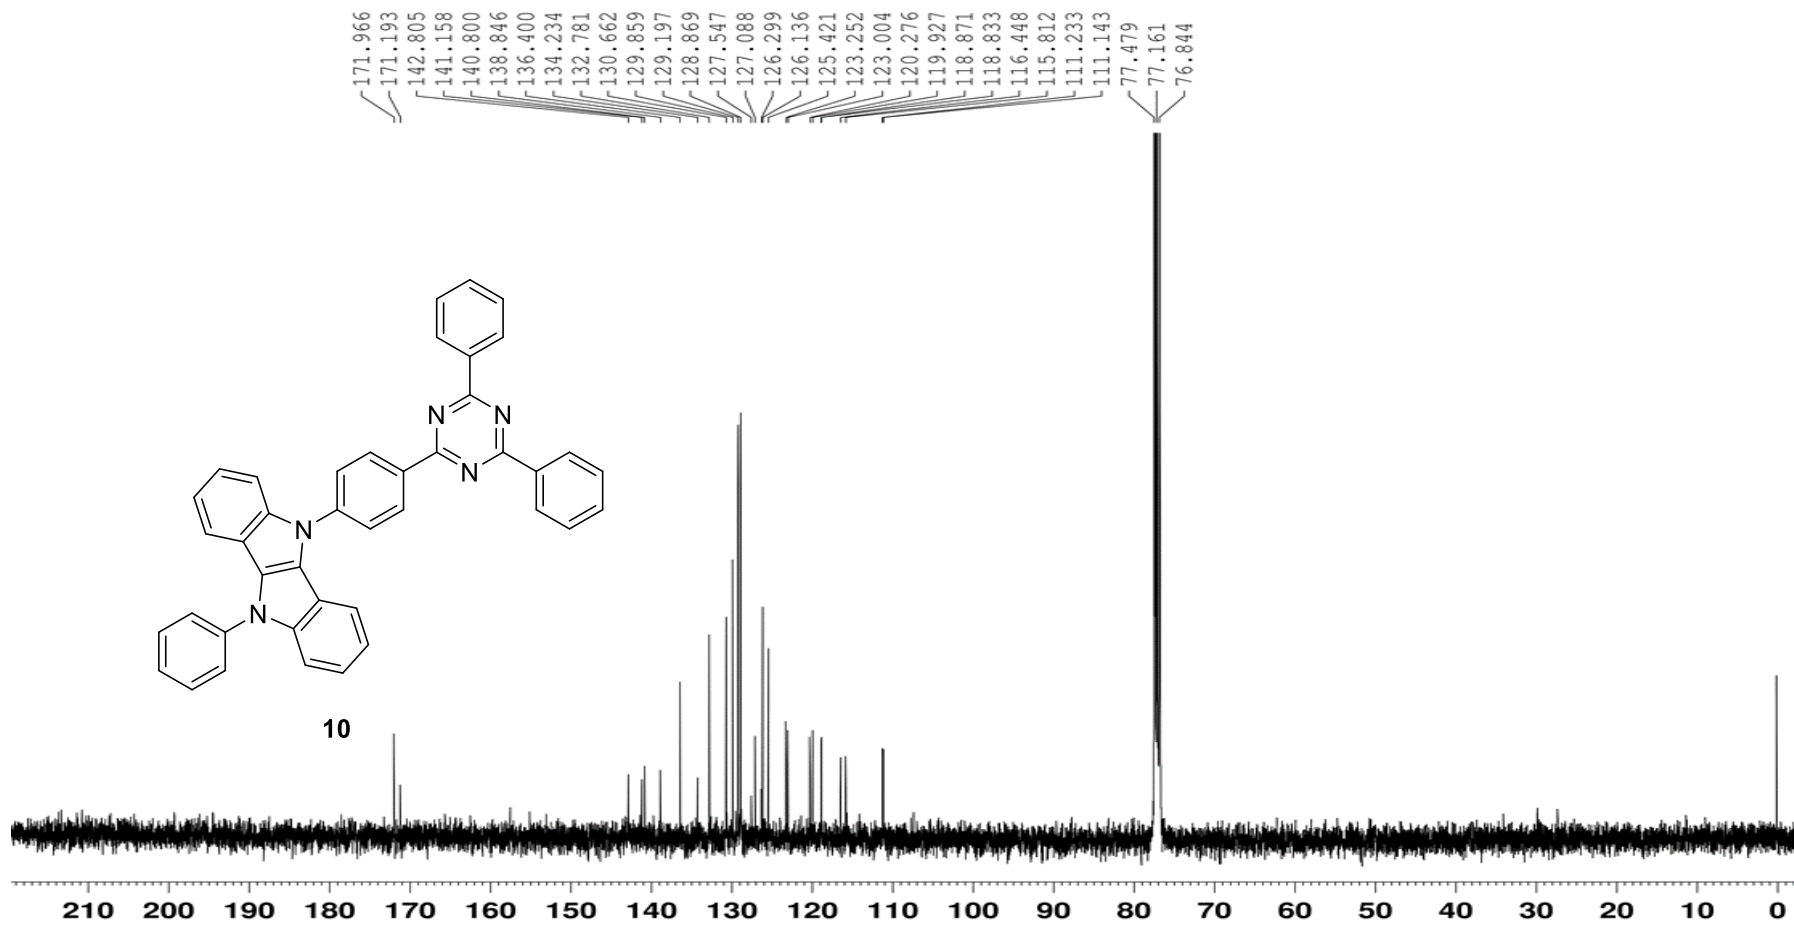

Supplement: d0cc01172j1.pdf [file d0cc01172j1.pdf]
